# Supplementary material
Source: JCI journal article supplement (doi:10.1172/jci202204)
Supplement: sd2 [file 2]

## Sheet: Sheet 1
Entrez_Gene_Symbol	Entrez_Gene_ID	Z_Score_Robust_ATG9A_Ratio_Mean_All_Replicates	Z_Score_Robust_ATG9A_Ratio_Replicate_A	Z_Score_Robust_ATG9A_Ratio_Replicate_B	Z_Score_Robust_ATG9A_Ratio_Replicate_C	Z_Score_Robust_Cell_Count_Mean_All_Replicates	Z_Score_Robust_Cell_Count_Replicate_A	Z_Score_Robust_Cell_Count_Replicate_B	Z_Score_Robust_Cell_Count_Replicate_C	Z_Score_Robust_ATG9A_Intensity_Inside_TGN_Mean_All_Replicates	Z_Score_Robust_ATG9A_Intensity_Inside_TGN_Replicate_A	Z_Score_Robust_ATG9A_Intensity_Inside_TGN_Replicate_B	Z_Score_Robust_ATG9A_Intensity_Inside_TGN_Replicate_C	Z_Score_Robust_ATG9A_Intensity_Outside_TGN_Mean_All_Replicates	Z_Score_Robust_ATG9A_Intensity_Outside_TGN_Replicate_A	Z_Score_Robust_ATG9A_Intensity_Outside_TGN_Replicate_B	Z_Score_Robust_ATG9A_Intensity_Outside_TGN_Replicate_C	ATG9A_Intensity_Inside_Down_Outside_Up	Performance_and_Toxicity
A1BG	1	0.654411	0.061144	2.34841	-0.44632	-0.12971	0.607042	-0.726375	-0.269796	-1.03997	-0.614632	-1.76963	-0.735647	-3.64161	-0.789151	-9.94091	-0.194773	FALSE	no hit
AATK	9625	-0.478769	-1.63186	-1.26296	1.45852	-0.903881	-0.0363187	1.01881	-3.69413	-0.921695	-0.749179	-1.37523	-0.640672	0.101915	-0.0169345	0.896228	-0.573548	TRUE	no hit
ABCB1	5243	-0.0575374	-1.74407	-0.471174	2.04263	-2.33635	-0.228289	-1.09428	-5.68648	-0.809674	-0.696592	-0.893572	-0.838858	-0.234245	0.0613555	0.230479	-0.99457	FALSE	no hit
ABCC3	8714	-1.19462	-1.77907	-1.72415	-0.0806408	-1.4213	0.0622607	-0.735808	-3.59037	-0.702727	-0.807634	-0.623893	-0.676653	1.58748	0.110461	4.86787	-0.215887	TRUE	no hit
ABCG1	9619	-1.58414	-2.37844	-3.04891	0.67492	-1.65085	-0.207536	-1.73575	-3.00927	-1.22826	-1.62525	-1.60683	-0.452694	1.43237	-0.420636	4.90844	-0.190698	TRUE	no hit
ABHD3	171586	-1.96967	-2.7183	-2.6366	-0.554122	-1.76201	-0.399506	-0.528272	-4.35825	-1.76875	-1.99313	-1.86373	-1.44939	0.913522	-0.641551	4.32415	-0.94203	TRUE	no hit
ACADS	35	-1.05686	-0.649929	-1.05023	-1.47043	-1.26031	0.145275	-1.20748	-2.71872	-1.21771	-1.24049	-1.25512	-1.15752	-0.204142	-0.863784	0.591663	-0.340305	FALSE	no hit
ACO1	48	-1.94034	-2.01486	-1.83876	-1.9674	-0.935011	0.326869	-0.641474	-2.49043	-0.855247	-0.907988	-0.709604	-0.948148	1.63869	0.0442253	4.90815	-0.0362936	TRUE	no hit
ACRBP	84519	-1.23969	-1.42409	-1.97169	-0.323308	-0.772913	0.664114	-0.471672	-2.51118	-0.66693	-1.01329	-0.287143	-0.700356	2.23749	-0.394219	7.29385	-0.18715	TRUE	no hit
ACTG1	71	-2.59337	-2.82857	-2.14868	-2.80287	-1.58104	2.6357	-1.65085	-5.72798	-1.28659	-1.64405	-0.949638	-1.26607	1.63024	-0.203921	5.12351	-0.028882	TRUE	no hit
ACVR1C	130399	-1.80925	-2.65179	-2.00846	-0.767481	-0.226402	0.207536	0.358471	-1.24521	-1.61672	-2.26072	-1.26558	-1.32386	0.471621	-0.821798	2.99034	-0.753678	TRUE	no hit
ADAM17	6868	-3.57412	-3.70913	-3.14449	-3.86874	-1.92253	0.0207536	-1.57538	-4.21297	-1.27679	-1.91289	-0.66215	-1.25531	3.08114	0.03909	8.97517	0.229151	TRUE	<-3 in 3 replicates
ADAM9	8754	-3.7349	-2.46007	-3.38167	-5.36296	-1.5213	0.352811	-0.226402	-4.6903	-0.857599	-1.51948	0.39526	-1.44858	4.61172	-0.266285	13.6101	0.491306	TRUE	<-3 in 2 replicates | <-2 in all replicates
ADAMTS3	9508	-1.73062	-2.38434	-2.01553	-0.791998	-0.122949	0.61223	0.471672	-1.45275	-1.28507	-1.65359	-1.15903	-1.04259	0.936934	-0.444557	3.72306	-0.467705	TRUE	no hit
ADCK2	90956	-5.05447	-4.64122	-4.9343	-5.58789	-4.64974	-1.48388	-3.08473	-9.38061	-1.19442	-1.89428	-0.270194	-1.41878	5.91248	0.706283	16.3568	0.674393	TRUE	toxic
ADGRA1	84435	-1.62544	-2.72325	-1.57185	-0.581209	1.70918	1.45794	1.69802	1.97159	-0.359204	-1.32877	0.543286	-0.29213	2.83091	-0.00117231	8.19003	0.30386	TRUE	no hit
ADGRF3	165082	-3.30832	-3.53358	-1.3097	-5.08167	-1.58136	-0.0103768	-0.811276	-3.92242	-1.56436	-2.32528	-0.829088	-1.53869	0.786923	-0.494871	2.59256	0.263082	TRUE	no hit
ADGRV1	84059	-1.98164	-1.86875	-0.997624	-3.07854	-0.610343	0.632984	-0.160368	-2.30365	-1.3478	-1.78934	-0.868572	-1.38549	0.169461	-0.904404	1.57014	-0.157351	TRUE	no hit
ADK	132	-1.75077	-1.62511	-1.26694	-2.36026	0.702005	0.970229	0.782975	0.352811	-0.718969	-1.17868	-0.250134	-0.728094	1.48455	-0.477724	4.58613	0.345248	TRUE	no hit
ADRA2C	152	-2.7209	-2.94316	-1.84269	-3.37685	-0.162255	0.830142	0.198102	-1.51501	-1.1728	-1.67165	-0.803234	-1.04351	1.37635	-0.261807	4.11794	0.272901	TRUE	no hit
AGBL1	123624	-4.0066	-2.85779	-2.40524	-6.75677	0.476074	1.34898	0.349037	-0.269796	-0.898342	-1.09412	-0.434859	-1.16605	2.9543	0.297567	7.35197	1.21336	TRUE	no hit
A2M	2	0.920663	-0.197815	0.74913	2.21067	0.785019	0.409883	0.160368	1.78481	-0.362122	-0.283161	-0.506009	-0.297195	-0.754006	-0.300071	-1.52493	-0.437019	FALSE	no hit
ABAT	18	1.77069	0.666654	0.506264	4.13916	4.27822	0.441013	9.1976	3.19605	-0.380391	-0.564289	-0.448626	-0.12826	-0.90074	-0.967505	-0.951838	-0.782877	FALSE	no hit
ABCB10	23456	-0.833168	-1.84773	-1.35444	0.702672	-0.560032	-0.0518839	0.0943344	-1.72255	-1.05433	-1.59012	-0.774298	-0.798568	0.671706	-0.546592	3.1458	-0.584089	TRUE	no hit
ABCC4	10257	0.298333	0.0283223	-0.503683	1.37036	0.574339	0.202347	0.254703	1.26597	-0.52409	-0.745986	-0.249011	-0.577272	0.276452	-0.942332	2.32427	-0.552579	TRUE	no hit
ABCG2	9429	0.640139	-1.04178	-1.27864	4.24084	1.221	1.08956	1.34898	1.22446	-0.124015	-0.663362	0.148013	0.143305	1.81346	-0.320536	6.26341	-0.502506	TRUE	no hit
ABHD6	57406	0.686354	-0.652509	0.781089	1.93048	1.53419	1.17258	1.18861	2.24138	-0.618826	-1.30391	-0.157499	-0.395073	-0.698272	-1.0675	-0.595614	-0.431703	FALSE	no hit
ACADSB	36	-1.49194	-2.46825	-0.89685	-1.11074	-1.01441	-0.352811	-1.11315	-1.57727	-1.49725	-2.09947	-1.45503	-0.937265	-0.501463	-0.659447	-0.671765	-0.173176	FALSE	no hit
ACO2	50	0.780203	-0.461827	0.435646	2.36679	2.04863	1.31785	1.83952	2.98851	-0.257195	-0.915311	0.3815	-0.237775	0.217253	-0.870557	1.96308	-0.440766	TRUE	no hit
ACRV1	56	-0.611565	-1.64838	-0.486978	0.300663	-0.0808131	-0.0726375	-0.377337	0.207536	-0.815354	-1.77027	-0.0822724	-0.593515	0.707781	-1.01968	3.39527	-0.252251	TRUE	no hit
ACTG2	72	-0.429718	-1.17545	-0.722559	0.608857	1.24616	4.32712	-0.547139	-0.0415071	-0.990131	-1.55337	-0.711035	-0.705989	-0.0019223	-1.00232	1.50055	-0.503991	FALSE	no hit
ACVR2A	92	-0.95872	-1.98178	-0.197439	-0.696937	-0.461767	-0.0985794	-0.415071	-0.87165	-1.46785	-2.43265	-0.715207	-1.25569	-0.643221	-1.37529	0.161364	-0.715735	FALSE	no hit
ADAM18	8749	0.000139844	-0.90037	-2.19398	3.09477	-0.194014	1.00655	0.113201	-1.70179	-0.7759	-1.69609	-0.219706	-0.411905	1.79042	-1.35237	7.50831	-0.784687	TRUE	no hit
ADAMDEC1	27299	-1.6923	-1.34855	-2.5394	-1.18896	-0.824325	1.01174	-0.641474	-2.84324	-0.538903	-1.54944	0.379022	-0.446289	3.43888	-0.999366	10.9468	0.369256	TRUE	no hit
ADAMTS4	9507	-3.71249	-3.62504	-3.17347	-4.33897	-4.96293	-1.50463	-3.96204	-9.42212	-2.0896	-3.12263	-1.51659	-1.62959	1.81404	-1.16487	6.63708	-0.0301026	TRUE	toxic
ADCK5	203054	-1.08767	-0.608765	-1.43488	-1.21936	1.1938	1.03249	1.38672	1.1622	-0.256526	-1.43646	1.36501	-0.698131	3.25751	-1.22119	10.9375	0.0562465	TRUE	no hit
ADGRA2	25960	-2.23799	-1.45385	-1.90208	-3.35803	-0.93957	0.684868	0.27357	-3.77715	-0.967239	-1.93021	0.108053	-1.07956	2.22861	-1.29517	7.63844	0.342564	TRUE	no hit
ADGRF4	221393	-1.50696	-2.23116	-0.725416	-1.56429	0.409097	1.17258	0.90561	-0.850896	-1.25292	-2.58727	-0.0747166	-1.09679	0.601185	-1.47688	3.59413	-0.313699	TRUE	no hit
ADH1A	124	-2.04461	-2.57603	-1.59454	-1.96325	-1.42634	0.394318	0.0377337	-4.71106	-1.58126	-2.33913	-1.08492	-1.31973	0.418192	-1.08011	2.77663	-0.441943	TRUE	no hit
ADM	133	-2.79894	-2.68337	-1.84045	-3.87299	-0.429379	0.990983	0.481105	-2.76022	-1.25704	-1.94212	-0.428086	-1.40092	1.75538	-0.616908	5.84855	0.0344936	TRUE	no hit
ADRB1	153	-2.76038	-2.40044	-1.89257	-3.98813	-1.0056	0.87165	0.179235	-4.0677	-1.42854	-1.93115	-1.1749	-1.17957	0.831677	-0.787188	2.91615	0.366073	TRUE	no hit
AGBL2	79841	-2.23751	-1.36045	-0.0226384	-5.32945	-0.387871	0.949475	0.792409	-2.9055	-0.711821	-1.38193	0.593409	-1.34694	1.31093	-0.86432	4.24893	0.548162	TRUE	no hit
A2ML1	144568	0.0443075	-0.865781	0.71363	0.285073	0.648234	1.04287	1.46218	-0.560346	-0.302468	-0.0873083	-0.225006	-0.595091	-0.172099	0.277044	-0.534701	-0.258641	FALSE	no hit
ABCA1	19	1.40259	1.34873	-0.303241	3.1623	3.93123	1.45275	9.38627	0.954664	-0.0912224	0.198649	-0.512768	0.0404518	0.0300741	-0.709217	1.1568	-0.357365	TRUE	no hit
ABCB11	8647	-0.704659	-2.4826	-0.620091	0.988717	0.635499	0.508462	0.235836	1.1622	-0.879901	-1.75652	-0.339532	-0.543654	0.557125	-0.595107	2.6621	-0.395613	TRUE	no hit
ABCC5	10057	0.184947	-1.62343	-0.000974903	2.17924	0.430479	1.23484	0.782975	-0.726375	-0.490789	-1.17215	0.03002	-0.330236	0.446171	-0.441353	2.23984	-0.459976	TRUE	no hit
ABCG4	64137	-0.893386	-1.01273	-1.63186	-0.0355673	-1.90744	-0.311303	-0.782975	-4.62804	-0.692375	-1.46701	-0.0957495	-0.514366	1.98624	-0.964337	6.90525	0.0178074	TRUE	no hit
ABHD8	79575	-0.504604	-1.88546	0.0117909	0.35986	-1.25606	0.171217	-1.07541	-2.86399	-1.16061	-1.94424	-0.80713	-0.730468	-0.732757	-1.05815	-0.78592	-0.354201	FALSE	no hit
ACAN	176	-0.904982	-0.844981	0.157138	-2.0271	-0.234735	0.980606	0.349037	-2.03385	-0.882895	-1.39792	-0.392038	-0.858725	-0.270366	-1.06933	0.156559	0.101669	FALSE	no hit
ACOT11	26027	-0.860066	-0.970599	-0.636361	-0.973238	-1.26471	0.166028	0.377337	-4.33749	-0.836192	-1.08363	-0.398202	-1.02674	0.498673	-0.718258	2.68139	-0.467116	TRUE	no hit
ACSBG1	23205	1.24067	0.698091	0.246241	2.77766	0.0191813	0.944287	0.254703	-1.14145	-0.750197	-1.2072	-0.57483	-0.46856	-1.0412	-1.69207	-0.633403	-0.798132	FALSE	no hit
ACTN1	87	0.383926	-1.12818	0.0664989	2.21345	2.66557	6.09117	0.764108	1.14145	-0.313847	-1.18151	0.543741	-0.303776	0.874497	-0.729567	3.86692	-0.513865	TRUE	no hit
ACVR2B	93	-0.413678	-0.912896	-0.389924	0.0617844	-0.661913	0.695244	0.141502	-2.82248	-1.10768	-1.23346	-0.917827	-1.17175	-0.514953	-0.785894	0.0878679	-0.846834	FALSE	no hit
ADAM19	8728	-0.222075	-0.686643	0.725074	-0.704655	0.48991	0.954664	1.38672	-0.87165	-0.45439	-1.26664	0.738027	-0.834558	0.438843	-0.997589	2.54171	-0.227593	TRUE	no hit
ADAMTS1	9510	-1.53767	-2.26954	-2.02403	-0.319437	-0.227346	0.632984	0.698074	-2.0131	-0.597474	-1.56034	0.507853	-0.739933	2.98841	-0.480345	9.71345	-0.267878	TRUE	no hit
ADAMTS5	11096	-0.172848	-1.0861	-0.813981	1.38154	0.133955	1.30747	0.858443	-1.76405	-0.955525	-1.67446	-0.312383	-0.879737	0.315041	-1.22115	3.02174	-0.855477	TRUE	no hit
ADCY1	107	-2.69994	-1.06482	-2.85103	-4.18397	-0.42702	0.87165	0.254703	-2.40741	-0.445565	-1.09421	0.838388	-1.08087	4.46147	-0.666408	13.5112	0.539587	TRUE	no hit
ADGRA3	166647	-0.353367	0.497355	-0.646811	-0.910643	0.648077	1.17258	1.31125	-0.539593	-0.420333	-1.26712	0.766537	-0.760421	1.52396	-1.57043	6.26294	-0.120637	TRUE	no hit
ADGRF5	221395	-1.04499	-0.237609	-1.47638	-1.421	2.08935	2.31921	2.33006	1.61878	-0.686491	-1.50903	0.0925039	-0.642949	1.70959	-1.5119	6.39618	0.244476	TRUE	no hit
ADH1B	125	-1.02033	-1.71191	-0.516718	-0.832359	-0.790679	1.00136	0.839576	-4.21297	-1.34822	-2.60626	-0.545892	-0.892504	-0.1392	-1.75951	1.59647	-0.254565	FALSE	no hit
ADM2	79924	-3.42752	-1.64027	-2.45218	-6.19012	-2.85126	-0.171217	-1.26408	-7.11847	-1.54471	-2.18476	-0.691391	-1.75799	1.82091	-1.4266	6.55943	0.329896	TRUE	no hit
ADRB2	154	-1.15818	-1.75185	-1.88244	0.159754	0.537077	1.32823	0.90561	-0.622607	-0.982583	-1.67211	-0.905679	-0.369963	1.00898	-0.88977	3.85936	0.0573489	TRUE	no hit
AGBL3	340351	-3.44072	-1.89439	-1.97957	-6.44821	-1.34364	0.197159	-0.264136	-3.96393	-1.04396	-1.88811	0.304744	-1.54852	2.91009	-0.995609	9.0688	0.657082	TRUE	no hit
A4GALT	53947	0.186885	0.16496	-0.167416	0.563111	-1.2416	-1.21927	-1.61312	-0.892403	-0.526149	-0.207708	-0.962297	-0.408442	-0.400515	-0.34148	-0.779846	-0.0802194	FALSE	no hit
ABCA10	10349	0.682506	0.10334	-0.221219	2.1654	1.88559	-0.524027	6.57511	-0.394318	-0.825666	-0.978763	-1.21763	-0.280599	-0.990298	-1.00839	-1.55288	-0.409622	FALSE	no hit
ABCB4	5244	0.270501	-0.586153	-0.788063	2.18572	0.905924	0.217912	0.528272	1.97159	-0.578831	-0.951575	-0.551783	-0.233137	0.459558	-0.751431	2.5407	-0.410598	TRUE	no hit
ABCC6	368	0.412639	-1.13606	-0.199048	2.57302	-0.295738	-0.389129	0.311303	-0.809389	-0.382495	-1.5117	0.235192	0.12902	0.785403	-1.02908	3.47766	-0.0923767	TRUE	no hit
ABCG5	64240	-0.457909	-0.50092	-0.315563	-0.557245	-0.519468	-0.0622607	-0.292437	-1.20371	-0.365463	-0.845547	0.0609418	-0.311784	0.8606	-0.765447	3.08892	0.258327	TRUE	no hit
ABI1	10006	1.40118	1.43542	0.245038	2.52308	2.13133	1.4735	2.16026	2.76022	-0.802902	-0.8773	-0.973542	-0.557865	-1.50557	-1.65559	-1.98813	-0.872993	FALSE	no hit
ACAT1	38	-0.806122	-1.31949	-2.12885	1.02998	0.0471672	0.332057	-0.377337	0.186782	-1.35961	-1.87805	-1.63027	-0.570518	0.0907104	-1.26728	1.96408	-0.424676	TRUE	no hit
ACOT13	55856	0.284784	-0.0306462	-0.574592	1.45959	-0.279859	-0.373564	0.30187	-0.767882	-0.420815	-0.846934	0.146692	-0.562202	0.976776	-0.953402	4.44852	-0.564786	TRUE	no hit
ACSL1	2180	0.644645	-0.763677	-0.849081	3.54669	0.26225	0.726375	0.537706	-0.477332	-0.798508	-1.56837	-0.407216	-0.419944	0.253737	-1.31838	3.07035	-0.990759	TRUE	no hit
ACTN2	88	0.512053	-0.515726	-0.299461	2.35135	0.736751	4.11958	-0.311303	-1.59802	-0.814263	-1.13981	-0.862608	-0.440374	-0.66475	-0.990189	-0.357984	-0.646076	FALSE	no hit
ACVRL1	94	0.0115118	-1.94376	0.0785006	1.8998	0.651064	-0.939099	1.58482	1.30747	-1.27676	-2.63667	-0.602169	-0.591458	-0.594135	-1.50651	0.400522	-0.676419	FALSE	no hit
ADAM2	2515	0.300137	0.0367383	-0.784089	1.64776	1.55463	2.19988	1.30181	1.1622	-0.424619	-0.916622	-0.00930406	-0.347932	0.844521	-1.14423	4.03192	-0.354128	TRUE	no hit
ADAMTS10	81794	0.789483	1.01635	-0.661172	2.01327	3.54634	2.71872	2.8772	5.04312	0.475469	-0.0110482	1.33121	0.106241	2.48074	-0.829255	8.29504	-0.0235695	FALSE	no hit
ADAMTS6	11174	-0.896533	-0.38792	-1.28207	-1.01961	0.0704363	1.84707	0.27357	-1.90933	-1.32921	-1.38288	-1.29289	-1.31186	-0.447576	-1.33575	0.755788	-0.762766	FALSE	no hit
ADCY10	55811	-0.893099	-0.673676	-2.41049	0.404866	-0.615375	1.0273	0.509406	-3.38283	-0.331725	-0.877638	0.651827	-0.769366	3.34073	-0.790045	11.3005	-0.488254	TRUE	no hit
ADGRB1	575	-1.45983	-0.445619	-1.84983	-2.08403	-0.572295	1.07919	0.87731	-3.67338	-0.618148	-0.998439	0.193132	-1.04914	2.19173	-0.917703	7.62023	-0.127333	TRUE	no hit
ADGRG1	9289	-1.42258	-0.181813	-1.6319	-2.45402	-0.74587	1.20371	0.27357	-3.71489	-1.03821	-1.49334	-0.50228	-1.11902	1.06424	-1.48627	4.75684	-0.0778449	TRUE	no hit
ADH1C	126	-0.991586	0.044596	-0.634345	-2.38501	0.438812	1.54095	1.51878	-1.7433	-1.00051	-1.33174	-0.67908	-0.990706	-0.141753	-1.50966	1.04061	0.0437858	FALSE	no hit
ADNP	23394	-0.514885	1.11913	-0.206176	-2.45761	-0.0278286	0.876838	1.09428	-2.0546	-0.0348314	-0.66156	1.11711	-0.560045	1.85871	-1.42301	6.44579	0.553347	TRUE	no hit
ADRB3	155	-2.04112	-1.0114	-1.40935	-3.7026	0.353911	0.959852	1.78292	-1.68104	-0.863496	-1.53531	-0.108353	-0.946823	1.71136	-1.17689	5.83009	0.480865	TRUE	no hit
AGBL4	84871	-2.09446	-1.19786	-1.17392	-3.91159	-0.464597	0.990983	0.188669	-2.57344	-0.488585	-0.994801	0.348821	-0.819773	2.16862	-0.611841	6.41622	0.701491	TRUE	no hit
AADAC	13	0.589458	-0.0378863	0.408019	1.39824	0.93281	0.721186	0.499972	1.57727	-0.374795	-0.134405	-0.601285	-0.388695	-0.584255	-0.282284	-1.14484	-0.325642	FALSE	no hit
ABCA12	26154	-0.670082	-0.657215	-0.776663	-0.576369	1.87128	0.799012	6.95244	-2.13762	-0.938923	-0.902073	-0.943613	-0.971084	-0.0574366	-0.749987	1.02742	-0.449747	FALSE	no hit
ABCB5	340273	-0.32324	0.286775	-0.358208	-0.898289	-1.03784	0.378753	0.471672	-3.96393	-0.367274	-0.3984	-0.0786195	-0.624802	0.662011	-0.688508	2.59142	0.0831163	TRUE	no hit
ABCC8	6833	-2.84063	-3.13311	-1.5306	-3.85819	-1.64959	0.0415071	-0.735808	-4.25448	-1.31125	-1.6588	-0.923854	-1.3511	0.972911	-0.0849315	3.01722	-0.0135533	TRUE	no hit
ABCG8	64241	-0.424639	0.116384	-1.61027	0.219967	0.204706	0.799012	1.01881	-1.20371	-0.441532	-0.351281	-0.367857	-0.605458	1.49012	-0.62801	5.38129	-0.282928	TRUE	no hit
ABI3BP	25890	-1.00504	-0.505085	-0.594141	-1.9159	0.211938	0.726375	0.386771	-0.477332	-1.22761	-1.2831	-1.32542	-1.0743	-0.771097	-1.09713	-1.08569	-0.130475	FALSE	no hit
ACAT2	39	0.468539	1.66687	-0.331026	0.0697759	-0.105654	1.03768	0.367904	-1.72255	-0.488461	-0.32992	-0.338583	-0.796879	0.011383	-1.36854	1.86471	-0.462019	TRUE	no hit
ACOT2	10965	-3.0358	-2.74658	-3.37	-2.99081	-1.06063	0.217912	0.27357	-3.67338	-1.1973	-1.86648	-0.439532	-1.28589	3.20951	-0.485601	10.2376	-0.123496	TRUE	no hit
ACSL3	2181	-1.8001	-1.48827	-2.49445	-1.41759	-2.31324	-0.0363187	-1.42445	-5.47894	-1.31017	-1.38356	-1.36328	-1.18369	1.13356	-0.659681	4.38553	-0.325173	TRUE	no hit
ACTN3	89	-0.13372	-0.926297	-1.41116	1.93629	1.46313	5.05349	0.518839	-1.18295	-0.727622	-0.93139	-0.480155	-0.77132	0.912717	-0.59646	4.27	-0.93539	TRUE	no hit
ACY1	95	-1.1718	-1.48868	-0.916947	-1.10978	-1.07337	0.285361	0.0849009	-3.59037	-1.24552	-1.66319	-0.979845	-1.09353	-0.0189202	-1.00042	1.37178	-0.428124	FALSE	no hit
ADAM20	8748	-0.23067	-0.0446589	-0.908692	0.261342	-0.81332	0.710809	-0.245269	-2.9055	-0.761543	-1.16446	-0.432177	-0.687995	0.353338	-1.31741	2.72448	-0.347059	TRUE	no hit
ADAMTS12	81792	-0.936281	-0.932713	-1.50736	-0.368767	0.406738	1.04287	1.13201	-0.954664	-0.0955055	-0.845314	0.788117	-0.22932	2.96724	-0.498887	9.04721	0.353401	TRUE	no hit
ADAMTS7	11173	-0.975771	-1.14235	-1.64338	-0.141581	-1.76578	0.140087	-0.830142	-4.60729	-1.32863	-1.95479	-1.04962	-0.981481	0.686378	-1.43253	3.79695	-0.305283	TRUE	no hit
ADCY2	108	-0.529877	-0.0832149	-2.20026	0.69384	0.410512	0.980606	1.53765	-1.28672	0.15484	-0.661695	1.31802	-0.19181	4.0968	-0.838397	13.0653	0.0635476	FALSE	no hit
ADGRB2	576	-0.987319	0.206371	-1.21288	-1.95545	-0.285361	1.05324	0.518839	-2.42817	-0.3051	-0.843025	0.676241	-0.748515	2.24703	-1.09367	7.59848	0.236261	TRUE	no hit
ADGRG2	10149	-2.99799	-1.95036	-2.32947	-4.71414	-1.05513	0.306115	0.471672	-3.94318	-1.24173	-1.62651	-0.802303	-1.29639	2.03113	-0.61847	6.00847	0.703377	TRUE	no hit
ADH4	127	-0.840616	-0.578296	0.00192313	-1.94547	1.43844	1.84188	2.03762	0.435825	-0.227766	-1.16418	0.777019	-0.29614	1.5335	-0.946676	4.82434	0.722847	TRUE	no hit
ADORA1	134	-4.05622	-3.21085	-4.07124	-4.88656	-3.49918	-0.850896	-2.11309	-7.53354	-1.5779	-2.25782	-1.12833	-1.34755	3.40146	-0.588707	10.3204	0.47267	TRUE	<-3 in 3 replicates
ADSS	159	-2.05843	-0.497797	-2.17728	-3.50021	-2.10397	0.176405	-1.42445	-5.06387	-1.00931	-0.952964	-0.965715	-1.10926	1.30926	-0.875743	4.54414	0.259399	TRUE	no hit
AGBL5	60509	-1.80889	-1.74738	-0.760025	-2.91925	-0.386771	0.975417	-0.122635	-2.0131	0.101553	-0.963313	1.74749	-0.479515	3.82394	-0.1996	10.8899	0.781542	FALSE	no hit
AADACL2	344752	-0.107883	-0.0211388	-1.14664	0.84413	1.34914	-0.337245	0.254703	4.12996	-0.768823	-0.887389	-1.23929	-0.179794	0.0525513	-0.936138	1.05015	0.043641	TRUE	no hit
ABCA13	154664	-1.24337	-0.631405	-1.79172	-1.307	1.3515	-0.726375	6.4619	-1.68104	-0.999842	-0.619796	-1.34865	-1.03108	0.583094	-0.340221	2.37336	-0.283852	TRUE	no hit
ABCB6	10058	-3.0605	-3.6734	-3.26935	-2.23875	1.33515	0.539593	1.03768	2.42817	-2.80336	-3.68668	-3.00549	-1.7179	-0.894829	-1.81492	-0.0104282	-0.859139	FALSE	<-3 in 2 replicates | <-2 in all replicates
ABCC9	10060	-0.0561637	-1.18834	-0.612328	1.63218	1.92253	0.87165	1.16031	3.73564	-0.753439	-1.52358	-0.469818	-0.266917	0.287749	-1.02055	2.17475	-0.290956	TRUE	no hit
ABHD10	55347	-0.286389	-0.637618	-1.38813	1.16658	1.24003	0.939099	1.66028	1.12069	-0.327211	-0.408927	-0.296885	-0.275821	1.52075	-0.268082	4.94766	-0.117323	TRUE	no hit
ABL1	25	-0.690143	-1.44908	-0.697706	0.0763547	0.562076	0.835331	0.93391	-0.0830142	-1.20259	-1.83292	-1.22876	-0.546083	-0.541142	-1.10873	-0.371334	-0.143364	FALSE	no hit
ACCS	84680	0.0701579	-0.139266	-1.70936	2.0591	1.0707	0.695244	1.08485	1.432	-1.17375	-1.40744	-1.42139	-0.692415	-0.154799	-1.39031	1.80327	-0.877363	FALSE	no hit
ACOT7	11332	-0.491524	-0.802305	-1.06283	0.390562	2.58115	1.03249	1.68859	5.02236	-0.777532	-1.60328	-0.0139639	-0.71535	1.04874	-1.33135	4.90521	-0.427639	TRUE	no hit
ACSL4	2182	-0.80961	-0.541111	-1.68988	-0.19784	0.0965355	0.446202	0.320737	-0.477332	-1.01002	-1.14915	-0.850737	-1.03019	0.654041	-0.9409	3.51643	-0.613407	TRUE	no hit
ACTN4	81	0.863525	1.22393	-0.380366	1.74701	3.34069	6.24682	0.952777	2.82248	-0.445396	-0.770475	-0.21538	-0.350333	0.0992293	-1.52847	2.22548	-0.399323	TRUE	no hit
ACY3	91703	-0.527601	-0.383328	-1.08079	-0.118683	1.83952	0.601853	1.99046	2.92625	-1.52135	-1.93675	-1.76306	-0.864242	-1.1917	-1.84574	-1.25808	-0.471296	FALSE	no hit
ADAM22	53616	-3.6295	-3.88023	-3.2349	-3.77339	-2.78569	-0.695244	-0.688641	-6.9732	-1.87333	-2.49875	-1.485	-1.63625	1.85613	-0.44894	6.25399	-0.236663	TRUE	<-3 in 3 replicates
ADAMTS13	11093	-0.879673	0.154185	-0.650677	-2.14253	0.628267	0.93391	1.17918	-0.228289	-0.438421	-1.1802	0.52146	-0.656526	1.44052	-1.3948	5.36227	0.354076	TRUE	no hit
ADAMTS8	11095	-0.880037	0.195649	-0.779456	-2.0563	1.32162	1.56689	2.37723	0.0207536	-1.00467	-1.38958	-0.449909	-1.1745	0.233289	-1.54017	2.46044	-0.220405	TRUE	no hit
ADCY3	109	-2.40499	-1.59578	-2.43148	-3.18772	-1.43828	0.705621	0.0849009	-5.10538	-0.869031	-1.74099	0.334374	-1.20048	3.20299	-1.04774	10.5846	0.0721092	TRUE	no hit
ADGRB3	577	-2.5869	-2.01604	-2.61974	-3.1249	-0.516323	0.352811	-0.0754675	-1.82631	-1.1161	-1.77755	-0.652395	-0.918359	2.25754	-0.852101	7.21032	0.414412	TRUE	no hit
ADGRG3	222487	-2.19687	-1.91177	-1.3793	-3.29955	-0.646819	0.61223	0.726375	-3.27906	-1.30698	-1.85312	-0.654759	-1.41306	0.79194	-0.968949	3.49635	-0.151586	TRUE	no hit
ADH5	128	-2.5142	-1.71261	-2.64701	-3.18297	-0.289449	0.752317	1.05654	-2.67721	-1.50651	-1.97021	-1.48514	-1.06418	1.03769	-1.06419	3.98977	0.187478	TRUE	no hit
ADORA2A	135	-1.60528	-1.31635	-1.46038	-2.0391	0.0731091	1.09475	1.28295	-2.15837	-0.700207	-1.34319	-0.0218527	-0.735578	1.80196	-0.859127	6.02768	0.237332	TRUE	no hit
ADSSL1	122622	-2.49924	-1.33395	-1.78871	-4.37505	-1.22477	0.487709	0.00943344	-4.17147	-1.15262	-2.04201	-0.596719	-0.819113	1.55196	-1.44411	5.25533	0.844665	TRUE	no hit
AGER	177	-5.9607	-4.67356	-4.59566	-8.6129	-5.45206	-1.84188	-3.76394	-10.7503	-2.05038	-2.51717	-1.48888	-2.14508	3.99334	0.0829599	11.1705	0.726618	TRUE	toxic
AADAT	51166	-1.90199	-2.1397	-2.23371	-1.33257	-2.26497	-0.591477	-1.47162	-4.73181	-0.889935	-0.883286	-1.59009	-0.196427	1.44528	0.225209	3.19331	0.917309	TRUE	no hit
ABCA2	20	-1.54175	-1.98582	-1.63807	-1.00136	-1.77113	-0.866461	2.6508	-7.09772	-0.971468	-0.744105	-1.12687	-1.04343	1.1004	0.29736	3.41875	-0.414905	TRUE	no hit
ABCB7	22	-0.441747	-1.22517	-1.65983	1.55976	-1.11173	-0.00518839	0.613173	-3.94318	-0.840471	-0.887096	-1.12127	-0.51305	0.650278	-0.323411	2.7912	-0.516952	TRUE	no hit
ABCD1	215	-1.39149	-1.99947	-1.26133	-0.913661	-2.10476	-0.12971	-1.03768	-5.14688	-0.779911	-1.02366	-0.323328	-0.992748	1.40174	-0.0653761	4.61859	-0.347996	TRUE	no hit
ABHD12	26090	-1.02119	-1.18575	-1.18891	-0.688923	-0.0893032	0.684868	0.707508	-1.66028	-0.533673	-0.862187	-0.113198	-0.625633	1.47404	-0.368265	4.74774	0.0426355	TRUE	no hit
ABL2	27	-1.83446	-1.98706	-1.32036	-2.19596	-1.41785	0.342434	-0.424505	-4.17147	-1.49446	-1.75972	-1.09217	-1.6315	0.247932	-0.783526	2.20758	-0.680261	TRUE	no hit
ACE	1636	-3.20654	-2.72735	-3.71988	-3.17239	-3.50735	-0.850896	-3.00927	-6.66189	-1.83268	-1.61302	-2.20669	-1.67834	1.6924	-0.108074	5.62285	-0.43758	TRUE	toxic
ACOX1	51	-3.42446	-2.97262	-3.47659	-3.82416	-2.20192	-0.223101	-1.33955	-5.04312	-1.60252	-1.64908	-1.46191	-1.69657	2.24323	-0.0737874	7.07133	-0.26786	TRUE	<-3 in 2 replicates | <-2 in all replicates
ACSM1	116285	-1.14991	0.768697	-1.28836	-2.93005	0.292908	1.04287	1.64142	-1.80556	-0.921121	-0.750394	-0.675004	-1.33796	0.548252	-1.30844	3.08069	-0.12749	TRUE	no hit
ACTR1A	10121	-1.20889	-1.16982	-2.29484	-0.162002	0.922276	5.3648	-0.377337	-2.22063	-1.10474	-1.24263	-1.30946	-0.762144	0.897143	-0.739241	3.78666	-0.355988	TRUE	no hit
ACYP1	97	-1.34169	-0.793297	-0.597881	-2.63389	-0.441957	0.907968	0.0283003	-2.26214	-1.43582	-1.58266	-1.45565	-1.26915	-0.882417	-1.28758	-1.23813	-0.121536	FALSE	no hit
ADAM23	8745	-2.76869	-2.88239	-2.23359	-3.19009	-2.08369	0.212724	-0.320737	-6.14305	-1.49617	-1.58803	-1.0104	-1.89008	1.33971	-0.180451	4.89562	-0.696028	TRUE	no hit
ADAMTS14	140766	-1.2491	-1.58068	-1.58521	-0.581402	0.464282	1.17776	0.650907	-0.435825	-0.342418	-0.674377	0.16013	-0.513008	2.29877	-0.0440732	6.92127	0.0191089	TRUE	no hit
ADAMTS9	56999	-3.22324	-1.87087	-1.72608	-6.07276	-2.27755	-0.280173	-1.71689	-4.83558	-1.82454	-1.58477	-2.0207	-1.86814	-0.284985	-0.707249	-0.327362	0.179655	FALSE	no hit
ADCY4	196883	-2.46931	-1.14324	-2.9415	-3.32319	-1.55416	-0.119333	-0.226402	-4.31674	-0.615955	-1.38711	0.13213	-0.592886	3.71444	-0.920272	11.2906	0.773022	TRUE	no hit
ADGRD1	283383	-1.05297	-0.756033	-0.419166	-1.98372	0.704521	1.17776	2.6791	-1.7433	-0.0874309	-0.801312	1.22108	-0.682059	2.66963	-0.586043	8.31764	0.277284	TRUE	no hit
ADGRG4	139378	-1.97909	-1.08445	-1.88281	-2.97002	-0.539435	0.762693	0.462238	-2.84324	-1.28611	-1.89979	-0.946277	-1.01227	0.874289	-1.45754	3.82054	0.25987	TRUE	no hit
ADH6	130	-1.81509	-1.3566	-1.85678	-2.23189	-0.893189	0.669302	0.386771	-3.73564	-1.36842	-1.77858	-0.956628	-1.37005	0.784065	-1.14791	3.89075	-0.39065	TRUE	no hit
ADORA2B	136	-2.63568	-2.07383	-1.55406	-4.27914	-1.42917	0.674491	0.433938	-5.39593	-0.854321	-1.67841	0.0939637	-0.978515	2.21716	-0.722601	6.69564	0.678438	TRUE	no hit
AEBP1	165	-4.28098	-4.05606	-2.50865	-6.27824	-3.67385	-0.337245	-1.90555	-8.77876	-1.78099	-2.70061	-1.00589	-1.63647	1.91728	-0.642554	5.70495	0.689443	TRUE	<-3 in 2 replicates | <-2 in all replicates
AGGF1	55109	-3.11391	-2.21815	-2.4203	-4.70327	-1.67837	0.430636	0.283003	-5.74874	-0.814816	-1.34228	-0.0437629	-1.0584	3.12767	-0.343662	9.02418	0.702502	TRUE	no hit
AAK1	22848	0.137369	-0.243489	-0.284402	0.939998	0.264922	-0.212724	-0.735808	1.7433	-0.25892	-0.0853875	-0.42478	-0.266592	0.464265	0.00472398	1.42492	-0.0368529	TRUE	no hit
ABCA3	21	0.801359	-0.3737	-0.209237	2.98701	3.56018	0.892403	8.48066	1.30747	-0.546328	-0.45809	-0.790423	-0.39047	-0.437132	-0.376503	-0.186199	-0.748694	FALSE	no hit
ABCB8	11194	-1.69519	-1.80494	-2.91236	-0.368277	-3.08615	-1.77962	-3.2451	-4.23373	-1.24395	-1.44335	-1.54388	-0.744625	1.59536	-0.534246	5.27653	0.0437921	TRUE	toxic
ABCD2	225	-1.0922	-2.22841	-1.7942	0.746021	-1.0446	-0.767882	-0.830142	-1.53576	-1.04798	-1.56075	-1.0672	-0.515971	0.829121	-0.434385	3.23589	-0.314137	TRUE	no hit
ABHD14A	25864	-0.0808051	-1.6046	-1.53516	2.89735	1.0707	0.965041	1.08485	1.1622	-0.244285	-0.91177	0.238708	-0.0597937	2.11368	-0.229388	6.99129	-0.42087	TRUE	no hit
ABO	28	0.357933	-0.837963	-0.0477079	1.95947	1.8238	0.954664	1.63198	2.88475	-0.863897	-1.17936	-1.00758	-0.404758	-0.937245	-0.862797	-1.43466	-0.514279	FALSE	no hit
ACE2	59272	-0.579961	-2.23436	-1.54414	2.03862	0.503903	0.16084	0.396204	0.954664	-1.22497	-2.31454	-0.66694	-0.693414	0.779521	-1.17815	4.3756	-0.858884	TRUE	no hit
ACP1	52	0.0105793	-0.383207	-0.955883	1.37083	-0.303599	-0.150463	-0.386771	-0.373564	-0.657867	-1.23848	-0.278393	-0.456732	0.844692	-1.12471	4.06733	-0.408544	TRUE	no hit
ACSS1	84532	-1.05751	-0.925425	-0.814089	-1.43301	-0.575282	-0.357999	-0.122635	-1.24521	-0.864392	-1.19775	-0.301889	-1.09354	0.643063	-0.570947	2.84236	-0.342228	TRUE	no hit
ACTR1B	10120	-1.05194	-1.20089	-1.45876	-0.496168	1.99957	5.19877	0.820709	-0.0207536	-1.03351	-1.94531	-0.726453	-0.428764	0.780143	-1.38636	3.6174	0.109396	TRUE	no hit
ACYP2	98	-1.36903	-1.32069	-1.19676	-1.58965	-0.31036	0.529216	-0.132068	-1.32823	-1.39399	-1.79247	-1.15822	-1.23127	-0.129877	-1.11104	1.1619	-0.440486	FALSE	no hit
ADAM28	10863	-1.13266	-0.51041	-1.03378	-1.85381	0.492897	0.980606	1.24521	-0.747128	-0.78631	-1.18929	-0.0804325	-1.08921	1.39074	-1.07357	5.48558	-0.239798	TRUE	no hit
ADAMTS15	170689	-2.38838	-2.87461	-3.60219	-0.688338	-1.5573	-0.119333	-0.547139	-4.00544	-0.936014	-1.63978	-0.367136	-0.801129	3.61463	-0.273793	11.3753	-0.257645	TRUE	no hit
ADAMTSL1	92949	-1.71165	-1.77115	-1.01691	-2.3469	-1.1416	0.627795	0.160368	-4.21297	-1.12868	-1.78816	-0.256427	-1.34145	0.98934	-1.04335	4.30124	-0.289871	TRUE	no hit
ADCY5	111	-2.66185	-1.41718	-2.13258	-4.4358	-1.04507	0.534404	0.792409	-4.46202	-0.225917	-0.978058	1.53293	-1.23262	4.55738	-0.442407	13.737	0.37759	TRUE	no hit
ADGRD2	347088	-1.26355	-0.296444	-1.40809	-2.0861	-0.00518839	0.544781	1.86782	-2.42817	-0.558339	-1.05058	0.512955	-1.13739	2.18741	-1.0254	7.82562	-0.237998	TRUE	no hit
ADGRG5	221188	-2.16577	-2.25721	-1.78826	-2.45184	-0.206907	0.892403	1.64142	-3.15454	-1.03386	-1.58151	-0.467929	-1.05213	1.77796	-0.439587	5.69586	0.0776018	TRUE	no hit
ADH7	131	-2.60919	-2.24254	-1.12631	-4.45872	-1.33169	0.32168	0.103768	-4.42051	-1.609	-2.3437	-1.11186	-1.37145	0.0702234	-1.16725	1.05239	0.325526	TRUE	no hit
ADORA3	140	-2.03799	-1.25737	-1.96419	-2.89241	-1.18893	0.861273	-0.650907	-3.77715	-0.881092	-1.45912	-0.596445	-0.58771	1.70618	-0.923671	5.3494	0.692804	TRUE	no hit
AES	166	-2.82098	-1.96393	-2.45289	-4.04611	-0.0713797	0.819766	0.896177	-1.93008	-0.988298	-1.50216	-0.45164	-1.01109	2.55509	-0.581317	7.73413	0.512446	TRUE	no hit
AGMAT	79814	-3.56818	-1.46366	-3.35027	-5.8906	-1.16094	0.5811	-0.349037	-3.71489	-0.846063	-1.12495	-0.252657	-1.16058	3.81099	-0.548219	11.0542	0.926964	TRUE	no hit
AAMP	14	-2.01804	-2.25924	-2.44582	-1.34906	-1.68906	0.45139	-2.19799	-3.32057	-1.13868	-0.569939	-1.96934	-0.876769	0.953731	0.513911	2.35929	-0.0120102	TRUE	no hit
ABCA4	24	-0.563372	-0.297011	-1.16909	-0.224013	1.78937	0.389129	7.80145	-2.82248	-0.913833	-0.747284	-1.16033	-0.833886	-0.00820714	-0.757251	1.10421	-0.371576	FALSE	no hit
ABCB9	23457	-1.89934	-2.63258	-2.45487	-0.610575	-1.39804	0.0830142	-0.915043	-3.36208	-1.02558	-0.886042	-1.50889	-0.681798	1.38838	0.420786	3.84261	-0.0982494	TRUE	no hit
ABCD3	5825	-0.681779	-0.431518	-0.819192	-0.794628	-0.69037	0.409883	-0.405638	-2.07536	-0.41342	-0.30422	-0.255405	-0.680634	0.919573	-0.327289	3.10979	-0.0237793	TRUE	no hit
ABHD14B	84836	-1.88396	-3.7274	-1.92741	0.0029379	-0.863631	-0.140087	-0.499972	-1.95083	-0.228514	0.441227	-0.666336	-0.460434	2.47182	2.27489	5.17009	-0.0295157	TRUE	no hit
ACAA1	30	-1.4118	-2.18249	-1.04964	-1.00327	-1.03029	-0.181594	-0.169802	-2.73947	-1.34446	-1.81873	-1.27649	-0.938166	-0.193028	-0.693437	0.386432	-0.272078	FALSE	no hit
ACHE	43	-0.995841	-0.199401	-0.000481973	-2.78764	-1.52664	0.238666	-0.999944	-3.81866	-0.990398	-0.966022	-0.504246	-1.50093	-0.278514	-0.959636	0.436778	-0.312684	FALSE	no hit
ACP2	53	-2.27809	-2.13217	-2.1187	-2.5834	-0.989725	0.368376	-0.556573	-2.78098	-1.00988	-0.754145	-0.975274	-1.30022	1.50137	0.192193	4.52442	-0.212498	TRUE	no hit
ACSS2	55902	-1.96715	-1.61096	-1.29241	-2.99807	-0.939256	0.632984	-0.358471	-3.09228	-1.2901	-1.1858	-1.29752	-1.38697	0.0400955	-0.479941	0.779355	-0.179128	TRUE	no hit
ACTR2	10097	-1.17736	-0.571033	-1.02434	-1.9367	0.341962	4.11439	0.792409	-3.88092	-1.10624	-1.26792	-0.785317	-1.26548	0.144053	-1.10909	1.97294	-0.431692	TRUE	no hit
ADA	100	-0.681686	0.0164475	-0.46911	-1.5924	-0.178292	0.778259	0.264136	-1.57727	-1.10449	-1.26308	-0.956711	-1.09369	-0.527222	-1.37032	0.0153145	-0.226656	FALSE	no hit
ADAM29	11086	-2.06512	-1.06465	-2.27649	-2.85423	-0.464597	0.721186	0.707508	-2.82248	-1.15488	-1.47886	-0.917728	-1.06804	1.40861	-1.06426	5.21938	0.0707202	TRUE	no hit
ADAMTS16	170690	-5.34675	-4.6525	-4.76774	-6.62002	-6.27842	-2.09092	-4.18845	-12.5559	-1.84276	-2.37857	-1.29469	-1.85501	4.21927	0.185878	11.887	0.584906	TRUE	toxic
ADAMTSL2	9719	-0.419329	-0.720813	-0.580675	0.0435002	0.901679	0.856084	1.01881	0.830142	-0.959989	-1.5165	-0.665801	-0.697663	0.0445026	-1.21967	1.64805	-0.294876	TRUE	no hit
ADCY6	112	-3.13946	-2.82385	-3.07772	-3.51682	-1.39929	0.622607	-0.462238	-4.35825	-0.33261	-0.422251	0.380318	-0.955898	4.50959	0.77829	12.3214	0.429132	TRUE	<-3 in 2 replicates | <-2 in all replicates
ADGRE1	2015	-1.90692	-1.482	-1.78037	-2.45839	0.211938	1.72255	0.490539	-1.57727	-0.586929	-0.287218	-0.566587	-0.906982	1.76063	0.239916	4.99409	0.0478727	TRUE	no hit
ADGRG6	57211	-2.02327	-1.57548	-2.63085	-1.86347	-1.0512	0.653737	-0.113201	-3.69413	-1.29614	-1.25694	-1.7453	-0.886179	0.70652	-0.559945	2.64938	0.0301285	TRUE	no hit
ADHFE1	137872	-1.01447	-1.26825	-0.893638	-0.881532	0.374193	0.93391	0.915043	-0.726375	-0.851848	-1.50747	-0.270189	-0.777888	0.890859	-0.991959	3.74958	-0.0850447	TRUE	no hit
ADPGK	83440	-4.55618	-3.28507	-3.85524	-6.52824	-3.40217	-0.461767	-2.48099	-7.26375	-1.66128	-1.76643	-1.51923	-1.69819	2.76332	-0.0854915	7.8388	0.536638	TRUE	<-3 in 3 replicates
AFDN	4301	-2.79728	-2.61019	-3.1242	-2.65744	-0.721658	0.487709	0.688641	-3.34132	-1.27155	-1.7469	-1.20894	-0.858811	2.14674	-0.48833	6.56564	0.362917	TRUE	no hit
AGO2	27161	-3.26035	-1.68745	-3.27577	-4.81783	-1.26424	0.233478	0.103768	-4.12996	-0.655654	-0.820793	-0.685929	-0.46024	3.47338	-0.0707297	9.02669	1.46419	TRUE	no hit
AANAT	15	-2.49092	-2.63356	-2.31476	-2.52444	-1.99439	-0.887215	-1.13201	-3.96393	-0.953679	-0.870711	-1.36384	-0.626485	1.75236	0.520773	4.09839	0.637929	TRUE	no hit
ABCA5	23461	-0.0301278	-0.869777	-1.51361	2.29301	1.91672	-0.326869	7.19771	-1.12069	-0.704612	-0.647622	-1.02048	-0.445741	0.772682	-0.276941	3.24756	-0.652569	TRUE	no hit
ABCC1	4363	-0.372144	-1.7022	-0.806527	1.39229	0.669145	0.394318	-0.150935	1.76405	-0.529654	-1.00559	-0.326128	-0.257241	1.0274	-0.203737	3.5051	-0.219159	TRUE	no hit
ABCD4	5826	-0.232261	-1.62615	-0.696434	1.6258	1.0611	0.845708	1.21691	1.12069	-0.624236	-1.14777	-0.335639	-0.389298	0.602236	-0.483547	2.68288	-0.392628	TRUE	no hit
ABHD15	116236	-0.79403	-1.86387	-1.42133	0.903105	0.937841	0.0155652	1.17918	1.61878	-0.367522	-0.233042	-0.189958	-0.679567	1.85435	0.523448	5.52951	-0.489918	TRUE	no hit
ACAA2	10449	0.396846	-1.07781	-0.41732	2.68567	2.11718	0.632984	1.23578	4.48277	-0.930264	-1.48288	-0.857986	-0.449923	-0.566015	-1.06472	0.156238	-0.789562	FALSE	no hit
ACKR1	2532	-0.591614	-1.98579	-1.53073	1.74168	1.72097	0.404694	1.70745	3.05077	-0.607145	-1.32841	-0.222444	-0.270584	1.65975	-0.342747	5.64965	-0.32764	TRUE	no hit
ACP5	54	-0.377812	-0.74952	-0.680814	0.296899	0.389287	0.435825	0.462238	0.269796	-0.694505	-1.2333	-0.345282	-0.504936	0.487647	-1.01143	2.67226	-0.197887	TRUE	no hit
ACTA1	58	-0.887344	-0.776667	0.18038	-2.06574	1.1688	0.653737	1.25465	1.59802	-0.897662	-1.20959	-0.460022	-1.02337	-0.369507	-0.988706	-0.0198495	-0.0999656	FALSE	no hit
ACTR3	10096	-1.60745	-1.5804	-1.39447	-1.84747	0.484879	0.87165	0.60374	-0.0207536	-1.18736	-1.55672	-0.776871	-1.2285	0.481075	-0.837925	2.65847	-0.377323	TRUE	no hit
ADAL	161823	-2.16772	-3.0635	-2.50305	-0.936628	-2.61825	-0.596665	-1.61312	-5.64497	-1.81799	-2.19398	-1.95439	-1.3056	0.337777	-0.435912	2.12781	-0.678568	TRUE	no hit
ADAM30	11085	-1.55451	-0.579426	-1.47603	-2.60807	-1.11928	0.223101	0.320737	-3.90167	-0.922918	-1.53898	-0.00771139	-1.22206	1.52563	-1.38136	6.08339	-0.12515	TRUE	no hit
ADAMTS17	170691	-2.5716	-2.22981	-2.36151	-3.1235	-1.51501	0.249043	0.207536	-5.00161	-0.721443	-1.34466	0.0951058	-0.914773	3.07176	-0.338488	9.15827	0.395497	TRUE	no hit
ADAMTSL3	57188	-1.99891	-1.22231	-1.03869	-3.73572	-0.725589	0.534404	0.858443	-3.56961	-1.55284	-2.01669	-1.41248	-1.22934	-0.494839	-1.4642	-0.182588	0.162267	FALSE	no hit
ADCY7	113	-4.89074	-4.12462	-3.7833	-6.7643	-1.72585	0.357999	-0.160368	-5.37517	-0.509473	-0.748007	0.468133	-1.24854	5.81805	1.2022	15.046	1.20595	TRUE	<-3 in 3 replicates
ADGRE2	30817	-2.08062	-2.18059	-1.02204	-3.03923	0.0188669	1.07919	0.990511	-2.0131	-0.591613	-1.04654	-0.302527	-0.425769	1.49222	-0.0904596	3.6601	0.907007	TRUE	no hit
ADGRG7	84873	-2.38773	-1.57308	-1.69295	-3.89716	-0.786749	0.415071	0.773542	-3.54886	-1.19221	-2.11481	-0.0535343	-1.40829	1.75771	-1.41995	6.69144	0.00165481	TRUE	no hit
ADI1	55256	-3.61876	-2.44436	-1.92382	-6.48811	-2.5824	-0.389129	-1.13201	-6.22607	-1.47773	-2.11876	-0.681994	-1.63243	1.57065	-0.948865	5.0276	0.633219	TRUE	no hit
ADRA1A	148	-2.17365	-0.161612	-1.86289	-4.49644	0.0279859	1.2971	1.23578	-2.44892	-0.652829	-0.803065	-0.275889	-0.879532	1.99553	-0.91014	6.11022	0.786505	TRUE	no hit
AFG3L2	10939	-3.20917	-2.69312	-2.65703	-4.27736	-0.00361615	1.01174	0.679207	-1.70179	-1.09666	-1.82795	-0.380815	-1.0812	2.65885	-0.546437	7.99555	0.527431	TRUE	no hit
AGPAT2	10555	-3.83956	-4.39992	-3.08869	-4.03007	-1.34316	0.243854	0.188669	-4.46202	-0.832756	-1.88558	0.10427	-0.716959	4.26177	0.384482	11.4347	0.966137	TRUE	<-3 in 3 replicates
AARS	16	-0.588908	-3.25933	-1.71362	3.20623	-0.707822	0.300927	-0.971644	-1.45275	-0.584852	-0.243945	-1.70198	0.191368	0.656518	1.40259	0.700656	-0.133692	TRUE	no hit
ABCA6	23460	-0.856128	-0.684084	-1.50245	-0.381852	2.3854	1.1622	7.82032	-1.82631	-0.781843	-0.233143	-1.32553	-0.78686	0.33177	-0.139813	1.46751	-0.332387	TRUE	no hit
ABCC10	89845	-1.43147	-2.22638	-1.6712	-0.39684	0.577798	1.29191	0.773542	-0.332057	-0.708858	-0.627437	-0.861255	-0.637882	1.20451	0.378844	3.40116	-0.16649	TRUE	no hit
ABCE1	6059	-1.73083	-3.23217	-1.84383	-0.116474	-2.32707	-0.285361	-0.179235	-6.51662	-1.12419	-1.3452	-1.15415	-0.873204	1.03399	0.347841	3.12942	-0.375279	TRUE	no hit
ABHD16A	7920	-1.06823	-1.51496	-1.78173	0.0919901	-0.305643	0.498085	0.660341	-2.07536	-0.600268	-0.610705	-0.610273	-0.579825	1.49919	-0.0339046	4.7313	-0.199841	TRUE	no hit
ACACA	31	-2.38414	-3.30851	-1.20904	-2.63487	-4.13263	-1.63434	-2.66966	-8.09389	-1.59874	-1.7629	-1.54924	-1.48409	-0.0382412	0.0764153	0.143474	-0.334613	FALSE	no hit
ACKR2	1238	-0.705246	-2.03437	-1.55351	1.47214	0.48142	1.06881	0.915043	-0.539593	-0.635503	-1.05386	-0.232693	-0.619954	1.6645	-0.148064	5.73846	-0.596903	TRUE	no hit
ACP6	51205	-1.93552	-3.28774	-1.71981	-0.799009	-1.51847	0.0518839	-0.415071	-4.19222	-0.974367	-1.56841	-0.449343	-0.905347	1.62116	0.0581524	5.14794	-0.34262	TRUE	no hit
ACTA2	59	-1.93898	-2.14892	-0.672961	-2.99508	0.200618	1.01692	0.726375	-1.14145	-0.849953	-1.04263	-0.587554	-0.919669	0.664382	-0.0866566	1.66401	0.415794	TRUE	no hit
ACTR3B	57180	-2.93963	-3.93509	-2.00995	-2.87384	-1.24789	0.295738	-0.179235	-3.86016	-1.34521	-1.99111	-1.00722	-1.0373	1.50614	0.075852	4.27795	0.164629	TRUE	no hit
ADAM10	102	-2.5035	-2.64111	-1.98635	-2.88305	-0.276714	0.664114	0.830142	-2.3244	-1.99323	-2.60966	-1.83908	-1.53095	-0.304716	-1.28376	0.825932	-0.456321	FALSE	no hit
ADAM32	203102	-1.77464	-1.44503	-1.74345	-2.13544	-0.647605	0.513651	1.00938	-3.46584	-1.18049	-1.36435	-0.880402	-1.29673	0.833891	-0.801651	3.68393	-0.380608	TRUE	no hit
ADAMTS18	170692	-0.461059	-1.52466	-1.24198	1.38346	0.588175	1.67585	1.60368	-1.51501	-0.0796039	-0.487797	0.361198	-0.112213	2.14632	0.0328798	6.434	-0.0279165	TRUE	no hit
ADAMTSL4	54507	-2.19327	-2.13388	-1.30229	-3.14363	-1.48812	0.274985	-0.132068	-4.60729	-1.44022	-1.64451	-1.43135	-1.24479	0.0633445	-0.518727	0.737201	-0.0284404	TRUE	no hit
ADCY8	114	-2.63836	-2.05113	-2.43967	-3.42428	-1.83921	0.799012	-0.235836	-6.08079	-0.733802	-1.18808	-0.252764	-0.760563	2.85535	-0.283595	8.24344	0.606209	TRUE	no hit
ADGRE3	84658	-0.859703	-0.798575	-0.959639	-0.820895	1.03595	1.40605	1.55652	0.145275	-0.675385	-1.21156	-0.326476	-0.488118	0.898772	-0.885995	3.46247	0.119839	TRUE	no hit
ADGRL1	22859	-0.830155	-0.991724	-0.883499	-0.615242	1.45243	1.46313	2.29233	0.601853	-0.505909	-0.786301	-0.401427	-0.329998	0.903234	-0.4879	3.00813	0.189468	TRUE	no hit
ADIPOQ	9370	-1.72406	-2.30926	-0.913148	-1.94976	-1.25779	0.705621	0.169802	-4.6488	-1.14452	-1.70223	-0.881762	-0.849553	0.353671	-0.528812	1.49241	0.0974129	TRUE	no hit
ADRA1B	147	-3.08703	-2.16928	-1.83334	-5.25848	-0.469314	0.793824	0.849009	-3.05077	-1.15184	-1.70709	-0.472816	-1.27561	1.67799	-0.660116	5.12357	0.570509	TRUE	no hit
AFM	173	-1.97836	-2.03527	-1.64851	-2.25131	-0.234735	1.16739	1.38672	-3.25831	-1.19477	-1.71572	-0.705174	-1.16342	1.0694	-0.742712	4.13291	-0.182005	TRUE	no hit
AGR2	10551	-3.98044	-3.50983	-3.16125	-5.27024	-1.63293	0.591477	0.528272	-6.01853	-0.90099	-1.76355	0.411049	-1.35047	4.48876	-0.0176936	12.9284	0.555578	TRUE	<-3 in 3 replicates
AARS2	57505	-1.45107	-1.3289	-1.45988	-1.56443	-0.634713	-0.306115	-0.518839	-1.07919	-1.04785	-0.868707	-1.45939	-0.815464	0.363868	-0.164724	1.20728	0.049044	TRUE	no hit
ABCA7	10347	0.423159	-0.169608	0.158164	1.28092	2.01184	0.124521	7.61278	-1.70179	-0.576212	-0.572197	-0.646884	-0.509556	-0.498975	-0.61423	-0.469655	-0.41304	FALSE	no hit
ABCC11	85320	-2.01843	-1.63324	-2.78718	-1.63487	-1.65179	-0.342434	-1.49992	-3.11303	-1.28855	-1.23673	-2.09349	-0.53544	1.05704	-0.484768	2.60833	1.04755	TRUE	no hit
ABCF1	23	0.324644	-0.230358	0.287848	0.916441	1.18515	1.00655	0.349037	2.19988	-0.521134	-0.931091	-0.244543	-0.387766	-0.259605	-0.939548	0.376843	-0.216109	FALSE	no hit
ABHD17A	81926	-0.371767	-1.32456	-0.530367	0.739627	1.97379	0.861273	0.867876	4.19222	-0.315891	-0.56619	-0.255978	-0.125506	0.825499	-0.0833387	2.49089	0.0689452	TRUE	no hit
ACACB	32	-3.11503	-3.99079	-2.08074	-3.27356	-5.18839	-1.63953	-4.25448	-9.67116	-1.90705	-2.23566	-2.02568	-1.45982	0.182772	-0.0688278	0.724042	-0.106897	TRUE	toxic
ACKR3	57007	-1.11562	-1.29814	-1.04244	-1.00629	0.0831715	0.555158	0.566006	-0.87165	-1.25904	-1.46726	-1.25506	-1.0548	-0.242012	-0.863977	0.550629	-0.412686	FALSE	no hit
ACP7	390928	-1.27394	-2.4038	-1.2681	-0.149923	-0.594621	-0.280173	-0.216969	-1.28672	-1.10298	-1.59567	-0.861199	-0.85208	0.52998	-0.334041	2.36573	-0.441745	TRUE	no hit
ACTB	60	-3.59865	-3.79017	-2.18041	-4.82537	-1.83779	-0.306115	-1.36785	-3.83941	-1.814	-1.99211	-1.73595	-1.71393	0.812628	0.0442274	2.43487	-0.0412174	TRUE	<-3 in 2 replicates | <-2 in all replicates
ACTR3C	653857	-0.0938849	0.162522	-0.303661	-0.140516	-1.10764	0.0674491	-0.339604	-3.05077	-0.881992	-1.35497	-0.430082	-0.860924	-0.160331	-1.49543	1.4121	-0.397662	FALSE	no hit
ADAM11	4185	-1.78725	-2.1769	-1.31927	-1.86558	-2.53728	-0.155652	-2.01876	-5.43743	-1.87864	-2.35161	-1.91837	-1.36595	-0.916398	-1.12844	-1.14606	-0.474698	FALSE	no hit
ADAM33	80332	-2.25324	-1.08642	-2.76364	-2.90967	-1.3092	0.243854	-0.622607	-3.54886	-1.57472	-1.65069	-2.09409	-0.979379	0.429983	-1.21601	2.20184	0.304123	TRUE	no hit
ADAMTS19	171019	-2.10478	-2.1988	-1.23691	-2.87864	-1.79848	-0.00518839	-0.0566006	-5.33367	-0.868886	-1.51939	-0.318208	-0.76906	1.34453	-0.537096	4.14975	0.420946	TRUE	no hit
ADAMTSL5	339366	-2.24567	-1.96824	-2.16019	-2.60858	-1.96294	0.150463	-0.830142	-5.20914	-1.83229	-2.51553	-1.72837	-1.25298	0.0175008	-1.43246	1.69139	-0.206427	TRUE	no hit
ADCY9	115	-3.05624	-2.58075	-2.75048	-3.83749	-1.85163	0.0674491	-0.537706	-5.08462	-1.25832	-2.17023	-0.613005	-0.991726	2.48072	-0.886799	7.87018	0.45878	TRUE	no hit
ADGRE5	976	-2.43195	-1.74463	-1.63689	-3.91434	-0.964097	0.477332	0.490539	-3.86016	-1.2404	-1.78715	-0.805241	-1.12882	1.08533	-0.948833	3.85061	0.35421	TRUE	no hit
ADGRL2	23266	-1.12729	-0.79247	-1.38831	-1.20108	-1.24286	1.06362	-0.0188669	-4.77332	-1.1136	-1.4557	-1.30754	-0.57757	0.120031	-1.15595	1.21892	0.297126	TRUE	no hit
ADIPOR1	51094	-2.79317	-2.94909	-1.05022	-4.38019	-2.16387	-0.025942	-0.613173	-5.8525	-1.77133	-2.46889	-1.80838	-1.03673	-0.607313	-1.02309	-1.47138	0.672528	FALSE	no hit
ADRA1D	146	-2.32606	-1.49072	-1.28438	-4.20309	-0.755461	0.274985	0.405638	-2.94701	-1.1917	-1.47017	-1.12102	-0.983903	0.597547	-0.757189	1.92958	0.620255	TRUE	no hit
AFP	174	-4.17966	-3.96161	-1.84037	-6.73699	-3.04794	-0.840519	-1.74519	-6.55813	-1.84738	-2.45863	-1.1197	-1.96383	1.11089	-0.36092	3.41309	0.280498	TRUE	no hit
AGR3	155465	-3.17779	-2.79407	-1.50905	-5.23024	-1.76217	-0.0830142	-0.679207	-4.52428	-1.50663	-2.23458	-0.795125	-1.4902	0.947048	-0.859635	3.35668	0.344098	TRUE	no hit
AASDHPPT	60496	-1.29	-2.03737	-1.16144	-0.671181	-2.2112	-0.830142	-1.21691	-4.58654	-1.05172	-1.05984	-1.22826	-0.867053	0.415431	-0.0157148	1.54028	-0.278278	TRUE	no hit
ABCA8	10351	-1.48289	-2.20567	-1.23577	-1.00722	-0.3885	0.347622	1.22635	-2.73947	-0.950526	-1.15983	-0.914038	-0.777707	0.688423	0.00884973	2.14863	-0.0922085	TRUE	no hit
ABCC12	94160	-1.35904	-2.04693	-1.74485	-0.285346	-0.676849	0.19197	-0.0849009	-2.13762	-0.917044	-0.816782	-1.35553	-0.578824	0.812083	0.207466	2.21494	0.0138415	TRUE	no hit
ABCF2	10061	-2.63475	-3.32526	-2.2401	-2.33888	-3.04936	-0.295738	-2.7923	-6.06004	-1.35443	-1.57965	-1.44297	-1.04067	1.13299	0.110022	3.25872	0.0302174	TRUE	no hit
ABHD17B	51104	-1.85703	-2.06642	-2.01799	-1.48668	-0.695244	0.529216	0.311303	-2.92625	-1.08022	-1.3208	-1.15696	-0.76289	1.05954	-0.332582	3.48012	0.0310707	TRUE	no hit
ACAD8	27034	-2.53936	-3.901	-1.6279	-2.0892	-1.83905	-0.0778259	-0.811276	-4.62804	-1.71064	-2.07091	-1.73425	-1.32676	0.0275866	-0.0661184	0.561078	-0.4122	TRUE	no hit
ACLY	47	-1.63669	-1.72852	-1.44034	-1.74121	-1.36062	0.197159	-0.0660341	-4.21297	-1.57992	-1.98726	-1.42779	-1.3247	-0.262339	-1.12113	0.816181	-0.482064	FALSE	no hit
ACPP	55	-1.31272	-1.35602	-1.565	-1.01713	-1.26738	0.399506	-0.528272	-3.67338	-0.915194	-0.818451	-1.01378	-0.913356	0.70149	-0.263687	2.60714	-0.238982	TRUE	no hit
ACTBL2	345651	-3.2606	-3.3454	-1.96633	-4.47006	-2.27157	-0.0830142	-0.858443	-5.87326	-1.59886	-2.18649	-1.19757	-1.41251	0.999223	-0.480697	3.19886	0.279511	TRUE	no hit
ACVR1	90	-1.90892	-1.3938	-1.58997	-2.74299	-0.453591	0.793824	0.584873	-2.73947	-1.43983	-1.61368	-1.38477	-1.32105	0.109935	-0.941135	1.45456	-0.183619	TRUE	no hit
ADAM12	8038	-3.22303	-2.57465	-1.84725	-5.24719	-1.59975	0.243854	-0.622607	-4.42051	-1.83743	-2.10712	-2.18656	-1.21861	-0.227768	-0.744919	-0.641283	0.7029	FALSE	no hit
ADAM7	8756	-2.03965	-0.914815	-1.54687	-3.65727	-1.56658	0.269796	-0.528272	-4.44126	-1.34379	-1.55449	-1.07772	-1.39917	0.356754	-1.1633	2.26993	-0.0363703	TRUE	no hit
ADAMTS2	9509	-2.91375	-1.71263	-2.07947	-4.94914	-1.05136	0.658926	0.254703	-4.0677	-1.03136	-1.44651	-0.326498	-1.32109	2.29281	-0.664763	7.10808	0.43512	TRUE	no hit
ADAR	103	-3.97376	-4.35087	-2.31825	-5.25215	-4.01188	-0.866461	-2.86776	-8.30142	-2.21503	-2.75925	-2.34772	-1.53811	0.121425	-0.373388	0.293418	0.444246	TRUE	<-3 in 2 replicates | <-2 in all replicates
ADCYAP1	116	-4.95665	-4.78253	-3.52979	-6.55762	-3.45169	-0.90278	-1.98102	-7.47128	-1.17964	-2.09449	-0.53292	-0.911504	4.27227	0.418613	10.8501	1.54813	TRUE	<-3 in 3 replicates
ADGRF1	266977	-3.63344	-3.23491	-2.6379	-5.0275	-2.49876	-0.181594	-0.63204	-6.68265	-1.85418	-2.3508	-1.87512	-1.33662	0.783931	-0.658447	2.5303	0.479936	TRUE	<-3 in 2 replicates | <-2 in all replicates
ADGRL3	23284	-3.20519	-2.75595	-2.15664	-4.70297	-1.10418	0.928722	0.179235	-4.42051	-1.88103	-2.30771	-1.84511	-1.49028	0.205717	-0.9611	1.42656	0.151688	TRUE	no hit
ADIPOR2	79602	-2.97734	-2.27363	-1.48262	-5.17576	-1.51611	0.492897	-0.433938	-4.60729	-2.05587	-2.37104	-2.00282	-1.79375	-0.705707	-1.27606	-0.805745	-0.0353155	FALSE	no hit
ADRA2A	150	-3.02047	-3.44068	-1.03693	-4.5838	-0.5822	0.472144	0.188669	-2.40741	-1.07396	-2.0347	-0.419478	-0.767703	1.32204	-0.316312	3.30782	0.97463	TRUE	no hit
AGA	175	-3.07771	-1.68483	-1.70868	-5.83964	-1.06959	0.658926	0.490539	-4.35825	-1.69028	-1.82831	-1.5833	-1.65922	0.0612041	-1.08433	0.947663	0.320278	TRUE	no hit
AGRN	375790	-3.5532	-2.2082	-1.65446	-6.79694	-1.5573	0.295738	-0.0283003	-4.93935	-0.940372	-1.13139	-0.0887394	-1.60099	2.40756	-0.129739	6.59557	0.756834	TRUE	no hit
AASS	10157	0.405919	0.0941968	0.346365	0.777195	-2.25082	-0.954664	-1.27351	-4.52428	-0.249514	-0.325213	-0.110603	-0.312727	0.283912	-0.268542	1.19332	-0.0730374	TRUE	no hit
ABCA9	10350	0.604417	-0.351438	0.896356	1.26833	-0.617261	0.155652	-0.367904	-1.63953	-0.371913	-0.329775	-0.455216	-0.330748	-0.563042	-0.254868	-1.17505	-0.259209	FALSE	no hit
ABCC2	1244	-0.619858	-1.70133	-0.679971	0.521725	-2.22315	-0.892403	-1.89612	-3.88092	-0.962576	-1.09432	-1.13768	-0.655731	-0.186348	-0.157828	-0.0522492	-0.348968	FALSE	no hit
ABCF3	55324	-0.116975	-0.390654	-0.319233	0.358963	-0.576697	0.124521	-0.650907	-1.20371	-0.600813	-0.681924	-0.607082	-0.513433	0.0282772	-0.549627	0.835631	-0.201172	TRUE	no hit
ABHD18	80167	-1.3789	-1.7798	-1.40287	-0.954027	-1.59724	-0.503274	-1.00938	-3.27906	-0.995161	-1.27258	-0.949671	-0.763232	0.69369	-0.494001	2.64057	-0.0655016	TRUE	no hit
ACADM	34	-0.289824	-0.384285	-0.503784	0.0185973	-1.51957	-0.534404	-0.745242	-3.27906	-1.37451	-1.51284	-1.65406	-0.956645	-1.27003	-1.22787	-1.97406	-0.608163	FALSE	no hit
ACMSD	130013	-1.80781	-2.47237	-1.50141	-1.44965	-2.08385	0.155652	-1.40558	-5.00161	-1.73903	-2.17926	-1.86004	-1.17779	-0.475447	-0.844602	-0.188467	-0.393273	FALSE	no hit
ACR	49	-0.475144	0.0222599	-0.14209	-1.3056	-1.98118	-0.119333	-0.0754675	-5.74874	-0.856846	-0.63656	-0.853843	-1.08013	-0.53268	-0.699364	-0.502494	-0.396182	FALSE	no hit
ACTC1	70	-1.43821	-0.680916	-0.794372	-2.83933	-0.486923	0.316492	0.754675	-2.53193	-1.1849	-1.55004	-1.07577	-0.928901	-0.0926788	-1.26223	0.704655	0.279538	FALSE	no hit
ACVR1B	91	-1.06157	-1.1317	-0.0470304	-2.00597	-1.09271	0.0726375	-0.424505	-2.92625	-1.69649	-2.24878	-1.49058	-1.35011	-1.77007	-1.67088	-3.13545	-0.503887	FALSE	no hit
ADAM15	8751	-2.44146	-1.9898	-1.298	-4.03658	-2.94716	-0.907968	-1.70745	-6.22607	-1.70863	-1.96278	-2.22541	-0.937714	-0.711166	-0.870731	-1.94932	0.686555	FALSE	no hit
ADAM8	101	-1.34947	-1.05979	-0.954819	-2.0338	-1.79864	0.166028	-0.622607	-4.93935	-1.23002	-1.36577	-1.30615	-1.01813	-0.315752	-0.834166	-0.0294492	-0.0836417	FALSE	no hit
ADAMTS20	80070	-2.44344	-2.89297	-1.54151	-2.89585	-3.31129	-0.368376	-1.26408	-8.30142	-1.12022	-1.79486	-0.483258	-1.08254	1.43093	-0.356796	4.59375	0.0558496	TRUE	no hit
ADCK1	57143	-1.38739	-1.71592	-0.637779	-1.80847	-1.80729	-0.0882026	0	-5.33367	-1.46781	-2.22441	-1.26641	-0.912607	-0.652467	-1.38603	-0.559876	-0.011495	FALSE	no hit
ADCYAP1R1	117	-2.23325	-1.28803	-1.07329	-4.33845	-2.66888	-0.378753	-0.820709	-6.80717	-0.754754	-1.28295	-0.076095	-0.905216	1.56267	-0.755565	4.67587	0.767697	TRUE	no hit
ADGRF2	222611	-2.82135	-1.78566	-0.492803	-6.1856	-1.61736	0.264608	-0.405638	-4.71106	-1.3004	-1.31266	-0.982079	-1.60646	-0.0133215	-0.496208	-0.0691219	0.525365	FALSE	no hit
ADGRL4	64123	-1.91295	-1.48069	0.665993	-4.92414	-2.77563	-0.0726375	-1.50935	-6.74491	-1.4169	-1.81155	-0.955376	-1.48377	-1.16055	-1.14073	-2.60451	0.263588	FALSE	no hit
ADIRF	10974	-3.44162	-3.4008	-1.1602	-5.76387	-2.94669	-0.425448	-1.35841	-7.05621	-2.08478	-2.57932	-1.90491	-1.77012	-0.69838	-0.810509	-1.50059	0.215963	FALSE	no hit
ADRA2B	151	-1.28432	-1.08093	0.0982169	-2.87024	-0.844922	0.653737	0.0283003	-3.2168	-1.29332	-1.37193	-1.33971	-1.16833	-1.29337	-0.981503	-2.90071	0.00210812	FALSE	no hit
AGAP2	116986	-3.28736	-1.24275	-1.54256	-7.07678	-1.76154	0.332057	-0.386771	-5.2299	-1.64737	-1.27561	-1.68824	-1.97828	0.006064	-0.74568	0.325034	0.438839	TRUE	no hit
AGRP	181	-4.43795	-2.97486	-2.07275	-8.26625	-4.54534	-1.46313	-1.85839	-10.3145	-1.74164	-1.96568	-1.58492	-1.67432	1.20525	-0.311325	2.69087	1.2362	TRUE	no hit
AGT	183	-3.53854	-0.706549	-1.58752	-8.32154	-1.26478	-1.7661	-0.417311	-1.61092	0.82833	0.791427	1.51059	0.182972	1.43974	1.38637	1.36173	1.57113	FALSE	no hit
AIF1L	83543	-2.15609	0.69819	-1.58554	-5.58092	-0.742684	-0.452619	-0.203803	-1.57163	1.16528	1.6661	1.45075	0.378975	1.39221	1.47419	1.35802	1.34441	FALSE	no hit
AKR1B1	231	-0.315686	0.421562	-0.194116	-1.1745	0.321996	0.754365	0.368786	-0.157163	0.805958	1.12628	1.21171	0.0798832	0.734155	0.996903	0.911227	0.294334	FALSE	no hit
AKT3	10000	-3.67514	-2.25106	-4.92512	-3.84924	-1.56213	-1.6951	-0.921966	-2.06931	0.284118	0.20087	0.658747	-0.0072616	1.19591	1.9529	1.03847	0.596347	FALSE	<-3 in 2 replicates | <-2 in all replicates
ALDH2	217	-0.783251	-0.299092	-0.324546	-1.72612	-0.443997	-0.683366	-0.242623	-0.406004	0.736163	0.53178	1.49088	0.185828	0.796218	0.765766	1.14567	0.477216	FALSE	no hit
ALK	238	-9.98309	-4.32733	-9.83727	-15.7847	-3.52152	-3.84282	-2.98911	-3.73262	-0.67154	-1.02941	0.0617266	-1.04693	1.52397	2.17484	1.21033	1.18675	TRUE	toxic
ALPK3	57538	-4.24923	-1.59053	-6.28384	-4.87332	-0.051844	0.665616	0.213508	-1.03466	1.45972	2.27978	1.7644	0.334992	2.54983	4.17381	2.34687	1.12881	FALSE	no hit
AMOT	154796	-3.8282	-1.37938	-5.3559	-4.74932	-0.350479	1.25136	-0.45613	-1.84666	0.333694	0.564574	0.219757	0.216752	1.11643	1.68254	0.645896	1.02086	FALSE	no hit
ANGPT4	51378	-2.20213	-0.675162	0.11036	-6.0416	0.43842	1.44661	0.300852	-0.432198	1.64008	1.57058	1.96255	1.38711	2.16848	2.32797	1.56312	2.61435	FALSE	no hit
ANO2	57101	-2.18857	-0.908088	-1.66215	-3.99547	-1.10615	-0.949612	-0.679343	-1.6895	-0.00285299	-0.552495	0.753047	-0.209111	0.330372	-0.104507	0.702598	0.393025	TRUE	no hit
ANXA5	308	-2.14025	-1.16268	-6.20701	0.94894	-1.02227	-1.74835	-0.0873441	-1.23111	0.333027	-0.367456	0.790427	0.57611	0.748078	0.289397	1.38929	0.565548	FALSE	no hit
AP2M1	1173	-5.19122	-1.8437	-10.8013	-2.92868	-0.0614129	0.541368	0.164983	-0.89059	1.25839	0.917444	2.89625	-0.0385154	2.40302	2.56619	4.21459	0.428273	FALSE	no hit
APLP2	334	-5.65462	-1.75092	-8.3181	-6.89485	-0.489295	-0.0443744	-0.873441	-0.55007	0.715437	0.490139	1.4945	0.161668	1.88542	1.95503	2.42035	1.28087	FALSE	no hit
APOC4	346	-7.19926	-2.22989	-17.0125	-2.35539	1.75376	-0.505868	-0.912261	6.67942	0.504406	0.229378	1.78594	-0.502101	2.02014	1.99977	4.27764	-0.216981	FALSE	no hit
AQP10	89872	-11.2263	-2.87247	-20.2266	-10.5797	-2.1301	-2.1566	-1.33928	-2.89442	0.0392942	-1.10011	2.03944	-0.82145	2.17127	0.715447	5.18959	0.608782	FALSE	<-3 in 2 replicates | <-2 in all replicates
ARF1	375	-5.04615	-2.24239	-9.41187	-3.4842	-0.974199	-1.07386	-0.368786	-1.47995	0.0585727	-0.323269	0.665066	-0.166078	1.17887	1.34774	1.78471	0.404161	FALSE	<-3 in 2 replicates | <-2 in all replicates
ARL1	400	-8.01189	-0.442461	-14.4401	-9.15309	1.79665	0.683366	5.26976	-0.563167	0.885043	1.09584	1.6788	-0.119518	2.1916	1.59727	3.66207	1.31546	FALSE	no hit
ARPC1B	10095	-4.69909	0.574603	-8.61583	-6.05605	0.988332	1.67735	0.737573	0.55007	1.03475	1.26833	1.14632	0.689615	1.60931	0.912757	2.10027	1.81491	FALSE	no hit
ARSH	347527	-4.30846	0.150726	-9.80025	-3.27587	-0.0920736	-0.39937	-0.164983	0.288132	-0.353634	-0.985046	0.645106	-0.720963	-0.0166972	-1.54704	1.84302	-0.346072	FALSE	no hit
ASH2L	9070	-5.98377	-1.59293	-11.0882	-5.27019	-0.35636	-0.807614	-0.0388196	-0.222647	-0.0255455	-0.491719	0.855207	-0.440124	1.01661	0.510524	2.22029	0.319002	TRUE	no hit
ASRGL1	80150	-9.35768	-1.62113	-15.7939	-10.658	-1.19619	-0.665616	-1.15488	-1.76808	-0.218034	-0.0020513	-0.0819971	-0.570055	1.44587	1.25371	2.0969	0.987004	TRUE	no hit
AGTPBP1	23287	-0.465971	0.388968	-2.42421	0.637324	0.529583	0.683366	0.669638	0.235744	1.56228	2.59925	1.69263	0.394967	1.62513	2.8358	1.67474	0.364858	FALSE	no hit
AIFM1	9131	0.522836	0.70136	0.62333	0.24382	-0.188583	-0.949612	0.47554	-0.0916784	0.752104	0.241491	1.27944	0.73538	0.410125	-0.479308	0.84781	0.861873	FALSE	no hit
AKR1B10	57016	-4.39144	-2.04049	-4.61366	-6.52018	-1.95573	-2.17435	-1.3878	-2.30506	0.743093	1.08689	1.15314	-0.0107484	1.82989	2.98743	1.51442	0.987831	FALSE	<-3 in 2 replicates | <-2 in all replicates
ALAD	210	-1.36976	0.39526	-0.0163452	-4.4882	1.27069	2.0146	0.815212	0.982268	1.04733	2.05697	0.543156	0.541867	1.19996	2.06318	0.193434	1.34327	FALSE	no hit
ALDH3A1	218	-2.76867	-1.17033	-5.28195	-1.85372	1.89523	3.22158	1.1937	1.2704	1.58418	2.28572	1.71787	0.748952	2.3728	3.82428	2.128	1.16613	FALSE	no hit
ALKAL2	285016	-6.54581	-1.16845	-9.40245	-9.06654	-0.846598	-0.665616	-0.97049	-0.903687	0.811599	1.15631	1.40626	-0.127774	1.96913	2.22088	2.47448	1.21201	FALSE	no hit
ALPL	249	-4.35032	-1.13943	-5.84288	-6.06864	0.528672	1.05611	0.582294	-0.0523876	1.54329	2.14817	1.68047	0.80123	2.52895	3.54085	2.13564	1.91037	FALSE	no hit
AMPD1	270	-1.29126	0.087566	-1.01692	-2.94443	1.39629	2.93758	0.766687	0.484586	1.42077	1.93962	1.52177	0.800928	1.62573	2.20407	1.2703	1.40281	FALSE	no hit
ANGPTL1	9068	-4.87418	-1.29175	-6.91372	-6.41706	0.24578	1.60635	-0.698753	-0.17026	1.60932	2.19698	1.95567	0.675316	2.75828	3.81579	2.63507	1.82396	FALSE	no hit
ANO6	196527	-2.35653	-0.135225	0.147274	-7.08164	0.10723	0.612367	-0.329967	0.0392907	0.639283	1.45185	0.160121	0.305877	1.02503	1.75348	-0.168928	1.49055	FALSE	no hit
ANXA6	309	-1.26726	0.260382	-0.197623	-3.86453	1.63589	2.60034	0.892851	1.41447	0.561963	0.636115	0.882097	0.167678	0.565707	0.366875	0.540731	0.789516	FALSE	no hit
AP4M1	9179	-6.20813	-1.69923	-9.59061	-7.33456	-0.878406	-0.328371	-0.931671	-1.37518	0.966819	1.51717	0.964764	0.41852	2.33726	3.2372	2.12245	1.65212	FALSE	no hit
APMAP	57136	-4.01899	-1.86143	-5.17753	-5.01802	-0.266272	0.186372	-0.0291147	-0.956074	0.626237	0.845813	0.813967	0.218931	1.66494	2.45352	1.23091	1.31038	FALSE	no hit
APOD	347	-1.77257	-1.98483	0.139453	-3.47235	3.42242	1.09161	0.164983	9.01067	0.967174	1.17393	0.886282	0.841309	1.66955	2.99522	0.505798	1.50765	FALSE	no hit
AQP11	282679	-6.47226	-2.70859	-7.70636	-9.00183	0.242846	0.843113	-0.271737	0.157163	0.501618	0.626143	0.485632	0.39308	2.05364	2.96457	1.33924	1.85712	FALSE	<-3 in 2 replicates | <-2 in all replicates
ARF3	377	-2.69874	-1.45808	-0.909449	-5.7287	0.404694	1.64185	0.174688	-0.602458	0.709351	1.8603	0.533742	-0.265992	1.42976	3.40548	0.331178	0.552613	FALSE	no hit
ARL15	54622	-2.26351	-1.22335	-4.08537	-1.48181	2.82318	0.789864	6.88078	0.798911	0.715951	1.42528	0.380052	0.342517	1.3311	2.68448	0.658627	0.650184	FALSE	no hit
ARPC2	10109	-5.0683	-2.28451	-7.16131	-5.75908	0.203946	1.00286	-0.155278	-0.235744	-0.326632	0.155582	-0.537641	-0.597838	0.774738	1.94425	0.238091	0.141869	TRUE	<-3 in 2 replicates | <-2 in all replicates
ARSI	340075	0.6563	-0.584624	2.35182	0.201704	0.87613	1.14486	0.51436	0.969171	0.404351	0.947673	0.171316	0.0940641	0.387638	1.49374	-0.464831	0.134003	FALSE	no hit
ASIC1	41	-2.11922	-0.435485	-3.34094	-2.58124	0.863797	1.02061	0.339672	1.23111	0.622833	1.32988	0.789653	-0.251033	0.947562	1.81429	0.928739	0.0996592	FALSE	no hit
ASS1	445	-2.65021	-1.53471	-1.67187	-4.74406	0.178491	1.07386	0.116459	-0.654845	0.196263	0.618547	0.313833	-0.343592	0.834925	1.90937	0.253698	0.341708	FALSE	no hit
AGTR1	185	-0.333621	-0.810466	-0.635943	0.445544	0.164548	-0.505868	0.737573	0.261938	0.994896	1.76996	0.900221	0.314508	1.26782	2.85851	0.607266	0.337677	FALSE	no hit
AIFM2	84883	-3.42177	-1.83312	-3.6655	-4.76668	-0.315123	-0.204122	-0.164983	-0.576264	0.573056	1.77858	0.517083	-0.576501	1.48474	3.75974	0.687642	0.00684328	FALSE	no hit
AKR1B15	441282	-1.51231	-1.97719	1.60295	-4.16267	0.231031	1.6241	-0.446426	-0.484586	0.996458	1.96037	0.821815	0.207187	1.77911	4.15413	0.247088	0.93612	FALSE	no hit
ALAS1	211	-0.896403	-0.494896	-0.277163	-1.91715	0.216419	0.310621	0.155278	0.183357	0.838505	1.49656	0.620654	0.398303	1.08563	2.14313	0.338549	0.775225	FALSE	no hit
ALDH3A2	224	-1.4904	-1.33074	-1.56777	-1.57271	0.691392	1.89035	-0.0388196	0.222647	0.817995	1.94105	0.47078	0.0421565	1.37668	3.4575	0.381853	0.290679	FALSE	no hit
ALKBH2	121642	-2.22858	-1.79293	-0.714716	-4.17808	1.32312	2.20984	0.436721	1.32279	0.767077	1.35376	0.483273	0.464201	1.52159	3.11079	0.269203	1.18476	FALSE	no hit
ALPP	250	-3.20154	-1.65789	-2.04013	-5.9066	0.804741	1.5176	0.582294	0.314326	1.23484	1.95516	0.680771	1.0686	2.21876	3.79468	0.662242	2.19935	FALSE	no hit
AMPD2	271	-1.24282	-1.62103	-0.944417	-1.16301	1.24624	2.0856	0.0291147	1.62402	0.881133	1.3195	0.550071	0.773828	1.44956	2.90738	0.348033	1.09327	FALSE	no hit
ANGPTL2	23452	-4.58602	-2.75898	-6.03546	-4.9636	0.231166	-0.221872	0.116459	0.798911	1.62687	1.75863	2.08231	1.03967	3.05595	4.54296	2.58714	2.03775	FALSE	<-3 in 2 replicates | <-2 in all replicates
ANOS1	3730	-0.916819	-0.436645	0.597549	-2.91136	0.352824	1.19811	0.174688	-0.314326	0.329939	0.463128	0.296314	0.230374	0.475613	0.766119	-0.105518	0.766239	FALSE	no hit
ANXA7	310	-3.02716	-2.14571	-2.65652	-4.27925	0.0330842	0.204122	-0.262032	0.157163	0.204899	0.472297	0.387482	-0.245083	1.05784	2.36286	0.440921	0.369731	FALSE	no hit
APAF1	317	-5.00225	-3.56107	-1.5548	-9.89087	0.789102	1.28686	0.543475	0.536973	1.62544	3.60951	0.868779	0.398023	3.59394	7.97929	0.739995	2.06253	FALSE	no hit
APOA1	335	-5.20621	-2.33131	-5.11288	-8.17444	0.345607	0.789864	0.155278	0.0916784	0.887727	2.12058	0.612293	-0.0696913	2.27046	4.62087	1.06326	1.12727	FALSE	<-3 in 2 replicates | <-2 in all replicates
APOE	348	-2.29488	-2.4784	-1.65473	-2.7515	3.84961	1.02061	0.679343	9.84887	0.418221	0.904224	0.871989	-0.52155	1.228	3.10643	0.769365	-0.191787	FALSE	no hit
AQP2	359	-4.38348	-3.39819	-7.89095	-1.86132	1.02845	0.807614	0.902556	1.37518	1.34225	2.70076	1.30584	0.0201482	3.00774	6.55636	2.16141	0.305455	FALSE	no hit
ARF4	378	-4.70069	-3.62319	-8.32698	-2.1519	-0.26863	-0.328371	-0.582294	0.104775	-0.056947	0.982383	0.00906566	-1.16229	1.41971	4.34007	0.952702	-1.03366	TRUE	<-3 in 2 replicates | <-2 in all replicates
ARL2	402	-6.23382	-2.24836	-8.29861	-8.15451	4.63108	3.38133	9.307	1.20492	1.84146	3.40938	1.57648	0.538527	3.55383	6.26741	2.49429	1.89981	FALSE	<-3 in 2 replicates | <-2 in all replicates
ARPC3	10094	-8.59165	-3.38638	-12.2824	-10.1061	-0.0113552	0.718865	-0.281442	-0.471489	0.916659	3.06395	-0.176811	-0.137159	3.29062	7.02465	1.39904	1.44819	FALSE	<-3 in 3 replicates
ARSJ	79642	-1.63541	-2.11224	-2.75663	-0.0373754	-0.287626	-0.505868	0.0097049	-0.366713	0.226688	0.928371	-0.00317505	-0.245132	0.9094	2.92174	0.0949875	-0.288525	FALSE	no hit
ASIC2	40	-2.48351	-2.21318	-1.76466	-3.47269	0.672954	1.37561	0.145574	0.497683	0.530757	1.79254	0.499864	-0.700139	1.40175	4.07515	0.423102	-0.293	FALSE	no hit
ASTL	431705	-4.00023	-2.6446	-4.21073	-5.14536	0.461003	1.21586	0.795802	-0.628652	-0.124639	0.214883	0.0945291	-0.683329	0.896852	2.31981	0.41874	-0.0479954	TRUE	<-3 in 2 replicates | <-2 in all replicates
AGTR2	186	0.787283	0.398272	0.487404	1.47617	0.824608	0.985112	0.0873441	1.40137	1.6144	2.53536	1.70277	0.605087	1.52666	2.78076	1.30373	0.49548	FALSE	no hit
AIFM3	150209	-3.76701	0.136006	-11.6585	0.221441	-0.663047	-0.843113	-0.805507	-0.34052	0.432853	1.0492	-0.101307	0.350669	0.977907	1.12602	1.36769	0.440014	FALSE	no hit
AKR1C1	1645	-0.193797	0.0484317	-2.73935	2.10953	1.08316	0.718865	1.3781	1.15253	1.16741	1.80991	1.14508	0.547231	1.19005	2.06278	1.19616	0.311226	FALSE	no hit
ALAS2	212	-1.73977	-0.0709956	-1.35039	-3.79792	0.869497	0.576867	0.407606	1.62402	0.542968	1.4335	0.325718	-0.130318	0.777383	1.71567	0.212326	0.404154	FALSE	no hit
ALDH3B1	221	-1.34653	-1.10666	-4.54072	1.60781	0.906892	1.30461	0.407606	1.00846	1.04923	1.89976	0.520351	0.727598	1.57559	3.21857	0.873932	0.634267	FALSE	no hit
ALKBH3	221120	-4.38786	-2.70217	-7.39141	-3.06999	-0.276604	-0.417119	0.281442	-0.694136	0.907909	1.57124	0.902739	0.249744	2.22831	4.25178	1.67983	0.753327	FALSE	<-3 in 2 replicates | <-2 in all replicates
ALPPL2	251	-1.10064	-2.06518	-1.70668	0.469932	0.445884	-0.150873	0.912261	0.576264	0.989737	1.33368	1.17963	0.455902	1.63382	3.38958	1.05786	0.454006	FALSE	no hit
AMPD3	272	-2.56884	-0.803649	-2.74367	-4.15922	0.760113	1.28686	0.155278	0.838202	0.244021	0.854939	0.0310647	-0.153941	0.712332	1.62129	0.090514	0.425187	FALSE	no hit
ANGPTL3	27329	-0.989995	-0.00172538	-1.02424	-1.94402	1.79789	2.36959	1.72747	1.29659	1.41865	1.84592	1.56597	0.844054	1.61818	2.19869	1.36216	1.2937	FALSE	no hit
ANP32B	10541	-2.92229	-3.21488	-0.44944	-5.10256	-0.975864	-0.470369	-0.95108	-1.50614	-0.247543	0.636237	-0.574175	-0.804692	0.822458	3.47191	-0.799184	-0.20535	TRUE	no hit
ANXA8	653145	1.52686	-0.307919	1.0509	3.83759	1.46704	2.42284	0.485245	1.49305	0.378186	1.15715	-0.275218	0.252629	0.197951	1.52687	-0.693803	-0.239215	FALSE	no hit
APBB1	322	-3.41806	-1.81393	-1.54863	-6.89163	1.38653	1.6951	0.892851	1.57163	0.41527	0.454036	0.942536	-0.15076	1.20446	1.92253	0.827239	0.863616	FALSE	no hit
APOA2	336	-3.24977	-1.85148	-9.84008	1.94224	-0.49422	0.150873	-0.834622	-0.798911	0.288175	0.719959	0.47164	-0.327073	1.11195	2.34072	1.62416	-0.629044	FALSE	no hit
APOF	319	-4.63588	-2.89125	-8.38062	-2.63576	1.99625	-0.754365	-0.931671	7.67479	0.3707	0.966813	0.182162	-0.0368761	1.733	3.6628	1.10948	0.42673	FALSE	no hit
AQP3	360	-0.00392631	-0.185467	-3.01539	3.18908	0.932228	2.17435	-0.0194098	0.641748	0.397543	1.1174	0.841513	-0.766288	0.319505	1.29412	0.988058	-1.32366	FALSE	no hit
ARF5	381	-5.39963	-2.97163	-7.31785	-5.90941	-1.4119	-1.41111	-1.43633	-1.38827	-0.559306	-0.794421	-0.103691	-0.779806	0.686825	1.34218	0.679567	0.0387283	TRUE	<-3 in 2 replicates | <-2 in all replicates
ARL3	403	-3.16266	-1.23967	-5.38591	-2.86239	2.03134	-0.647866	6.45376	0.288132	0.709489	1.37528	1.13763	-0.38444	1.39329	2.67112	1.54189	-0.0331323	FALSE	no hit
ARPC4	10093	-9.38443	-2.86998	-15.1312	-10.1521	-1.64511	-2.1211	-0.941376	-1.87286	0.308898	0.40899	0.60414	-0.0864374	2.35042	2.87408	2.67207	1.50513	FALSE	<-3 in 2 replicates | <-2 in all replicates
ARSK	153642	-1.41502	-0.364781	-5.33867	1.4584	-0.871541	-0.860863	-0.640524	-1.11324	-0.340768	-0.579318	-0.0485072	-0.39448	-0.288146	-0.739224	0.445898	-0.571113	FALSE	no hit
ASIC3	9311	-4.68486	-2.06214	-7.22927	-4.76317	-0.931369	-1.5531	-0.53377	-0.707233	0.10913	-0.902733	0.723735	0.506389	1.06729	0.358047	1.43027	1.41354	FALSE	<-3 in 2 replicates | <-2 in all replicates
ASTN1	460	-4.35384	-1.01393	-11.1509	-0.896732	-0.974487	-0.150873	-1.13547	-1.63711	-0.188987	0.0825845	-0.207781	-0.441765	0.505371	0.699356	1.17309	-0.356331	TRUE	no hit
AGXT	189	-1.0015	-0.857369	-1.63449	-0.512625	-0.45636	-0.665616	-0.310557	-0.392907	0.673123	1.06809	1.26029	-0.30901	0.927802	1.90333	1.13334	-0.253267	FALSE	no hit
AIM2	9447	-2.24865	-0.939444	-3.42181	-2.3847	-1.02915	-0.39937	-0.815212	-1.87286	0.231807	0.538905	0.233344	-0.0768274	0.668802	1.32199	0.405787	0.278627	FALSE	no hit
AKR1C2	1646	-1.08249	-0.651324	-0.903604	-1.69253	1.89119	3.09733	1.39751	1.17872	0.667209	1.26114	0.621814	0.118678	0.913017	1.93118	0.43552	0.372348	FALSE	no hit
ALB	213	-1.99437	-0.774414	-5.42259	0.213888	1.07211	1.14486	0.630819	1.44066	0.859746	1.44137	0.68944	0.448433	1.32055	2.31373	1.15675	0.491178	FALSE	no hit
ALDH3B2	222	0.489759	0.0436297	-0.832197	2.25784	1.7783	2.52934	1.11606	1.6895	0.744934	0.871947	1.2436	0.119258	0.550244	0.81838	0.987431	-0.15508	FALSE	no hit
ALOX12	239	-0.381951	1.32861	-1.41641	-1.05805	0.985764	2.0146	0.562884	0.37981	1.04068	1.67678	1.25676	0.188491	0.771878	0.825298	1.0821	0.408236	FALSE	no hit
ALYREF	10189	-0.914147	-0.572452	-2.08421	-0.0857791	0.486535	0.701115	0.902556	-0.144066	0.638883	0.483392	1.40863	0.024624	0.731365	0.852107	1.32893	0.0130627	FALSE	no hit
AMT	275	-2.9606	-0.504945	-3.67906	-4.6978	0.3613	0.914112	0.0388196	0.130969	0.197968	0.445572	0.754739	-0.606407	0.575739	0.75449	0.980204	-0.00747713	FALSE	no hit
ANGPTL4	51129	-1.83903	-0.457887	-3.85387	-1.20532	1.53572	2.68909	0.320262	1.59782	0.966433	1.63105	1.05468	0.21357	1.2864	2.20934	1.24422	0.405652	FALSE	no hit
ANPEP	290	-5.76438	-2.66482	-6.52442	-8.10391	-2.71517	-2.97308	-1.68865	-3.48378	-1.20383	-2.10765	-0.143874	-1.35998	-0.232122	-0.792961	0.523294	-0.426699	FALSE	<-3 in 2 replicates | <-2 in all replicates
ANXA8L1	728113	-0.497194	0.0605429	-1.94539	0.39327	1.28005	1.5531	1.21311	1.07395	0.0678561	0.0181087	0.481193	-0.295733	-0.0753514	-0.286387	0.435132	-0.374799	FALSE	no hit
APCS	325	-2.14867	-1.26861	-4.0892	-1.08819	0.851634	1.28686	0.194098	1.07395	0.575715	0.818674	0.763299	0.145171	1.07503	1.84997	1.01822	0.35692	FALSE	no hit
APOA4	337	-2.76573	-0.448579	-3.65183	-4.19678	2.81115	0.36387	1.1937	6.87588	0.561935	0.806354	1.25593	-0.376481	0.934117	1.1824	1.41868	0.201272	FALSE	no hit
APOH	350	-4.15974	-1.17029	-9.84459	-1.46434	3.02436	0.38162	-0.135869	8.82732	-0.00597032	0.221066	0.0432377	-0.282215	0.74098	1.11266	1.19358	-0.0833042	TRUE	no hit
AQP4	361	-2.79749	-1.64602	-7.36994	0.6235	0.567588	1.19811	0.504655	0	0.237183	0.618424	0.85199	-0.758864	0.899393	2.01901	1.65889	-0.979724	FALSE	no hit
ARF6	382	-2.87352	-0.996619	-5.84245	-1.78149	0.15842	0.931862	-0.417311	-0.0392907	-0.346791	-0.745232	0.561052	-0.856193	-0.0340676	-0.429486	1.06149	-0.734202	FALSE	no hit
ARL5A	26225	-5.90342	-3.10804	-8.81466	-5.78755	2.05729	0.00887488	7.21074	-1.04775	0.235725	0.563105	0.907152	-0.763083	1.70767	3.27203	1.92522	-0.0742289	FALSE	<-3 in 3 replicates
ARPC5	10092	-6.50726	-2.05811	-7.97893	-9.48475	-0.962339	-1.09161	-0.446426	-1.34898	0.0360393	0.399733	0.393322	-0.684937	1.29855	2.05262	1.24253	0.600505	FALSE	<-3 in 2 replicates | <-2 in all replicates
ART1	417	-2.62466	-1.18797	-4.41858	-2.26743	0.863649	2.10335	0.291147	0.196454	-0.0782427	0.165647	0.305824	-0.706199	0.379024	0.9752	0.624293	-0.462421	TRUE	no hit
ASIC4	55515	-5.65033	-1.51429	-9.82657	-5.61014	0.0721402	0.275121	-0.0194098	-0.0392907	-0.376249	-0.329221	-0.451404	-0.348122	0.61306	0.662534	0.717395	0.459251	TRUE	no hit
ASXL1	171023	-4.99919	-1.65538	-9.39112	-3.95106	-0.239524	-0.434869	0.174688	-0.458392	-0.484751	-1.01636	-0.206047	-0.231842	0.302872	-0.274435	0.868977	0.314074	TRUE	no hit
AGXT2	64902	0.130766	-0.0331037	-0.9077	1.3331	-0.544631	-0.36387	-0.300852	-0.969171	0.776897	1.46635	0.657082	0.207258	0.742676	1.71719	0.453452	0.057386	FALSE	no hit
AIMP1	9255	0.272143	-1.2963	0.214608	1.89812	-0.510862	-0.541368	-0.611409	-0.37981	0.577482	1.37764	0.124879	0.229928	0.853752	2.74682	-0.213452	0.027888	FALSE	no hit
AKR1C3	8644	-2.89264	-0.87181	-4.08717	-3.71893	0.396188	0.718865	0.417311	0.0523876	1.22438	1.50384	1.21476	0.954547	1.89484	2.5251	1.47537	1.68404	FALSE	no hit
ALCAM	214	-3.33112	-1.19045	-3.29737	-5.50555	0.287471	1.02061	-0.184393	0.0261938	0.599386	0.984386	0.900629	-0.0868562	1.24521	2.04531	0.986285	0.704036	FALSE	no hit
ALDH4A1	8659	-0.628966	0.00490186	-1.06644	-0.825357	1.20079	1.74835	0.203803	1.65021	1.04929	2.00595	0.421887	0.720038	1.22415	2.43855	0.243107	0.990807	FALSE	no hit
ALOX12B	242	-2.03835	-1.49276	0.753812	-5.3761	0.900452	1.53535	1.04813	0.117872	0.926844	2.32522	0.501042	-0.04573	1.67939	4.15203	0.0359134	0.850243	FALSE	no hit
AMBN	258	-3.29656	-0.886595	-8.36674	-0.636328	-0.0936973	0.0798739	-0.203803	-0.157163	0.765433	0.997105	1.25871	0.0404836	1.40295	1.86149	2.19754	0.149829	FALSE	no hit
AMTN	401138	-1.69916	0.656314	-0.789286	-4.96451	1.42371	3.50558	0.320262	0.445295	0.486502	1.55043	0.0670743	-0.158001	0.523906	1.20077	-0.168844	0.539792	FALSE	no hit
ANGPTL5	253935	-3.17499	0.238724	-2.60888	-7.15483	0.899856	1.9081	0.883146	-0.0916784	0.792123	1.53708	0.337485	0.5018	1.21159	1.52095	0.411363	1.70247	FALSE	no hit
ANTXR1	84168	-0.353752	-0.086886	0.115294	-1.08966	0.248422	0.914112	-0.116459	-0.0523876	-0.661075	-0.834045	-0.444909	-0.704269	-0.88225	-1.21542	-0.750985	-0.680339	FALSE	no hit
ANXA9	8416	-2.96612	-0.040588	-5.63343	-3.22434	0.0489814	0.630116	-0.116459	-0.366713	-0.714983	-0.284127	-1.25045	-0.61037	-0.495819	-0.579305	-0.701948	-0.206205	FALSE	no hit
APEH	327	-3.3039	-1.16156	-4.03089	-4.71926	0.809136	1.9791	0.291147	0.157163	0.872699	1.55914	1.22032	-0.161368	1.57482	2.7714	1.43201	0.521057	FALSE	no hit
APOA5	116519	-0.776012	-0.567473	-1.96693	0.206369	4.19033	2.0146	0.786097	9.77029	0.428119	1.83127	0.14396	-0.690875	0.632606	2.60602	0.123241	-0.831445	FALSE	no hit
APOL1	8542	1.04176	-2.09139	-3.06307	8.27975	4.43588	1.60635	1.14518	10.5561	0.523837	1.50608	0.52776	-0.462329	0.836879	3.56407	0.620726	-1.67416	FALSE	no hit
AQP5	362	-0.371624	0.205344	0.415639	-1.73585	1.54082	2.0501	1.44603	1.12633	0.892499	1.87611	0.937573	-0.136181	0.880369	1.97026	0.566776	0.104075	FALSE	no hit
ARG1	383	-3.81936	-1.99512	-7.02714	-2.43581	-0.258491	0.221872	-0.106754	-0.89059	-0.579387	-0.424683	-0.170485	-1.14299	0.146554	0.822659	0.587669	-0.970667	TRUE	no hit
ARL5B	221079	-6.84561	-3.91728	-5.58906	-11.0305	1.25245	-1.09161	5.94911	-1.10014	-0.501629	1.28891	-0.925312	-1.86849	1.56218	5.80237	-0.450522	-0.665321	TRUE	<-3 in 3 replicates
ARPC5L	81873	-4.61392	-0.969325	-7.66665	-5.20579	0.367245	0.275121	0.145574	0.681039	-0.300332	-0.179394	-0.123837	-0.597764	0.38141	0.363938	0.705818	0.0744733	TRUE	no hit
ART3	419	-0.840956	-0.488604	-1.73731	-0.296949	0.276179	1.32236	-0.0485245	-0.445295	-0.813414	-0.397166	-0.701308	-1.34177	-0.835264	-0.336795	-0.691324	-1.47767	FALSE	no hit
ASIC5	51802	-3.05785	-1.4745	-5.64761	-2.05145	0.861442	1.39336	0.339672	0.851299	-0.163208	0.237975	0.0647643	-0.792365	0.468564	1.3979	0.615083	-0.607287	TRUE	no hit
ATAD2	29028	-5.40353	-1.55341	-8.31675	-6.34042	-0.361488	-0.168623	-0.0776392	-0.838202	-0.660646	-0.718197	-0.485873	-0.777866	0.223708	0.164077	0.422796	0.0842498	TRUE	no hit
AHCTF1	25909	-3.04712	-0.351055	-3.70284	-5.08747	-1.03409	-1.44661	-0.359081	-1.29659	0.615302	1.44097	0.173525	0.231413	1.16575	1.99039	0.426343	1.08053	FALSE	no hit
AIP	9049	-0.489756	2.19034	-0.0107766	-3.64883	-0.0114614	0.701115	-0.368786	-0.366713	0.359184	1.16011	0.526784	-0.609339	-0.179598	-0.544259	0.180249	-0.174784	FALSE	no hit
AKR1C4	1109	-2.23793	0.290945	-4.58122	-2.42351	0.665827	1.28686	1.33928	-0.628652	0.372517	0.964098	0.335345	-0.181893	0.524508	0.742953	0.689314	0.141257	FALSE	no hit
ALDH16A1	126133	-2.31342	-0.578989	-2.76863	-3.59264	0.49163	1.26911	0.310557	-0.104775	0.278392	1.07548	0.0349998	-0.275308	0.681275	1.66504	0.161813	0.216975	FALSE	no hit
ALDH5A1	7915	-3.86776	0.931827	-5.69558	-6.83954	-0.524711	-0.0266246	-0.368786	-1.17872	0.0813864	0.987323	-0.529713	-0.21345	0.377607	0.289902	-0.0037019	0.846619	FALSE	no hit
ALOX15	246	-3.16863	-0.882363	-3.25265	-5.37088	0.295479	0.275121	0.349377	0.261938	-0.02089	0.318549	-0.0681459	-0.313073	0.489003	0.878168	0.104629	0.484212	TRUE	no hit
AMBP	259	-5.57726	-0.166291	-7.63553	-8.92995	0.415297	0.878613	0.223213	0.144066	0.319643	0.827631	0.216105	-0.0848075	1.09306	0.960334	1.00025	1.3186	FALSE	no hit
AMY2B	280	-1.80989	-0.0291118	-3.89431	-1.50626	1.09168	1.37561	1.04813	0.851299	0.37185	1.84257	-0.0843495	-0.642669	0.805762	2.75005	0.180908	-0.513676	FALSE	no hit
ANGPTL6	83854	-4.46327	-0.857453	-4.87178	-7.66058	0.118111	0.772114	-0.378491	-0.0392907	0.645941	1.53144	0.122401	0.283987	1.51465	2.47557	0.540149	1.52823	FALSE	no hit
ANTXR2	118429	-5.13355	-1.67036	-4.82481	-8.90549	-1.44049	-1.23361	-1.05783	-2.03002	-1.00187	-1.46374	-0.458462	-1.0834	-0.257111	-0.791362	-0.0391424	0.0591715	FALSE	no hit
AOAH	313	-3.37745	-1.30182	-3.27123	-5.55931	-0.508035	-0.168623	-0.543475	-0.812008	-0.723945	-0.531583	-0.191943	-1.44831	-0.244739	0.172431	-0.0185401	-0.888109	FALSE	no hit
APELA	100506013	-5.03547	-1.16862	-9.69539	-4.2424	0.100107	1.18036	-0.329967	-0.55007	0.373691	0.869876	0.621434	-0.370237	1.30967	1.91252	1.76436	0.252121	FALSE	no hit
APOB	338	-6.06737	-1.72942	-10.7463	-5.72642	2.61516	0.541368	-0.213508	7.51763	-0.236069	0.340368	-0.0495897	-0.998985	0.868452	1.70126	1.24975	-0.34565	TRUE	no hit
APOL4	80832	-5.23023	-1.65909	-7.93725	-6.09437	2.86366	0.505868	-0.0873441	8.17247	-0.127923	0.775073	-0.46767	-0.691174	0.932203	2.30338	0.376039	0.117188	TRUE	no hit
AQP6	363	-3.10258	-1.63746	-5.00333	-2.66695	0.886851	1.7661	-0.0485245	0.942977	0.116162	1.18527	-0.220896	-0.615882	0.881946	2.73039	0.23477	-0.319318	FALSE	no hit
ARG2	384	-0.782915	0.182188	-2.61709	0.0861543	1.13268	2.36959	0.242623	0.785814	-0.0566099	0.618164	0.692051	-1.48004	-0.182499	0.483654	0.738722	-1.76987	FALSE	no hit
ARL6	84100	-3.77972	0.416033	-6.04865	-5.70654	2.85763	1.6596	6.90019	0.0130969	-0.119238	1.15853	-0.266567	-1.24968	0.197236	0.887133	0.311959	-0.607385	TRUE	no hit
ARRDC1	92714	-4.63898	-2.67929	-9.49481	-1.74283	-0.303657	-0.292871	-0.329967	-0.288132	-0.0379359	0.0584982	-0.0145325	-0.157773	1.10287	2.10425	1.11755	0.0868107	TRUE	no hit
ART4	420	-0.327063	0.0411387	-0.230352	-0.791976	0.734321	1.09161	0.155278	0.956074	-0.416489	0.653281	-0.796579	-1.10617	-0.550905	0.548549	-1.02712	-1.17414	FALSE	no hit
ASIP	434	-2.6969	-1.22613	-2.52137	-4.34321	-0.0770572	0.257371	-0.213508	-0.275035	-0.499317	0.0939673	-0.0346588	-1.55726	-0.0823134	0.953132	0.0223692	-1.22244	FALSE	no hit
ATF1	466	-2.89356	-1.2222	-2.75557	-4.7029	-0.0798524	0.257371	-0.601704	0.104775	-0.922306	-1.16841	-0.637096	-0.961413	-0.56015	-0.800917	-0.473845	-0.405687	FALSE	no hit
AHCY	191	-4.6656	-1.8211	-5.35977	-6.81594	-1.54211	-3.02633	-0.630819	-0.969171	-0.244528	-0.40461	-0.176846	-0.152127	0.637793	0.7552	0.295867	0.862313	TRUE	no hit
AIPL1	23746	-1.86362	0.76228	-4.49792	-1.85521	-0.944261	-1.4821	-0.669638	-0.681039	-0.0844464	0.0431897	-0.0761253	-0.220404	-0.161328	-0.803471	0.257503	0.0619853	FALSE	no hit
AKR1D1	6718	-4.51509	-0.536045	-5.92985	-7.07937	-1.22549	-2.42284	-0.572589	-0.681039	-0.0890953	0.402894	-0.226508	-0.443673	0.59805	0.827441	0.353175	0.613534	TRUE	no hit
ALDH18A1	5832	-1.56269	0.0252676	-3.67022	-1.04312	0.0937622	0.434869	-0.834622	0.681039	-0.0893547	0.0635897	-0.108063	-0.223591	-0.033274	-0.14595	0.14757	-0.101442	FALSE	no hit
ALDH6A1	4329	-3.63726	0.0469713	-5.74903	-5.20973	-0.122094	0.39937	-0.582294	-0.183357	-0.542595	0.105303	-0.939046	-0.794042	-0.24095	-0.145129	-0.381826	-0.195895	FALSE	no hit
ALOX15B	247	-3.32309	1.18493	-9.11648	-2.03771	0.0379954	-0.150873	0.0291147	0.235744	-0.326657	-0.880775	0.511707	-0.610902	-0.358136	-2.25732	1.60767	-0.42476	FALSE	no hit
AMD1	262	-3.2892	0.162399	-6.59727	-3.43273	-0.261767	-0.630116	0.106754	-0.261938	-0.0934265	0.287686	-0.0690727	-0.498893	0.140822	-0.0957194	0.596481	-0.0782943	TRUE	no hit
AMZ1	155185	-3.2303	-1.23668	-4.94072	-3.5135	-0.748864	-1.23361	-0.436721	-0.576264	-1.48891	-1.81014	-1.20596	-1.45064	-1.15672	-1.57464	-0.715255	-1.18028	FALSE	no hit
ANGPTL7	10218	-1.55355	0.265672	-2.19004	-2.73629	0.120628	0.452619	-0.0776392	-0.0130969	-0.29811	0.173403	-0.693998	-0.373737	-0.294015	-0.256793	-0.606431	-0.0188227	FALSE	no hit
ANTXRL	195977	1.27286	-0.0406002	3.55941	0.29976	0.0657583	0.0798739	0.0388196	0.0785814	-1.43088	-2.19229	-1.28068	-0.819668	-1.97147	-2.9711	-1.9465	-0.996814	FALSE	no hit
AOC1	26	-2.2533	-0.700635	-2.55108	-3.5082	-0.0132364	-0.34612	-0.427016	0.733427	-1.51524	-1.7532	-1.59389	-1.19864	-1.4196	-1.89342	-1.44891	-0.916465	FALSE	no hit
APEX1	328	-5.49059	-2.31362	-7.57519	-6.58296	-1.6626	-1.74835	-1.7857	-1.45376	-1.37141	-1.33983	-1.06005	-1.71435	-0.461096	-0.0568993	-0.261689	-1.0647	FALSE	<-3 in 2 replicates | <-2 in all replicates
APOBEC3A	200315	-0.115101	0.622922	-1.94903	0.980811	3.74451	1.09161	0.135869	10.006	-0.815279	-0.214014	-0.794164	-1.43766	-1.19055	-1.02806	-0.75442	-1.78916	FALSE	no hit
APOM	55937	-3.11449	-0.785105	-6.61347	-1.94488	1.90185	-0.647866	-0.116459	6.46987	-1.39517	-1.21985	-1.21026	-1.7554	-1.14022	-1.1469	-0.492114	-1.78166	FALSE	no hit
AQP7	364	-3.5567	0.271401	-5.3319	-5.60959	-0.253984	0.896363	-0.95108	-0.707233	-1.3386	-0.764104	-1.16843	-2.08326	-1.23642	-1.37954	-0.61205	-1.71766	FALSE	no hit
ARHGAP1	392	-2.92129	-1.37872	-4.61138	-2.77376	-0.7287	-0.488118	-0.650229	-1.04775	-1.7306	-1.89401	-1.22386	-2.07392	-1.45569	-1.50506	-0.837613	-2.0244	FALSE	no hit
ARL6IP5	10550	-2.99632	-0.913447	-3.07794	-4.99757	1.17946	-1.14486	5.03684	-0.353617	-1.43005	-1.12431	-1.38607	-1.77976	-1.15571	-0.912635	-1.17151	-1.38298	FALSE	no hit
ARRDC4	91947	-3.80425	-2.75557	-6.9599	-1.69728	-1.56056	-1.32236	-1.89246	-1.46685	-1.6383	-1.27954	-1.53151	-2.10383	-0.864026	0.431585	-0.777781	-2.24588	FALSE	no hit
ART5	116969	-2.04713	-1.67872	-2.98763	-1.47504	-0.0351183	-0.239622	-0.271737	0.406004	-1.47296	-1.88564	-1.10448	-1.42877	-1.2512	-1.34579	-0.931366	-1.47645	FALSE	no hit
ASL	435	-5.48086	-1.30034	-5.43241	-9.70983	-0.897412	-0.38162	-0.621114	-1.6895	-1.72508	-1.80898	-1.45495	-1.9113	-1.09554	-1.46215	-0.956562	-0.867911	FALSE	no hit
ATF2	1386	-5.45593	-2.69851	-8.62732	-5.04196	-1.591	-1.34011	-1.49456	-1.93834	-1.54934	-1.66694	-1.16317	-1.81791	-0.535698	-0.135102	-0.113951	-1.35804	FALSE	<-3 in 2 replicates | <-2 in all replicates
AHCYL1	10768	-7.67165	-1.59851	-6.51946	-14.897	-2.66067	-3.00858	-1.35869	-3.61475	-0.287692	0.355602	-0.152221	-1.06646	1.10275	1.67783	0.540478	1.08994	TRUE	toxic
AK1	203	-6.36168	-2.76297	-6.28601	-10.0361	-2.70094	-3.66532	-1.54308	-2.89442	-0.881268	-1.71895	-0.531008	-0.393843	0.356039	-0.198669	0.147454	1.11933	TRUE	<-3 in 2 replicates | <-2 in all replicates
AKR1E2	83592	-2.07351	-0.956069	-2.41999	-2.84446	-0.144996	0.576867	0.0097049	-1.02156	-0.0966275	0.226384	-0.346901	-0.169366	0.272435	0.886125	-0.295152	0.226331	TRUE	no hit
ALDH1A1	216	-3.83383	-1.5665	-4.42544	-5.50954	0.246256	0.683366	0.291147	-0.235744	0.451174	1.06908	0.528655	-0.244208	1.30604	2.49158	0.87275	0.553797	FALSE	no hit
ALDH7A1	501	-3.70886	-2.86944	-3.0692	-5.18793	-0.723554	-0.914112	-0.601704	-0.654845	-0.751163	-0.782077	-0.743937	-0.727475	0.193653	1.2097	-0.533998	-0.09474	TRUE	<-3 in 2 replicates | <-2 in all replicates
ALOX5	240	-1.11156	-0.814891	-0.658296	-1.86149	0.329128	0.665616	0.465835	-0.144066	0.286389	-0.130674	0.785607	0.204235	0.451254	0.263527	0.514527	0.575708	FALSE	no hit
AMELX	265	-0.923769	-1.69404	-1.0051	-0.0721664	-0.315741	0.0443744	-0.310557	-0.681039	-0.266707	-0.302224	0.0882296	-0.586125	0.000825193	0.760109	-0.0717053	-0.685928	TRUE	no hit
AMZ2	51321	-1.49649	-0.980982	-4.02613	0.517648	0.250252	1.6241	-0.611409	-0.261938	-0.133545	1.11724	-0.905615	-0.612261	0.267405	2.15015	-0.563907	-0.784025	TRUE	no hit
ANGPTL8	55908	-1.10336	-1.17556	-2.31628	0.181767	0.350205	0.204122	0.126164	0.72033	-0.554418	0.201579	-1.03146	-0.833373	-0.306079	1.06684	-0.949347	-1.03573	FALSE	no hit
ANXA1	301	-0.710316	-1.27244	-0.710624	-0.147883	-0.608072	-0.825364	-0.252327	-0.746524	-1.25945	-1.47174	-0.964527	-1.34208	-1.2357	-1.13392	-1.10233	-1.47085	FALSE	no hit
AOC2	314	0.67148	-1.88904	2.78254	1.12094	0.133041	0.417119	-0.135869	0.117872	-1.00527	-1.42146	-0.836653	-0.75771	-0.797382	-0.534894	-0.846265	-1.01099	FALSE	no hit
APEX2	27301	-2.68402	-1.207	-2.47723	-4.36784	0.104574	0.772114	0	-0.458392	-0.556888	0.246849	-0.678394	-1.23912	-0.0992492	1.11281	-0.595963	-0.814591	FALSE	no hit
APOBEC3G	60489	-1.11127	-1.2033	-1.37374	-0.756771	3.70988	1.6241	0.232918	9.27261	-1.21896	-1.35654	-1.02273	-1.27762	-1.13985	-0.9775	-1.05804	-1.384	FALSE	no hit
APOO	79135	-1.73321	-1.04125	-1.21924	-2.93916	2.88653	0.789864	-0.145574	8.01531	-1.54075	-1.28533	-1.9793	-1.35761	-1.39082	-1.00959	-2.02447	-1.13841	FALSE	no hit
AQP8	343	-0.26945	-0.165877	-0.815109	0.172637	0.0491665	1.6951	-0.630819	-0.916784	-0.914226	-0.464357	-0.573677	-1.70464	-1.10919	-0.661691	-0.707946	-1.95792	FALSE	no hit
ARHGAP23	57636	-1.9072	-0.192718	-3.39882	-2.13006	-0.82894	-1.44661	-0.621114	-0.419101	-1.88378	-1.67062	-2.01057	-1.97016	-1.98131	-2.19959	-1.73046	-2.01389	FALSE	no hit
ARL8A	127829	-4.53693	-2.88343	-2.2076	-8.51975	-0.280553	-2.40509	4.18281	-2.61938	-2.39985	-2.90606	-1.96764	-2.32586	-1.70179	-1.74415	-1.85953	-1.50168	FALSE	no hit
ARSA	410	-1.3085	-0.837197	-1.74894	-1.33937	-0.5674	-0.221872	-1.04813	-0.432198	-1.81182	-1.48519	-1.75773	-2.19253	-1.80728	-1.34407	-1.74332	-2.33445	FALSE	no hit
ARTN	9048	-7.33086	-3.09772	-11.0469	-7.84794	-2.80491	-3.54108	-1.75659	-3.11706	-2.82978	-3.23017	-2.13335	-3.12582	-1.81929	-2.03932	-0.775023	-2.64352	FALSE	toxic
ASNA1	439	-1.13574	-0.641634	-0.384332	-2.38127	-0.0799409	0.0798739	-0.097049	-0.222647	-1.74875	-2.23112	-1.53885	-1.47629	-1.86061	-2.55072	-1.68189	-1.34922	FALSE	no hit
ATF3	467	-2.97254	-2.20482	-4.63071	-2.0821	-0.58519	-0.38162	-0.640524	-0.733427	-2.06983	-2.72752	-1.86128	-1.62069	-1.64025	-2.01174	-1.3741	-1.53491	FALSE	no hit
AHCYL2	23382	-4.82389	-2.06695	-7.06346	-5.34126	-1.34301	-2.17435	-0.689048	-1.16562	1.2916	2.06228	1.67657	0.135939	2.60479	4.40546	2.38894	1.01997	FALSE	<-3 in 2 replicates | <-2 in all replicates
AK2	204	-1.64215	-0.556595	-5.50307	1.13323	-0.243176	-1.14486	0.310557	0.104775	0.530945	0.699286	0.487324	0.406223	0.821639	1.14861	0.982637	0.33367	FALSE	no hit
AKR7A2	8574	-5.14699	-1.59822	-7.67379	-6.16895	-1.09878	-0.683366	-1.06754	-1.54544	0.125625	0.0718087	0.128788	0.17628	1.12986	1.16719	0.996922	1.22546	FALSE	no hit
ALDH1A2	8854	-1.79462	-0.569711	-2.73043	-2.08373	0.581401	1.37561	-0.155278	0.523876	0.601305	1.56388	0.0609406	0.179092	0.990148	2.29283	0.144409	0.53321	FALSE	no hit
ALDH8A1	64577	-1.64326	0.305884	-2.0793	-3.15636	0.6256	1.10936	0.164983	0.602458	0.920492	0.62363	2.09753	0.0403113	0.943068	0.300446	2.0416	0.487159	FALSE	no hit
ALOX5AP	241	-4.84034	-0.87439	-7.33125	-6.31539	0.0276751	0.612367	-0.359081	-0.17026	0.0794057	0.12381	0.00604037	0.108367	0.826849	0.663598	0.742864	1.07409	FALSE	no hit
AMELY	266	-1.2264	-0.330291	-4.4853	1.13638	1.22659	2.13885	0.912261	0.628652	0.86505	1.03382	1.07409	0.487243	1.06095	1.39528	1.38531	0.402258	FALSE	no hit
ANG	283	-0.244837	-0.532289	0.111744	-0.313968	0.39762	0.328371	0.262032	0.602458	-0.506231	-0.255534	-0.720498	-0.542661	-0.538057	-0.029454	-0.983202	-0.601515	FALSE	no hit
ANK3	288	0.669078	-0.325492	0.728064	1.60466	1.43704	1.85485	1.02872	1.42756	0.223297	0.754771	-0.30106	0.216181	0.140319	1.03088	-0.694484	0.0845571	FALSE	no hit
ANXA11	311	-1.28233	-0.220093	-4.07244	0.445557	-0.128436	-0.434869	0.232918	-0.183357	-0.814528	-1.32037	-0.717637	-0.405576	-0.872616	-1.74305	-0.389038	-0.485758	FALSE	no hit
AOC3	8639	-0.786508	0.273933	-0.418126	-2.21533	0.488738	1.7306	-0.0679343	-0.196454	-1.37288	-2.14613	-0.9121	-1.06043	-1.74779	-3.25881	-1.05124	-0.933321	FALSE	no hit
APH1A	51107	-3.36919	-1.79455	-3.77147	-4.54155	-1.38113	-1.9791	-1.07724	-1.08704	-0.458642	-0.0810932	-0.104468	-1.19037	0.195488	1.19275	0.117352	-0.723638	TRUE	no hit
APOBR	55911	0.714026	0.557891	2.02289	-0.438702	3.44806	0.505868	0.329967	9.50836	-0.391241	-0.0129787	-0.581948	-0.578797	-0.811447	-0.685034	-1.13781	-0.611494	FALSE	no hit
APP	351	-1.46665	-0.744082	-0.589458	-3.06641	4.40133	1.14486	0.795802	11.2633	-0.713919	-0.953348	-0.667134	-0.521275	-0.61208	-0.828662	-0.859039	-0.148538	FALSE	no hit
AQP9	366	-1.85806	-0.87712	-1.2578	-3.43926	-0.552909	-1.18036	-0.242623	-0.235744	-1.17145	-1.19851	-1.11004	-1.20579	-1.05951	-1.0264	-1.21336	-0.938784	FALSE	no hit
ARHGAP36	158763	-0.938245	0.347643	-1.26	-1.90237	0.0702533	0.736615	-0.106754	-0.419101	-1.34005	-1.66977	-1.23857	-1.11182	-1.66597	-2.64666	-1.30798	-1.04328	FALSE	no hit
ARL8B	55207	0.121022	0.603757	0.916836	-1.15753	2.29978	0.985112	6.12379	-0.209551	-0.664191	-0.630236	-0.559073	-0.803264	-1.0878	-1.53889	-0.9565	-0.768001	FALSE	no hit
ARSB	411	-4.92074	-1.59855	-7.03571	-6.12796	-1.63103	-1.96135	-1.24223	-1.6895	-1.138	-1.74333	-0.990591	-0.680082	-0.445052	-1.22323	-0.233855	0.121928	FALSE	no hit
ASAH1	427	-1.94248	-0.087943	-6.80159	1.06208	-1.30692	-1.9436	-1.3878	-0.589361	-0.929391	-1.53038	-0.790526	-0.467266	-0.918891	-2.02047	-0.105994	-0.630206	FALSE	no hit
ASNS	440	-3.78012	-0.0992781	-9.79693	-1.44415	-0.0401067	0.559117	-0.941376	0.261938	-1.12002	-1.34855	-1.33867	-0.672838	-0.844062	-1.86156	-0.0896847	-0.580938	FALSE	no hit
ATF4	468	-3.46103	-1.05853	-5.82139	-3.50318	-0.776802	-1.30461	-0.999605	-0.0261938	-1.73169	-2.42945	-1.4314	-1.33422	-1.49281	-2.55795	-0.858061	-1.0624	FALSE	no hit
AHNAK	79026	-1.60265	0.353281	-3.13296	-2.02826	0.0732585	1.23361	-0.097049	-0.916784	1.08411	2.47813	0.117997	0.656185	1.36426	2.71476	0.272116	1.10592	FALSE	no hit
AK4	205	-3.72587	-0.238203	-4.43134	-6.50808	0.49591	1.37561	0.203803	-0.0916784	0.986066	1.86051	0.385177	0.712508	1.67006	2.38905	0.698594	1.92255	FALSE	no hit
AKR7A3	22977	-1.45588	-1.08127	0.528304	-3.81466	-0.101939	0.292871	-0.310557	-0.288132	0.973309	1.91748	0.33195	0.670492	1.51228	3.1985	-0.049928	1.38826	FALSE	no hit
ALDH1A3	220	-3.91631	-2.00532	-1.91536	-7.82824	-0.907249	-0.949612	-0.47554	-1.29659	0.412042	0.726338	0.152595	0.357193	1.44038	2.51641	0.113581	1.69113	FALSE	no hit
ALDH9A1	223	-8.40837	-3.30575	-9.98121	-11.9381	-1.27884	-1.34011	-0.689048	-1.80737	0.307473	0.261094	-0.323594	0.984919	2.66536	3.09304	0.857137	4.0459	FALSE	<-3 in 3 replicates
ALOXE3	59344	-0.858785	-0.565009	0.469856	-2.4812	1.15614	1.9081	0.931671	0.628652	0.769365	0.938316	0.660822	0.708957	0.960619	1.4286	0.243119	1.21013	FALSE	no hit
AMH	268	-8.78805	-3.68793	-7.9433	-14.7329	-2.02443	-2.51159	-0.863736	-2.69796	-0.121514	-0.426274	-0.22501	0.286742	1.9313	2.47154	0.587527	2.73482	TRUE	<-3 in 3 replicates
ANGEL1	23357	-3.03953	-1.0693	-5.88791	-2.16137	0.483358	0.647866	-0.271737	1.07395	-0.0434714	-0.357405	-0.479792	0.706783	0.506064	0.153604	0.133069	1.23152	TRUE	no hit
ANKFY1	51479	-2.47553	-1.01925	-6.17608	-0.231273	1.43548	2.0501	0.776392	1.47995	0.760504	0.996673	1.03392	0.250916	1.29482	1.93346	1.60236	0.348641	FALSE	no hit
ANXA13	312	-1.82378	0.304124	-3.61181	-2.16366	0.214366	0.665616	-0.572589	0.55007	-0.300926	-0.143754	-0.841581	0.0825568	-0.280064	-0.717497	-0.576045	0.45335	FALSE	no hit
AOX1	316	-2.26836	-1.92674	-0.694577	-4.18376	-0.156436	-0.133123	-0.0873441	-0.248841	-0.645237	-1.25276	-0.381986	-0.300963	-0.191341	-0.250057	-0.561024	0.237058	FALSE	no hit
APH1B	83464	-5.07255	-1.44822	-9.00931	-4.76011	-0.254856	0.115373	-0.0679343	-0.812008	-0.123757	0.450873	-0.219596	-0.602548	0.780421	1.5832	0.799785	-0.0417239	TRUE	no hit
APOC1	341	-3.09069	-0.263231	-6.15571	-2.85312	3.65031	1.32236	-0.194098	9.82268	-0.180667	0.431763	-0.875512	-0.0982527	0.192476	0.521786	-0.240968	0.296609	TRUE	no hit
APPL1	26060	-4.9483	-1.07467	-9.59531	-4.17493	2.55908	-0.36387	-1.04813	9.08925	-0.772725	-1.20699	-0.151451	-0.959737	-0.206092	-1.01479	0.963204	-0.566687	FALSE	no hit
AR	367	-5.74048	-2.09335	-9.80903	-5.31905	0.255517	0.630116	0.359081	-0.222647	0.262037	0.947204	0.642743	-0.803834	1.51444	2.87424	1.82279	-0.153718	FALSE	<-3 in 2 replicates | <-2 in all replicates
ARHGDIA	396	-0.0730101	-1.03986	-3.55648	4.37731	0.340937	-0.0798739	0.329967	0.772718	-0.367991	-0.306578	-0.362608	-0.434786	-0.32777	0.250104	-0.131804	-1.10161	FALSE	no hit
ARMC3	219681	-2.68544	0.37256	-9.07246	0.643592	2.6106	0.949612	6.76432	0.117872	-0.0246721	0.786491	0.0247667	-0.885274	0.141625	0.470987	1.07046	-1.11657	TRUE	no hit
ARSD	414	-1.56373	-1.19222	-7.00749	3.50851	0.351789	-0.00887488	-0.0097049	1.07395	-0.302198	-0.385472	-0.122612	-0.398511	-0.0239251	0.235835	0.635933	-0.943543	FALSE	no hit
ASB5	140458	-1.03747	-1.2543	-3.52481	1.66671	-0.205097	-0.00887488	-0.213508	-0.392907	-0.643549	-0.59116	-0.374427	-0.965061	-0.481993	0.0598887	-0.157711	-1.34816	FALSE	no hit
ASPA	443	-3.10799	-1.19208	-6.69963	-1.43228	0.713331	0.239622	0.97049	0.92988	-0.584886	-0.827232	0.213988	-1.14142	-0.157049	-0.230064	0.911108	-1.15219	FALSE	no hit
ATF5	22809	-0.756372	-1.12413	-2.87807	1.73308	0.856889	0.789864	0.300852	1.47995	-0.344244	-0.647502	-0.0473412	-0.337888	-0.226951	-0.150251	0.0499364	-0.580538	FALSE	no hit
AHR	196	-4.42007	-0.627207	-8.02891	-4.60408	-0.59326	-0.239622	-0.164983	-1.37518	0.883465	1.54973	0.133488	0.967179	1.79555	2.45398	1.00368	1.92899	FALSE	no hit
AK8	158067	-4.83648	-0.561046	-7.94266	-6.00573	-0.258307	0.168623	-0.223213	-0.72033	0.334577	-0.0162715	1.06402	-0.0440174	1.01826	0.309945	1.90568	0.839148	FALSE	no hit
AKT1	207	-6.91072	-0.695188	-12.8684	-7.16858	-0.303821	-0.630116	-0.0194098	-0.261938	1.34277	1.94898	1.23138	0.84797	2.67104	2.97495	2.90775	2.13041	FALSE	no hit
ALDH1B1	219	-4.44387	-0.35265	-9.06422	-3.91475	-0.204477	0.257371	-0.281442	-0.589361	0.350607	-0.170172	1.01748	0.204515	0.91882	-0.213506	2.08151	0.888454	FALSE	no hit
ALDOA	226	-6.31036	-0.470713	-13.5464	-4.91398	-0.725379	-1.19811	-0.349377	-0.628652	0.881659	0.84024	1.38208	0.42266	1.9175	1.27592	3.20804	1.26853	FALSE	no hit
ALPI	248	-7.00418	-1.86736	-12.3254	-6.81977	0.300937	1.05611	-0.0485245	-0.104775	0.677763	0.517518	0.965284	0.550488	2.12962	2.06329	2.5893	1.73626	FALSE	no hit
AMHR2	269	-9.71832	-1.89371	-15.4044	-11.8568	-0.0076318	0.186372	0.786097	-0.995365	0.781768	0.426183	1.20996	0.709155	2.73422	2.03427	3.35678	2.81162	FALSE	no hit
ANGEL2	90806	-8.07514	-1.62957	-11.1499	-11.446	-1.71381	-2.19209	-1.67895	-1.2704	-0.118998	-0.537467	-0.114021	0.294495	1.31803	0.447712	1.28865	2.21774	TRUE	no hit
ANKK1	255239	-6.68896	-1.34639	-9.34114	-9.37937	-0.118925	0.115373	-0.485245	0.0130969	0.513797	-0.270243	0.463162	1.34847	1.78174	0.626582	1.54535	3.17327	FALSE	no hit
ANXA2	302	-4.44144	-0.859837	-6.57738	-5.88711	0.423382	2.0146	-0.980195	0.235744	-0.461517	-0.740379	-0.268858	-0.375315	0.13904	-0.435804	0.400627	0.452298	TRUE	no hit
AP1M1	8907	-6.4931	-2.69946	-8.7978	-7.98205	0.509422	0.967362	0.45613	0.104775	-1.11709	-1.94246	-0.839959	-0.568841	0.0511719	-0.564602	0.195819	0.522298	TRUE	<-3 in 2 replicates | <-2 in all replicates
APLN	8862	-5.46007	-2.23937	-11.3266	-2.81426	0.105009	0.34612	-0.135869	0.104775	0.00773443	-1.06418	0.509163	0.578216	1.10812	0.294782	1.93728	1.0923	FALSE	no hit
APOC2	344	-7.14346	-2.67191	-11.3658	-7.39267	2.33578	-2.31634	-0.97049	10.2942	-0.351418	-1.65281	0.520948	0.0776136	0.989653	-0.226248	1.98713	1.20807	TRUE	<-3 in 2 replicates | <-2 in all replicates
APPL2	55198	-7.19507	-2.54143	-10.7731	-8.27071	2.55633	-0.630116	-1.26164	9.56074	-0.713552	-1.54323	-0.631748	0.0343258	0.66035	-0.0868763	0.72864	1.33928	TRUE	<-3 in 2 replicates | <-2 in all replicates
ARAF	369	-5.75347	-1.35381	-11.1109	-4.79573	0.515984	1.05611	-0.0582294	0.55007	-0.719833	-1.10025	-0.623451	-0.4358	0.13696	-0.5542	0.734864	0.230218	TRUE	no hit
ARHGDIB	397	-6.68376	-1.75314	-10.5846	-7.71354	-0.797943	-0.612367	-0.786097	-0.995365	-0.995588	-1.71278	-0.934139	-0.339846	0.0169993	-1.03179	0.302855	0.77993	TRUE	no hit
ARMC9	80210	-4.52927	-1.5437	-10.8863	-1.15782	2.24043	-0.0266246	7.03605	-0.288132	-0.825618	-1.80971	-0.275299	-0.391844	-0.153658	-1.2706	1.07815	-0.268522	FALSE	no hit
ARSE	415	-6.88244	-2.11021	-11.9735	-6.56359	-0.944604	-0.967362	-1.06754	-0.798911	-0.576254	-1.46408	-0.409584	0.144906	0.678846	-0.324505	1.10608	1.25496	TRUE	<-3 in 2 replicates | <-2 in all replicates
ASGR1	432	-4.68846	-0.113772	-9.71792	-4.23369	0.214007	1.25136	-0.242623	-0.366713	-0.208406	-1.85394	1.97178	-0.743062	0.45349	-2.54101	4.13602	-0.234535	TRUE	no hit
ASPH	444	-4.16604	-1.04278	-10.6103	-0.845018	-0.341271	-0.275121	-0.630819	-0.117872	-0.821532	-0.863205	-1.10271	-0.49868	-0.129651	-0.120733	0.160153	-0.428371	FALSE	no hit
ATF6	22926	-6.13535	-1.9529	-14.7871	-1.66604	-0.975738	-1.07386	-1.06754	-0.785814	-1.53694	-2.13055	-1.58797	-0.892311	-0.609131	-1.41673	0.373518	-0.78418	FALSE	no hit
AHSA1	10598	-5.55251	-0.848505	-8.30523	-7.5038	-1.23644	-0.36387	-1.14518	-2.20028	0.123451	0.689897	-0.384525	0.0649797	1.09855	1.44566	0.545549	1.30443	FALSE	no hit
AKAP10	11216	-4.69894	-0.470403	-6.55289	-7.07352	-0.674338	-0.541368	-0.669638	-0.812008	0.255172	0.575859	0.315592	-0.125935	0.953485	0.901739	1.00877	0.949944	FALSE	no hit
AKT1S1	84335	-8.04945	-1.48442	-12.0051	-10.6589	-1.83584	-1.92585	-1.10636	-2.47532	-0.298472	-0.325615	-0.532992	-0.0368105	1.08033	0.669447	0.934493	1.63705	TRUE	no hit
ALDH1L1	10840	-6.75509	-1.29155	-8.4614	-10.5123	-1.406	-2.0146	-0.553179	-1.65021	-0.419544	-1.05001	1.98478e-05	-0.208638	0.603482	-0.544418	0.944376	1.41049	TRUE	no hit
ALDOB	229	-5.25072	-0.172029	-8.77934	-6.80077	-0.425695	0.328371	-0.9899	-0.615555	0.0306601	-0.109545	0.325584	-0.124059	0.666833	-0.219678	1.34298	0.877198	FALSE	no hit
ALPK1	80216	-7.15817	-1.16101	-11.5222	-8.79128	0.0148597	0.843113	-0.300852	-0.497683	0.599979	0.00800412	1.67257	0.11936	1.82935	0.809835	3.15782	1.52039	FALSE	no hit
AMIGO2	347902	-7.12915	-1.07853	-10.4768	-9.83206	-1.14507	-0.488118	-0.786097	-2.16099	0.325304	0.521973	0.183628	0.270311	1.55381	1.34801	1.41494	1.89849	FALSE	no hit
ANGPT1	284	-7.202	-1.06894	-12.6275	-7.90956	-0.731714	-0.718865	-0.572589	-0.903687	-0.284316	-0.526571	-0.207415	-0.118961	0.799193	-0.107707	1.39615	1.10914	TRUE	no hit
ANKLE2	23141	-7.21759	-0.904837	-12.9714	-7.77656	-0.474292	0.452619	-0.591999	-1.2835	0.30696	0.278223	0.249283	0.393375	1.51878	0.911482	1.91477	1.73008	FALSE	no hit
ANXA3	306	-4.17937	-1.41526	-7.41903	-3.70382	-0.759875	-1.44661	-0.427016	-0.406004	-0.738515	-1.38798	-0.75717	-0.0703944	-0.102509	-0.865029	0.0763625	0.481139	FALSE	no hit
AP1S1	1174	-7.22266	-1.88272	-9.56593	-10.2193	-1.30145	-1.23361	-1.16459	-1.50614	-1.25838	-2.19313	-0.904369	-0.677634	-0.201312	-1.52712	0.214092	0.70909	FALSE	no hit
APLNR	187	-5.26641	-1.45204	-7.65722	-6.68998	0.188431	1.00286	-0.097049	-0.34052	0.340312	-0.181807	0.973659	0.229084	1.2849	0.733304	1.80316	1.31824	FALSE	no hit
APOC3	345	-4.32191	-0.593524	-10.4083	-1.96391	2.83435	0.541368	-0.708458	8.67015	-0.307494	-0.590284	0.0993034	-0.431502	0.260973	-0.476883	1.39964	-0.139839	TRUE	no hit
APRT	353	-6.14119	-1.32147	-13.4316	-3.67052	0.566274	-2.42284	-1.30046	5.42212	-1.47835	-2.48913	-1.61362	-0.332293	-0.657368	-2.29069	0.159647	0.158936	FALSE	no hit
ARCN1	372	-9.10584	-1.94709	-18.361	-7.00947	-1.65485	-1.34011	-1.35869	-2.26577	-1.15622	-1.70801	-0.842803	-0.917856	0.256228	-0.890531	1.71369	-0.0544777	TRUE	no hit
ARHGEF12	23365	-3.23295	0.0733065	-9.35784	-0.414318	0.251993	0.0621241	0.562884	0.130969	-0.750021	-1.67433	-0.4131	-0.162632	-0.540621	-2.38753	0.903887	-0.138218	FALSE	no hit
ARNT	405	-7.18249	-1.96071	-13.7813	-5.80546	0.119222	-2.28084	4.62924	-1.99073	-1.22198	-2.03005	-0.493804	-1.14209	-0.143201	-1.23759	1.32122	-0.513233	FALSE	no hit
ARSF	416	-4.70111	0.449022	-8.2848	-6.26756	-1.29301	-0.594617	-1.31987	-1.96454	-0.907472	-1.33875	-0.818698	-0.564965	-0.647682	-2.31981	0.0855167	0.291245	FALSE	no hit
ASGR2	433	-1.41969	-0.28687	-6.32058	2.3484	-0.310171	-0.0798739	-0.863736	0.0130969	-1.34941	-2.33626	-0.42118	-1.29079	-1.52197	-2.94834	0.20038	-1.81796	FALSE	no hit
ASPN	54829	-4.28992	-1.95269	-9.29379	-1.62329	-0.626219	-0.630116	-1.26164	0.0130969	-1.38231	-2.5611	-0.880577	-0.705243	-0.816172	-2.07698	0.216733	-0.588264	FALSE	no hit
ATF6B	1388	-6.6807	-2.64006	-13.2368	-4.16521	-2.15371	-2.93758	-1.31016	-2.21338	-1.76566	-2.92109	-1.13023	-1.24565	-0.727295	-1.88679	0.522961	-0.818051	FALSE	<-3 in 2 replicates | <-2 in all replicates
AHSG	197	-2.67959	-0.780301	-8.71134	1.45286	-1.52692	-1.18036	-1.47515	-1.92525	0.260958	0.530826	0.246667	0.00538158	0.738979	1.09429	1.27398	-0.151334	FALSE	no hit
AKR1A1	10327	-2.97926	-1.56563	-8.04221	0.670075	-1.35736	-1.8016	-0.960785	-1.30969	-0.454526	-0.608089	-0.29656	-0.458928	0.136681	0.382056	0.632823	-0.604836	TRUE	no hit
AKT2	208	-4.31534	-2.09773	-6.25453	-4.59375	-0.719142	-1.35786	-0.485245	-0.314326	-0.10153	-0.378652	0.0748943	-0.000833011	0.908917	1.26403	0.733535	0.729184	TRUE	<-3 in 2 replicates | <-2 in all replicates
ALDH1L2	160428	-2.76411	-0.326605	-9.39019	1.42447	-1.54928	-1.37561	-1.24223	-2.03002	-0.38246	-0.647657	-0.346814	-0.152911	-0.0858075	-0.729578	0.746021	-0.273866	FALSE	no hit
ALDOC	230	-8.18243	-2.12293	-14.0595	-8.36489	-1.6935	-2.29859	-1.44603	-1.33588	-0.865677	-1.50258	-0.521257	-0.573197	0.507167	-0.420339	1.35604	0.585802	TRUE	<-3 in 2 replicates | <-2 in all replicates
ALPK2	115701	-3.60512	-1.32339	-7.95668	-1.53529	-1.82124	-2.86659	-1.56249	-1.03466	-0.340866	-0.650924	-0.122783	-0.248892	0.301721	0.141201	0.72851	0.0354528	TRUE	no hit
AMN	81693	-6.51095	-3.03142	-10.4065	-6.09487	-1.50522	-2.26309	-1.08695	-1.16562	-0.756308	-1.84632	0.210121	-0.63273	0.536389	-0.0562234	1.4581	0.207292	TRUE	<-3 in 3 replicates
ANGPT2	285	-5.04034	-2.67465	-10.4165	-2.02985	-2.53166	-2.56484	-2.62032	-2.40983	-1.65413	-2.3367	-1.94002	-0.685651	-0.736586	-1.08026	-0.64104	-0.488456	FALSE	no hit
ANO1	55107	-3.50081	-2.42081	-8.9272	0.845583	-1.00803	-1.12711	-0.980195	-0.916784	-0.883413	-2.1903	-0.49046	0.0305246	-0.17273	-1.02815	0.558719	-0.0487631	FALSE	no hit
ANXA4	307	1.40752	-0.22139	-3.33977	7.78373	-0.580121	0.00887488	-1.55278	-0.196454	-0.921794	-1.79561	-0.809348	-0.160428	-1.34877	-2.25426	-0.568545	-1.2235	FALSE	no hit
AP2B1	163	-0.933245	-0.237672	-5.66662	3.10456	-0.156616	1.32236	-0.980195	-0.812008	-1.43254	-1.7159	-1.34217	-1.23954	-1.61283	-2.20598	-0.789444	-1.84308	FALSE	no hit
APLP1	333	-6.61225	-2.94296	-9.76195	-7.13185	-1.16543	-0.967362	-0.708458	-1.82047	-0.984494	-1.42615	-0.272831	-1.2545	0.325211	0.449008	0.939358	-0.412733	TRUE	<-3 in 2 replicates | <-2 in all replicates
APOC4-APOC2	100533990	-5.46164	-1.69785	-13.7197	-0.967416	-0.115385	-3.06183	-1.99921	4.71489	-1.69107	-2.67864	-1.27777	-1.11681	-0.942031	-2.25934	0.545546	-1.1123	FALSE	no hit
AQP1	358	-2.0975	0.18057	-7.46716	0.994076	1.90806	-1.81935	-0.786097	8.32963	-0.870125	-0.983449	-0.264714	-1.36221	-0.915821	-1.59011	0.520064	-1.67742	FALSE	no hit
AREG	374	-1.54384	-2.0223	-5.78643	3.1772	-0.345943	-0.310621	-0.242623	-0.484586	-1.12221	-1.67663	-0.436067	-1.25394	-0.825413	-0.734181	0.13607	-1.87813	FALSE	no hit
ARHGEF18	23370	-1.86438	-1.88991	-7.01692	3.31369	-0.718082	-0.949612	-0.562884	-0.641748	-1.23087	-2.09187	-1.02501	-0.575718	-0.848397	-1.31974	-0.215062	-1.01039	FALSE	no hit
ARPC1A	10552	-3.06494	-1.3169	-7.44321	-0.43472	-0.738833	-0.843113	-0.417311	-0.956074	-1.3336	-1.74544	-0.94937	-1.306	-0.946514	-1.35262	-0.0897954	-1.39713	FALSE	no hit
ARSG	22901	-6.76172	-1.59929	-12.7924	-5.89348	-1.11299	-1.21586	-1.23252	-0.89059	-1.3445	-1.6344	-0.856184	-1.5429	-0.397387	-1.0577	0.797539	-0.932004	FALSE	no hit
ASH1L	55870	-2.40448	-1.67366	-6.03003	0.490262	-2.07964	-2.0856	-1.75659	-2.39673	-1.60316	-2.50995	-0.917553	-1.38196	-1.33475	-2.07633	-0.277835	-1.65008	FALSE	no hit
ASPRV1	151516	-3.05662	-1.87291	-7.12298	-0.173976	-0.281814	0.239622	-1.24223	0.157163	-1.23824	-1.56904	-0.724748	-1.42094	-0.772317	-0.740977	0.0363972	-1.61237	FALSE	no hit
ATF7	11016	-3.43472	-1.80272	-6.40422	-2.09724	-1.03185	-1.19811	-0.941376	-0.956074	-1.19711	-1.78792	-0.39286	-1.41053	-0.699519	-1.00928	0.231247	-1.32053	FALSE	no hit
ATG4A	115201	-0.241261	0.686828	-0.763265	-0.647345	0.904868	0.693947	0.489513	1.53114	-0.374858	-0.118157	-0.693431	-0.312986	-0.437073	-0.28297	-1.21028	0.182027	FALSE	no hit
ATP13A2	23400	-1.8338	-0.805943	-0.916761	-3.77869	1.20637	1.02255	0.868491	1.72807	-0.533291	-0.460374	-0.739399	-0.400101	0.442292	-0.129472	-1.30427	2.76061	TRUE	no hit
ATP2A3	489	-2.24668	-1.64753	-3.34457	-1.74794	-0.77016	-0.373996	-0.710584	-1.2259	-1.42496	-0.797623	-1.71816	-1.7591	-0.515401	-0.203326	-1.62795	0.285078	FALSE	no hit
ATP5F1	515	-2.66599	-3.04047	-3.31843	-1.63906	-0.239346	-0.15349	-0.638398	0.0738494	-1.63681	-1.15122	-1.70121	-2.05802	-0.482771	-0.0148569	-1.48375	0.0502887	FALSE	no hit
ATP6V0D1	9114	-3.09624	-2.79213	-4.35701	-2.13959	0.189953	0.144843	-0.584258	1.00927	-1.94514	-1.24406	-2.17339	-2.41797	-0.5717	-0.317831	-1.79295	0.395677	FALSE	no hit
ATP6V1G2	534	-1.84658	-1.88619	-2.32324	-1.33031	0.76914	0.953367	0.187233	1.16682	-1.58404	-0.901373	-1.14467	-2.70606	-0.638162	-0.266069	-1.13498	-0.513433	FALSE	no hit
ATR	545	-0.396256	-0.907443	-0.565085	0.283758	1.87031	0.918777	1.21138	3.48077	-0.633463	-0.48744	-0.541996	-0.870953	-0.698419	-0.109047	-1.21781	-0.768402	FALSE	no hit
AVPR2	554	-1.21939	-1.78926	-1.22124	-0.64768	1.66512	1.46788	0.86398	2.6635	-1.38411	-0.870969	-0.831875	-2.44948	-0.836695	-0.291208	-1.2543	-0.964581	FALSE	no hit
B4GALNT1	2583	-2.19906	-1.61916	-4.42583	-0.552196	0.974968	0.663682	0.0112791	2.24994	-1.26967	-0.711404	-1.88243	-1.21517	-0.544475	-0.0490753	-1.23443	-0.349915	FALSE	no hit
BAIAP2	10458	-1.8971	-1.47721	-2.66136	-1.55274	0.218715	0.339407	-0.692537	1.00927	-1.46234	-0.68077	-1.20567	-2.50057	-0.457664	-0.162363	-0.920254	-0.290374	FALSE	no hit
BCAT1	586	-1.49085	-0.686964	-2.78527	-1.00031	0.767493	1.1609	0.0338373	1.10774	-1.26029	-0.349789	-1.34879	-2.08229	-0.629433	-0.10857	-1.3215	-0.458226	FALSE	no hit
BCL3	602	-2.38042	-4.03916	-2.06595	-1.03616	-0.415279	-0.495059	-0.7557	0.00492329	-1.60504	-1.26999	-0.861528	-2.68361	-0.235952	0.374177	-0.385711	-0.696323	FALSE	no hit
BICD1	636	-2.7271	-3.49434	-3.24078	-1.44619	0.464063	-0.244287	-0.318071	1.95455	-1.55336	-1.12847	-1.43177	-2.09984	-0.321612	0.160007	-1.11377	-0.0110695	FALSE	no hit
BLOC1S5	63915	-3.59703	-3.64805	-5.56385	-1.5792	-0.904914	-0.430204	-1.59035	-0.694184	-1.8223	-1.22181	-1.32579	-2.91929	0.333478	0.157377	1.30431	-0.461259	TRUE	no hit
BMP8B	656	-2.53258	-2.45134	-3.83511	-1.31128	1.43617	0.996603	0.0970003	3.21491	-1.66401	-0.950059	-1.60192	-2.44006	-0.477161	-0.122866	-0.863954	-0.444663	FALSE	no hit
BPIFA1	51297	-1.72165	-2.03645	-2.45321	-0.675283	0.564335	0.252934	-0.701561	2.14163	-1.44191	-0.980902	-1.19402	-2.1508	-0.70975	-0.328433	-1.00076	-0.800053	FALSE	no hit
BRD2	6046	-3.46037	-3.99469	-4.48681	-1.89961	0.153138	0.222668	-0.733142	0.969888	-2.08378	-1.49993	-2.14975	-2.60166	-0.700677	-0.12594	-1.90109	-0.0750016	FALSE	no hit
BSN	8927	-1.68557	-2.04237	-2.41303	-0.6013	1.3039	0.741507	0.624863	2.54534	-0.939008	-0.710409	-1.43797	-0.668641	-0.541852	0.0669521	-1.71263	0.0201241	FALSE	no hit
BTN3A1	11119	-1.42262	-2.98903	-0.822708	-0.456139	1.45229	1.10037	0.218815	3.03767	-0.837516	-1.03914	-0.81009	-0.663315	-0.570004	-0.018623	-1.50682	-0.184572	FALSE	no hit
C12orf49	79794	-2.80368	-3.09289	-3.00635	-2.3118	0.463491	0.317789	-0.0744421	1.14713	-2.00088	-1.0236	-1.64756	-3.33147	-0.6218	0.079651	-1.74496	-0.200091	FALSE	<-3 in 2 replicates | <-2 in all replicates
C19orf24	55009	-2.25244	-2.9249	-2.36658	-1.46583	0.318502	0.611798	-0.340629	0.684337	-1.35664	-1.05851	-0.905341	-2.10606	-0.156918	0.0669543	-0.443696	-0.0940122	FALSE	no hit
ATG4B	23192	0.302115	1.26723	-0.296434	-0.0644453	1.26207	1.19982	0.602304	1.98409	0.0268079	0.0291505	-0.387205	0.438478	-0.387844	-0.360322	-0.946125	0.142915	FALSE	no hit
ATP13A3	79572	-0.223772	0.202218	0.255209	-1.12874	1.07308	0.6853	0.421839	2.11209	-0.853398	-0.560879	-0.641981	-1.35733	-0.853858	-0.632872	-1.95866	0.0299618	FALSE	no hit
ATP2B1	490	-0.323599	0.0160637	-1.0104	0.023541	1.76192	1.02255	0.516583	3.74662	-0.0243464	-0.453266	-0.598184	0.978411	-0.302873	-0.471493	-0.812681	0.375555	FALSE	no hit
ATP5I	521	-0.167219	-0.0806214	-0.305992	-0.115042	2.30904	1.29494	0.89105	4.74113	-0.469551	-0.552066	-0.905744	0.0491552	-0.854344	-0.521909	-2.08649	0.0453688	FALSE	no hit
ATP6V0D2	245972	-0.103729	0.163037	-0.716828	0.242603	2.44991	1.49815	1.23845	4.61312	-0.143284	-0.286864	-0.932585	0.789599	-0.722044	-0.327197	-1.92381	0.0848801	FALSE	no hit
ATP6V1G3	127124	-0.876358	-1.2942	-0.875633	-0.459246	1.96274	1.50247	0.954213	3.43153	-1.22146	-0.760622	-0.871408	-2.03236	-0.959297	-0.351957	-1.61636	-0.909574	FALSE	no hit
ATRAID	51374	-0.964975	-1.08698	-2.07949	0.271538	1.14678	0.931748	0.0518839	2.45672	-0.994811	-0.838411	-1.3667	-0.779318	-1.04023	-0.525453	-1.84824	-0.746996	FALSE	no hit
AXIN1	8312	-0.936915	-0.440398	-1.48418	-0.88617	2.22559	2.09049	1.29259	3.29368	-1.28142	-0.604424	-1.02969	-2.21015	-0.905569	-0.526286	-1.56329	-0.627127	FALSE	no hit
B4GALT1	2683	-0.580923	-0.566541	-1.50827	0.332043	1.57525	0.620445	0.358676	3.74662	-0.734648	-0.64803	-1.24263	-0.31328	-1.01427	-0.482673	-2.06465	-0.4955	FALSE	no hit
BAIAP2L1	55971	-2.05387	-2.6672	-2.15449	-1.33993	0.619847	0.149166	-0.48049	2.19086	-1.58293	-1.06178	-1.5095	-2.17751	-0.857043	-0.0966571	-2.21449	-0.259987	FALSE	no hit
BCAT2	587	-0.24104	-0.142229	-0.831053	0.250162	3.30284	1.80945	1.21138	6.88768	-0.653549	-0.448431	-1.04534	-0.466871	-1.06319	-0.45728	-2.13385	-0.598432	FALSE	no hit
BCR	613	-0.650838	-1.8765	-0.455491	0.379479	2.30275	1.48085	1.03091	4.3965	-0.888226	-1.23031	-1.06167	-0.372693	-1.25898	-0.70366	-2.42685	-0.646424	FALSE	no hit
BID	637	-0.911893	-0.888029	-0.58056	-1.26709	1.33278	1.06146	0.214303	2.72258	-1.67392	-0.771158	-1.00649	-3.24412	-1.19041	-0.574511	-2.01573	-0.981001	FALSE	no hit
BLVRA	644	-1.49472	-2.98915	-1.23254	-0.262466	1.42332	0.546943	0.0157908	3.70724	-1.12056	-1.15845	-0.951914	-1.25131	-0.80681	-0.172934	-1.60179	-0.645708	FALSE	no hit
BMPER	168667	-1.99988	-2.25482	-3.37648	-0.368346	0.986489	1.1609	-0.421839	2.2204	-1.23525	-0.845974	-1.63915	-1.22062	-0.605372	-0.0116766	-1.34366	-0.460781	FALSE	no hit
BPIFA2	140683	-1.36874	-2.20776	-1.19263	-0.705846	2.1571	1.2517	0.340629	4.87898	-0.68237	-0.762221	-0.66613	-0.618757	-0.296715	0.0247058	-0.954834	0.0399825	FALSE	no hit
BRD3	8019	-2.25862	-3.56711	-2.88887	-0.319872	0.175534	-0.175108	-1.13468	1.83639	-0.993375	-1.14442	-1.40965	-0.426058	-0.319189	0.248157	-1.12565	-0.0800772	FALSE	no hit
BSPH1	100131137	-1.4748	-1.802	-1.89272	-0.729696	1.74221	0.901483	0.539141	3.78601	-1.18434	-0.722813	-1.24631	-1.58391	-0.686384	-0.0523849	-1.6819	-0.324871	FALSE	no hit
BTN3A2	11118	-0.391251	-1.54182	0.886681	-0.518611	2.48661	1.99104	1.27905	4.18972	-0.636946	-0.840142	-0.298119	-0.772577	-0.744066	-0.360307	-1.68569	-0.186195	FALSE	no hit
C12orf66	144577	-2.06604	-2.24299	-2.38411	-1.57103	1.19652	0.672329	0.106024	2.8112	-1.28472	-0.636139	-1.22835	-1.98968	-0.292054	0.324227	-1.22622	0.0258252	FALSE	no hit
C19orf38	255809	-3.58361	-4.58529	-3.42678	-2.73875	-0.606624	-0.274552	-1.27454	-0.270781	-2.21266	-1.67396	-1.618	-3.34601	-0.330485	-0.0665227	-1.16737	0.242433	FALSE	<-3 in 2 replicates | <-2 in all replicates
ATG4C	84938	0.152968	1.3292	-0.290789	-0.57951	1.25289	1.17387	0.403792	2.18102	-0.338854	0.156454	-0.600638	-0.572379	-0.56203	-0.246308	-1.49823	0.0584496	FALSE	no hit
ATP13A4	84239	-0.126248	-0.336729	0.237797	-0.279811	2.05775	1.07443	0.909096	4.18972	-0.916004	-0.619142	-0.53269	-1.59618	-0.996531	-0.536115	-1.68242	-0.771059	FALSE	no hit
ATP2B2	491	-0.0334922	-1.22167	0.339001	0.782195	2.52435	1.75757	1.20235	4.61312	-0.0296283	-0.670155	-0.0753286	0.656599	-0.452537	-0.276587	-0.776758	-0.304267	FALSE	no hit
ATP5J	522	-0.857619	-1.28056	-0.220758	-1.07154	1.63345	1.23008	0.80984	2.86043	-0.898991	-0.625079	-0.438648	-1.63325	-0.48044	-0.160177	-1.12101	-0.160135	FALSE	no hit
ATP6V0E1	8992	-1.40841	-1.11388	-1.56916	-1.54219	0.930707	0.322113	0.15114	2.31887	-0.809727	-0.354101	-1.13189	-0.943188	-0.195772	0.123588	-1.76944	1.05854	FALSE	no hit
ATP6V1H	51606	-0.11604	0.151698	-0.398458	-0.101361	2.38299	1.26899	0.873003	5.00699	-0.779561	-0.471725	-0.79651	-1.07045	-1.01134	-0.556778	-1.82397	-0.653268	FALSE	no hit
ATRN	8455	-0.470815	-0.534953	-1.10329	0.2258	1.594	1.45059	0.746677	2.58473	-0.747877	-0.624106	-1.19126	-0.428269	-1.05466	-0.435694	-2.21982	-0.50847	FALSE	no hit
AXIN2	8313	-1.62656	-1.7238	-2.4162	-0.739663	1.47106	0.78042	0.0338373	3.59893	-1.60817	-1.05772	-1.39191	-2.37488	-0.991249	-0.536999	-1.58339	-0.853359	FALSE	no hit
B4GALT2	8704	-1.45363	-1.64417	-2.42071	-0.296	1.39861	1.00957	0.503048	2.68319	-0.833468	-1.00524	-1.61094	0.115773	-0.722629	-0.496863	-2.18475	0.513726	FALSE	no hit
BAK1	578	-0.876107	-1.95488	-0.740096	0.0666517	3.14086	1.83107	1.32417	6.26735	-1.10396	-0.865239	-1.02561	-1.42104	-1.08354	-0.196534	-2.11198	-0.942092	FALSE	no hit
BCHE	590	-0.242356	0.398515	-1.27843	0.152849	2.98055	1.61921	1.1437	6.17873	-0.953512	-0.439561	-1.40671	-1.01426	-1.34396	-0.634929	-2.61009	-0.786862	FALSE	no hit
BDH1	622	-1.21356	-2.11561	-1.34445	-0.18064	1.79491	1.03984	0.430862	3.91402	-1.29398	-1.19627	-1.5336	-1.15207	-1.32409	-0.513445	-2.82657	-0.632259	FALSE	no hit
BIRC2	329	-1.31874	-1.97602	-1.84767	-0.132524	2.30332	1.563	1.15724	4.18972	-1.19135	-0.916275	-1.29704	-1.36074	-0.972237	-0.21751	-1.91095	-0.788254	FALSE	no hit
BLVRB	645	-0.581072	-1.90642	-0.654504	0.817705	2.88882	1.54138	1.20235	5.92272	-0.624955	-1.10477	-0.878922	0.108826	-1.05728	-0.582425	-1.87869	-0.710712	FALSE	no hit
BMPR1A	657	-1.72113	-2.85914	-2.91113	0.606894	1.45841	1.00957	0.101512	3.26414	-1.22269	-1.32827	-1.91107	-0.428739	-1.28686	-0.438872	-2.54807	-0.873653	FALSE	no hit
BPIFA3	128861	-1.59068	-3.14849	-1.46516	-0.158378	2.5689	1.82675	0.981283	4.89867	-1.19076	-1.19195	-1.40136	-0.978961	-1.05278	-0.0996686	-2.49797	-0.560711	FALSE	no hit
BRD4	23476	-2.45784	-3.14877	-3.03818	-1.18655	2.41501	1.51977	1.00384	4.72144	-1.82648	-1.57609	-1.80083	-2.10252	-1.10696	-0.653437	-2.20396	-0.463473	FALSE	no hit
BSPRY	54836	-1.8556	-1.55118	-2.89755	-1.11808	0.826496	0.196726	-0.656444	2.9392	-1.74081	-0.796131	-1.79797	-2.62834	-1.08763	-0.273065	-2.21978	-0.770048	FALSE	no hit
BTN3A3	10384	-1.56706	-2.17573	-1.53574	-0.9897	2.08218	1.72298	1.06249	3.46107	-1.35567	-1.14968	-1.01254	-1.90478	-0.795955	-0.48616	-1.47404	-0.427662	FALSE	no hit
C12orf73	728568	-2.2274	-3.3814	-2.64485	-0.655963	0.859582	0.598827	-0.466955	2.44688	-1.61995	-1.34729	-1.6817	-1.83087	-0.93446	-0.0456675	-2.08945	-0.66826	FALSE	no hit
C1GALT1C1	29071	-1.78008	-3.13814	-2.39676	0.194642	1.43352	0.91013	-0.385746	3.77616	-1.18881	-1.40042	-1.48233	-0.683675	-0.938911	-0.413717	-1.82841	-0.574601	FALSE	no hit
ATG4D	84971	0.548843	1.11768	1.04717	-0.518319	2.38832	1.58894	0.697049	4.87898	-0.124442	-0.112738	0.0704475	-0.331035	-0.45018	-0.455676	-0.977284	0.0824213	FALSE	no hit
ATP13A5	344905	-0.257019	0.764678	-1.34561	-0.190124	0.979925	0.538296	0.200768	2.20071	-0.361225	-0.305121	-0.911381	0.132828	-0.546085	-0.537736	-1.30012	0.199604	FALSE	no hit
ATP2B3	492	-0.331411	-0.242528	-0.44493	-0.306774	2.26245	1.51544	1.06249	4.20941	-0.93636	-0.492004	-0.605423	-1.71165	-0.915962	-0.42169	-1.46384	-0.862352	FALSE	no hit
ATP5J2	9551	-1.14581	-1.37298	-1.04422	-1.02022	1.27166	0.73286	0.241373	2.84074	-1.35027	-0.964164	-0.790642	-2.29599	-0.781008	-0.557572	-1.23287	-0.552581	FALSE	no hit
ATP6V0E2	155066	-1.28996	-0.718208	-1.80556	-1.34612	1.39536	0.979309	0.494025	2.71273	-1.44037	-0.594869	-1.01535	-2.71088	-0.724357	-0.354934	-1.23095	-0.587189	FALSE	no hit
ATP7A	538	0.681039	0.964684	0.139385	0.939048	2.59015	1.59759	1.11663	5.05622	-0.0717039	-0.0679098	-0.72426	0.577058	-1.0238	-0.398368	-2.12811	-0.544912	FALSE	no hit
ATXN10	25814	-0.520647	-0.535585	-1.25368	0.227319	2.22178	1.26035	0.575235	4.82975	-0.944307	-1.01558	-1.00601	-0.811331	-1.13659	-0.972393	-1.68671	-0.750663	FALSE	no hit
AXL	558	-1.57967	-0.817078	-2.79524	-1.12671	1.65914	1.16955	0.327094	3.48077	-1.8117	-0.533333	-1.77664	-3.12513	-1.15313	-0.0659477	-2.35878	-1.03468	FALSE	no hit
B4GALT3	8703	-1.51449	-1.19641	-2.48605	-0.861023	1.44317	1.16955	0.575235	2.58473	-1.78967	-0.926227	-1.52931	-2.91345	-1.10392	-0.317664	-1.9628	-1.0313	FALSE	no hit
BAMBI	25805	-0.81147	-0.519524	-1.61486	-0.300025	2.22642	1.47653	0.579746	4.62297	-1.04292	-0.386485	-1.49026	-1.252	-1.08445	-0.216309	-2.48904	-0.548018	FALSE	no hit
BCKDHA	593	0.188295	0.0403989	0.588806	-0.06432	2.75292	2.2029	1.3738	4.68205	-0.587506	-0.557822	-0.331359	-0.873336	-0.96979	-0.671021	-1.62604	-0.612305	FALSE	no hit
BDH2	56898	-0.82341	-1.36705	-0.458976	-0.644209	2.69087	1.91754	1.58133	4.57374	-1.31875	-0.884185	-1.17196	-1.90011	-1.30334	-0.492723	-2.71684	-0.70047	FALSE	no hit
BIRC3	330	-1.0748	-1.50487	-1.87429	0.154754	2.36868	1.85701	0.773747	4.47527	-0.795773	-0.829478	-1.55352	-0.00431801	-1.04027	-0.341392	-2.52573	-0.253688	FALSE	no hit
BMP1	649	-1.63597	-1.75324	-1.97865	-1.17603	1.68677	1.58894	0.5617	2.90966	-0.961114	-1.09043	-1.59676	-0.19615	-0.82759	-0.620795	-2.45965	0.597674	FALSE	no hit
BMPR1B	658	-0.89665	-1.76683	-0.964391	0.0412687	2.37282	1.83539	0.778259	4.50481	-1.02378	-1.11833	-1.23258	-0.72041	-1.21901	-0.667925	-2.40042	-0.588697	FALSE	no hit
BPIFB1	92747	-2.28246	-2.44529	-3.30201	-1.10007	1.73208	1.44626	0.475978	3.27399	-1.49338	-1.16892	-1.60644	-1.70478	-0.72408	-0.381538	-1.56002	-0.230687	FALSE	no hit
BRDT	676	-1.34664	-1.81577	-1.79781	-0.426333	1.98985	1.48518	0.412815	4.07156	-1.26899	-1.02757	-1.50111	-1.27829	-1.12939	-0.414649	-2.42789	-0.545642	FALSE	no hit
BST1	683	-1.10146	-1.64504	-1.04106	-0.618265	1.87025	1.32953	0.642909	3.63831	-1.1654	-0.898855	-1.15992	-1.43742	-0.999326	-0.398461	-2.20672	-0.392801	FALSE	no hit
BTNL3	10917	-1.39717	-1.84898	-1.78735	-0.555173	1.77633	0.944719	0.430862	3.9534	-1.52315	-1.27165	-1.3541	-1.9437	-1.19609	-0.719152	-2.03513	-0.834	FALSE	no hit
C12orf76	400073	-1.48446	-2.76445	-1.69237	0.00344032	2.24182	1.37709	0.548165	4.80021	-1.16888	-1.22377	-1.26707	-1.0158	-1.00586	-0.299742	-1.9794	-0.738428	FALSE	no hit
C1QA	712	-2.05499	-2.74321	-2.27475	-1.14702	0.139806	0.274552	-0.805328	0.950195	-1.54874	-1.08499	-1.64237	-1.91886	-0.909021	-0.171841	-2.17434	-0.380879	FALSE	no hit
ATIC	471	-0.641345	-0.198026	-0.396568	-1.32944	0.995505	1.09172	0.196257	1.69854	-1.01642	-0.57253	-0.288136	-2.18859	-0.401115	-0.481612	-0.555486	-0.166247	FALSE	no hit
ATP1A1	476	0.244275	1.19772	-0.545839	0.0809463	2.22575	1.8181	1.16175	3.69739	-0.221709	0.110869	-0.448329	-0.327666	-0.501578	-0.253521	-0.915122	-0.336092	FALSE	no hit
ATP2B4	493	-0.842678	-0.427947	-2.07689	-0.0231972	2.0422	1.04416	0.764724	4.31773	-0.930854	-0.698766	-1.25366	-0.840139	-0.936246	-0.614359	-1.57332	-0.621054	FALSE	no hit
ATP5L	10632	-0.0628504	0.032613	-0.285716	0.0645514	2.6704	2.19858	1.17979	4.63282	-0.428402	-0.26961	-0.525873	-0.489724	-0.715754	-0.299221	-1.35466	-0.493382	FALSE	no hit
ATP6V1A	523	-0.821957	-0.49437	-1.56463	-0.406867	2.01996	1.42465	0.80984	3.8254	-1.02414	-0.686607	-0.766898	-1.61892	-0.664312	-0.549776	-0.768188	-0.674972	FALSE	no hit
ATP7B	540	0.240974	-0.0714588	-0.391751	1.18613	3.01211	1.54138	1.78887	5.70609	-0.135858	-0.450057	-0.966602	1.00908	-1.10296	-0.452721	-2.32987	-0.526308	FALSE	no hit
ATXN3	4287	-1.36005	-1.18435	-1.9399	-0.955894	1.68504	0.871217	0.900073	3.28383	-1.11986	-0.975711	-1.22938	-1.1545	-0.639655	-0.592733	-1.6967	0.37047	FALSE	no hit
AZGP1	563	-0.49548	-0.283705	-1.17306	-0.0296768	2.17986	1.45923	0.949701	4.13064	-0.541658	-0.1592	-0.941134	-0.524639	-0.678288	-0.0163329	-1.56564	-0.452896	FALSE	no hit
B4GALT4	8702	-0.983104	-0.972815	-1.9567	-0.0197996	1.59843	1.36411	0.462443	2.96874	-1.3014	-1.04093	-1.46109	-1.40218	-1.27571	-0.820938	-2.16697	-0.839234	FALSE	no hit
BANF1	8815	-0.145235	-0.874958	-0.202689	0.641943	3.31759	1.81377	2.06859	6.07042	-0.314463	-0.588611	-0.799088	0.444309	-0.92506	-0.321444	-2.04895	-0.404784	FALSE	no hit
BCKDK	10295	-0.400301	-1.64011	-0.0548953	0.494099	2.34503	1.51112	0.566211	4.95775	-0.311209	-0.890348	-0.714229	0.67095	-0.85443	-0.377809	-2.0243	-0.161185	FALSE	no hit
BDKRB1	623	-1.32997	-1.55036	-1.44889	-0.990658	1.09563	0.73286	0.471467	2.08255	-1.78478	-1.18105	-1.22399	-2.9493	-1.21767	-0.775552	-1.96042	-0.917034	FALSE	no hit
BIRC5	332	-2.58438	-3.1407	-3.13976	-1.47268	0.552392	0.356702	-0.358676	1.65915	-1.8299	-1.45551	-1.74481	-2.28939	-0.844752	-0.385399	-1.90698	-0.241872	FALSE	no hit
BMP10	27302	-0.917009	-1.0409	-1.00295	-0.707184	1.80982	1.18684	0.742165	3.50046	-1.34035	-0.866531	-1.37222	-1.78231	-1.28941	-0.519273	-2.72271	-0.626253	FALSE	no hit
BMPR2	659	-1.29817	-2.13083	-1.37513	-0.388561	1.75199	1.33817	0.417327	3.50046	-1.2656	-1.11249	-1.24407	-1.44023	-1.0662	-0.425229	-2.12234	-0.651043	FALSE	no hit
BPIFB2	80341	-0.765523	-0.632623	-1.80565	0.141699	1.9133	1.26467	0.83691	3.63831	-0.843796	-0.792866	-1.36011	-0.378411	-1.09534	-0.681468	-2.14465	-0.459909	FALSE	no hit
BRICD5	283870	-2.19121	-2.08447	-3.55405	-0.93512	0.760341	0.42588	-0.286489	2.14163	-1.78777	-0.896132	-1.86417	-2.60301	-0.902926	0.0105648	-1.83475	-0.884595	FALSE	no hit
BST2	684	-0.999533	-1.52976	-1.17825	-0.290597	2.40225	1.77919	0.489513	4.93806	-1.18639	-1.12641	-1.04286	-1.38991	-1.00389	-0.761054	-1.5428	-0.707833	FALSE	no hit
BTNL8	79908	-1.94309	-1.06006	-3.12313	-1.64609	0.494764	0.33076	-0.15114	1.30467	-1.96018	-1.1035	-1.74248	-3.03458	-1.07326	-0.812213	-1.84814	-0.55942	FALSE	no hit
C14orf37	145407	-0.451682	-1.21089	-0.0639672	-0.0801863	2.11356	1.55003	1.1031	3.68754	-0.779395	-0.862561	-0.625464	-0.850159	-0.911382	-0.537406	-1.63217	-0.564573	FALSE	no hit
C1QB	713	-1.50024	-1.39085	-2.36096	-0.748911	1.97728	0.892836	0.593281	4.44573	-1.41223	-0.667872	-1.44042	-2.1284	-0.880194	-0.157385	-1.7514	-0.731798	FALSE	no hit
ATM	472	0.332122	-0.0452255	1.26657	-0.22498	1.7548	1.26467	0.814352	3.18537	-0.403565	-0.49699	0.221368	-0.935074	-0.535414	-0.468769	-0.681638	-0.455834	FALSE	no hit
ATP1A2	477	-0.452599	-0.236102	-0.42717	-0.694524	0.356018	0.309142	-0.358676	1.11759	-0.793813	-0.488402	-0.73264	-1.1604	-0.74126	-0.363268	-1.6461	-0.214411	FALSE	no hit
ATP2C1	27032	-0.361208	-0.0213905	-0.744896	-0.317336	1.94435	1.563	0.927143	3.34291	-1.18786	-0.603964	-1.06404	-1.89557	-1.22618	-0.657635	-2.13888	-0.88203	FALSE	no hit
ATP5L2	267020	1.53362	1.84734	1.81552	0.937994	2.78758	1.7273	1.76631	4.86913	0.057844	0.0517582	0.0249725	0.0968014	-1.00477	-0.600358	-1.6827	-0.731253	FALSE	no hit
ATP6V1B1	525	0.761239	0.645663	1.2542	0.383856	2.97509	2.67418	1.50012	4.75098	-0.64279	-0.520259	-0.226012	-1.1821	-1.23126	-0.822428	-1.85608	-1.01528	FALSE	no hit
ATP8A1	10396	0.669001	0.670374	0.53218	0.80445	2.46899	2.13373	0.669979	4.60328	-0.318132	-0.349787	-0.643962	0.0393545	-1.14391	-0.599759	-2.13875	-0.693226	FALSE	no hit
ATXN3L	92552	0.0389375	-0.986778	1.26504	-0.161445	2.02697	1.18684	0.940678	3.9534	-1.07389	-1.07642	-0.489119	-1.65613	-1.37753	-0.844205	-2.35255	-0.935847	FALSE	no hit
AZIN1	51582	-0.406415	-0.269681	-1.2656	0.31604	1.11327	0.265905	0.223326	2.85059	-0.842463	-0.837854	-1.41284	-0.276697	-1.24804	-0.796576	-2.54179	-0.405766	FALSE	no hit
B4GALT5	9334	-0.0441221	-0.660151	0.722185	-0.1944	2.56239	1.53274	0.940678	5.21376	-1.11863	-1.00664	-0.842655	-1.5066	-1.52165	-0.964793	-2.75937	-0.840775	FALSE	no hit
BAP1	8314	-0.590099	-1.1036	-1.18408	0.517384	1.25884	0.836628	-0.196257	3.13614	-0.830629	-0.967336	-1.23612	-0.288429	-1.18436	-0.658446	-2.27895	-0.615696	FALSE	no hit
BCL2	596	-0.523341	-1.10609	-0.936433	0.472499	0.510765	0.296171	-0.570723	1.80685	-0.804135	-1.03362	-1.22688	-0.151899	-1.29094	-0.776181	-2.50381	-0.592811	FALSE	no hit
BDKRB2	624	-1.04886	-0.920798	-1.3371	-0.888665	0.993075	0.819333	-0.0112791	2.17117	-1.63498	-0.932521	-1.32993	-2.64248	-1.29748	-0.692258	-2.32005	-0.880144	FALSE	no hit
BIRC6	57448	0.0669843	-0.477436	0.605977	0.0724123	1.22047	0.642063	0.227838	2.79151	-0.693748	-1.01796	-0.389083	-0.674204	-1.0701	-1.00554	-1.70389	-0.500862	FALSE	no hit
BMP15	9210	-0.278264	0.0757432	-1.17821	0.267678	2.29721	1.15226	0.525607	5.21376	-1.02501	-0.818887	-1.2741	-0.982032	-1.35457	-0.925611	-2.32286	-0.815252	FALSE	no hit
BMX	660	0.378709	0.667091	0.540151	-0.0711154	2.11586	1.5068	0.769235	4.07156	-0.683119	-0.452354	-0.67128	-0.925723	-1.17851	-0.769934	-2.24914	-0.516449	FALSE	no hit
BPIFB3	359710	-0.95466	-1.44457	-2.76312	1.34371	1.55157	1.13928	0.024814	3.49061	-0.690663	-1.03093	-1.76825	0.727194	-1.18974	-0.610701	-2.32674	-0.631762	FALSE	no hit
BRINP2	57795	-1.82247	-1.97095	-1.58106	-1.91541	-0.786199	-0.806362	-1.46854	-0.0836959	-2.03124	-1.19649	-1.43894	-3.45831	-1.05617	-0.475076	-2.2754	-0.418043	FALSE	no hit
BTBD17	388419	-1.49014	-2.69947	-1.55811	-0.212836	1.21763	0.490735	0.0654188	3.09675	-1.3373	-1.35318	-1.28401	-1.3747	-1.08036	-0.457281	-2.06171	-0.722088	FALSE	no hit
BTNL9	153579	-1.19602	-1.75438	-2.03792	0.204249	1.88066	1.06578	0.701561	3.87463	-0.827959	-0.964124	-1.51766	-0.0020879	-0.938736	-0.330594	-2.19259	-0.293022	FALSE	no hit
C14orf93	60686	-0.983557	-1.74669	-1.59652	0.392536	1.5207	1.04416	-0.110535	3.62846	-0.816902	-0.823042	-0.803973	-0.823691	-0.544567	0.12878	-0.872665	-0.889816	FALSE	no hit
C1QBP	708	-2.05885	-1.75851	-3.78362	-0.634425	1.11992	0.715566	-0.570723	3.21491	-1.55251	-1.04846	-1.74126	-1.86782	-0.832441	-0.548264	-1.24726	-0.701797	FALSE	no hit
ATOX1	475	-0.239851	0.35656	-0.902252	-0.17386	1.48397	1.30791	0.48049	2.6635	-0.773108	-0.321771	-0.655256	-1.3423	-0.724377	-0.388389	-1.11053	-0.674209	FALSE	no hit
ATP1A3	478	0.0721456	0.793198	-0.956376	0.379615	1.49197	1.15226	0.5617	2.76197	-0.282861	0.0389934	-0.676374	-0.2112	-0.610071	-0.159514	-1.12933	-0.541375	FALSE	no hit
ATP2C2	9914	0.301115	0.685218	-0.434338	0.652465	1.98844	1.26899	0.949701	3.74662	-0.554641	-0.21239	-0.59411	-0.857424	-0.91951	-0.433654	-1.28666	-1.03821	FALSE	no hit
ATP5O	539	0.370747	0.0344299	0.471718	0.606093	1.43224	1.1609	0.354164	2.78166	-0.505282	-0.161268	-0.673542	-0.681035	-1.09612	-0.148876	-2.25113	-0.888345	FALSE	no hit
ATP6V1B2	526	-1.05791	-0.956481	-1.45605	-0.761189	1.28729	1.2344	0.475978	2.15148	-1.45167	-0.920623	-1.22262	-2.21178	-1.15728	-0.680462	-2.01067	-0.780702	FALSE	no hit
ATP8A2	51761	-0.0648425	-0.400161	0.35205	-0.146416	1.67297	1.29926	0.376722	3.34291	-0.912155	-0.627376	-0.622356	-1.48673	-1.13329	-0.546916	-2.02848	-0.824469	FALSE	no hit
AUP1	550	-0.382032	-0.903897	-0.411079	0.168879	1.41984	0.482088	0.552676	3.22476	-1.04691	-0.878515	-0.699282	-1.56294	-1.07063	-0.586223	-1.53356	-1.0921	FALSE	no hit
AZIN2	113451	-0.123271	-0.914457	-0.122335	0.666978	1.71396	0.974985	0.223326	3.94356	-0.71534	-0.841396	-0.678918	-0.625705	-1.11591	-0.614995	-1.76366	-0.969066	FALSE	no hit
B4GALT7	11285	0.459751	0.603928	0.308261	0.467063	1.86126	1.00957	0.45342	4.12079	-0.810713	-0.425682	-0.710575	-1.29588	-1.33856	-0.70062	-2.13998	-1.17509	FALSE	no hit
BASP1	10409	-0.693496	-0.904693	-2.11703	0.941241	1.3676	0.486412	-0.110535	3.72693	-0.834711	-0.950455	-1.4206	-0.133075	-1.2097	-0.738531	-1.97593	-0.914627	FALSE	no hit
BCL2A1	597	0.1013	-0.700081	0.263594	0.740385	1.91617	1.12631	0.521095	4.1011	-0.324535	-0.992913	-0.700265	0.719574	-1.10897	-0.89321	-2.11906	-0.314654	FALSE	no hit
BDNF	627	-0.445144	-0.0014494	-1.24988	-0.0841023	1.53329	0.836628	0.00676747	3.75647	-1.04504	-0.652554	-1.34817	-1.1344	-1.25121	-0.722123	-2.36119	-0.670331	FALSE	no hit
BIRC7	79444	-0.267103	-0.148935	-0.453533	-0.198843	1.47938	0.659358	0.160163	3.61862	-0.748588	-0.587472	-0.62187	-1.03642	-0.810348	-0.565851	-1.27713	-0.588061	FALSE	no hit
BMP2	650	0.174437	-0.374765	0.101499	0.796577	1.8292	1.07011	0.444397	3.9731	-0.997263	-0.90972	-1.04414	-1.03793	-1.66244	-0.893748	-2.8078	-1.28577	FALSE	no hit
BNC1	646	-0.459934	-1.15997	-0.230918	0.0110835	1.91136	1.16523	0.566211	4.00263	-0.531731	-0.0909671	-0.794394	-0.709831	-0.306454	1.38698	-1.87096	-0.435377	FALSE	no hit
BPIFB4	149954	-0.307926	-0.712774	-0.301898	0.0908959	1.68404	0.810686	0.593281	3.64816	-1.38216	-1.06629	-1.05164	-2.02856	-1.58406	-0.979348	-2.49404	-1.27879	FALSE	no hit
BRINP3	339479	-0.400137	-0.879871	0.0647299	-0.38527	0.991176	0.300494	0.354164	2.31887	-1.05105	-1.04538	-0.882289	-1.22548	-1.23748	-0.8133	-2.39449	-0.504634	FALSE	no hit
BTC	685	0.0939829	-0.771705	-0.0424488	1.0961	1.7995	1.22143	0.489513	3.68754	-0.50887	-1.15423	-0.952914	0.580538	-1.38319	-1.06391	-2.4307	-0.65497	FALSE	no hit
BUB1	699	-1.4271	-1.26407	-2.79833	-0.218888	1.031	0.417233	-0.539141	3.21491	-1.35024	-1.17791	-1.97985	-0.892958	-1.29584	-0.943516	-2.55525	-0.388735	FALSE	no hit
C15orf61	145853	-1.66329	-2.21118	-2.05703	-0.721675	1.74624	0.845275	-0.101512	4.49496	-1.11574	-1.13059	-0.871511	-1.3451	-0.47226	-0.430475	-0.602028	-0.384277	FALSE	no hit
C1QC	714	-1.73863	-1.13188	-3.75825	-0.325769	0.870501	-0.0281038	-0.358676	2.99828	-1.12607	-1.13134	-1.67049	-0.576389	-0.675826	-0.82138	-1.12124	-0.0848602	FALSE	no hit
ATP10A	57194	-1.39652	-0.220104	-2.4067	-1.56275	-0.308493	-0.214021	-0.539141	-0.172315	-1.32344	-0.449438	-1.07625	-2.44462	-0.419382	-0.263957	-0.778677	-0.215513	FALSE	no hit
ATP1A4	480	-0.0151776	0.101795	-0.124392	-0.0229355	1.22009	0.412909	0.53463	2.71273	-0.963013	-0.620504	-0.621347	-1.64719	-1.07869	-0.672063	-1.60314	-0.960872	FALSE	no hit
ATP4A	495	0.478141	0.555973	0.674057	0.204392	1.81703	1.64948	0.665467	3.13614	-0.167711	-0.174263	-0.466917	0.138046	-0.732	-0.372871	-1.91109	0.0879618	FALSE	no hit
ATP6AP1	537	-0.959262	-0.590992	-2.10011	-0.186688	2.30819	1.51112	1.07603	4.33742	-1.10099	-0.485717	-1.12689	-1.69038	-0.834455	-0.296769	-1.35828	-0.848313	FALSE	no hit
ATP6V1C1	528	0.221222	0.343414	0.123232	0.197022	2.03291	1.00093	1.5678	3.53	-0.576058	-0.572598	-0.664895	-0.49068	-1.08001	-0.765363	-1.91409	-0.560569	FALSE	no hit
ATP8B1	5205	0.0492748	0.586908	-0.715691	0.276608	2.3025	1.7446	0.638398	4.5245	-0.508245	-0.555075	-0.837116	-0.132545	-0.953269	-0.82359	-1.60648	-0.429739	FALSE	no hit
AURKA	6790	-2.27745	-2.10748	-2.75505	-1.96983	-0.450431	-0.706918	-1.2204	0.576025	-1.97402	-1.28244	-1.64232	-2.99729	-0.87877	-0.642309	-1.78529	-0.208707	FALSE	no hit
AZU1	566	1.26707	1.3481	1.17141	1.2817	2.99758	1.45491	1.1031	6.43474	-0.0787048	-0.439797	-0.462068	0.665751	-1.30817	-0.990809	-2.18763	-0.746076	FALSE	no hit
B4GAT1	11041	-0.688359	-0.498361	-1.70744	0.140724	1.17384	0.624769	0.00676747	2.88997	-0.706222	-0.806789	-0.937524	-0.374353	-0.759155	-0.654368	-1.12056	-0.502537	FALSE	no hit
BAX	581	0.447131	0.0506254	0.31359	0.977177	3.15107	2.20723	1.54975	5.69625	-0.470314	-0.670349	-0.70209	-0.0385032	-1.3173	-0.783417	-2.25098	-0.917503	FALSE	no hit
BCL2L1	598	-2.47268	-2.3932	-2.94608	-2.07877	-0.0997989	-0.265905	-1.17077	1.13728	-2.3255	-1.15949	-1.67482	-4.14218	-0.736765	-0.433939	-0.944834	-0.831523	FALSE	no hit
BEND7	222389	-0.100648	0.197821	0.112213	-0.611978	1.94148	1.16523	0.223326	4.43588	-0.650469	-0.463408	-0.802778	-0.68522	-0.938835	-0.56389	-2.16426	-0.0883595	FALSE	no hit
BIRC8	112401	0.305562	-0.214913	2.05789	-0.926287	2.41771	1.51544	0.651933	5.08576	-1.12354	-0.618713	-0.803407	-1.94851	-1.57824	-0.578705	-3.64576	-0.510246	FALSE	no hit
BMP2K	55589	-1.34934	-1.66179	-1.97852	-0.40772	0.378291	0.339407	-0.489513	1.28498	-1.39995	-1.11449	-1.51779	-1.56756	-1.20727	-0.655484	-2.25278	-0.713556	FALSE	no hit
BOC	91653	-1.1588	-1.02201	-2.11216	-0.342234	1.3099	0.689624	0.182722	3.05736	-1.54355	-1.11605	-1.40086	-2.11375	-1.27567	-0.881268	-1.90119	-1.04456	FALSE	no hit
BPIFB6	128859	-1.2149	-1.2565	-0.691123	-1.69709	1.29916	0.525325	0.354164	3.01798	-1.27538	-0.892455	-1.09585	-1.83784	-0.885389	-0.463369	-2.34716	0.154364	FALSE	no hit
BRK1	55845	-1.27526	-0.980974	-2.44081	-0.403997	1.1636	0.849599	-0.160163	2.80135	-1.69233	-1.44553	-1.73521	-1.89623	-1.60489	-1.35666	-2.52048	-0.937518	FALSE	no hit
BTD	686	-1.27482	-1.46936	-1.83208	-0.523022	1.12424	0.482088	-0.196257	3.0869	-1.44361	-1.10971	-1.5653	-1.65582	-1.27101	-0.661144	-2.50666	-0.645238	FALSE	no hit
BUB1B	701	-1.28765	-0.641757	-2.42609	-0.795095	1.42016	1.37276	-0.00225582	2.88997	-1.31118	-0.747984	-1.61862	-1.56693	-1.06307	-0.587964	-2.22182	-0.379429	FALSE	no hit
C16orf89	146556	-1.23167	-0.212625	-3.02083	-0.461551	1.18908	0.335084	-0.701561	3.93371	-1.01007	-0.749727	-1.87269	-0.407804	-0.91619	-0.764014	-2.13077	0.146213	FALSE	no hit
C1QL1	10882	-0.334643	-1.06092	-0.703223	0.760215	2.23278	0.607474	-0.412815	6.50367	-0.317261	-0.969922	-0.938322	0.956461	-0.915321	-0.628195	-1.88737	-0.230395	FALSE	no hit
ATP10B	23120	0.203603	0.379123	-0.0843167	0.316003	1.46369	1.47653	0.78277	2.13178	-0.39398	-0.273053	-0.506151	-0.402736	-0.808036	-0.40196	-1.42545	-0.596696	FALSE	no hit
ATP1B1	481	-1.19798	-1.46039	-1.3694	-0.764146	0.271561	0.179432	0.187233	0.448019	-1.26273	-0.738795	-1.04952	-1.99986	-0.817357	-0.230236	-1.69111	-0.530726	FALSE	no hit
ATP4B	496	0.161522	0.578401	-0.357561	0.263724	1.47634	1.17387	0.611328	2.64381	-0.538746	-0.209918	-0.495225	-0.911097	-0.769116	-0.395998	-1.19003	-0.721325	FALSE	no hit
ATP6AP2	10159	-0.971471	-1.03711	-1.58858	-0.288721	2.19143	1.47221	0.981283	4.12079	-1.05809	-0.716514	-1.09668	-1.36107	-0.882886	-0.372118	-1.62367	-0.652873	FALSE	no hit
ATP6V1C2	245973	-0.776669	-0.352292	-1.7055	-0.27222	0.983114	0.620445	0.0789538	2.24994	-0.931663	-0.549551	-1.19861	-1.04683	-0.932884	-0.481667	-1.83562	-0.481366	FALSE	no hit
ATP8B2	57198	-1.17108	-0.900041	-1.69742	-0.915791	0.576912	0.24861	-0.0293257	1.51145	-1.80445	-0.955468	-1.06866	-3.38924	-1.17513	-0.741172	-1.49214	-1.29208	FALSE	no hit
AURKAIP1	54998	-1.53395	-1.19628	-3.00328	-0.402285	0.345971	0.335084	-0.769235	1.47206	-1.85919	-0.760126	-1.75439	-3.06306	-1.27451	-0.344436	-1.96627	-1.51281	FALSE	no hit
B2M	567	-1.15642	-1.62253	-1.81808	-0.0286582	1.99263	0.918777	0.642909	4.41619	-1.30112	-1.02757	-1.1153	-1.76048	-1.05328	-0.578971	-1.50789	-1.07299	FALSE	no hit
BAAT	570	-0.131204	0.0200423	-1.14159	0.727936	1.66112	0.63774	0.638398	3.70724	-0.905997	-0.484436	-1.41722	-0.81634	-1.38585	-0.32666	-2.73155	-1.09935	FALSE	no hit
BBOX1	8424	-1.26516	-1.44131	-1.7547	-0.599484	1.16907	0.823657	-0.462443	3.14598	-1.67367	-1.26103	-1.43839	-2.32158	-1.36609	-0.898241	-2.23416	-0.965882	FALSE	no hit
BCL2L10	10017	-1.17616	-0.506948	-2.70266	-0.318875	1.71835	0.789068	-0.17821	4.5442	-1.19589	-0.649896	-1.66799	-1.26978	-1.08913	-0.541362	-2.16358	-0.562464	FALSE	no hit
BEX5	340542	-2.34593	-2.93735	-2.92634	-1.17409	0.0696174	-0.170785	-1.11212	1.49176	-2.04187	-1.6253	-1.75546	-2.74485	-1.15999	-0.704279	-1.96835	-0.807348	FALSE	no hit
BIVM	54841	-1.86213	-1.7886	-2.60377	-1.19402	1.01982	0.477764	-0.101512	2.68319	-1.89482	-1.22723	-1.281	-3.17623	-0.906211	-0.70947	-1.0217	-0.987463	FALSE	no hit
BMP3	651	-0.583134	-1.46104	-0.421061	0.132695	1.8797	1.04849	0.489513	4.1011	-0.689105	-1.0341	-0.498054	-0.535156	-0.693127	-0.64228	-0.883295	-0.553808	FALSE	no hit
BOK	666	-1.44301	-1.4431	-2.02929	-0.856628	0.941291	0.443175	-0.272954	2.65365	-1.72276	-1.19422	-1.50751	-2.46655	-1.28507	-0.826038	-2.27005	-0.759134	FALSE	no hit
BPIFC	254240	-0.149144	0.521398	-1.09771	0.12888	1.43125	0.63774	0.48049	3.17552	-0.787762	-0.493225	-0.920917	-0.949144	-1.03992	-0.774121	-1.57148	-0.774173	FALSE	no hit
BROX	148362	-1.46066	-1.95479	-2.57327	0.146083	1.19667	0.702595	-0.376722	3.26414	-1.24527	-1.28524	-1.50133	-0.949238	-1.07726	-0.741871	-1.69646	-0.79344	FALSE	no hit
BTG2	7832	-1.4407	-2.79457	-1.03415	-0.493374	-0.00684499	-0.668005	-0.86398	1.51145	-1.62709	-1.31234	-0.891055	-2.67789	-0.988291	-0.295788	-1.43649	-1.23259	FALSE	no hit
BVES	11149	-1.79221	-2.9083	-2.13842	-0.329913	1.13358	0.490735	-0.462443	3.37245	-1.45943	-1.47074	-1.3986	-1.50895	-1.06955	-0.59677	-1.86262	-0.749256	FALSE	no hit
C17orf58	284018	-3.85611	-3.1828	-6.42442	-1.9611	-0.73904	-0.642063	-1.97384	0.398787	-1.92367	-1.00736	-2.44623	-2.31744	-0.0385141	0.307796	-0.608685	0.185347	FALSE	no hit
C1QL2	165257	-0.9655	-1.60523	-0.828434	-0.462832	1.89268	0.789068	0.187233	4.70174	-0.944109	-1.077	-1.06635	-0.68897	-0.915096	-0.521845	-2.07212	-0.151318	FALSE	no hit
ATP10D	57205	0.0532247	0.701989	-0.889062	0.346747	1.4569	0.949043	0.72863	2.69304	-0.568656	-0.17634	-0.644254	-0.885375	-0.814529	-0.39926	-1.14978	-0.894546	FALSE	no hit
ATP1B2	482	-0.185155	-0.120425	-0.962712	0.527672	2.02471	1.10902	0.7557	4.20941	-0.942238	-0.637256	-0.944597	-1.24486	-1.15487	-0.616133	-1.6926	-1.15588	FALSE	no hit
ATP5A1	498	0.659273	0.572758	0.891675	0.513388	1.76653	0.871217	1.13468	3.29368	-0.351605	-0.24917	-0.0194961	-0.78615	-0.798666	-0.446965	-1.03411	-0.91492	FALSE	no hit
ATP6V0A1	535	-0.176445	-0.311808	-0.205036	-0.0124911	1.75709	1.26035	0.421839	3.58908	-1.03188	-0.715361	-0.5865	-1.79378	-1.07739	-0.677221	-1.49473	-1.06022	FALSE	no hit
ATP6V1D	51382	0.72959	1.13047	0.112556	0.945739	2.53007	1.9651	1.23845	4.38665	-0.0279258	-0.137845	-0.52924	0.583308	-0.922711	-0.565896	-1.66665	-0.535585	FALSE	no hit
ATP8B3	148229	-0.0961882	-0.910161	0.555007	0.066589	1.04048	-0.0194565	1.21589	1.92501	-1.10451	-1.14212	0.249681	-2.42111	-0.883439	-0.942552	-0.282268	-1.4255	FALSE	no hit
AURKB	9212	-1.04006	-0.489778	-2.52586	-0.104551	0.710015	0.313465	-0.295513	2.11209	-1.44275	-0.563269	-1.40938	-2.35561	-1.09623	-0.369691	-1.55097	-1.36802	FALSE	no hit
B3GALNT1	8706	0.221878	0.138304	-0.436532	0.96386	2.26208	1.24305	0.733142	4.81005	-0.894253	-0.672741	-0.688507	-1.32151	-1.29648	-0.742578	-1.58216	-1.56471	FALSE	no hit
BACE1	23621	0.0450061	-0.887968	0.0421444	0.980842	2.52473	1.29494	2.00091	4.27834	-0.506026	-0.826951	-0.193147	-0.497981	-0.815258	-0.606155	-0.828475	-1.01114	FALSE	no hit
BBS2	583	-0.996856	-0.856494	-1.86574	-0.26834	1.93341	1.24738	0.579746	3.9731	-1.36705	-0.676497	-1.29828	-2.12639	-1.09497	-0.340056	-1.87555	-1.06929	FALSE	no hit
BCL2L13	23786	-0.69008	0.128556	-1.71165	-0.487148	1.49417	0.918777	0.358676	3.20506	-1.48799	-0.568871	-1.45155	-2.44355	-1.40472	-0.708726	-2.42229	-1.08313	FALSE	no hit
BGLAP	632	-0.965173	-1.58853	-1.56169	0.254699	1.49524	0.538296	0.0924887	3.85494	-1.05015	-1.33206	-0.911484	-0.906901	-0.901401	-0.959144	-0.928712	-0.816346	FALSE	no hit
BLK	640	-1.53552	-0.771631	-3.44634	-0.388588	2.05609	1.47221	0.466955	4.22911	-1.44742	-0.946628	-1.42895	-1.96667	-0.77755	-0.763707	-0.62137	-0.947573	FALSE	no hit
BMP4	652	-1.13408	-1.73631	-1.70624	0.0402967	0.783839	0.0799877	-0.155652	2.42718	-0.894026	-1.27038	-0.944125	-0.467572	-0.814305	-0.82414	-1.13884	-0.479938	FALSE	no hit
BOLA1	51027	-1.83171	-1.55305	-3.84369	-0.0983894	0.700561	0.399938	-0.439885	2.14163	-1.38718	-1.13779	-2.01816	-1.0056	-1.08508	-0.679299	-1.93847	-0.637471	FALSE	no hit
BPNT1	10380	-1.28503	-0.75423	-3.51671	0.415837	1.85277	1.49382	-0.381234	4.44573	-0.839533	-0.721695	-1.48501	-0.311895	-0.726227	-0.54902	-0.956854	-0.672806	FALSE	no hit
BRPF3	27154	-0.677199	0.080357	-2.45444	0.342487	1.93621	1.82675	0.146628	3.83524	-0.301808	-0.483067	-0.808102	0.385746	-0.337679	-0.527486	-0.240357	-0.245195	FALSE	no hit
BTK	695	-0.639002	-0.467509	-1.60031	0.150814	2.2582	1.20846	0.805328	4.76082	-0.92586	-0.72084	-1.10494	-0.9518	-1.02502	-0.669567	-1.72287	-0.682625	FALSE	no hit
C10orf99	387695	-1.02564	-2.07235	-1.27063	0.266074	1.95332	0.832304	0.17821	4.84944	-1.02563	-1.20925	-0.786106	-1.08152	-0.876861	-0.558805	-1.14789	-0.92389	FALSE	no hit
C17orf62	79415	-2.46503	-2.42478	-4.393	-0.57729	0.526739	0.10593	-1.23845	2.71273	-1.69918	-1.18173	-1.96907	-1.94673	-0.735484	-0.311025	-1.13366	-0.761771	FALSE	no hit
C1QL3	389941	-1.8289	-2.69146	-3.16055	0.365313	0.900388	-0.300494	-0.981283	3.98294	-0.928055	-1.43453	-1.34865	-0.000988816	-0.628576	-0.613374	-0.907664	-0.364688	FALSE	no hit
ATP11A	23250	-1.46079	-1.14447	-2.14234	-1.09555	-0.70808	-0.754478	-1.14821	-0.221548	-1.66634	-0.524258	-1.14845	-3.3263	-0.752222	-0.00842465	-1.18496	-1.06328	FALSE	no hit
ATP1B3	483	-0.753208	-2.0357	-0.51081	0.286884	1.1271	0.218345	0.164675	2.99828	-0.995784	-0.966461	-0.402786	-1.6181	-0.776378	-0.264904	-0.870641	-1.19359	FALSE	no hit
ATP5B	506	-0.228579	-0.800098	0.178579	-0.0642183	1.8092	1.25602	0.927143	3.24445	-0.939538	-0.867958	-0.165461	-1.78519	-0.832268	-0.605633	-0.902235	-0.988937	FALSE	no hit
ATP6V0A2	23545	-1.46655	-1.81998	-2.06912	-0.510533	0.897469	0.24861	0.00676747	2.43703	-1.64493	-1.314	-0.600371	-3.02043	-0.77324	-0.790651	-0.136668	-1.3924	FALSE	no hit
ATP6V1E1	529	-0.853906	-0.403403	-2.17282	0.0145038	1.59801	1.13928	0.548165	3.1066	-0.99697	-0.483999	-0.944206	-1.56271	-0.667639	-0.310285	-0.815137	-0.877494	FALSE	no hit
ATP8B4	79895	-0.0602019	-0.176671	-0.120096	0.116162	1.49587	1.19549	0.421839	2.87028	-1.09205	-0.627695	-0.569923	-2.07853	-1.14769	-0.64188	-1.57855	-1.22265	FALSE	no hit
AURKC	6795	-0.302307	-1.40916	-1.12251	1.62475	2.47218	1.24305	0.408304	5.76517	-0.819617	-1.06175	-1.00114	-0.395966	-1.34854	-0.674331	-1.85256	-1.51873	FALSE	no hit
B3GAT1	27087	-0.800641	-0.758508	-2.72496	1.08155	1.31225	0.659358	0.25942	3.01798	-1.12495	-0.825554	-1.20172	-1.34756	-1.07753	-0.632832	-1.03186	-1.56791	FALSE	no hit
BACE2	25825	-1.44392	-1.50301	-2.99496	0.166195	0.774624	0.412909	-0.358676	2.26964	-1.61158	-1.17983	-1.60616	-2.04875	-1.22756	-0.775461	-1.65177	-1.25544	FALSE	no hit
BCAM	4059	-0.781497	-0.314206	-2.22753	0.197248	2.71977	1.91754	1.11663	5.12515	-1.30859	-0.447145	-1.34272	-2.13592	-1.1784	-0.384704	-1.75689	-1.39362	FALSE	no hit
BCL2L14	79370	-0.715085	-0.627042	-1.47806	-0.0401515	1.54355	1.0874	0.25942	3.28383	-1.46435	-0.868049	-1.32998	-2.19503	-1.43159	-0.770344	-2.30092	-1.2235	FALSE	no hit
BGN	633	-0.112218	-0.562648	-0.88301	1.109	2.3174	1.33385	0.503048	5.1153	-0.796735	-0.960357	-1.18805	-0.241797	-1.46188	-0.909846	-2.38043	-1.09538	FALSE	no hit
BLM	641	-1.27855	-1.56659	-2.8044	0.535346	1.90671	1.31655	0.381234	4.02233	-1.03535	-1.00829	-1.68365	-0.414117	-1.14261	-0.585241	-2.06533	-0.777257	FALSE	no hit
BMP5	653	-0.34628	-2.07969	0.478104	0.562745	2.17399	1.17387	1.4144	3.93371	-0.399642	-1.17123	0.313143	-0.340843	-0.433331	-0.546842	-0.0251176	-0.728034	FALSE	no hit
BOLA3	388962	-1.95274	-1.82179	-3.68553	-0.350899	0.333947	-0.114577	-0.877515	1.99393	-1.68623	-1.46552	-1.88853	-1.70465	-1.17246	-0.997452	-1.73571	-0.784211	FALSE	no hit
BPTF	2186	-2.87323	-3.42583	-4.23546	-0.958414	0.314768	-0.0281038	-0.86398	1.83639	-1.90152	-1.92461	-1.16854	-2.61142	-0.333137	-0.980417	0.882899	-0.901892	FALSE	no hit
BRS3	680	-1.18003	-2.66269	-2.03985	1.16244	1.7343	0.91013	0.408304	3.88448	-0.840487	-1.44737	-1.0241	-0.0499903	-0.951444	-0.668395	-1.16662	-1.01931	FALSE	no hit
BTLA	151888	-1.88525	-1.97242	-3.36711	-0.316216	1.50886	0.680976	0.345141	3.50046	-1.5121	-1.07624	-1.63535	-1.82472	-0.973904	-0.494253	-1.53549	-0.891966	FALSE	no hit
C11orf52	91894	-1.72864	-2.83276	-3.08545	0.732297	1.78243	0.78042	0.318071	4.2488	-1.14491	-1.44991	-1.42369	-0.561136	-0.932487	-0.604752	-1.19679	-0.995915	FALSE	no hit
C17orf80	55028	-1.56454	-2.38915	-1.30555	-0.998931	0.908707	0.37832	-0.0203024	2.3681	-1.79951	-1.47598	-1.05445	-2.8681	-1.12539	-0.718631	-1.72979	-0.927743	FALSE	no hit
C1QL4	338761	-2.02496	-2.74418	-2.54886	-0.781837	0.416732	-0.0626931	-0.710584	2.02347	-1.85103	-1.71796	-1.54684	-2.28828	-1.19838	-0.976018	-1.84686	-0.772247	FALSE	no hit
ATP11B	23200	-0.176543	0.618886	-0.885664	-0.262852	0.34398	0.0626931	0.0879771	0.881269	-1.08879	-0.279726	-0.587439	-2.39919	-0.869556	-0.502587	-0.874958	-1.23112	FALSE	no hit
ATP23	91419	-1.05881	-0.893908	-1.53102	-0.751508	0.269641	-0.175108	0.0338373	0.950195	-1.30392	-0.873868	-0.725327	-2.31255	-0.714871	-0.581786	-0.777629	-0.785198	FALSE	no hit
ATP5C1	509	-0.434639	-0.720915	-0.407865	-0.175135	2.0244	1.37276	0.904585	3.79586	-1.03937	-0.779497	-0.386625	-1.95198	-0.848156	-0.586311	-0.920209	-1.03795	FALSE	no hit
ATP6V0A4	50617	-1.15305	-1.37452	-2.0719	-0.0127269	0.547794	-0.0108091	-0.566211	2.2204	-1.32775	-1.04601	-0.744071	-2.19316	-0.747891	-0.651638	-0.314456	-1.27758	FALSE	no hit
ATP6V1E2	90423	-0.810063	-1.18985	-1.14605	-0.0942817	1.39675	0.866894	0.187233	3.13614	-1.21317	-0.959531	-0.51131	-2.16866	-0.79298	-0.612795	-0.590281	-1.17586	FALSE	no hit
ATP9A	10079	-0.651937	-0.328765	-1.70531	0.0782583	1.22852	0.313465	0.462443	2.90966	-1.02765	-0.727619	-1.08338	-1.27196	-1.04061	-0.684773	-1.56525	-0.87179	FALSE	no hit
AVP	551	-1.31196	-2.15564	-1.81845	0.0382239	0.66611	0.304818	-0.349652	2.04317	-1.31527	-1.30735	-1.175	-1.46346	-1.08435	-0.690095	-1.64399	-0.918964	FALSE	no hit
B3GAT3	26229	-0.891461	-1.52006	-1.90508	0.750759	2.3183	1.3252	0.91812	4.71159	-0.626016	-0.986156	-0.837032	-0.0548617	-0.70996	-0.570533	-0.799964	-0.759382	FALSE	no hit
BAD	572	-1.68494	-2.38581	-2.4996	-0.169419	0.972563	0.706918	-0.0293257	2.2401	-1.67137	-1.20361	-1.15343	-2.65706	-1.00664	-0.462003	-1.15132	-1.4066	FALSE	no hit
BCAN	63827	-2.84983	-2.71722	-5.74805	-0.0842242	-0.824985	-1.01822	-1.16626	-0.290474	-1.83199	-1.38514	-2.30081	-1.81002	-0.873882	-0.499483	-1.092	-1.03017	FALSE	no hit
BCL2L15	440603	-0.664324	-0.712664	-1.73826	0.457957	2.33502	1.11767	0.791794	5.09561	-0.952201	-0.878513	-1.09448	-0.883609	-1.09687	-0.722864	-1.5876	-0.980155	FALSE	no hit
BHLHB9	80823	-1.14064	-0.688951	-2.57335	-0.159634	1.95827	1.2344	-0.00225582	4.64266	-1.71566	-0.833896	-1.89029	-2.42279	-1.56757	-0.645825	-2.7449	-1.31199	FALSE	no hit
BLMH	642	-1.88659	-2.33797	-3.5104	0.188606	1.37065	0.962014	-0.23235	3.3823	-1.2946	-1.27138	-1.6759	-0.936506	-0.893524	-0.49221	-1.4174	-0.770963	FALSE	no hit
BMP6	654	-1.76374	-2.57412	-2.85182	0.134721	1.03976	0.434528	-0.421839	3.1066	-1.40457	-1.25929	-1.41745	-1.53696	-0.995896	-0.454749	-1.42722	-1.10572	FALSE	no hit
BPGM	669	-2.26919	-2.53061	-4.25593	-0.0210223	0.619496	0.490735	-0.340629	1.70838	-1.84158	-1.50276	-1.91355	-2.10843	-1.13546	-0.773779	-1.34929	-1.28331	FALSE	no hit
BRAF	673	-2.35257	-2.43262	-4.91697	0.291897	0.635404	0.33076	-0.674491	2.24994	-1.37726	-1.41661	-1.98216	-0.73302	-0.821792	-0.749228	-0.976081	-0.740066	FALSE	no hit
BRSK1	84446	-1.2098	-1.42464	-2.38706	0.182293	1.5299	1.416	-0.0609072	3.2346	-1.34898	-1.08307	-1.3551	-1.60878	-1.1359	-0.722237	-1.56112	-1.12435	FALSE	no hit
BTN1A1	696	-2.35208	-3.44798	-3.53422	-0.0740433	1.09241	0.469117	0.00676747	2.80135	-1.65498	-1.871	-1.30147	-1.79247	-0.770193	-0.917069	-0.375903	-1.01761	FALSE	no hit
C11orf54	28970	-2.20069	-1.88723	-3.969	-0.745839	0.927057	0.728536	-0.778259	2.83089	-1.85603	-1.3638	-1.43179	-2.77252	-0.79945	-0.89373	-0.422807	-1.08181	FALSE	no hit
C17orf99	100141515	-1.92801	-2.42589	-2.6549	-0.703239	0.981791	0.0497221	-0.466955	3.36261	-1.59293	-1.49006	-1.36894	-1.91979	-0.964709	-0.838087	-1.36334	-0.692697	FALSE	no hit
C1QTNF1	114897	-2.0435	-2.29941	-2.89396	-0.937113	0.585079	0.144843	-0.895561	2.50595	-1.65518	-1.3115	-1.34057	-2.31348	-0.798786	-0.637093	-1.0609	-0.698367	FALSE	no hit
ATP11C	286410	-0.824207	-0.535865	-0.92239	-1.01437	0.519562	0.361026	0.444397	0.753263	-1.16002	-0.152999	-0.111019	-3.21603	-0.218806	0.138165	0.252851	-1.04743	FALSE	no hit
ATP2A1	487	-0.450178	-0.144084	-1.1451	-0.0613468	0.620742	0.438851	0.236861	1.18651	-0.724223	-0.250748	-0.651286	-1.27064	-0.580314	-0.142265	-0.897933	-0.700745	FALSE	no hit
ATP5D	513	-0.900695	-1.06554	-1.36808	-0.268465	0.749214	0.594503	0.200768	1.45237	-1.07582	-0.458642	-0.592388	-2.17643	-0.500402	0.214832	-0.601956	-1.11408	FALSE	no hit
ATP6V0B	533	-1.12444	-0.405464	-3.44506	0.477213	1.43149	0.754478	0.187233	3.35276	-0.796085	-0.472942	-1.23149	-0.683822	-0.54415	-0.312086	-0.421845	-0.898518	FALSE	no hit
ATP6V1F	9296	-2.31245	-2.51049	-2.52285	-1.90401	0.282213	0.214021	-0.593281	1.2259	-2.14885	-1.23124	-0.909153	-4.30616	-0.603917	-0.406255	-0.388042	-1.01745	FALSE	no hit
ATP9B	374868	-1.60828	-1.43055	-3.63412	0.239837	0.666698	0.179432	-0.23235	2.05301	-1.15092	-0.638882	-1.63317	-1.1807	-0.737529	-0.109123	-1.29702	-0.806443	FALSE	no hit
AVPR1A	552	-1.19991	-0.740692	-3.13672	0.277678	0.770157	0.296171	-0.196257	2.21056	-1.29099	-0.929273	-1.1298	-1.81389	-0.791354	-0.719446	-0.377177	-1.27744	FALSE	no hit
B3GNT2	10678	-1.46496	-0.977028	-4.07059	0.652734	1.82267	0.767449	0.471467	4.22911	-0.747971	-0.542213	-1.46792	-0.233776	-0.490505	-0.246026	-0.426657	-0.79883	FALSE	no hit
BAG1	573	-1.156	-1.53395	-1.50296	-0.431095	1.6723	0.503706	0.0970003	4.41619	-1.43586	-0.995032	-1.14249	-2.17005	-1.10111	-0.534775	-1.78936	-0.979191	FALSE	no hit
BCAR1	9564	-2.37853	-3.60668	-2.98031	-0.548602	0.39567	0.252934	-0.281978	1.21605	-1.18921	-1.18345	-0.886888	-1.49731	-0.0492218	0.187716	0.121002	-0.456383	FALSE	no hit
BCL2L2	599	-2.08816	-2.77968	-3.25941	-0.225389	0.934425	0.361026	-0.300024	2.74227	-1.3401	-1.27703	-1.1545	-1.58876	-0.439724	-0.145995	-0.409536	-0.763642	FALSE	no hit
BHMT	635	-1.89975	-1.96553	-2.55768	-1.17604	1.24489	0.572885	0.0157908	3.14598	-1.85718	-0.988884	-1.66404	-2.91861	-1.14152	-0.321173	-2.27831	-0.82508	FALSE	no hit
BLNK	29760	-2.23521	-3.14106	-2.66781	-0.896765	0.771473	0.443175	-0.624863	2.49611	-1.52078	-1.52932	-0.87686	-2.15616	-0.441566	-0.554791	-0.0911261	-0.678779	FALSE	no hit
BMP7	655	-2.03458	-2.42428	-3.06221	-0.617249	0.94444	0.322113	-0.408304	2.91951	-1.96069	-1.14611	-1.57347	-3.1625	-1.06879	-0.309807	-1.5278	-1.36877	FALSE	no hit
BPHL	670	-2.16355	-2.43057	-3.83061	-0.229463	0.798623	0.728536	-0.602304	2.26964	-1.67443	-1.34845	-1.30794	-2.36688	-0.720113	-0.688912	-0.224067	-1.24736	FALSE	no hit
BRCA1	672	-2.54335	-3.04142	-4.75	0.161368	0.600943	-0.118901	-0.692537	2.61427	-1.25677	-1.41434	-1.55038	-0.805587	-0.368131	-0.473054	0.0841761	-0.715516	FALSE	no hit
BRSK2	9024	-2.1445	-1.64721	-4.37162	-0.41467	1.05205	0.0799877	-0.394769	3.47092	-1.63191	-1.0788	-1.66252	-2.1544	-0.698692	-0.587037	-0.612605	-0.896435	FALSE	no hit
BTN2A1	11120	-4.66544	-3.80818	-7.26545	-2.9227	-1.69326	-1.45923	-2.43403	-1.18651	-3.20874	-1.6622	-2.58064	-5.38336	-0.472302	-0.361432	-0.227189	-0.828286	FALSE	<-3 in 2 replicates | <-2 in all replicates
C11orf94	143678	-2.7264	-1.832	-4.92247	-1.42473	0.52553	0.533972	-1.03993	2.08255	-2.18131	-1.09415	-1.87559	-3.57419	-0.663654	-0.528485	-0.483227	-0.97925	FALSE	no hit
C18orf54	162681	-1.47463	-1.84313	-2.76582	0.18505	1.64453	0.95769	-0.489513	4.46542	-1.17808	-1.15185	-1.27786	-1.10454	-0.840852	-0.622574	-1.05641	-0.843574	FALSE	no hit
C1QTNF12	388581	-2.78977	-2.13017	-4.30854	-1.9306	-0.256991	-0.633416	-1.64901	1.51145	-2.15956	-0.966136	-1.99615	-3.5164	-0.643171	-0.189362	-1.20955	-0.530599	FALSE	no hit
ATP12A	479	-1.25955	-0.760585	-2.0849	-0.933149	0.102356	-0.209697	-0.0789538	0.595718	-1.41864	-0.700995	-0.857554	-2.69738	-0.639038	-0.398054	-0.632483	-0.886578	FALSE	no hit
ATP2A2	488	-1.80523	-0.443429	-3.79741	-1.17485	-0.0486609	-0.0799877	-0.868491	0.802496	-1.26161	-0.340979	-1.14165	-2.3022	-0.123504	-0.162329	0.261576	-0.469759	FALSE	no hit
ATP5E	514	-1.5905	-1.28037	-2.60022	-0.890899	0.888959	0.585856	0.313559	1.76746	-1.02591	-0.605314	-0.986225	-1.48619	-0.19605	-0.113251	-0.304	-0.1709	FALSE	no hit
ATP6V0C	527	-2.49136	-1.97271	-3.85425	-1.64711	0.674879	0.391291	0.525607	1.10774	-1.97959	-1.06069	-1.33771	-3.54037	-0.502097	-0.414121	-0.248253	-0.843916	FALSE	no hit
ATP6V1G1	9550	-2.44526	-1.30653	-4.4271	-1.60214	0.163791	0.0367511	-0.800817	1.25544	-1.96011	-0.922457	-1.73309	-3.22477	-0.56332	-0.545939	-0.497601	-0.646418	FALSE	no hit
ATPIF1	93974	-2.25345	-2.66619	-3.85775	-0.236426	0.175274	-0.317789	-0.963236	1.80685	-1.53714	-1.05744	-1.80568	-1.7483	-0.724866	-0.0309125	-1.34303	-0.800657	FALSE	no hit
AVPR1B	553	-2.93298	-2.61726	-4.38384	-1.79783	-1.27476	-0.91013	-2.08212	-0.832036	-2.90288	-1.64657	-1.86748	-5.1946	-1.13283	-0.894066	-0.971185	-1.53323	FALSE	no hit
B3GNT8	374907	-1.10547	-1.10579	-2.46855	0.257931	1.71353	0.2832	0.155652	4.70174	-0.760127	-0.658372	-1.08148	-0.54053	-0.593499	-0.261443	-0.876156	-0.642896	FALSE	no hit
BAG6	7917	-1.10617	-1.18672	-3.27197	1.14018	4.24483	1.09605	0.0834654	11.555	0.586799	-0.720882	-1.30863	3.7899	-0.0252036	-0.342326	-0.770899	1.03761	FALSE	no hit
BCAS1	8537	-1.14865	-1.63039	-1.61326	-0.202301	1.17193	0.175108	-0.110535	3.45123	-1.38884	-1.02116	-0.862716	-2.28265	-0.966494	-0.528711	-1.13751	-1.23326	FALSE	no hit
BCL2L2-PABPN1	100529063	-1.89912	-2.73024	-3.22336	0.256228	1.16504	0.348055	-0.146628	3.29368	-1.17259	-1.22978	-1.22924	-1.05875	-0.533233	-0.319612	-0.392908	-0.887181	FALSE	no hit
BHMT2	23743	-1.65668	-0.316017	-3.85691	-0.797109	1.01119	0.15349	-0.512072	3.39215	-1.72713	-0.769982	-1.82478	-2.58663	-1.05359	-0.735632	-1.52204	-0.903091	FALSE	no hit
BLOC1S1	2647	-2.66971	-2.12719	-5.19806	-0.68389	0.336941	-0.222668	-1.35124	2.58473	-1.5624	-0.846573	-1.52118	-2.31945	-0.0939521	-0.0374184	0.640312	-0.88475	FALSE	no hit
BMP8A	353500	-1.63129	-1.54528	-3.09382	-0.254769	1.63974	0.373996	-0.038349	4.58358	-1.31352	-0.973334	-1.29915	-1.66807	-0.747439	-0.561293	-0.921876	-0.759149	FALSE	no hit
BPI	671	-2.53573	-1.63898	-4.96557	-1.00263	-0.225754	-0.313465	-1.05798	0.694184	-2.27469	-1.30062	-1.57806	-3.9454	-0.7122	-0.873814	0.190048	-1.45283	FALSE	no hit
BRCC3	79184	-2.65695	-2.93397	-4.70556	-0.331303	0.595286	0.231316	-0.715096	2.26964	-1.54346	-1.25663	-1.54338	-1.83037	-0.343292	-0.272557	0.0404394	-0.797758	FALSE	no hit
BSG	682	-3.21482	-3.36276	-4.8804	-1.4013	-0.594982	-0.784744	-2.17687	1.17667	-2.00023	-1.46017	-1.65511	-2.8854	-0.401108	-0.316772	-0.267328	-0.619224	FALSE	no hit
BTN2A2	10385	-3.53266	-3.03966	-6.32028	-1.23805	-0.282361	-0.546943	-1.27003	0.969888	-2.05206	-1.4087	-2.09096	-2.65652	-0.320267	-0.448846	0.125557	-0.637511	FALSE	no hit
C12orf10	60314	-2.46246	-1.57377	-4.60658	-1.20703	-0.0479136	-0.33076	-1.80691	1.99393	-1.82974	-1.03398	-1.97813	-2.47711	-0.773468	-0.579264	-1.14528	-0.595864	FALSE	no hit
C19orf18	147685	-1.74489	-2.4288	-1.92882	-0.877038	0.965676	0.226992	-0.584258	3.25429	-1.20535	-1.3485	-0.813383	-1.45417	-0.491388	-0.610436	-0.615636	-0.248091	FALSE	no hit
C1QTNF2	114898	-4.37665	-4.46762	-5.89481	-2.76754	-1.09722	-1.49382	-1.96031	0.162469	-2.68573	-1.53962	-2.41738	-4.10019	-0.389255	0.168968	-1.15719	-0.179547	FALSE	<-3 in 2 replicates | <-2 in all replicates
C1QTNF3	114899	-0.454172	-0.869971	0.101133	-0.593677	-0.968416	-0.786906	-1.6746	-0.443744	0.471271	0.0333101	1.11444	0.26606	0.812177	0.870737	0.549937	1.01586	FALSE	no hit
C2	717	0.150974	-0.566049	0.426552	0.592419	0.415628	-0.100262	0.441908	0.905238	-0.185667	-0.238507	0.303794	-0.622288	-0.195716	0.400322	-0.247355	-0.740116	FALSE	no hit
C5AR2	27202	0.975051	-0.469019	1.55917	1.835	-0.00846408	-0.464852	0.581458	-0.141998	-0.0716902	-0.408548	0.932976	-0.739498	-0.73816	0.103657	-0.419421	-1.89872	FALSE	no hit
C9orf3	84909	-0.86199	-1.45414	0.0259375	-1.15776	-0.121577	-0.555999	1.06988	-0.878613	-1.32515	-0.883666	-0.833611	-2.25818	-0.436195	0.254334	-0.748521	-0.814397	FALSE	no hit
CA7	766	-0.404895	-1.50197	1.29946	-1.01217	-1.58993	-0.969201	-3.41897	-0.38162	-0.405059	-1.41929	0.120437	0.0836734	0.0953963	-0.201278	-0.909378	1.39684	TRUE	no hit
CACNA1H	8912	-1.78479	-2.20601	-2.34346	-0.804912	-2.83219	-1.86245	-4.6284	-2.00572	-1.75777	-1.30688	-2.00773	-1.95871	-0.120913	0.36972	0.0120648	-0.744524	FALSE	no hit
CACNG4	27092	-0.638963	-0.994621	-1.83689	0.914622	-2.56244	-1.668	-4.09346	-1.92585	-1.23231	-0.863112	-2.02819	-0.80562	-0.515593	0.0505822	-0.492914	-1.10445	FALSE	no hit
CALB2	794	0.0727141	-0.732761	-0.495878	1.44678	-0.329294	-0.756523	-0.302358	0.070999	-1.07691	-0.919148	-1.82049	-0.491111	-0.935436	-0.256647	-1.14684	-1.40282	FALSE	no hit
CALY	50632	-0.108298	-1.50756	-0.229008	1.41167	-0.744918	-1.16365	-1.00011	-0.070999	-1.25844	-1.2045	-1.74517	-0.825645	-0.91448	-0.0766947	-1.26267	-1.40408	FALSE	no hit
CAND1	55832	-0.678562	-0.932543	-1.23858	0.13544	-1.55803	-1.21226	-2.32583	-1.13598	-1.96748	-1.04789	-2.4269	-2.42766	-1.11559	-0.270308	-1.16762	-1.90883	FALSE	no hit
CAPN5	726	0.48601	-0.173838	0.253748	1.37812	0.444491	-0.51954	1.79089	0.0621241	-0.979162	-1.04981	-0.80904	-1.07864	-1.085	-0.745767	-0.83183	-1.6774	FALSE	no hit
CARD8	22900	-0.0968961	-0.781805	-0.670035	1.16115	-0.939261	-1.20011	-1.20943	-0.408244	-1.43812	-1.30542	-2.3374	-0.671556	-1.1236	-0.597198	-1.50006	-1.27355	FALSE	no hit
CASP5	838	-0.130377	0.0398596	-0.894096	0.463105	-0.791045	-0.312939	-1.9537	-0.106499	-1.27118	-0.536318	-2.51296	-0.764271	-0.817354	-0.277468	-1.39339	-0.781205	FALSE	no hit
CAV1	857	0.0696288	-0.927924	0.905266	0.231545	0.884901	0.0151912	2.48864	0.150873	-1.01426	-1.10737	-1.39096	-0.544457	-0.785061	-0.33428	-1.71308	-0.307819	FALSE	no hit
CCDC107	203260	-2.10934	-1.63603	-1.65136	-3.04062	-1.91266	-1.69838	-2.44212	-1.59748	-3.23361	-1.96565	-3.98471	-3.75048	-1.09567	-0.797271	-1.87639	-0.61334	FALSE	no hit
CCL11	6356	-1.10721	-1.50133	-0.75278	-1.06753	-0.847729	-1.21226	-0.860557	-0.470369	-2.74342	-1.69941	-4.05734	-2.47351	-1.45723	-0.577264	-2.68265	-1.11178	FALSE	no hit
CCL25	6370	-0.403791	-0.606912	-0.607875	0.00341379	0.878188	-0.246098	2.2328	0.647866	-1.6219	-1.06451	-3.58784	-0.213342	-0.930059	-0.454136	-2.35841	0.0223681	FALSE	no hit
CCNB3	85417	-0.137036	-0.347406	-0.234445	0.170742	-0.00403537	-0.39801	0.0930332	0.292871	-1.02519	-1.06809	-3.75566	1.74817	-0.565933	-0.602204	-2.68769	1.59209	FALSE	no hit
CCR5	1234	0.110558	-1.05871	1.33749	0.0528977	-0.0880209	-0.300786	-0.0697749	0.106499	-0.309917	-1.6353	-2.03547	2.74102	-0.153654	-0.81867	-2.28161	2.63932	FALSE	no hit
CD101	9398	0.286427	-0.559469	-0.695182	2.11393	1.23823	-0.391934	3.512	0.594617	-0.00755493	-1.35709	-2.17549	3.50991	-0.182022	-0.750425	-1.37207	1.57642	FALSE	no hit
CD1C	911	-0.845511	-0.888635	-1.56916	-0.0787429	-0.685716	-0.841594	-0.860557	-0.354995	-0.746633	-1.10004	-3.21387	2.07401	0.15205	-0.248743	-1.46658	2.17148	TRUE	no hit
C1QTNF4	114900	-0.396814	-0.751738	0.588967	-1.02767	0.180908	-0.355475	0.907074	-0.00887488	0.0576092	0.0160939	1.08204	-0.925307	0.414317	0.724658	0.157176	0.361117	FALSE	no hit
C2orf16	84226	1.34585	0.379865	2.85557	0.802118	0.17434	-0.549923	1.23269	-0.159748	0.372712	-0.114961	1.63278	-0.399685	-0.552668	-0.0850305	-0.779582	-0.79339	FALSE	no hit
C5orf46	389336	0.354345	-1.02301	0.857343	1.2287	1.01943	-0.355475	3.20965	0.204122	0.218738	-0.719921	0.388454	0.987681	-0.035484	0.14942	-0.497835	0.241963	FALSE	no hit
C9orf72	203228	-3.02959	-2.52925	-2.42502	-4.13451	-2.95592	-2.07512	-4.69818	-2.09447	-2.7322	-1.62598	-2.78472	-3.7859	-0.0424011	0.177794	-0.710062	0.405065	FALSE	no hit
CA8	767	1.00032	0.0395261	1.21429	1.74715	0.37999	0.209639	0.255841	0.674491	-0.631411	-0.441494	-1.04064	-0.412098	-1.04175	-0.245301	-1.62296	-1.25699	FALSE	no hit
CACNA1I	8911	0.12221	-0.256941	0.346621	0.276951	0.221243	-0.246098	0.581458	0.328371	-1.43602	-0.749679	-1.61884	-1.93955	-1.20669	-0.363191	-1.48441	-1.77246	FALSE	no hit
CACNG5	27091	-0.850864	-1.3483	-0.598292	-0.606002	0.375734	-0.434469	1.53505	0.0266246	-2.45412	-1.63637	-3.08328	-2.64271	-1.45338	-0.632167	-2.021	-1.70698	FALSE	no hit
CALCA	796	0.523978	-0.493031	-0.0350345	2.1	-0.473366	-1.20618	-0.116292	-0.0976237	-0.987836	-1.33311	-0.759474	-0.870922	-1.25506	-0.848127	-0.725568	-2.19148	FALSE	no hit
CAMK1	8536	0.531463	-0.756488	-0.485391	2.83627	0.226741	-0.410163	1.41876	-0.328371	-1.37366	-1.48392	-2.58348	-0.0535873	-1.5332	-0.818118	-1.74369	-2.0378	FALSE	no hit
CANT1	124583	-2.05388	-1.90109	-2.19844	-2.06211	-1.62545	-1.29733	-2.55841	-1.02061	-2.64938	-1.72391	-2.87247	-3.35176	-0.768827	-0.442592	-0.847208	-1.01668	FALSE	no hit
CAPN6	827	1.31482	-0.720515	1.90608	2.75889	0.530566	-0.215716	1.18617	0.621241	-0.539672	-1.17392	-1.27776	0.83267	-1.24391	-0.502787	-2.12782	-1.10112	FALSE	no hit
CARHSP1	23589	-0.0759316	-0.574662	-1.15138	1.49825	-0.976946	-0.549923	-1.88392	-0.496993	-1.56468	-1.23126	-3.32464	-0.138128	-1.15212	-0.637867	-1.80075	-1.01775	FALSE	no hit
CASP6	839	0.302028	-0.498237	0.318459	1.08586	-0.541308	-0.404087	-0.2791	-0.940737	-1.38003	-1.15222	-2.4102	-0.577677	-1.23104	-0.634321	-1.98953	-1.06927	FALSE	no hit
CAV2	858	-1.44407	-1.75033	-1.06668	-1.5152	-0.550055	-0.246098	-0.907074	-0.496993	-2.487	-1.57437	-3.61016	-2.27646	-1.02248	-0.359455	-2.03076	-0.677236	FALSE	no hit
CCDC112	153733	-0.740002	-1.18968	-0.215481	-0.81485	-0.141461	-0.221792	-0.255841	0.0532493	-2.57778	-1.77615	-3.42332	-2.53387	-1.55563	-0.880742	-2.28169	-1.50444	FALSE	no hit
CCL13	6357	-0.441866	-1.38675	-0.063994	0.12515	-1.61769	-0.878053	-3.25616	-0.718865	-2.32037	-1.73464	-3.57259	-1.65389	-1.53974	-0.684489	-2.62449	-1.31023	FALSE	no hit
CCL26	10344	0.192717	-0.973948	1.29183	0.260271	0.993985	-0.29471	2.25606	1.02061	-0.609501	-1.49938	-2.33638	2.00727	-0.480916	-0.682206	-2.43244	1.6719	FALSE	no hit
CCND1	595	-0.838221	-1.08091	-1.3647	-0.0690527	-0.982175	-0.665376	-1.83741	-0.443744	-0.205958	-1.40698	-1.62471	2.41382	0.357272	-0.559007	-0.678754	2.30958	TRUE	no hit
CCR6	1235	0.316061	-0.296338	0.178862	1.06566	0.531426	-0.19141	1.58156	0.204122	-0.734225	-1.4443	-2.65475	1.89638	-0.73053	-1.03017	-2.14508	0.983662	FALSE	no hit
CD109	135228	0.213776	-1.37062	-0.320756	2.33271	0.0285729	-0.805135	1.32572	-0.434869	-0.815514	-1.55853	-3.14706	2.25904	-0.799281	-0.531409	-2.22216	0.355729	FALSE	no hit
CD1D	912	-0.70003	-0.468357	-1.26775	-0.363989	-0.718033	-0.428393	-0.95359	-0.772114	-1.08592	-1.48656	-3.58397	1.81278	-0.23948	-0.961633	-1.95565	2.19884	FALSE	no hit
C1QTNF5	114902	-1.99871	-1.44291	-4.04992	-0.503308	-2.39482	-1.67407	-3.93065	-1.57973	-0.304965	-0.461025	-0.552645	0.0987736	1.10446	0.762854	1.95465	0.595863	TRUE	no hit
C2orf40	84417	-0.306589	-0.370975	-1.76116	1.21237	-0.249969	-0.319016	0.2791	-0.70999	-0.847643	-0.289154	-1.48997	-0.763805	-0.546076	0.19023	-0.352206	-1.47625	FALSE	no hit
C6	729	-0.813376	-0.546789	-0.579997	-1.31334	-0.731607	-0.7626	-0.651232	-0.780989	-1.30473	-0.591324	-1.17991	-2.14295	-0.418988	-0.0349076	-0.660669	-0.561386	FALSE	no hit
CA1	759	0.298952	-0.947622	0.563768	1.28071	1.52101	-0.100262	4.32604	0.337245	-0.936571	-0.890936	-0.915988	-1.00279	-0.986776	-0.125018	-1.13868	-1.69663	FALSE	no hit
CA9	768	0.439941	-0.228646	1.25047	0.297999	0.88573	0.0941856	1.79089	0.772114	-1.44605	-0.855268	-1.33939	-2.14349	-1.45416	-0.524998	-1.93196	-1.90551	FALSE	no hit
CACNA1S	779	0.410473	-0.513409	-0.119323	1.86415	0.305063	-0.106339	0.790782	0.230747	-1.17002	-0.592465	-2.32922	-0.588382	-1.14419	0.0125476	-1.76831	-1.67681	FALSE	no hit
CACNG6	59285	0.112251	-0.753001	-0.0801524	1.16991	-0.403771	-0.331169	-0.418649	-0.461494	-1.63842	-0.836152	-2.28993	-1.78917	-1.45374	-0.183467	-1.80236	-2.37539	FALSE	no hit
CALCB	797	0.861701	-0.318729	0.748727	2.15511	0.485739	-0.154951	1.18617	0.425994	-1.32706	-1.05493	-1.37489	-1.55137	-1.73043	-0.654487	-1.70687	-2.82993	FALSE	no hit
CAMK1D	57118	-0.139338	-0.883082	-1.02059	1.48566	-0.154691	-0.319016	0.511683	-0.656741	-2.37212	-1.23599	-2.40299	-3.47738	-1.94968	-0.489906	-1.32604	-4.0331	FALSE	no hit
CANX	821	-0.161327	-1.08458	0.199095	0.401504	0.722144	-0.343322	1.79089	0.718865	-1.71958	-1.24707	-1.80781	-2.10385	-1.29299	-0.374365	-1.51037	-1.99424	FALSE	no hit
CAPN7	23473	-0.196679	-1.4392	-0.929855	1.77902	-0.10788	-0.483081	0.860557	-0.701115	-2.11608	-1.65942	-3.16455	-1.52427	-1.66843	-0.652197	-1.86038	-2.4927	FALSE	no hit
CARM1	10498	1.30009	-0.132392	0.936822	3.09583	1.24337	0.306863	2.16302	1.26023	-1.34979	-1.00921	-2.53968	-0.500468	-1.94035	-0.762917	-2.48755	-2.57058	FALSE	no hit
CASP7	840	-0.180947	-1.78051	-0.0638557	1.30153	0.406404	-0.124568	1.13966	0.204122	-1.98204	-2.03925	-2.7702	-1.13665	-1.62227	-0.863977	-2.14172	-1.86112	FALSE	no hit
CAV3	859	0.356745	-0.796571	0.396439	1.47037	0.451935	0.282557	1.72111	-0.647866	-1.54987	-1.47335	-2.5647	-0.611566	-1.48356	-0.840938	-2.21692	-1.39282	FALSE	no hit
CCDC126	90693	0.483212	-0.882982	1.07764	1.25498	0.718016	-0.154951	1.76763	0.541368	-1.81999	-1.53936	-2.77207	-1.14855	-1.79702	-0.839946	-2.78419	-1.76694	FALSE	no hit
CCL14	6358	-0.722448	-0.97623	-0.000594198	-1.19052	-1.71576	-1.49786	-2.25606	-1.39336	-2.7539	-1.95807	-3.83183	-2.47181	-1.70887	-1.11143	-2.91299	-1.1022	FALSE	no hit
CCL27	10850	-2.58563	-1.8244	-4.18103	-1.75145	-2.82746	-1.62546	-4.74469	-2.11222	-1.66993	-1.81088	-2.9898	-0.209125	0.398483	-0.505126	0.34441	1.35617	TRUE	no hit
CCND2	894	-0.456104	-1.07877	0.113574	-0.403112	0.684147	-0.0698797	1.9537	0.168623	-0.709762	-1.54964	-1.13235	0.552706	-0.269148	-0.688775	-1.05503	0.936363	FALSE	no hit
CCR7	1236	0.585703	-0.942707	1.99126	0.708554	1.75123	0.622841	3.81436	0.816489	-0.603747	-1.5598	-1.57	1.31856	-0.818934	-0.800765	-2.40855	0.752516	FALSE	no hit
CD14	929	0.790106	-0.848489	0.507911	2.7109	0.578667	-0.701835	2.34909	0.0887488	-0.275683	-1.59978	-2.58268	3.35541	-0.78891	-0.916365	-2.35432	0.903952	FALSE	no hit
CD1E	913	-0.84607	-1.38607	-1.43692	0.284774	-0.388687	-1.04212	0.488424	-0.612367	-0.775857	-1.5995	-1.13672	0.408654	-0.133834	-0.507231	-0.188438	0.294166	FALSE	no hit
C1QTNF6	114904	-4.60642	-2.3035	-5.42913	-6.08664	-4.42775	-2.86507	-7.30311	-3.11508	-2.60869	-1.49283	-2.82399	-3.50926	1.41615	0.221107	1.2953	2.73203	TRUE	toxic
C2orf69	205327	-0.219839	-0.523156	-0.105701	-0.0306586	-0.128527	-0.592458	0.348875	-0.141998	-0.41677	-0.633024	1.18089	-1.79817	-0.2936	-0.126052	0.554119	-1.30887	FALSE	no hit
C6orf120	387263	0.319982	-0.115684	0.29482	0.78081	0.253037	-0.0212677	0.372133	0.408244	-0.383208	-0.475452	-0.646	-0.0281728	-0.516639	-0.197926	-0.927927	-0.424064	FALSE	no hit
CA10	56934	0.330116	-0.513214	1.18034	0.323222	0.57402	-0.0881092	1.53505	0.275121	-0.807173	-0.886907	-0.234513	-1.3001	-0.865352	-0.347723	-1.09307	-1.15526	FALSE	no hit
CAB39	51719	1.83508	0.871287	2.0416	2.59236	1.5974	0.622841	3.13987	1.02949	-0.896698	-0.313353	-1.76917	-0.607575	-1.82396	-0.520756	-2.57663	-2.3745	FALSE	no hit
CACNA2D1	781	1.42306	0.118575	1.99256	2.15805	1.88839	0.768676	4.18649	0.70999	-0.247552	-0.709875	0.266481	-0.299263	-1.14983	-0.565384	-1.11058	-1.77354	FALSE	no hit
CACNG7	59284	-0.739618	-2.05808	-1.10662	0.945841	-0.147385	-0.555999	0.930332	-0.816489	-2.09853	-1.61283	-2.67481	-2.00795	-1.38768	-0.186426	-1.54489	-2.43172	FALSE	no hit
CALCR	799	1.25868	-0.859319	1.82099	2.81435	0.620685	-0.19141	1.32572	0.72774	-0.643532	-1.16922	-0.48187	-0.279502	-1.43476	-0.513081	-1.50127	-2.28992	FALSE	no hit
CAMK1G	57172	0.00627744	-1.63497	-0.369792	2.02359	0.182292	-0.337245	0.697749	0.186372	-1.92137	-1.7026	-2.74206	-1.31946	-1.63696	-0.565292	-1.83313	-2.51246	FALSE	no hit
CAP1	10487	0.487348	-0.875367	0.681233	1.65618	-1.58357	-1.40671	-1.79089	-1.5531	-1.35837	-1.16401	-1.24548	-1.66562	-1.43329	-0.368922	-1.42574	-2.5052	FALSE	no hit
CAPN8	388743	1.54224	-0.0751614	1.39872	3.30317	1.30264	0.221792	2.86077	0.825364	-0.661163	-0.501802	-1.36243	-0.119254	-1.59249	-0.318519	-1.94402	-2.51492	FALSE	no hit
CARMIL1	55604	1.17858	-1.30866	1.64538	3.19903	2.38194	0.88413	5.11683	1.14486	-0.780197	-1.30749	-1.25982	0.226717	-1.48181	-0.354734	-1.99204	-2.09867	FALSE	no hit
CASP8	841	0.12506	-0.4889	0.108262	0.755819	2.02801	0.653223	3.74459	1.68623	-1.73958	-1.03102	-3.01055	-1.17717	-1.52151	-0.533516	-2.45811	-1.57289	FALSE	no hit
CBLC	23624	0.201379	-1.32558	0.980669	0.949049	1.34163	0.720064	2.6747	0.630116	-1.3447	-1.51635	-1.73411	-0.783626	-1.24603	-0.559785	-1.92658	-1.25172	FALSE	no hit
CCDC134	79879	1.43867	-0.3378	3.07223	1.58159	1.5192	0.647147	2.04673	1.86372	-0.92371	-1.01468	-0.897097	-0.859351	-1.68467	-0.65348	-2.48619	-1.91436	FALSE	no hit
CCL15	6359	1.03954	0.760257	1.62963	0.728734	2.02812	0.98743	3.72133	1.37561	-1.83272	-0.961217	-2.50859	-2.02836	-2.0432	-1.16452	-2.76118	-2.20389	FALSE	no hit
CCL28	56477	0.779071	-0.833028	1.01527	2.15497	1.62145	0.167104	3.90739	0.789864	-0.522345	-1.61423	-2.2378	2.285	-0.971287	-0.920306	-2.34863	0.355076	FALSE	no hit
CCND3	896	-1.30555	-2.35806	-1.99587	0.437262	-0.523198	-0.890206	0.2791	-0.958487	-1.01802	-1.58234	-4.04792	2.57619	0.130098	0.126218	-1.92028	2.18436	TRUE	no hit
CCR8	1237	0.301758	-1.10552	0.741319	1.26948	1.83596	0.683605	4.25627	0.567992	-0.50551	-1.47501	-2.77624	2.73473	-0.510048	-0.578491	-2.52351	1.57185	FALSE	no hit
CD151	977	-1.65062	-1.55192	-2.01775	-1.3822	-1.74575	-1.11504	-2.791	-1.33123	-1.89036	-1.93738	-4.23546	0.501754	-0.358095	-0.869122	-1.97071	1.76555	FALSE	no hit
CD2	914	0.426004	-0.86203	0.384827	1.75522	1.54877	0.568152	3.27942	0.798739	-0.266161	-1.45595	-2.3592	3.01667	-0.455451	-0.735615	-2.08576	1.45503	FALSE	no hit
C1QTNF7	114905	2.55552	0.598062	3.78441	3.28408	-0.813683	-0.695758	-1.86066	0.115373	2.75301	1.09284	3.81192	3.35426	0.526446	0.981594	0.121322	0.476422	FALSE	no hit
C3	718	1.32675	0.118839	0.849974	3.01144	2.07782	0.221792	5.37267	0.638991	0.635635	-0.134315	1.05308	0.988143	-0.466077	0.0108149	-0.0758517	-1.3332	FALSE	no hit
C6orf15	29113	0.985171	0.112886	1.2614	1.58123	0.618329	0.233945	1.18617	0.434869	-0.688842	-0.450275	-0.517688	-1.09856	-1.18567	-0.209475	-1.30172	-2.04581	FALSE	no hit
CA11	770	0.944505	0.149293	1.4319	1.25232	1.61507	0.446622	3.39571	1.00286	-0.464887	-0.405206	-0.731108	-0.258346	-0.986966	-0.303721	-1.52826	-1.12892	FALSE	no hit
CAB39L	81617	1.61019	0.530449	1.63622	2.6639	1.95292	0.6593	4.11672	1.08274	-0.0605305	-0.201956	-0.653149	0.673513	-1.0998	-0.274979	-1.63404	-1.39038	FALSE	no hit
CACNA2D2	9254	0.785226	-0.400854	1.35638	1.40015	1.65414	0.695758	3.32594	0.940737	-0.0549643	-0.420431	-0.0778218	0.33336	-0.631226	0.00113291	-1.1655	-0.729308	FALSE	no hit
CACNG8	59283	1.44856	0.299405	2.34124	1.70503	1.80056	0.598535	3.60504	1.19811	-1.11681	-0.4674	-0.685781	-2.19725	-1.86293	-0.451166	-2.01846	-3.11918	FALSE	no hit
CALCRL	10203	0.939953	-0.515177	1.32557	2.00947	2.03298	0.622841	4.53537	0.940737	-1.55917	-1.01955	-2.13263	-1.52532	-1.91502	-0.502389	-2.43042	-2.81224	FALSE	no hit
CAMK2A	815	0.0166154	-0.850854	0.727556	0.173145	0.124046	-0.422316	1.25595	-0.461494	-1.98683	-1.16216	-2.43882	-2.35952	-1.5746	-0.469655	-2.26175	-1.9924	FALSE	no hit
CAPG	822	0.240935	-1.51334	0.0497069	2.18644	-0.535838	-0.64107	-0.558199	-0.408244	-2.06128	-1.47258	-3.34176	-1.36951	-1.91645	-0.384269	-2.57328	-2.79181	FALSE	no hit
CAPN9	10753	1.922	0.308542	2.18585	3.27161	0.802207	0.337245	1.09314	0.976237	-0.350066	-0.389131	-1.69761	1.03654	-1.44421	-0.3787	-2.57637	-1.37755	FALSE	no hit
CARS	833	1.03497	0.042048	1.62749	1.43537	1.74441	0.446622	5.55873	-0.772114	-1.59766	-1.18088	-2.17248	-1.43962	-1.94416	-1.01057	-2.63923	-2.18268	FALSE	no hit
CASP9	842	1.53523	-0.490247	3.49147	1.60447	1.27813	0.8659	2.11651	0.851988	-1.25493	-0.791071	-1.32766	-1.64605	-1.93952	-0.305158	-2.93048	-2.58291	FALSE	no hit
CBLN1	869	1.22164	0.049243	1.52223	2.09343	1.01921	0.495234	2.16302	0.39937	-0.347954	-0.691329	-0.952674	0.600141	-1.10861	-0.524228	-1.79057	-1.01103	FALSE	no hit
CCDC180	100499483	0.870106	0.16576	1.39618	1.04838	2.40962	1.24872	4.30279	1.67735	-1.72026	-0.918866	-2.67588	-1.56605	-1.94728	-0.841317	-2.82507	-2.17544	FALSE	no hit
CCL16	6360	1.20859	-0.0640365	3.4784	0.211416	0.586569	-0.17318	1.79089	0.141998	-1.68907	-1.25881	-1.02697	-2.78145	-2.06099	-1.00791	-2.77227	-2.40278	FALSE	no hit
CCL3	6348	0.177743	-0.808342	0.605082	0.736488	1.61569	0.695758	3.32594	0.825364	-1.44714	-1.54893	-3.38701	0.594513	-1.25292	-0.914627	-2.89375	0.0496108	FALSE	no hit
CCNE1	898	1.22194	0.745201	1.74152	1.17911	1.5361	0.325092	3.39571	0.887488	0.729154	-0.741381	1.42022	1.50862	-0.378628	-0.981008	-0.345993	0.191119	FALSE	no hit
CCR9	10803	1.07251	-0.120998	0.872305	2.46622	1.52457	0.452699	2.86077	1.26023	0.00886664	-1.06777	-2.39062	3.48498	-0.643256	-0.810413	-2.32253	1.20318	FALSE	no hit
CD160	11126	-0.0488305	-1.1238	0.532369	0.444937	0.516642	0.142798	1.06988	0.337245	-0.853731	-1.74763	-2.95251	2.13895	-0.548283	-0.882944	-2.53608	1.77418	FALSE	no hit
CD200	4345	0.771762	-1.11333	0.228978	3.19964	1.86547	0.288633	4.3493	0.958487	0.0235536	-1.27907	-1.7397	3.08943	-0.55698	-0.436901	-1.57726	0.343224	FALSE	no hit
C1QTNF8	390664	-0.863035	-0.194728	-1.88454	-0.50984	-2.67548	-1.44924	-4.16324	-2.41397	-0.770795	-0.827842	-0.710377	-0.774168	-0.0158372	-0.471431	0.432996	-0.00907647	FALSE	no hit
C3AR1	719	-0.117734	0.787524	-0.477038	-0.663687	-1.48214	-0.74437	-2.62819	-1.07386	-0.427387	-0.0816443	-0.371509	-0.829009	-0.135371	-0.235905	-0.241837	0.0716302	FALSE	no hit
C6orf58	352999	1.41846	0.537783	2.54531	1.1723	1.29533	-0.0455737	2.69796	1.23361	0.0659441	-0.558274	0.999314	-0.243208	-0.896455	-0.654959	-0.995678	-1.03873	FALSE	no hit
CA12	771	0.674453	-0.101098	0.735701	1.38876	0.56625	0.0455737	1.20943	0.443744	-0.467666	-0.746268	-0.120387	-0.536343	-0.67699	-0.481987	-0.146517	-1.40247	FALSE	no hit
CABP1	9478	1.27366	0.310065	2.07005	1.44086	1.1125	0.0516502	2.06999	1.21586	-0.521277	-0.785806	-0.740136	-0.0378894	-1.22937	-0.765762	-1.87218	-1.05017	FALSE	no hit
CACNA2D3	55799	0.666398	-0.558939	2.15263	0.405507	1.06024	0.233945	2.5119	0.434869	-1.43434	-0.80541	-0.980971	-2.51664	-1.61094	-0.0979946	-2.00258	-2.73224	FALSE	no hit
CACTIN	58509	1.35969	-0.60346	2.01058	2.67193	1.89905	0.495234	4.65166	0.550242	-0.979806	-1.28994	-1.57893	-0.0705553	-1.67545	-0.720324	-2.45194	-1.85409	FALSE	no hit
CALM1	801	1.00056	-0.328886	1.4081	1.92247	1.27016	0.410163	3.30268	0.0976237	-1.4235	-0.997009	-1.85452	-1.41898	-1.87553	-0.631824	-2.33714	-2.65762	FALSE	no hit
CAMK2B	816	0.713496	-0.92698	0.354543	2.71293	0.661237	-0.00303825	2.09325	-0.106499	-1.62875	-1.50979	-2.98801	-0.388465	-1.81165	-0.75992	-2.39531	-2.27972	FALSE	no hit
CAPN1	823	0.70286	-0.628489	0.446451	2.29062	0.429466	0.167104	1.51179	-0.390495	-1.12333	-1.05046	-2.4247	0.105168	-1.38162	-0.421949	-2.1609	-1.562	FALSE	no hit
CAPNS1	826	1.18551	-0.911879	3.76612	0.702292	1.88938	0.483081	4.09346	1.09161	-1.09606	-1.55638	-0.901696	-0.830097	-1.6206	-0.840624	-2.85811	-1.16307	FALSE	no hit
CARS2	79587	-0.0704605	-0.843981	-0.0936355	0.726235	-1.34171	-1.1515	-1.79089	-1.08274	-1.34443	-1.26952	-3.71022	0.946443	-0.950912	-0.518375	-2.6638	0.329438	FALSE	no hit
CASQ1	844	1.06809	-0.812201	2.4764	1.54007	1.83911	0.306863	4.16324	1.04724	-1.2727	-1.46311	-2.02491	-0.330072	-1.68708	-0.766512	-2.96805	-1.32668	FALSE	no hit
CBLN2	147381	0.695705	-1.23266	3.36463	-0.0448542	1.18865	0.240021	3.32594	0	-0.716854	-1.52143	-0.489659	-0.139473	-0.978523	-0.655608	-2.39095	0.110985	FALSE	no hit
CCDC25	55246	1.01791	-0.754577	2.93345	0.874866	1.95724	0.179257	3.83762	1.85485	-1.15474	-1.48203	-2.7111	0.728913	-1.41136	-0.854529	-3.60013	0.220591	FALSE	no hit
CCL17	6361	0.208217	-1.34523	1.81503	0.154853	0.888719	-0.00303825	2.65145	0.0177498	-1.88073	-2.22503	-2.38258	-1.03458	-1.74749	-1.38771	-2.87656	-0.978196	FALSE	no hit
CCL4	6351	0.534397	-1.2447	0.0651395	2.78275	-1.46414	-1.01781	-2.74448	-0.630116	-0.921867	-2.0497	-3.23922	2.52332	-1.01726	-1.12586	-2.48382	0.557907	FALSE	no hit
CCNE2	9134	-0.448298	-0.836734	-1.16922	0.661055	-1.95333	-1.75307	-2.65145	-1.45548	-1.34628	-1.85655	-3.60311	1.42081	-0.814498	-1.12597	-2.11052	0.792995	FALSE	no hit
CCRL2	9034	1.27604	-0.0167322	0.521918	3.32295	2.45387	0.246098	6.0239	1.09161	-0.222651	-1.28062	-2.91902	3.53168	-0.981984	-1.04732	-2.46363	0.564997	FALSE	no hit
CD163	9332	0.934463	-0.717936	0.127962	3.39336	1.73753	0.720064	2.93055	1.56198	-0.167307	-1.57498	-2.63399	3.70704	-0.753144	-0.964092	-2.08238	0.78704	FALSE	no hit
CD200R1	131450	-0.0192329	-1.02962	0.721058	0.250864	-0.0303154	-0.161027	0.558199	-0.488118	-0.404972	-1.28185	-2.10906	2.17599	-0.155835	-0.441899	-2.05745	2.03185	FALSE	no hit
C1R	715	1.70937	1.80761	2.80488	0.515618	1.79233	0.331169	3.76784	1.27798	1.28375	0.489291	2.75616	0.605782	-0.0428848	-0.308286	-0.103811	0.283443	FALSE	no hit
C3orf33	285315	0.500159	0.473071	0.499115	0.52829	-0.238873	0.0698797	-0.697749	-0.0887488	0.163569	0.0471154	0.551028	-0.107437	-0.185514	0.02424	-0.0938133	-0.486968	FALSE	no hit
C7	730	0.935427	0.945647	1.00366	0.856976	0.649307	-0.258251	1.55831	0.647866	-1.13788	-0.484404	-0.911561	-2.01768	-1.52753	-0.814047	-1.39562	-2.37293	FALSE	no hit
CA13	377677	0.873491	-0.804211	2.37818	1.04651	1.25004	0.458775	2.76774	0.523618	-0.897612	-1.05195	-0.580603	-1.06028	-1.27382	-0.373034	-1.93353	-1.51491	FALSE	no hit
CACHD1	57685	0.417698	-0.210485	1.43153	0.0320503	1.15795	0.367628	3.37245	-0.266246	-1.36407	-0.691681	-1.16687	-2.23365	-1.31011	-0.363092	-1.75805	-1.80918	FALSE	no hit
CACNA2D4	93589	0.609918	0.252242	0.085915	1.4916	0.980167	-0.148874	2.13976	0.949612	-1.32299	-0.678438	-1.84771	-1.44282	-1.466	-0.596005	-1.50151	-2.30048	FALSE	no hit
CACYBP	27101	1.40281	-0.954609	2.74006	2.42297	0.683409	-0.312939	1.88392	0.479243	-0.357368	-1.34153	0.286183	-0.0167598	-1.29059	-0.598413	-1.55276	-1.72058	FALSE	no hit
CALM2	805	0.394394	-0.295533	-0.405257	1.88397	-0.833186	-1.1515	-0.558199	-0.789864	-1.53409	-1.11909	-2.26811	-1.21508	-1.56585	-0.739346	-1.55663	-2.40156	FALSE	no hit
CAMK2D	817	1.38868	-0.403156	1.70626	2.86293	1.43946	0.0881092	3.20965	1.02061	-0.907226	-0.957475	-1.54506	-0.219143	-1.68598	-0.510658	-2.28608	-2.2612	FALSE	no hit
CAPN10	11132	1.00692	-0.932957	0.981573	2.97215	0.617917	-0.227868	2.41886	-0.337245	-1.27193	-1.17806	-1.90151	-0.736204	-1.74859	-0.480551	-2.04184	-2.72337	FALSE	no hit
CAPS	828	1.89701	0.277609	3.70818	1.70524	2.59983	0.756523	6.27974	0.76324	-0.94105	-0.583408	-1.2514	-0.988344	-1.85367	-0.535281	-3.03852	-1.98722	FALSE	no hit
CARTPT	9607	-0.203643	-0.821946	1.01095	-0.799932	-1.83949	-1.20618	-2.58167	-1.7306	-1.94811	-1.33061	-1.97494	-2.53877	-1.37212	-0.628492	-2.13914	-1.34873	FALSE	no hit
CASQ2	845	0.305489	-0.501363	0.431112	0.98672	0.247146	-0.53777	0.604716	0.674491	-2.25039	-1.3224	-3.84384	-1.58492	-1.96171	-0.822925	-2.97654	-2.08568	FALSE	no hit
CBLN3	643866	0.189764	-0.915163	1.86266	-0.378203	-0.0269077	-0.0516502	0.13955	-0.168623	-2.226	-1.11194	-3.4713	-2.09478	-1.81219	-0.385812	-3.54479	-1.50598	FALSE	no hit
CCDC3	83643	1.01676	-0.172139	0.66869	2.55372	2.5343	0.142798	6.27974	1.18036	-1.80061	-1.00648	-3.74759	-0.647764	-2.13218	-0.701221	-3.32275	-2.37257	FALSE	no hit
CCL18	6362	0.361872	-1.43255	0.722296	1.79586	-0.656225	-0.634994	-0.534941	-0.798739	-1.86094	-1.59405	-2.94329	-1.04548	-1.75952	-0.561274	-2.61592	-2.10136	FALSE	no hit
CCL4L2	9560	2.03341	0.293987	4.10255	1.70371	2.15522	0.568152	3.95391	1.9436	0.0839767	-0.852552	-1.50911	2.61359	-1.08484	-0.837274	-3.46546	1.04823	FALSE	no hit
CCNH	902	0.67029	-1.53714	1.2539	2.29411	-0.25524	-1.1758	0.907074	-0.496993	-0.50057	-1.77956	-2.63417	2.91202	-0.830765	-0.662324	-2.69508	0.865106	FALSE	no hit
CCS	9973	-0.507762	-2.90068	0.492419	0.884972	-1.80763	-1.85029	-2.41886	-1.15373	-0.976467	-1.50648	-3.0814	1.65848	-0.427076	0.540286	-2.5757	0.754184	FALSE	no hit
CD163L1	283316	0.754693	-0.083366	0.72884	1.61861	1.9602	0.306863	4.53537	1.03836	-0.875551	-1.322	-2.70451	1.39986	-1.15566	-1.04515	-2.50492	0.0830896	FALSE	no hit
CD200R1L	344807	1.15104	-0.913814	0.054497	4.31243	-0.417057	-0.531693	-0.302358	-0.417119	0.394661	-1.19914	-1.39301	3.77613	-0.483248	-0.438459	-1.26004	0.248757	FALSE	no hit
C1RL	51279	-1.4473	-0.586836	-0.520256	-3.23482	-3.9516	-2.13589	-6.8612	-2.85771	-0.581467	-0.172823	-0.0232577	-1.54832	0.951031	0.577548	0.234267	2.04128	TRUE	no hit
C3orf58	205428	1.55365	0.896639	1.82165	1.94265	1.65167	0.495234	3.27942	1.18036	0.725769	-0.0863645	1.28425	0.979424	-0.433739	-0.370677	-0.373544	-0.556995	FALSE	no hit
C7orf34	135927	-1.14341	-0.327126	-1.72335	-1.37974	-3.05656	-1.50393	-5.34941	-2.31634	-1.15638	-0.9569	-0.654629	-1.85761	0.107732	-0.421423	0.857495	-0.112877	TRUE	no hit
CA14	23632	0.703333	-0.614318	1.90416	0.820155	-1.82302	-1.09681	-3.20965	-1.16261	-0.674251	-0.85324	-0.230197	-0.939315	-0.986777	-0.220814	-1.46103	-1.27848	FALSE	no hit
CACNA1A	773	2.88305	0.791431	2.7424	5.11531	0.703031	0.0516502	1.60482	0.452619	0.263491	-0.679025	0.0999476	1.36955	-1.71309	-0.920146	-1.77315	-2.44597	FALSE	no hit
CACNB1	782	1.36907	-0.119962	2.13221	2.09496	1.72083	0.0759562	3.97717	1.10936	-0.524243	-1.10859	-0.0193965	-0.444739	-1.41853	-0.819496	-1.5126	-1.9235	FALSE	no hit
CAD	790	-0.68173	-1.67891	-0.706302	0.340021	-0.168057	-0.19141	-0.0465166	-0.266246	-2.53592	-2.13395	-3.05312	-2.42068	-1.80643	-1.1123	-2.14687	-2.16013	FALSE	no hit
CALM3	808	2.00446	-0.348463	3.2495	3.11235	2.43467	0.337245	5.39593	1.57085	-1.26999	-1.06336	-1.05734	-1.68927	-2.36417	-0.676619	-2.73432	-3.68156	FALSE	no hit
CAMK2G	818	1.29723	-1.1494	2.25222	2.78887	1.81346	0.367628	3.58178	1.49098	-1.34375	-1.50976	-1.53279	-0.988695	-1.86902	-0.645719	-2.50353	-2.45781	FALSE	no hit
CAPN11	11131	1.21781	-0.522003	1.63088	2.54455	0.916291	-0.0151912	2.30257	0.461494	-1.5611	-0.892343	-2.27033	-1.52063	-2.07429	-0.351349	-2.72387	-3.14765	FALSE	no hit
CAPZA1	829	2.82339	-0.343462	4.90583	3.90781	2.18942	0.726141	4.58189	1.26023	-0.292418	-0.865713	0.194838	-0.206379	-2.09172	-0.496412	-2.77856	-3.00019	FALSE	no hit
CASK	8573	2.21655	-0.946082	3.32469	4.27104	-0.194291	-0.774753	0.0232583	0.168623	-0.875748	-1.40994	-1.47184	0.254534	-2.1987	-0.636651	-3.04183	-2.91762	FALSE	no hit
CASR	846	0.419486	-1.34012	0.661934	1.93665	-0.306472	-0.112415	-0.372133	-0.434869	-2.27677	-1.49582	-3.73549	-1.599	-2.07844	-0.487241	-3.09589	-2.65218	FALSE	no hit
CBLN4	140689	0.634837	-1.51515	4.15209	-0.732422	1.17561	0.106339	3.16313	0.257371	-1.52195	-1.76466	-0.801122	-2.00007	-1.58244	-0.710883	-3.02036	-1.01608	FALSE	no hit
CCDC30	728621	-1.47428	-2.96401	0.890742	-2.34956	-3.33864	-2.12981	-4.93076	-2.95533	-2.70793	-2.17745	-3.23454	-2.7118	-1.12391	-0.0842669	-2.91336	-0.374098	FALSE	no hit
CCL19	6363	1.44522	-0.564905	1.80612	3.09444	1.67403	0.489158	3.32594	1.20698	-1.78099	-1.19869	-3.34785	-0.796411	-2.33225	-0.678723	-3.46165	-2.85639	FALSE	no hit
CCL5	6352	0.538087	-0.855669	0.937589	1.53234	0.434251	-0.0820327	1.16292	0.221872	-1.22208	-1.65254	-3.92495	1.91126	-1.22925	-0.962908	-3.31927	0.594431	FALSE	no hit
CCNT1	904	0.297056	-1.95999	0.967073	1.88408	-0.0624725	-0.404087	0.465166	-0.248497	-0.933007	-1.8524	-4.57327	3.62665	-0.630258	-0.455941	-3.88828	2.45345	FALSE	no hit
CCT2	10576	1.1416	-1.31131	1.87548	2.86062	1.22266	0.0151912	2.2328	1.41998	-0.223925	-1.35183	-1.5008	2.18086	-1.00782	-0.41068	-2.29781	-0.314962	FALSE	no hit
CD164	8763	-1.43653	-1.85765	-1.66034	-0.791599	-1.16946	-0.920589	-0.883815	-1.70398	-2.14819	-1.54557	-4.44187	-0.457128	-0.569198	0.0517823	-2.26039	0.501012	FALSE	no hit
CD207	50489	1.75384	-0.155516	2.65949	2.75756	0.552785	0.00303825	1.25595	0.39937	-0.191035	-1.16927	-1.81828	2.41444	-1.15154	-0.84755	-2.8397	0.232646	FALSE	no hit
C1S	716	2.53978	0.892671	3.63704	3.08964	0.723618	0.227868	1.04662	0.896363	2.44119	0.759143	3.35497	3.20945	0.270389	0.465812	-0.0918723	0.437226	FALSE	no hit
C4A	720	0.912158	0.481484	2.09985	0.155142	2.39526	0.227868	6.07042	0.887488	0.431113	0.20831	1.54486	-0.459827	-0.11505	0.288487	-0.283436	-0.3502	FALSE	no hit
C8A	731	1.80932	0.444892	1.90343	3.07962	1.21281	-0.00303825	2.37235	1.26911	0.215961	-0.385967	-0.169395	1.20324	-1.06983	-0.435683	-1.48499	-1.28881	FALSE	no hit
CA2	760	-1.67219	-2.99185	-0.180732	-1.84398	-3.76934	-2.12373	-6.81468	-2.36959	-1.73219	-2.08173	-0.865269	-2.24959	-0.377002	-0.0562477	-0.635343	-0.439414	FALSE	no hit
CACNA1B	774	1.69094	0.308637	2.49224	2.27195	1.4623	0.258251	2.93055	1.19811	-0.609892	-0.645579	-0.192316	-0.99178	-1.6323	-0.573822	-1.82535	-2.49772	FALSE	no hit
CACNB2	783	0.274359	-1.0673	-0.443271	2.33365	-1.01754	-0.720064	-1.60482	-0.72774	-0.780678	-1.05471	-1.12162	-0.165709	-0.883979	-0.137648	-0.783621	-1.73067	FALSE	no hit
CADM1	23705	1.69022	-0.370052	1.81454	3.62617	1.24563	-0.118492	3.16313	0.692241	-0.470823	-0.686034	-0.735668	0.00923247	-1.53425	-0.234214	-1.72509	-2.64346	FALSE	no hit
CALML3	810	0.604446	-1.06369	0.69553	2.18149	0.839404	0.0151912	1.83741	0.665616	-1.4563	-1.30867	-1.39359	-1.66664	-1.65147	-0.444536	-1.59821	-2.91166	FALSE	no hit
CAMK4	814	0.686945	-1.68703	1.10583	2.64204	-1.2882	-0.792982	-2.13976	-0.931862	-1.50706	-1.41906	-2.32883	-0.773298	-1.61439	-0.154903	-2.32709	-2.36118	FALSE	no hit
CAPN12	147968	2.96534	0.143214	3.40893	5.34387	2.15492	0.355475	5.37267	0.736615	-0.0080626	-0.586457	0.357528	0.204741	-2.05366	-0.483698	-1.92444	-3.75285	FALSE	no hit
CAPZA2	830	1.65467	-0.412963	3.53037	1.84661	1.51969	0.361551	2.20954	1.98797	-1.12903	-0.941812	-1.09856	-1.34671	-1.98797	-0.546603	-2.87442	-2.54288	FALSE	no hit
CASP1	834	2.13676	-0.901111	3.4866	3.82481	1.9915	0.440546	4.44234	1.09161	-1.48743	-1.29863	-2.6643	-0.499348	-2.5252	-0.535324	-3.8432	-3.19708	FALSE	no hit
CAST	831	2.2118	-0.604589	4.26287	2.97712	1.42291	0.306863	2.48864	1.47323	-1.31626	-1.42745	-1.62448	-0.896861	-2.45527	-0.885486	-3.53204	-2.94829	FALSE	no hit
CBR1	873	1.90192	-0.552657	3.60633	2.6521	0.138753	-0.555999	1.06988	-0.0976237	-0.933429	-1.18399	-2.19995	0.583654	-1.87368	-0.537801	-3.64805	-1.4352	FALSE	no hit
CCDC70	83446	1.71958	-0.0923262	3.11104	2.14001	1.41437	0.379781	3.04684	0.816489	-1.08557	-1.01945	-2.16132	-0.07595	-1.90646	-0.763396	-3.39548	-1.5605	FALSE	no hit
CCL2	6347	1.79808	0.235398	3.62744	1.53142	1.50343	0.671453	2.41886	1.41998	-2.01482	-1.40302	-2.63399	-2.00745	-2.64984	-1.28537	-3.90717	-2.75698	FALSE	no hit
CCL7	6354	1.75703	-0.300263	3.86242	1.70895	0.482076	0.0941856	0.837299	0.514743	-0.568745	-1.33746	-2.78015	2.41137	-1.41403	-0.944637	-4.1649	0.867433	FALSE	no hit
CCNY	219771	1.60566	-0.541515	2.57061	2.78787	1.20928	0.106339	3.13987	0.38162	0.510616	-0.971101	-2.22684	4.72979	-0.479005	-0.47573	-3.10448	2.14319	FALSE	no hit
CCT3	7203	0.0318528	-2.0666	1.70032	0.461836	0.617764	-0.586382	1.90718	0.532493	-0.798344	-1.63495	-3.00372	2.24364	-0.514317	-0.0471186	-3.16936	1.67352	FALSE	no hit
CD164L2	388611	1.33967	-0.599267	1.79503	2.82326	1.68156	0.367628	3.37245	1.30461	-0.658346	-1.33723	-3.28635	2.64854	-1.29678	-0.809591	-3.34624	0.26548	FALSE	no hit
CD209	30835	2.41875	-0.406792	3.74784	3.9152	2.10993	0.653223	3.39571	2.28084	0.306861	-0.945928	-1.56423	3.43074	-1.23817	-0.483511	-3.26412	0.0331054	FALSE	no hit
C1orf116	79098	1.24994	0.923122	1.63135	1.19535	0.279647	-0.0577267	0.488424	0.408244	1.44143	0.483681	1.25663	2.58399	0.488163	0.140078	-0.215861	1.54027	FALSE	no hit
C4B	721	2.05874	1.42197	2.56776	2.18649	2.33788	1.26087	3.60504	2.14772	0.451648	0.0362719	0.599381	0.71929	-0.878025	-0.534567	-1.24822	-0.851285	FALSE	no hit
C8B	732	2.04881	0.384736	3.19484	2.56685	0.649978	0.391934	1.06988	0.488118	0.467522	-0.262059	1.82713	-0.1625	-0.986775	-0.179376	-0.763489	-2.01746	FALSE	no hit
CA3	761	1.27335	-0.190208	1.57747	2.43279	1.1019	0.17318	2.20954	0.922987	-0.25607	-1.00367	0.302685	-0.067226	-1.12711	-0.648471	-0.828882	-1.90399	FALSE	no hit
CACNA1C	775	1.58227	-0.064264	3.02016	1.79091	2.03674	0.671453	4.97728	0.461494	-0.772591	-0.990944	-0.025306	-1.30152	-1.71478	-0.73247	-2.01742	-2.39444	FALSE	no hit
CACNB3	784	1.62636	-0.47108	1.63195	3.71821	1.58317	0.391934	4.04694	0.310621	-0.3186	-1.03304	-0.997572	1.07481	-1.38164	-0.572656	-1.83302	-1.73923	FALSE	no hit
CADM3	57863	1.24786	-0.645146	1.6469	2.74181	1.43164	0.240021	3.25616	0.798739	-1.12763	-1.37101	-0.941026	-1.07084	-1.82637	-0.796948	-1.80227	-2.8799	FALSE	no hit
CALML5	51806	1.04712	-0.735563	1.71944	2.15749	0.115724	-0.39801	0.186066	0.559117	-1.43103	-1.19571	-1.3197	-1.77767	-1.92166	-0.549925	-2.0903	-3.12476	FALSE	no hit
CAMKK1	84254	1.95496	-0.728154	1.6334	4.95964	2.29446	0.319016	5.23312	1.33123	-0.951516	-1.24826	-1.48481	-0.121485	-2.14787	-0.626932	-2.18787	-3.62881	FALSE	no hit
CAPN13	92291	2.39205	-0.21377	2.45384	4.93607	2.06491	0.835518	4.11672	1.24248	-0.726897	-0.892816	-0.699815	-0.588062	-2.22426	-0.56138	-2.07298	-4.03841	FALSE	no hit
CAPZB	832	2.81075	-0.136643	4.90294	3.66596	2.2518	0.325092	5.79132	0.638991	0.026169	-0.671389	0.791713	-0.0418172	-1.84436	-0.416489	-2.3921	-2.72451	FALSE	no hit
CASP10	843	1.56775	-0.99313	2.8016	2.89479	1.03851	0.319016	2.13976	0.656741	-1.83575	-1.4338	-2.89933	-1.17414	-2.46945	-0.665635	-3.68734	-3.05537	FALSE	no hit
CAT	847	2.57734	-0.576597	3.98235	4.32626	1.65205	0.549923	3.46549	0.940737	-0.795903	-1.4075	-1.87157	0.891365	-2.27071	-0.869658	-3.59115	-2.35132	FALSE	no hit
CBR3	874	1.52575	-0.636075	1.22572	3.9876	1.41488	0.124568	3.41897	0.701115	-1.0287	-1.43436	-2.79932	1.14757	-1.89103	-0.873133	-2.85556	-1.94439	FALSE	no hit
CCDC80	151887	1.47188	-0.293753	2.2984	2.41098	1.00639	0.185333	2.37235	0.461494	-1.76002	-1.41442	-3.16746	-0.698173	-2.31374	-1.05411	-3.61248	-2.27463	FALSE	no hit
CCL20	6364	2.47235	0.460035	2.58603	4.371	2.93747	0.847671	5.67503	2.28972	-1.231	-1.0903	-2.91059	0.3079	-2.55076	-1.12545	-3.6053	-2.92153	FALSE	no hit
CCL8	6355	0.390641	-1.09435	1.27396	0.992314	2.02536	0.483081	4.27953	1.31348	-0.536065	-1.46004	-2.58864	2.44048	-0.641949	-0.623911	-2.75251	1.45058	FALSE	no hit
CCR1	1230	1.40001	-1.24295	2.66639	2.7766	2.60568	0.786906	6.00064	1.02949	-0.181201	-1.55165	-1.87173	2.87978	-1.09881	-0.643474	-2.95916	0.306194	FALSE	no hit
CCT4	10575	-0.25485	-1.71277	0.431294	0.516924	0.820063	-0.507387	2.6747	0.292871	-0.811451	-1.77221	-2.37742	1.71528	-0.461342	-0.58754	-1.96918	1.1727	FALSE	no hit
CD177	57126	0.890782	-0.809126	1.08458	2.3969	1.22211	0.495234	2.37235	0.798739	-0.128702	-1.42145	-1.43483	2.47017	-0.735841	-0.713538	-1.80119	0.307203	FALSE	no hit
CD22	933	1.22221	-0.778891	2.27652	2.16899	2.20404	0.373704	5.09357	1.14486	0.0165206	-1.20309	-1.48926	2.74192	-0.661548	-0.48538	-2.4485	0.949238	FALSE	no hit
C1orf123	54987	1.05499	1.03158	1.67246	0.460935	-0.207647	-0.440546	0.2791	-0.461494	0.744393	0.63899	1.79636	-0.202169	-0.0639994	0.277339	0.0358204	-0.505158	FALSE	no hit
C4BPA	722	-0.175723	0.253723	-0.864848	0.0839576	-1.31422	-0.750447	-1.6746	-1.5176	-0.167151	-0.175365	-0.583335	0.257246	0.136706	-0.0785285	0.0345507	0.454096	TRUE	no hit
C8G	733	1.48493	0.530319	2.46501	1.45947	1.25723	0.525617	2.65145	0.594617	-0.17912	-0.198758	0.628163	-0.966765	-1.07084	-0.250514	-1.20116	-1.76084	FALSE	no hit
CA4	762	0.692985	-0.105116	1.28801	0.896064	1.32516	0.0638032	3.32594	0.585742	-0.747145	-0.346946	-0.528402	-1.36609	-0.875156	-0.0401163	-0.841145	-1.74421	FALSE	no hit
CACNA1D	776	1.0697	-0.30398	0.924332	2.58874	0.547583	0.00303825	1.30246	0.337245	-0.78517	-0.818605	-2.02564	0.488736	-1.31955	-0.441629	-2.12232	-1.39471	FALSE	no hit
CACNB4	785	0.143508	-1.49093	1.38687	0.534584	-0.0141178	-0.489158	0.162808	0.283996	-1.3559	-1.37128	-1.40669	-1.28973	-1.25534	-0.297255	-1.9967	-1.47208	FALSE	no hit
CADM4	199731	2.19298	0.0225825	3.40204	3.1543	2.38361	0.19141	5.81458	1.14486	-0.190312	-0.692552	0.08258	0.0390351	-1.60394	-0.48227	-2.10698	-2.22258	FALSE	no hit
CALN1	83698	0.470455	-0.262675	0.619396	1.05464	1.45766	0.446622	3.16313	0.76324	-1.9408	-1.12722	-1.97332	-2.72186	-1.95597	-0.777109	-1.95291	-3.1379	FALSE	no hit
CAMKK2	10645	2.0029	-0.0326955	2.64462	3.39678	0.654448	-0.106339	1.58156	0.488118	-0.683119	-0.97915	-0.339545	-0.730661	-1.90587	-0.756445	-1.87366	-3.0875	FALSE	no hit
CAPN14	440854	1.01123	-1.48846	2.23878	2.28336	0.820626	-0.27648	2.41886	0.319496	-1.22065	-1.71341	-0.199009	-1.74953	-1.78521	-0.655191	-1.63604	-3.06439	FALSE	no hit
CARD11	84433	1.6149	-0.431842	3.02953	2.247	0.267802	-0.179257	0.814041	0.168623	-1.11275	-0.449973	-0.962684	-1.9256	-1.93719	-0.0323294	-2.58004	-3.1992	FALSE	no hit
CASP14	23581	1.92068	0.746849	2.65519	2.36	2.71176	0.622841	5.48896	2.02347	-1.23044	-0.351978	-2.02142	-1.31792	-2.16614	-0.58349	-3.06111	-2.85383	FALSE	no hit
CATSPER1	117144	1.48226	-0.657388	3.49676	1.6074	1.26686	-0.0394972	3.02358	0.816489	-1.11747	-1.10741	-1.36507	-0.879921	-1.83841	-0.549158	-2.98711	-1.97896	FALSE	no hit
CBR4	84869	1.27554	-1.29382	4.15086	0.969575	0.966425	0.513464	1.60482	0.780989	-1.2994	-1.3919	-2.07373	-0.432568	-1.71435	-0.452529	-3.76209	-0.928427	FALSE	no hit
CCK	885	0.919995	-1.09153	2.56742	1.2841	1.25023	-0.124568	2.53515	1.34011	-1.95963	-1.32496	-3.32224	-1.23169	-2.10662	-0.496384	-3.84475	-1.97873	FALSE	no hit
CCL21	6366	0.252942	-0.9973	0.0455185	1.71061	1.53484	-0.0820327	3.67481	1.01174	-1.93233	-1.41031	-3.84554	-0.54114	-1.75153	-0.666855	-2.9273	-1.66042	FALSE	no hit
CCNA1	8900	0.688291	-1.54194	1.15001	2.45681	1.43064	0.106339	3.39571	0.789864	0.0106545	-1.53313	-2.6413	4.2064	-0.391753	-0.438307	-2.70821	1.97126	FALSE	no hit
CCR10	2826	0.839869	-1.25393	2.2841	1.48943	1.07878	-0.136721	3.00032	0.372745	0.294089	-1.54773	-0.847854	3.27786	-0.199602	-0.604255	-1.78527	1.79072	FALSE	no hit
CCT5	22948	3.04249	-1.18274	10.1657	0.144532	0.527856	-0.233945	1.1164	0.701115	2.80968	-1.39907	7.63375	2.19438	0.231472	-0.485369	-0.794278	1.97406	FALSE	no hit
CD180	4064	0.355875	-0.806327	0.762308	1.11164	1.14969	0.197486	2.6747	0.576867	-0.55316	-1.048	-2.95994	2.34846	-0.495693	-0.240139	-2.65079	1.40385	FALSE	no hit
CD226	10666	0.111101	-2.33067	1.52085	1.14312	0.419624	-0.233945	0.907074	0.585742	-0.549659	-1.75951	-2.35942	2.46995	-0.437228	-0.0779993	-2.67632	1.44264	FALSE	no hit
C1orf27	54953	0.852979	1.25121	1.41395	-0.106224	-0.378939	-0.306863	-0.581458	-0.248497	0.16175	0.993269	0.495636	-1.00365	-0.272467	0.539237	-0.690085	-0.666552	FALSE	no hit
C4BPB	725	-0.342144	-0.0873463	-0.977719	0.0386345	-0.462236	-1.04212	0.418649	-0.76324	-1.05022	-0.274271	-1.37563	-1.50077	-0.612449	0.073536	-0.718495	-1.19239	FALSE	no hit
C8orf44-SGK3	100533105	1.55187	-0.0268637	1.76389	2.91858	0.863613	-0.124568	2.20954	0.505868	-0.0635163	-0.390409	0.169732	0.0301286	-1.1107	-0.157041	-1.20358	-1.97149	FALSE	no hit
CA5A	763	0.728712	-0.963171	0.864384	2.28492	0.282321	-0.361551	1.09314	0.115373	-0.438643	-0.666661	-0.851497	0.202228	-0.860894	0.120314	-1.32022	-1.38278	FALSE	no hit
CACNA1E	777	0.928677	0.133429	0.716223	1.93638	1.75614	0.240021	4.25627	0.772114	-1.09781	-0.88783	-1.69186	-0.713749	-1.50902	-0.765789	-1.81398	-1.9473	FALSE	no hit
CACNG1	786	0.143219	-0.662156	0.373265	0.718549	0.676288	0.100262	1.69786	0.230747	-1.65401	-0.806027	-1.45787	-2.69812	-1.47308	-0.157981	-1.43445	-2.82682	FALSE	no hit
CADPS	8618	0.594403	-0.921081	1.00031	1.70397	1.36297	-0.0881092	3.88414	0.292871	-1.62321	-1.48756	-1.72307	-1.65899	-1.77982	-0.717068	-2.02425	-2.59813	FALSE	no hit
CALR	811	1.4646	-0.146794	1.20398	3.33661	0.712674	-0.434469	2.09325	0.479243	-1.42561	-1.42886	-1.73179	-1.11619	-2.23014	-1.14648	-2.14975	-3.39418	FALSE	no hit
CAMKV	79012	0.90662	-0.202848	1.66316	1.25955	1.42374	0.17318	2.65145	1.44661	-1.39505	-1.13736	-1.66568	-1.3821	-1.71388	-0.787854	-2.30891	-2.04489	FALSE	no hit
CAPN15	6650	1.66798	-0.156945	1.81099	3.34989	0.518095	0.343322	0.2791	0.931862	-1.17334	-1.16542	-1.24454	-1.11007	-2.16307	-0.872504	-2.15432	-3.46238	FALSE	no hit
CARD16	114769	1.12387	-0.694286	1.84484	2.22106	0.747391	0.0151912	1.04662	1.18036	-1.82265	-1.39912	-2.7282	-1.34063	-2.24479	-0.811173	-3.09607	-2.82713	FALSE	no hit
CASP2	835	0.728388	-1.101	2.96128	0.324889	-0.279895	-0.598535	0.255841	-0.496993	-1.9172	-1.55055	-1.81743	-2.38361	-2.02193	-0.769092	-3.12898	-2.16772	FALSE	no hit
CATSPER2	117155	2.3184	0.200513	3.56175	3.19294	5.69384	2.47009	10.7686	3.84282	-1.40846	-0.803075	-3.07538	-0.346915	-2.49162	-0.739029	-4.14645	-2.58939	FALSE	no hit
CC2D1A	54862	0.574712	-1.02821	2.31594	0.436402	0.35987	-0.0334207	1.13966	-0.0266246	-2.03734	-1.38736	-3.29261	-1.43204	-1.91872	-0.592837	-3.66146	-1.50185	FALSE	no hit
CCKAR	886	0.518901	-1.09342	2.49437	0.155752	0.396928	0.0394972	0.814041	0.337245	-2.57402	-1.53928	-3.34794	-2.83484	-2.32027	-0.698422	-3.80354	-2.45884	FALSE	no hit
CCL22	6367	-0.0871729	-1.09365	0.346839	0.485295	1.51397	0.0273442	3.02358	1.49098	-2.35534	-1.48828	-3.79257	-1.78517	-1.78549	-0.560325	-2.98326	-1.8129	FALSE	no hit
CCNA2	890	-1.63757	-1.62878	-1.65248	-1.63144	-0.675689	-0.853747	-0.907074	-0.266246	-2.33007	-2.12909	-4.63426	-0.226864	-0.791389	-1.02706	-2.52453	1.17743	FALSE	no hit
CCR2	729230	-1.01853	-2.0131	-0.138393	-0.904092	-0.339885	-0.932742	0.232583	-0.319496	0.576215	-1.51347	-1.67451	4.91662	1.29656	-0.12781	-1.3348	5.3523	FALSE	no hit
CCT6A	908	-3.93718	-3.5554	-4.64941	-3.60673	-2.21983	-1.5647	-3.00032	-2.09447	-2.85682	-2.26909	-5.29602	-1.00534	0.667939	0.288869	-0.963067	2.67801	TRUE	<-3 in 3 replicates
CD19	930	0.694472	-0.887413	1.57957	1.39125	0.808334	0.0820327	2.02347	0.319496	-0.982855	-1.44974	-3.26945	1.77063	-1.09449	-0.718492	-3.20787	0.642886	FALSE	no hit
CD24	100133941	0.637549	-1.22908	2.01222	1.12951	1.14141	0.0334207	3.67481	-0.283996	-0.325014	-1.47308	-2.08759	2.58562	-0.543315	-0.529725	-2.63387	1.53365	FALSE	no hit
C1orf54	79630	-0.624557	-0.0449934	-0.610928	-1.21775	-2.17483	-1.4857	-3.32594	-1.71285	0.0209136	0.528237	-0.518992	0.0534955	0.689375	0.856974	-0.122969	1.33412	FALSE	no hit
C5	727	-0.783159	-0.853116	-0.71062	-0.78574	-0.134484	-0.74437	1.13966	-0.798739	-0.873374	-0.082828	-0.848329	-1.68897	-0.0650697	0.787877	-0.313292	-0.669794	FALSE	no hit
C9	735	1.43978	0.761238	1.02937	2.52872	0.52227	0.00911474	1.25595	0.301746	-0.196327	0.214132	-0.781563	-0.0215491	-1.09614	-0.0527682	-1.37879	-1.85685	FALSE	no hit
CA5B	11238	0.259717	-0.791996	1.03817	0.532974	0.549481	-0.148874	1.25595	0.541368	-1.15561	-0.469936	-0.923388	-2.07352	-1.09721	0.289759	-1.41379	-2.16761	FALSE	no hit
CACNA1F	778	1.09792	-0.29104	1.69014	1.89467	0.136367	-0.750447	1.18617	-0.0266246	-0.682489	-0.820628	-0.520503	-0.706336	-1.25447	-0.428809	-1.48451	-1.85009	FALSE	no hit
CACNG2	10369	0.530183	-0.861322	0.91997	1.5319	-0.346873	-0.574229	0.2791	-0.74549	-1.11975	-0.830026	-0.835641	-1.69359	-1.29154	-0.0712656	-1.24245	-2.56091	FALSE	no hit
CADPS2	93664	0.613046	-0.765349	1.61386	0.990625	0.945818	-0.118492	2.32583	0.630116	-1.7198	-1.39325	-1.14413	-2.62201	-1.86609	-0.73629	-1.9421	-2.91987	FALSE	no hit
CALR3	125972	1.2838	-0.582444	2.19253	2.2413	0.506009	-0.100262	1.51179	0.106499	-1.04325	-0.867336	-1.51343	-0.748977	-1.65233	-0.233838	-2.48071	-2.24244	FALSE	no hit
CAMLG	819	0.358992	-1.38841	1.38777	1.07762	-0.25503	-0.799059	0.255841	-0.221872	-1.82733	-1.13691	-1.89624	-2.44886	-1.68873	-0.0210624	-2.27903	-2.7661	FALSE	no hit
CAPN2	824	-0.746679	-2.51364	0.00380333	0.269802	-1.21445	-1.33987	-1.74437	-0.559117	-2.44657	-2.12053	-2.24272	-2.97646	-1.61285	-0.411578	-1.73828	-2.6887	FALSE	no hit
CARD17	440068	1.72378	-0.405141	2.76107	2.81542	0.216165	-0.592458	0.255841	0.985112	-1.19808	-1.0202	-2.62398	0.0499235	-1.98919	-0.541396	-3.40301	-2.02315	FALSE	no hit
CASP3	836	0.857709	-0.888332	2.47226	0.989193	1.27269	-0.130645	3.74459	0.204122	-1.50598	-1.14656	-2.11716	-1.25421	-1.68875	-0.396085	-2.96009	-1.71006	FALSE	no hit
CATSPER3	347732	-0.172192	-2.17204	0.272758	1.38271	1.5713	-0.270404	2.72122	2.26309	-2.33244	-1.48219	-3.56075	-1.95438	-1.73646	0.0887289	-2.77358	-2.52452	FALSE	no hit
CCBE1	147372	1.02223	-0.291874	1.63382	1.72474	1.19176	0.221792	2.76774	0.585742	-1.12014	-0.816281	-1.93106	-0.613093	-1.51863	-0.455036	-2.41202	-1.68884	FALSE	no hit
CCKBR	887	-0.185559	-0.71709	0.16918	-0.00876693	0.315896	-0.325092	0.465166	0.807614	-3.31718	-1.75612	-4.69682	-3.49858	-2.58578	-1.1438	-3.57144	-3.04209	FALSE	no hit
CCL23	6368	-0.396601	-0.82742	0.632113	-0.994496	0.525275	-0.136721	1.53505	0.177498	-2.45416	-1.48814	-2.47837	-3.39595	-1.63617	-0.74843	-2.21243	-1.94764	FALSE	no hit
CCNB1	891	-0.68459	-2.5831	-0.0734242	0.602758	-1.88265	-1.28518	-2.90729	-1.45548	-1.79577	-1.78196	-4.35534	0.749992	-0.934108	0.0240867	-3.09865	0.272236	FALSE	no hit
CCR3	1232	0.479604	-1.01613	2.49405	-0.0391085	1.29403	0.154951	2.88403	0.843113	-0.551323	-1.42186	-1.93567	1.70355	-0.609013	-0.641922	-2.90216	1.71704	FALSE	no hit
CCT7	10574	-0.151481	-2.43719	2.1044	-0.121647	-0.79157	-0.981354	-0.674491	-0.718865	-1.12889	-1.76824	-2.66578	1.04734	-0.621004	-0.040142	-3.13543	1.31256	FALSE	no hit
CD1A	909	0.770936	-1.10645	2.89963	0.519628	-0.500935	-0.689682	-0.0232583	-0.789864	-1.0164	-1.3555	-2.45496	0.761264	-1.12497	-0.501107	-3.33425	0.460456	FALSE	no hit
CD244	51744	-1.2305	-2.85413	-1.27199	0.434626	-0.114332	-0.64107	0.883815	-0.585742	-0.932064	-1.95853	-2.10301	1.26535	0.06603	0.1066	-0.874702	0.966191	TRUE	no hit
C1orf68	100129271	0.196919	0.162102	0.421987	0.00666821	-0.97472	-0.373704	-2.00021	-0.550242	0.320743	0.657716	0.00953977	0.294972	0.329067	0.874307	-0.534283	0.647177	FALSE	no hit
C5AR1	728	1.36819	-0.241265	1.24434	3.10148	-0.0203744	-0.264327	-0.116292	0.319496	0.855332	-0.119196	0.680859	2.00433	-0.199364	0.251019	-0.45315	-0.39596	FALSE	no hit
C9orf142	286257	0.839913	-0.677433	0.954595	2.24258	-0.222376	-0.634994	-0.0232583	-0.00887488	0.019837	-0.353999	0.100206	0.313304	-0.506526	0.330866	-0.65378	-1.19666	FALSE	no hit
CA6	765	0.326898	-0.469409	-0.122194	1.5723	-0.051482	0.154951	-0.0697749	-0.239622	-0.905129	-0.360006	-1.34223	-1.01315	-0.963734	0.164499	-1.06633	-1.98937	FALSE	no hit
CACNA1G	8913	0.397709	-0.509324	-0.504506	2.20696	-0.425653	-0.604611	0.0465166	-0.718865	-1.04351	-0.775329	-1.51057	-0.844642	-1.11874	-0.239148	-0.85389	-2.26318	FALSE	no hit
CACNG3	10368	0.549627	-0.712977	0.357633	2.00422	-0.0344289	-0.653223	0.186066	0.36387	-0.808485	-0.886686	-1.15935	-0.379423	-1.04095	-0.176683	-1.22462	-1.72154	FALSE	no hit
CALB1	793	0.428946	-0.426724	0.445532	1.26803	-0.458275	-0.233945	-0.395391	-0.74549	-1.03958	-0.587517	-1.47976	-1.05145	-1.08353	-0.0591612	-1.48027	-1.71115	FALSE	no hit
CALU	813	0.921981	-0.942241	2.52729	1.1809	-0.490444	-0.598535	-0.162808	-0.70999	-1.0243	-0.774018	-0.92154	-1.37733	-1.36082	0.0701413	-2.21144	-1.94115	FALSE	no hit
CAMP	820	-0.34337	-0.499298	-0.617227	0.0864138	-0.342549	-1.05427	0	0.0266246	-2.05602	-1.00483	-2.8796	-2.28362	-1.3811	-0.419031	-1.79382	-1.93044	FALSE	no hit
CAPN3	825	0.374677	-0.470301	0.644423	0.94991	-0.107221	-0.628917	0.0232583	0.283996	-1.36828	-0.909954	-2.06569	-1.1292	-1.29358	-0.395476	-1.96921	-1.51605	FALSE	no hit
CARD18	59082	2.54853	4.75357	1.7814	1.11061	-0.710076	-1.77737	0.0465166	-0.39937	0.644316	3.05699	-0.794173	-0.329872	-0.847629	0.225477	-1.79088	-0.977483	FALSE	no hit
CASP4	837	-0.376395	-1.73043	-0.750118	1.35136	-0.73055	-0.440546	-1.69786	-0.0532493	-1.51123	-1.07138	-2.98612	-0.47618	-0.934751	0.268085	-1.85073	-1.22161	FALSE	no hit
CATSPER4	378807	0.667235	-0.38756	-0.81655	3.20581	-0.658793	-0.458775	-0.674491	-0.843113	-1.40158	-0.779048	-4.0634	0.637712	-1.5663	-0.340999	-2.55422	-1.80368	FALSE	no hit
CCDC105	126402	0.653947	-0.9096	1.17046	1.70098	0.421859	-0.483081	1.16292	0.585742	-1.13118	-1.12899	-2.58711	0.322567	-1.27458	-0.380489	-2.59261	-0.850644	FALSE	no hit
CCL1	6346	0.989532	-0.414799	1.76633	1.61707	-1.19366	-1.03604	-1.30246	-1.24248	-1.09652	-0.961906	-1.53475	-0.792909	-1.37437	-0.435735	-1.98832	-1.69906	FALSE	no hit
CCL24	6369	0.735187	-0.186038	0.79403	1.59757	0.0957682	-0.792982	1.48853	-0.408244	-1.26905	-0.678254	-2.03654	-1.09235	-1.43075	-0.258186	-2.0123	-2.02178	FALSE	no hit
CCNB2	9133	0.766691	-1.9923	2.52518	1.76719	0.00137392	-0.525617	0.325616	0.204122	-0.532762	-1.77774	-2.35209	2.53155	-0.853803	-0.383368	-3.15418	0.976136	FALSE	no hit
CCR4	1233	0.855801	-1.41477	1.74134	2.24084	0.237982	-0.671453	1.46527	-0.0798739	-0.311939	-1.16609	-2.56593	2.79621	-0.696338	-0.0724452	-2.84207	0.825504	FALSE	no hit
CCT8	10694	0.85786	-1.78708	2.5262	1.83446	-0.31028	-0.604611	0.0465166	-0.372745	-0.228297	-1.23041	-2.16862	2.71414	-0.596145	0.134184	-2.97688	1.05426	FALSE	no hit
CD1B	910	0.624307	-1.16962	2.6779	0.364635	-1.00579	-0.938818	-1.58156	-0.496993	-0.436422	-1.24422	-2.22614	2.16109	-0.567598	-0.28242	-3.14796	1.72758	FALSE	no hit
CD247	919	1.19463	-1.27691	2.73297	2.12784	-1.74738	-1.45532	-2.34909	-1.43773	0.701519	-1.24988	-1.2976	4.65203	-0.0479503	-0.154613	-2.55895	2.56971	FALSE	no hit
CD248	57124	-0.361162	-0.459288	-0.699528	0.0753321	-1.67012	-5.12376	0.293257	-0.179864	-1.01864	-0.704328	-0.168393	-2.1832	0.23664	1.07426	0.261038	-0.625373	TRUE	no hit
CD320	51293	-0.282753	-0.65458	-0.258626	0.0649476	-1.7017	-5.1711	0.234605	-0.168623	-0.859856	-0.955939	0.591636	-2.21526	0.28439	1.23796	0.25394	-0.638735	TRUE	no hit
CD47	961	0.11771	-0.237508	0.337219	0.253419	-2.31752	-5.81009	-0.777131	-0.365349	-0.764143	-1.4466	-0.530661	-0.315169	-1.68618	-2.79799	-1.84552	-0.415022	FALSE	no hit
CD70	970	0.212724	-0.238273	0.463413	0.413033	-1.08218	-4.01145	0.821119	-0.0562076	-0.437247	-1.14562	0.216047	-0.382164	-1.15049	-1.40653	-1.4988	-0.546134	FALSE	no hit
CD93	22918	-0.603757	-1.13058	-0.144366	-0.536323	-3.35115	-7.94006	-1.01174	-1.10167	-1.95351	-1.75388	-1.09116	-3.0155	-0.388851	0.490448	-1.44876	-0.208242	FALSE	no hit
CDC42BPG	55561	-0.345779	-0.730758	-0.224225	-0.0823535	-1.77378	-5.19476	0.131966	-0.258555	-1.37957	-1.2701	-1.35021	-1.5184	-0.555569	0.198308	-1.55044	-0.314571	FALSE	no hit
CDH3	1001	-0.202309	-0.808614	0.363612	-0.161924	-2.19969	-6.78041	0.439885	-0.258555	-1.8054	-1.62841	-1.77351	-2.01429	-1.29717	-0.610447	-2.88567	-0.395387	FALSE	no hit
CDK15	65061	1.90232	5.60488	0.240382	-0.138308	-1.57454	-5.92842	0.923759	0.281038	0.688457	7.23923	-2.01479	-3.15908	-0.0574848	3.5027	-3.00701	-0.668137	FALSE	no hit
CDK8	1024	-0.595464	-1.36617	-0.287513	-0.132706	-2.31837	-5.90475	-0.454548	-0.5958	-2.23499	-2.12277	-2.9013	-1.6809	-0.991204	0.127213	-2.84012	-0.260699	FALSE	no hit
CEACAM1	634	-0.331105	-1.34074	0.43487	-0.0874448	-1.20247	-3.75112	-0.0586514	0.202347	-1.53058	-1.63067	-1.39717	-1.56391	-0.314753	2.1054	-2.7255	-0.324161	FALSE	no hit
CELA3B	23436	-1.08834	-1.9063	-0.536254	-0.822459	-2.64795	-7.4194	-0.175954	-0.348487	-2.42136	-2.34318	-1.82597	-3.09494	0.295812	2.14119	-1.3584	0.104643	TRUE	no hit
CER1	9350	-0.779446	-1.33941	-0.690391	-0.308538	-1.84266	-4.36644	-1.09971	-0.0618283	-1.86147	-1.45548	-3.49764	-0.631283	0.0947937	2.53754	-2.40224	0.149085	TRUE	no hit
CFH	3075	-1.08415	-2.20151	-0.426657	-0.624298	-3.38836	-8.43705	-0.733142	-0.994874	-2.94324	-2.29376	-2.81502	-3.72093	0.389848	3.96693	-2.4916	-0.305789	TRUE	no hit
CHAD	1101	-0.498502	-1.5821	0.377768	-0.291176	-1.0899	-4.79243	1.5396	-0.0168623	-1.82051	-1.46664	-2.47798	-1.51691	0.0375796	3.80454	-3.59259	-0.0992159	TRUE	no hit
CHIC2	26511	-0.944095	-1.96279	-0.429697	-0.439798	-3.57817	-9.76237	-0.601177	-0.37097	-3.7827	-2.61896	-5.06295	-3.6662	-1.24811	0.904481	-4.15306	-0.495749	FALSE	no hit
CHMP5	51510	-1.06844	-2.17319	-0.613674	-0.418443	-4.17615	-9.64403	-1.97948	-0.904942	-2.70928	-2.43183	-3.93617	-1.75983	-0.0472402	2.97202	-3.05188	-0.0618596	FALSE	no hit
CHRNA3	1136	-1.20781	-2.45554	-0.256207	-0.911683	-4.0537	-10.7327	-0.219943	-1.20846	-3.32884	-2.48679	-3.78859	-3.71114	0.317623	4.20782	-3.30874	0.0537909	TRUE	no hit
CHST10	9486	-0.541305	-1.55062	0.430735	-0.504029	-1.18852	-5.28943	1.84752	-0.123657	-2.90052	-1.98	-2.93653	-3.78501	-1.12517	1.19159	-4.07111	-0.495999	FALSE	no hit
CHTF8	54921	-0.967009	-1.99073	0.0503903	-0.960687	-4.137	-10.9457	-0.498537	-0.96677	-2.87252	-1.92318	-2.45287	-4.24153	0.458907	4.13568	-2.74307	-0.0158896	TRUE	no hit
CKMT2	1160	-0.771549	-2.1212	0.354749	-0.548194	-2.72514	-8.08206	0.322583	-0.415936	-2.36814	-1.09109	-3.34518	-2.66816	2.50265	11.8994	-4.25544	-0.136047	TRUE	no hit
CLCN7	1186	-0.588734	-1.82308	0.383905	-0.327027	-0.824279	-6.40175	3.37245	0.556455	-1.20231	-1.6894	-0.297206	-1.62033	0.737746	4.0907	-1.73891	-0.138555	TRUE	no hit
CD27	939	0.0400797	-0.0937936	-0.399375	0.613408	-1.60775	-4.31911	-0.498537	-0.00562076	-0.342267	-0.624026	-0.29159	-0.111184	-0.288492	0.0581486	-0.268511	-0.655115	FALSE	no hit
CD33	945	0.0542905	-0.68803	-0.288916	1.13982	1.28938	0.177498	3.04987	0.640766	0.187818	-1.86008	0.00272546	2.42081	-1.45201	-3.3255	-0.447848	-0.582679	FALSE	no hit
CD48	962	-0.38843	-0.698034	-0.163221	-0.304034	-1.99986	-5.00543	-0.454548	-0.539593	-1.40972	-1.57834	-1.50187	-1.14894	-1.12587	-1.37147	-1.98538	-0.0207448	FALSE	no hit
CD72	971	-0.0445838	-0.304365	0.0275279	0.143086	-0.34856	-2.6388	1.40763	0.185485	-1.39294	-1.46859	-1.4346	-1.27563	-1.79485	-2.74049	-2.12409	-0.519968	FALSE	no hit
CD96	10225	0.259615	-0.416361	0.853694	0.341513	-1.17776	-3.96411	0.0879771	0.342866	-0.750027	-1.39812	-0.569556	-0.28241	-1.71002	-1.82686	-2.8424	-0.460783	FALSE	no hit
CDC42SE2	56990	0.0325114	-0.643545	0.314646	0.426433	-0.818512	-3.37245	0.894433	0.022483	-1.7579	-1.45482	-2.71362	-1.10527	-1.89906	-1.04596	-3.90155	-0.749674	FALSE	no hit
CDH4	1002	-0.36295	-0.764979	-0.0605478	-0.263323	-0.681479	-4.15344	2.0528	0.0562076	-2.55227	-2.18414	-1.98106	-3.49163	-2.2008	-3.46549	-2.50876	-0.628143	FALSE	no hit
CDK16	5127	0.517884	-0.899077	2.51457	-0.0618411	-0.473541	-3.79845	2.09679	0.281038	-0.500743	-1.53983	2.1078	-2.0702	-1.28449	-0.0487811	-3.34835	-0.456333	FALSE	no hit
CDK9	1025	-0.419818	-1.02867	0.060637	-0.291425	-0.72693	-3.56178	1.51027	-0.129277	-2.80854	-1.88116	-3.22822	-3.31624	-1.74778	-0.929622	-3.78311	-0.530622	FALSE	no hit
CEACAM16	388551	-0.120585	-1.41385	1.10743	-0.0553383	-2.11863	-6.80407	0.909096	-0.460902	-2.53167	-2.5654	-2.71817	-2.31144	-2.4891	-1.83692	-5.06509	-0.56528	FALSE	no hit
CELSR1	9620	-0.281419	-1.12279	0.310648	-0.0321196	-0.0731599	-3.20679	2.49268	0.494627	-1.82402	-1.49731	-1.14852	-2.82623	-0.76783	0.948137	-2.53481	-0.71682	FALSE	no hit
CES1	1066	-1.21714	-1.77997	-1.57264	-0.298812	-3.28181	-8.12939	-0.850445	-0.865596	-3.55959	-2.20485	-5.47114	-3.00279	-0.49629	1.58787	-2.62635	-0.450385	FALSE	no hit
CFHR2	3080	0.0442615	-1.08066	1.09736	0.116087	-0.347625	-4.50844	3.3138	0.15176	-1.38482	-1.56253	-1.41338	-1.17855	-1.1526	0.85486	-3.86714	-0.445517	FALSE	no hit
CHADL	150356	-0.228388	-1.04431	0.547637	-0.188487	-0.576653	-4.12978	2.2874	0.112415	-2.32563	-1.49839	-2.73725	-2.74125	-1.25299	0.705371	-3.94676	-0.517593	FALSE	no hit
CHID1	66005	-0.0736168	-1.15088	0.755253	0.174776	0.468186	-1.33715	1.99415	0.747561	-2.04994	-1.45609	-3.40469	-1.28905	-1.43351	1.17973	-4.89184	-0.588413	FALSE	no hit
CHMP6	79643	-1.46279	-2.37373	-1.07161	-0.943034	-3.27414	-7.70339	-1.34898	-0.770044	-4.29599	-2.54111	-5.70695	-4.63991	-0.180093	3.40048	-3.70476	-0.235999	FALSE	no hit
CHRNA4	1137	-0.205179	-0.914839	0.80657	-0.507269	-0.100621	-3.49079	2.94723	0.241693	-3.08809	-1.37283	-3.82175	-4.0697	-1.85155	0.37584	-5.36839	-0.562101	FALSE	no hit
CHST11	50515	-1.19629	-2.55569	-0.353212	-0.679978	-2.0758	-6.61474	0.527862	-0.140519	-3.66378	-2.6242	-3.99319	-4.37396	-0.0736407	3.73581	-3.54909	-0.407644	FALSE	no hit
CHUK	1147	-1.65559	-2.34335	-1.74655	-0.876867	-3.08089	-8.20039	-0.733142	-0.309142	-3.20744	-2.3127	-5.69133	-1.61829	0.86682	4.15697	-2.66947	1.11295	TRUE	no hit
CKS1B	1163	-1.83196	-2.87904	-1.31364	-1.3032	-5.89956	-14.2353	-1.64224	-1.82113	-4.23198	-2.9538	-4.53945	-5.20269	0.753009	4.77247	-2.49396	-0.0194841	TRUE	no hit
CLCNKA	1187	-1.68792	-2.58499	-1.80105	-0.677717	-5.08503	-11.3953	-2.52201	-1.33774	-3.74854	-2.22263	-6.63879	-2.38419	1.0714	6.11808	-3.01869	0.114805	TRUE	no hit
CD274	29126	-0.580869	-1.09614	-0.821424	0.174953	-5.15973	-9.90436	-3.41644	-2.15837	-1.05993	-1.44584	-0.847685	-0.886279	0.410087	1.50341	-0.0450442	-0.228105	TRUE	toxic
CD34	947	0.105298	-0.426432	0.173318	0.569009	-1.20642	-4.43744	0.615839	0.202347	-0.48165	-0.980961	-0.574101	0.110113	-0.677426	0.0914868	-1.53085	-0.592919	FALSE	no hit
CD5	921	0.263093	-0.500392	0.810551	0.479119	-0.629327	-3.13579	1.68623	-0.438419	0.0564398	-0.76594	0.79299	0.14227	-0.386346	1.17956	-1.8411	-0.497493	FALSE	no hit
CD74	972	-0.144545	-0.387426	0.291073	-0.337282	-0.227128	-2.59146	2.06746	-0.157381	-1.71305	-1.29075	-0.808319	-3.04007	-1.42709	-1.66449	-2.13722	-0.479564	FALSE	no hit
CD99L2	83692	-0.92587	-1.16775	-1.40029	-0.209574	-3.59899	-8.93404	-1.07039	-0.792527	-2.41962	-1.78523	-4.16261	-1.31102	-0.565079	0.34764	-1.89473	-0.148143	FALSE	no hit
CDC7	8317	-0.0865698	-0.877228	0.632657	-0.0151389	-0.399485	-3.51445	1.75954	0.556455	-1.05332	-1.47926	-0.745312	-0.935372	-0.970694	0.0315497	-2.61479	-0.328839	FALSE	no hit
CDH5	1003	0.0868459	-0.54002	0.904758	-0.1042	-1.35733	-4.79243	0.967748	-0.247313	-1.81418	-1.48719	-1.7679	-2.18745	-2.05383	-1.76798	-3.93765	-0.455867	FALSE	no hit
CDK17	5128	0.16831	-0.87961	1.70907	-0.324528	0.709926	-1.57381	3.22583	0.477764	-1.54028	-1.81137	-0.650345	-2.15913	-2.02072	-1.53065	-4.25264	-0.278872	FALSE	no hit
CDKL1	8814	0.768483	-0.132206	2.20099	0.236661	0.44067	-1.66848	2.43403	0.556455	-1.01584	-1.05701	0.520525	-2.51102	-2.45935	-2.18006	-4.29753	-0.900468	FALSE	no hit
CEACAM3	1084	0.165897	-0.821908	1.03782	0.281776	0.0248239	-2.73346	2.30207	0.505868	-1.71483	-1.80731	-1.5879	-1.74928	-2.14237	-1.71701	-3.94716	-0.762955	FALSE	no hit
CELSR2	1952	-0.592836	-1.66944	0.346643	-0.455711	-1.23134	-5.19476	1.34898	0.15176	-3.05546	-2.06658	-2.94946	-4.15033	-0.818901	2.1851	-3.98745	-0.654354	FALSE	no hit
CES2	8824	-0.450219	-1.54419	0.14088	0.0526517	-1.39432	-5.07643	1.61291	-0.719457	-2.59006	-2.07632	-3.51233	-2.18152	-1.29612	0.914168	-4.13858	-0.663953	FALSE	no hit
CFHR3	10878	-0.584589	-1.74236	0.368449	-0.379854	-0.873202	-5.26576	2.66864	-0.022483	-2.98974	-2.12519	-2.80549	-4.03854	-1.07135	1.36974	-3.90001	-0.683795	FALSE	no hit
CHAT	1103	-0.166244	-1.3092	1.04166	-0.231189	0.210107	-2.66246	2.74195	0.550834	-2.36567	-1.57451	-2.58181	-2.9407	-1.21184	1.64369	-4.7342	-0.545015	FALSE	no hit
CHIT1	1118	-0.519721	-1.76868	0.671561	-0.46204	-1.66873	-5.59709	0.894433	-0.303521	-2.83297	-2.01686	-4.40941	-2.07262	-1.21337	2.10618	-5.66333	-0.0829545	FALSE	no hit
CHP1	11261	0.0991857	-1.27697	1.49	0.0845359	-0.472084	-3.18312	1.59825	0.168623	-1.47664	-1.72395	-1.69945	-1.00654	-1.42405	0.931546	-4.74632	-0.457389	FALSE	no hit
CHRNA5	1138	-0.239817	-1.52154	0.520524	0.281563	0.752174	-2.5678	4.2229	0.601421	-1.77868	-1.72213	-3.47436	-0.139558	-0.894388	2.44454	-4.73507	-0.392636	FALSE	no hit
CHST12	55501	-0.530924	-1.61048	0.326788	-0.309078	0.207046	-1.52648	1.83286	0.314762	-3.49909	-2.09512	-4.81417	-3.58799	-1.70463	0.982859	-5.43678	-0.659966	FALSE	no hit
CHURC1-FNTB	100529261	-0.576576	-2.16593	0.796794	-0.360596	-1.00554	-5.47876	2.77128	-0.309142	-2.97759	-2.45377	-3.76833	-2.71068	-1.19778	2.12076	-5.36996	-0.34415	FALSE	no hit
CLASP1	23332	-0.298632	-1.49043	0.395705	0.198827	-0.984023	-5.50242	2.25808	0.292279	-1.9239	-1.87827	-3.61817	-0.27526	-1.22813	1.19985	-4.55324	-0.330999	FALSE	no hit
CLCNKB	1188	-1.15981	-2.4001	-0.730184	-0.349155	-3.09149	-9.3837	0.733142	-0.623904	-3.45994	-2.69461	-4.76662	-2.91859	-0.41837	2.79008	-3.62449	-0.420698	FALSE	no hit
CD276	80381	0.670535	0.149528	1.3917	0.470376	-0.502618	-2.30747	0.439885	0.359728	2.06332	-0.238001	3.19526	3.23269	-0.00735963	0.375383	-0.675473	0.278012	FALSE	no hit
CD36	948	-0.207641	-0.81661	0.235596	-0.0419092	-0.7892	-4.24811	1.62758	0.252934	-0.559902	-1.05159	-0.51751	-0.110609	-0.0310371	1.78949	-1.81576	-0.0668427	FALSE	no hit
CD52	1043	-0.0743323	0.0795214	0.117206	-0.419725	-0.663386	-3.41979	1.9355	-0.505868	-1.00513	-0.682406	-0.882156	-1.45083	-1.06825	-1.27984	-1.95108	0.0261631	FALSE	no hit
CD79A	973	0.61422	0.0428044	1.84792	-0.0480677	1.11987	0.153831	2.94723	0.258555	-0.517347	-1.0648	0.544151	-1.0314	-2.21552	-2.71226	-3.62664	-0.307662	FALSE	no hit
CDA	978	0.0889959	-0.471787	0.327481	0.411294	1.79594	1.00582	3.38712	0.994874	-0.109562	-0.556982	-0.895684	1.12398	-0.37628	1.36426	-2.25571	-0.237391	FALSE	no hit
CDCA8	55143	-0.663011	-1.34203	0.0148484	-0.661852	-4.09198	-9.3837	-1.62758	-1.26467	-1.87335	-2.16193	-0.923576	-2.53454	-0.450056	-0.21933	-1.10174	-0.0290993	FALSE	no hit
CDH6	1004	-0.0961239	-1.17099	0.548461	0.334158	-0.641229	-3.41979	1.64224	-0.14614	-1.63142	-1.96917	-1.99268	-0.9324	-1.48868	-0.490068	-3.37455	-0.60142	FALSE	no hit
CDK18	5129	-0.019638	-0.752136	0.420766	0.272457	0.115202	-2.80446	2.41937	0.730698	-1.64129	-1.68359	-2.27771	-0.962576	-1.90736	-1.53048	-3.6376	-0.553988	FALSE	no hit
CDKL2	8999	-0.0457397	-0.867948	0.51101	0.219719	0.225345	-2.52047	2.85925	0.337245	-1.84482	-1.86607	-1.99607	-1.67232	-1.96995	-1.75238	-3.52408	-0.633393	FALSE	no hit
CEACAM5	1048	0.202157	-0.796962	1.10698	0.296456	1.2903	-0.911154	4.01762	0.764423	-1.3149	-1.59682	-0.905311	-1.44257	-1.76321	-1.02174	-3.56096	-0.706915	FALSE	no hit
CELSR3	1951	0.512976	-1.06516	1.98269	0.621396	1.3552	-0.579825	3.84166	0.803768	-0.497067	-1.56243	0.115892	-0.0446628	-1.5046	0.359212	-4.1447	-0.728322	FALSE	no hit
CES3	23491	-0.191052	-1.22149	0.314002	0.33433	-0.605361	-4.36644	2.59532	-0.0449661	-1.46571	-1.79809	-1.5489	-1.05013	-0.986068	0.438223	-2.73924	-0.657187	FALSE	no hit
CFHR4	10877	-0.22051	-1.48127	0.603324	0.216415	0.177172	-2.16547	2.40471	0.292279	-2.17714	-2.2761	-2.71593	-1.53939	-1.76163	-0.338654	-4.27356	-0.672668	FALSE	no hit
CHCHD3	54927	-0.00792196	-1.56447	1.74594	-0.205231	0.167495	-2.04714	2.03814	0.511489	-1.7229	-2.03536	-1.25928	-1.87406	-1.32391	1.19278	-4.82988	-0.334623	FALSE	no hit
CHKA	1119	-0.507107	-1.87997	0.637797	-0.279151	-2.58726	-6.66208	-0.425222	-0.674491	-3.01021	-2.03241	-4.17353	-2.82469	-0.997578	3.00294	-5.51324	-0.482427	FALSE	no hit
CHRD	8646	-0.293186	-1.44901	0.656016	-0.0865642	-0.372805	-3.89311	2.78594	-0.0112415	-2.60691	-1.84104	-3.42703	-2.55266	-1.41628	1.34294	-4.99071	-0.601062	FALSE	no hit
CHRNA6	8973	-0.468905	-1.62452	0.460158	-0.242352	0.467483	-2.1418	2.97656	0.567696	-2.92535	-1.88294	-4.01446	-2.87866	-1.2509	1.93361	-5.11013	-0.576179	FALSE	no hit
CHST13	166012	0.0818351	-1.45498	1.71803	-0.0175503	0.318034	-3.39612	3.29914	1.05108	-1.8996	-1.53944	-2.20167	-1.9577	-1.20152	2.46865	-5.53234	-0.540884	FALSE	no hit
CIB1	10519	-0.829993	-2.19984	0.637183	-0.927326	-1.93138	-7.3484	1.89151	-0.337245	-3.8275	-2.68575	-3.4931	-5.30364	-1.27907	1.42538	-4.8295	-0.433085	FALSE	no hit
CLC	1178	-0.24649	-1.30456	0.656189	-0.0910944	0.605292	-2.40213	3.76835	0.449661	-2.07776	-1.47396	-3.82914	-0.930167	-1.14569	1.94009	-5.18351	-0.19364	FALSE	no hit
CLDN11	5010	-0.605129	-1.56236	0.0987571	-0.351785	0.127061	-3.94045	4.16425	0.157381	-2.8305	-1.57325	-4.43635	-2.48191	-0.678523	2.92964	-4.68577	-0.279439	FALSE	no hit
CD28	940	0.786585	0.0897465	1.51237	0.757643	1.25005	-0.153831	2.97656	0.927425	1.6784	-0.0587077	2.04606	3.04786	-0.419208	0.91988	-2.04743	-0.130071	FALSE	no hit
CD37	951	-0.518244	-0.608206	-0.53058	-0.415945	-2.7245	-6.70941	-0.806456	-0.657628	-1.46249	-0.959204	-1.15455	-2.27372	0.101491	1.1765	-0.656838	-0.215189	TRUE	no hit
CD53	963	-0.189351	-0.558343	0.00474328	-0.0144527	-1.1819	-4.12978	0.527862	0.0562076	-0.82999	-1.36756	-0.513448	-0.608958	-0.756437	-0.752085	-1.26904	-0.248188	FALSE	no hit
CD79B	974	-0.262488	-0.342003	-0.442995	-0.00246736	1.01202	-1.19515	3.68037	0.550834	-1.02573	-1.09609	-1.6108	-0.370287	-1.00631	-1.24188	-1.5914	-0.185639	FALSE	no hit
CDAN1	146059	-0.20329	-0.703989	-0.00210902	0.096228	0.933354	0.556159	2.0528	0.191106	-1.38904	-1.35066	-2.02638	-0.790085	-1.11995	-0.358004	-2.65986	-0.341993	FALSE	no hit
CDCP1	64866	0.517357	-0.61299	1.90233	0.262734	0.988786	-0.863821	3.09386	0.736319	-0.0368108	-1.21421	1.7015	-0.597727	-1.08742	-0.20956	-2.54567	-0.507014	FALSE	no hit
CDH8	1006	0.0334554	-0.4737	0.479205	0.0948609	0.525959	-2.11814	2.97656	0.719457	-1.51298	-1.36539	-1.46808	-1.70548	-1.76312	-1.70536	-2.98309	-0.600911	FALSE	no hit
CDK19	23097	0.413428	-1.02997	1.86768	0.402568	1.77008	-0.887488	5.14666	1.05108	-0.907175	-1.74211	0.0683276	-1.04774	-1.80835	-0.455155	-4.22609	-0.743816	FALSE	no hit
CDKL3	51265	0.303672	-1.11804	1.72104	0.308013	0.779562	-1.55015	3.15251	0.736319	-0.502155	-1.81373	0.0938557	0.213407	-1.38597	-0.194022	-3.63635	-0.327536	FALSE	no hit
CEACAM6	4680	-0.867284	-1.98786	-0.135313	-0.478677	-2.48005	-7.2774	0.0733142	-0.236072	-3.02649	-2.32041	-2.93386	-3.82518	-0.376752	2.42316	-3.04103	-0.512386	FALSE	no hit
CEMIP	57214	-0.294931	-1.06295	-0.0346085	0.21276	0.104192	-2.7808	2.60999	0.483385	-2.23116	-1.59576	-3.08185	-2.01589	-1.32639	0.299219	-3.52016	-0.758235	FALSE	no hit
CES4A	283848	-0.313603	-1.27467	0.201678	0.132186	0.696922	-2.37847	3.25515	1.21408	-2.43362	-1.92635	-3.20327	-2.17126	-1.57303	-0.0124988	-3.95576	-0.750826	FALSE	no hit
CFHR5	81494	-0.578747	-1.25593	0.0566591	-0.536967	0.162582	-3.34879	2.97656	0.859976	-3.43446	-1.83461	-4.03352	-4.43524	-1.58834	0.272788	-4.42768	-0.610126	FALSE	no hit
CHD1	1105	-0.317546	-1.77268	0.720945	0.0990945	0.41895	-2.47313	3.04987	0.680112	-2.73156	-1.97326	-3.14475	-3.07667	-1.17238	2.18925	-4.80339	-0.902992	FALSE	no hit
CHKB	1120	-0.310594	-1.69147	0.318177	0.441512	0.928732	-2.33113	4.1056	1.01174	-2.04215	-2.09498	-3.16703	-0.864436	-1.17044	1.31656	-4.12418	-0.70369	FALSE	no hit
CHRDL1	91851	-0.175061	-1.56272	1.12831	-0.0907773	0.0600148	-2.73346	2.60999	0.303521	-2.07123	-1.70792	-2.16721	-2.33857	-0.970799	2.35479	-4.68616	-0.581026	FALSE	no hit
CHRNA7	1139	-0.472056	-2.25123	1.0194	-0.184343	-0.569158	-5.0291	2.96189	0.359728	-3.00404	-2.46672	-2.74479	-3.80063	-1.00449	2.7153	-4.92419	-0.804578	FALSE	no hit
CHST14	113189	-0.417203	-2.06468	0.871308	-0.058235	-1.44107	-5.1001	1.04106	-0.264176	-2.17218	-2.21106	-2.71983	-1.58564	-0.49648	2.70329	-3.77766	-0.415068	FALSE	no hit
CIB2	10518	-0.0392835	-1.66575	1.26574	0.282162	0.0889975	-4.65044	4.16425	0.753181	-2.09453	-1.62053	-3.34667	-1.31639	-1.02453	3.29031	-5.70355	-0.660346	FALSE	no hit
CLCA1	1179	0.0536709	-1.45394	1.68568	-0.0707331	0.493966	-3.20679	4.3402	0.348487	-1.79024	-0.906297	-2.12322	-2.34121	-0.299535	5.15218	-5.46335	-0.587436	FALSE	no hit
CLDN18	51208	-0.874321	-2.06115	0.0382423	-0.60005	-1.7942	-6.75674	1.48095	-0.106794	-3.04581	-1.51061	-5.16636	-2.46048	0.248259	5.98053	-5.21912	-0.0166306	TRUE	no hit
CD2AP	23607	0.488363	0.607074	0.655609	0.202408	0.389363	-2.1418	2.81527	0.494627	1.26111	0.0807536	1.27654	2.42605	-0.409759	-0.488954	-0.991824	0.251501	FALSE	no hit
CD38	952	-0.183968	-0.606339	0.234156	-0.17972	-2.28946	-5.43143	-0.762468	-0.674491	0.0283621	-1.26306	0.550325	0.797822	-0.246556	-0.122547	-0.925753	0.308632	FALSE	no hit
CD55	1604	-0.162635	-0.437507	0.047409	-0.0978067	-1.25706	-3.13579	-0.0733142	-0.562076	-1.13134	-0.702481	-1.5981	-1.09346	-0.522144	1.04705	-2.39655	-0.216929	FALSE	no hit
CD80	941	0.198713	-0.289553	0.805927	0.079764	0.433428	-1.83414	2.44869	0.685732	-0.914456	-1.1959	-0.313734	-1.23373	-1.61528	-1.67217	-2.69814	-0.475517	FALSE	no hit
CDC14A	8556	0.295464	-0.75828	0.875111	0.769561	-1.14593	-5.12376	1.61291	0.0730698	-0.309088	-1.2564	-0.269871	0.59901	-0.916617	0.429716	-2.50553	-0.674036	FALSE	no hit
CDCP2	200008	0.0154449	-0.661056	0.71746	-0.0100691	0.567478	-2.0708	3.21116	0.562076	-1.50624	-1.20658	-1.75268	-1.55947	-1.32625	0.102891	-3.62674	-0.454894	FALSE	no hit
CDHR2	54825	-0.27793	-2.33491	1.15836	0.342752	1.57069	-0.627158	4.57481	0.764423	-0.0542946	1.77602	-0.503848	-1.43505	6.01505	22.136	-3.31651	-0.774357	TRUE	no hit
CDK2	1017	0.278069	-1.22326	1.82976	0.227708	-1.74259	-5.92842	1.09971	-0.399074	-1.5639	-1.98365	-0.456158	-2.25189	-1.908	-0.516888	-4.38751	-0.819594	FALSE	no hit
CDKL4	344387	-0.224841	-0.597935	0.250574	-0.327161	0.329841	-0.840155	1.89151	-0.0618283	-2.27114	-1.40604	-2.56382	-2.84355	-1.83938	-1.42599	-3.61916	-0.473006	FALSE	no hit
CEACAM7	1087	0.216631	-0.571478	0.813148	0.408225	1.03172	-1.76314	3.95897	0.899321	-1.71209	-1.33402	-2.39301	-1.40923	-1.83558	-0.382449	-4.31552	-0.808766	FALSE	no hit
CENPE	1062	-0.612699	-1.73823	0.235042	-0.334909	-3.74712	-9.4547	-0.791794	-0.994874	-2.59097	-1.83089	-2.48233	-3.4597	-0.233083	3.22964	-3.40865	-0.520241	FALSE	no hit
CES5A	221223	-0.074869	-0.900624	0.757383	-0.0813659	-1.47855	-5.38409	1.24634	-0.2979	-2.4803	-1.59013	-2.92168	-2.92909	-1.88163	-0.230672	-4.75123	-0.662995	FALSE	no hit
CFI	3426	0.520289	-1.09353	1.97553	0.678873	-0.12755	-3.70378	3.15251	0.168623	-1.49153	-2.07477	-1.00809	-1.39173	-2.54879	-1.51286	-5.11257	-1.02094	FALSE	no hit
CHD2	1106	0.217874	-1.24272	1.76277	0.13357	-1.15866	-4.03511	1.1437	-0.584559	-1.4389	-1.46602	-0.399802	-2.45088	-1.02775	1.77733	-4.11663	-0.74396	FALSE	no hit
CHL1	10752	0.305609	-1.22314	1.74962	0.390349	0.837634	-2.2838	3.35779	1.43891	-2.12888	-1.67073	-2.42074	-2.29516	-2.09832	0.579752	-5.80032	-1.0744	FALSE	no hit
CHRDL2	25884	0.141165	-0.925937	1.23876	0.110671	-0.749992	-4.7451	2.55133	-0.0562076	-1.43493	-1.17839	-1.86917	-1.25723	-1.17331	1.55448	-4.5582	-0.516198	FALSE	no hit
CHRNA9	55584	-0.0232017	-1.54462	1.28655	0.188471	-0.0200864	-3.58545	2.99122	0.533972	-2.30713	-1.54631	-2.94278	-2.43231	-1.12841	2.87872	-5.43514	-0.828815	FALSE	no hit
CHST2	9435	0.0322848	-1.73084	1.21322	0.614475	-1.06801	-4.7451	0.967748	0.573317	-1.90773	-1.32563	-3.41184	-0.985714	-0.600924	4.92388	-5.82794	-0.898704	FALSE	no hit
CIITA	4261	-0.2189	-1.75868	0.837503	0.26448	0.248582	-3.60912	3.68037	0.674491	-2.43883	-1.79961	-3.00934	-2.50754	-0.938482	2.93128	-4.8546	-0.892124	FALSE	no hit
CLCA2	9635	-0.86524	-2.2073	0.267867	-0.656287	-2.07216	-7.01707	1.40763	-0.607042	-2.33901	-1.64012	-1.77749	-3.59943	1.09215	6.41265	-2.88476	-0.251449	TRUE	no hit
CLDN2	9075	-0.0571368	-1.23317	1.41134	-0.349577	-0.280069	-3.65645	2.43403	0.382211	-1.17401	-0.828298	-1.54492	-1.14881	0.0999701	4.63423	-4.32845	-0.00586619	TRUE	no hit
CD300A	11314	-0.00849753	-0.164109	0.624287	-0.485671	-1.29031	-3.56178	0.337245	-0.646387	-0.147598	-0.595601	1.3788	-1.226	-0.0856534	0.240138	-0.674849	0.177751	FALSE	no hit
CD3D	915	0.226763	0.0338311	0.60532	0.0411387	-0.681586	-3.20679	0.909096	0.252934	-0.264767	-0.0404534	-0.148392	-0.605454	-0.458884	1.17569	-2.25693	-0.29541	FALSE	no hit
CD58	965	0.203528	-0.347155	0.545931	0.411807	-0.467295	-2.85179	1.27567	0.174243	-0.793793	-0.894609	-1.24317	-0.243604	-1.20958	-0.0383036	-3.03583	-0.554599	FALSE	no hit
CD81	975	0.312792	-0.512037	0.883369	0.567043	-0.586179	-3.98778	2.03814	0.191106	-0.917682	-1.65197	-0.865405	-0.235669	-2.15933	-2.60897	-3.18547	-0.683555	FALSE	no hit
CDC14B	8555	0.346021	-0.626139	1.1271	0.5371	1.10467	-0.958487	3.92964	0.342866	-0.645069	-0.938705	-1.14873	0.152224	-1.15945	0.897686	-3.81152	-0.564511	FALSE	no hit
CDH1	999	0.280815	-0.808223	1.01851	0.632153	-0.408913	-2.80446	1.51027	0.0674491	-0.971031	-0.988272	-1.47519	-0.449628	-1.01389	1.58551	-3.83455	-0.792639	FALSE	no hit
CDHR5	53841	0.270562	-0.718919	0.427191	1.10341	0.253491	-1.99981	2.1701	0.590179	-0.750229	-1.29185	-2.28008	1.32124	-1.47922	-0.00857961	-3.60152	-0.827544	FALSE	no hit
CDK20	23552	0.278014	-0.971602	1.415	0.390646	-0.607428	-3.56178	1.48095	0.258555	-1.31352	-1.67633	-1.22787	-1.03634	-1.87705	-0.647877	-4.25671	-0.726557	FALSE	no hit
CDKL5	6792	-0.280045	-1.20001	0.564694	-0.204818	-0.337018	-2.59146	1.64224	-0.0618283	-2.14671	-1.78934	-1.57714	-3.07364	-1.21836	0.382476	-3.40179	-0.635773	FALSE	no hit
CEACAM8	1088	0.558446	-0.571972	1.97715	0.270159	0.884264	-0.248497	2.65397	0.247313	-1.60835	-1.02065	-1.16266	-2.64173	-1.98442	0.251504	-5.20379	-1.00098	FALSE	no hit
CEP131	22994	0.662067	-0.239028	1.8516	0.373624	1.05509	-0.863821	3.75369	0.275417	-1.17777	-1.09036	-0.505464	-1.93748	-2.35762	-1.7531	-4.43643	-0.883333	FALSE	no hit
CETP	1071	0.607842	-0.929462	2.02967	0.723313	0.30052	-2.04714	2.37538	0.573317	-0.781555	-1.36743	-0.822902	-0.154332	-1.7207	0.631348	-4.99845	-0.795015	FALSE	no hit
CFL1	1072	0.216682	-1.12397	1.50338	0.270634	0.189721	-2.92279	2.8006	0.691353	-2.49933	-1.78386	-2.24841	-3.46571	-2.24956	-0.260026	-5.35513	-1.13353	FALSE	no hit
CHDH	55349	0.279052	-1.23793	1.53163	0.543451	0.135618	-1.55015	1.64224	0.314762	-1.50144	-1.33535	-1.46155	-1.70742	-1.23059	2.02091	-4.73784	-0.974841	FALSE	no hit
CHMP1A	5119	-0.428356	-2.11164	1.44049	-0.613919	-3.25797	-8.67371	-0.571851	-0.528351	-3.38765	-2.20105	-2.52294	-5.43898	-1.06343	2.96955	-5.35886	-0.800992	FALSE	no hit
CHRM1	1128	-0.698742	-2.04335	0.536404	-0.589276	-4.72092	-10.1647	-2.19943	-1.79864	-3.25844	-2.23477	-2.97986	-4.56071	-0.601286	2.84116	-4.09768	-0.547336	FALSE	no hit
CHRNB1	1140	0.252351	-1.20168	1.60111	0.357625	1.19061	-0.958487	3.7097	0.82063	-2.10228	-1.41324	-2.29475	-2.59883	-1.63329	1.59277	-5.46914	-1.0235	FALSE	no hit
CHST3	9469	-0.17343	-1.50109	0.835254	0.145544	1.29186	-2.73346	5.43991	1.16912	-2.91932	-1.81873	-4.43228	-2.50697	-1.82102	1.50058	-6.14636	-0.817291	FALSE	no hit
CILP	8483	0.0830768	-1.30629	1.45833	0.0971907	1.27195	-1.33715	4.35486	0.798147	-2.45089	-1.91959	-2.63456	-2.7985	-2.21297	-0.37605	-5.43325	-0.829599	FALSE	no hit
CLCA4	22802	-1.24458	-2.27764	-0.361346	-1.09475	-5.89703	-12.8863	-3.0792	-1.72557	-4.5453	-2.08029	-6.86615	-4.68947	-0.27019	4.94255	-5.73	-0.023122	FALSE	toxic
CLDN23	137075	-0.274149	-1.61325	1.15376	-0.362959	-0.259622	-3.65645	2.62465	0.252934	-1.84865	-1.88899	-2.02583	-1.63114	-0.822812	2.01625	-4.41963	-0.0650542	FALSE	no hit
CD300C	10871	0.610886	0.549281	0.997898	0.285477	-0.674889	-2.6388	0.777131	-0.163002	1.20138	-0.00450718	1.8159	1.79274	-0.509653	-0.580666	-1.0027	0.0544033	FALSE	no hit
CD3E	916	-0.0542548	-0.204616	0.289187	-0.247335	-2.0924	-5.00543	-0.777131	-0.494627	0.138431	-0.792522	0.382164	0.825653	-0.421164	-0.693635	-0.932584	0.362727	FALSE	no hit
CD59	966	0.248184	-0.312731	0.799029	0.258254	0.297231	-2.59146	2.52201	0.961149	-1.44326	-1.16559	-2.77833	-0.385854	-2.27061	-1.38751	-4.99212	-0.43221	FALSE	no hit
CD82	3732	-0.304305	-1.10032	0.0587267	0.128683	0.149617	-2.87546	2.75661	0.567696	-1.60066	-1.64301	-1.755	-1.40397	-0.85575	0.479936	-2.50924	-0.537944	FALSE	no hit
CDC25A	993	0.49043	-0.549709	1.5573	0.463696	-0.957938	-4.03511	1.36364	-0.202347	-0.653267	-1.3896	-0.619025	0.0488216	-1.99233	-1.42694	-4.19727	-0.352784	FALSE	no hit
CDH11	1009	-0.0279148	-0.987842	0.537419	0.366679	1.3773	-0.627158	3.87099	0.888079	-1.56134	-1.49445	-1.49975	-1.68983	-1.26205	0.262716	-3.18567	-0.863197	FALSE	no hit
CDIPT	10423	0.0864211	-0.884735	0.7576	0.386398	-0.558899	-3.82211	1.51027	0.635145	-2.31816	-1.82729	-3.79239	-1.33479	-2.6112	-1.7286	-5.38883	-0.71618	FALSE	no hit
CDK3	1018	-0.0271118	-0.70449	0.498114	0.12504	-0.070313	-2.89913	2.12611	0.562076	-1.77314	-1.23339	-2.57579	-1.51025	-1.47749	0.0327344	-3.91756	-0.547654	FALSE	no hit
CDKN1A	1026	-0.420283	-1.16474	-0.079663	-0.0164433	0.219707	-1.73948	1.58359	0.81501	-4.98308	-2.71978	-7.38641	-4.84306	-4.00671	-3.85173	-6.94955	-1.21884	FALSE	no hit
CECR1	51816	-0.386987	-1.49509	0.539938	-0.205809	-2.32274	-6.54374	0.131966	-0.556455	-2.69051	-1.31377	-3.952	-2.80575	-0.551638	4.10456	-5.19344	-0.566037	FALSE	no hit
CEP164	22897	0.577837	-0.702539	2.06229	0.373758	1.60091	-0.627158	4.4575	0.972391	-0.810529	-1.40164	-0.609031	-0.420912	-2.01744	-0.678734	-4.82452	-0.549063	FALSE	no hit
CFAP20	29105	-0.112085	-1.1818	0.653236	0.192309	-0.460482	-3.39612	1.74488	0.269796	-2.07739	-1.87451	-2.95001	-1.40763	-1.78393	-0.334106	-4.36977	-0.647903	FALSE	no hit
CFL2	1073	0.100266	-1.22966	1.22642	0.304031	0.58175	-1.95247	2.81527	0.882459	-2.02596	-1.77962	-1.92044	-2.37782	-1.80281	0.0768655	-4.55191	-0.933375	FALSE	no hit
CHEK1	1111	-0.359935	-1.53405	0.753122	-0.298878	-1.81729	-6.82774	1.31966	0.0562076	-3.17557	-1.86167	-2.47895	-5.18607	-1.14445	1.83621	-4.32932	-0.940239	FALSE	no hit
CHMP1B	57132	0.187551	-0.885695	1.10389	0.344463	1.13043	-1.28982	4.09093	0.590179	-2.28438	-1.52801	-2.57228	-2.75286	-2.04338	-0.30071	-4.79921	-1.03022	FALSE	no hit
CHRM2	1129	-0.250829	-1.20758	0.791518	-0.336425	-1.95924	-7.04074	0.865108	0.2979	-3.76353	-1.69584	-5.24638	-4.34837	-2.27125	0.604081	-6.61612	-0.801721	FALSE	no hit
CHRNB2	1141	-0.330234	-1.62288	0.512563	0.119613	-1.51455	-5.69176	1.11438	0.0337245	-2.6576	-1.61315	-4.29316	-2.0665	-0.588136	4.29654	-5.37962	-0.681322	FALSE	no hit
CHST4	10164	-0.0332939	-1.62992	1.61267	-0.0826245	1.62556	-0.556159	4.32554	1.10729	-2.37425	-2.12224	-2.35109	-2.64942	-1.75873	0.870409	-5.5013	-0.645303	FALSE	no hit
CILP2	148113	-0.0509908	-1.79173	1.64925	-0.0104922	1.09697	-1.02949	3.46043	0.859976	-2.45289	-2.15044	-1.81336	-3.39488	-1.47357	1.60358	-5.13396	-0.890323	FALSE	no hit
CLCF1	23529	-0.811624	-2.10589	0.340354	-0.669333	-0.933178	-4.62677	1.49561	0.331625	-3.48878	-1.71702	-4.14354	-4.60579	-0.0540473	5.26928	-4.89754	-0.533878	FALSE	no hit
CLDN3	1365	-0.771641	-2.02279	0.431226	-0.723364	-1.02785	-5.95209	2.94723	-0.0786906	-3.11568	-2.27396	-3.88858	-3.18452	-0.752164	2.50626	-4.74943	-0.0133261	FALSE	no hit
CD300E	342510	0.554013	0.426762	1.04738	0.187895	-0.335608	-2.6388	1.261	0.37097	0.814604	-0.0231716	2.22047	0.246518	-0.469776	-0.216422	-0.970189	-0.222718	FALSE	no hit
CD3G	917	0.861866	0.0992711	1.88096	0.605361	0.251258	-3.13579	3.7097	0.179864	0.100492	-0.549131	1.24253	-0.391924	-1.64511	-0.968325	-3.19692	-0.770078	FALSE	no hit
CD5L	922	0.199315	-0.285532	0.704716	0.17876	-1.32856	-4.5321	0.703816	-0.157381	-0.729798	-0.720181	-0.377264	-1.09195	-0.946652	0.263101	-2.57628	-0.526775	FALSE	no hit
CD83	9308	-0.854317	-0.873535	-0.589896	-1.09952	-3.78932	-8.24772	-1.90617	-1.21408	-2.87785	-1.28222	-2.40113	-4.95019	-0.356387	0.857443	-1.74117	-0.185435	FALSE	no hit
CDC25B	994	0.498024	-0.298406	1.30234	0.490144	0.847075	-1.66848	3.97363	0.236072	-1.14963	-1.11634	-1.15451	-1.17806	-2.15587	-1.46607	-4.18797	-0.813576	FALSE	no hit
CDH13	1012	0.17403	-0.308781	0.606836	0.224035	-0.443731	-3.04113	1.71555	-0.00562076	-1.2193	-0.890739	-0.722187	-2.04498	-1.36958	-0.749697	-2.56229	-0.796751	FALSE	no hit
CDK1	983	0.110486	-1.07106	1.0269	0.375614	-1.59945	-5.81009	1.01174	0	-1.68901	-1.24006	-2.17831	-1.64866	-1.06918	2.17977	-4.57977	-0.807527	FALSE	no hit
CDK4	1019	0.194725	-0.911396	1.30972	0.185849	-1.79634	-5.95209	0.293257	0.269796	-1.59826	-1.69319	-1.9541	-1.14751	-2.11516	-0.882273	-4.92603	-0.537162	FALSE	no hit
CDKN1C	1028	0.295141	-1.02627	1.60102	0.310675	-0.144506	-3.23046	2.03814	0.758802	-2.34303	-1.86556	-2.70591	-2.45762	-2.65606	-1.03246	-5.94088	-0.994832	FALSE	no hit
CECR6	27439	-0.516056	-1.90845	0.855518	-0.495238	-4.34511	-10.5197	-1.29033	-1.22532	-3.27169	-2.67519	-3.51387	-3.62601	-1.78989	0.329023	-5.27513	-0.423563	FALSE	no hit
CEP170	9859	-0.168161	-1.40886	1.00879	-0.104417	-1.81799	-6.14142	0.850445	-0.163002	-2.01758	-1.72955	-1.39096	-2.93225	-0.983655	1.58929	-3.82177	-0.718489	FALSE	no hit
CFAP58	159686	0.00045547	-1.23122	0.907766	0.324824	-1.04538	-5.76275	1.86218	0.764423	-2.24445	-2.28787	-3.18518	-1.2603	-2.60992	-2.08718	-5.09558	-0.646994	FALSE	no hit
CFLAR	8837	0.136069	-1.24158	1.10745	0.54234	-0.440747	-5.38409	3.12319	0.938666	-2.52108	-2.03181	-3.91436	-1.61707	-2.53679	-0.601375	-6.02906	-0.979942	FALSE	no hit
CHEK2	11200	0.215241	-1.13516	1.58315	0.197733	1.60416	-0.0118332	3.88565	0.938666	-2.1519	-1.94499	-1.48088	-3.02982	-2.19329	-0.860705	-4.75463	-0.964537	FALSE	no hit
CHMP2A	27243	0.113406	-1.2574	1.61694	-0.0193227	0.172619	-3.23046	2.81527	0.933046	-2.97579	-2.07273	-2.64047	-4.21418	-2.50558	-0.622877	-5.81825	-1.07561	FALSE	no hit
CHRM3	1131	-1.30683	-2.34292	-0.90702	-0.670537	-5.6165	-12.1053	-3.10852	-1.63564	-4.66345	-2.12442	-6.82691	-5.03901	-0.0356596	5.47282	-4.95134	-0.62846	FALSE	toxic
CHRNB3	1142	0.0788776	-1.52165	1.34572	0.412569	0.97877	-1.62114	3.41644	1.14101	-2.24541	-1.80289	-3.05118	-1.88217	-1.54155	1.8182	-5.58267	-0.860195	FALSE	no hit
CHST5	23563	0.171431	-1.27208	1.58554	0.200832	0.265925	-3.89311	3.98829	0.702595	-2.19157	-1.54645	-2.81068	-2.21758	-1.72436	1.32821	-5.73548	-0.765801	FALSE	no hit
CISD1	55847	0.302194	-0.886754	1.98424	-0.190905	-0.0794452	-4.08244	3.56307	0.281038	-2.05496	-0.833586	-1.90482	-3.42648	-1.31937	2.58171	-5.83185	-0.707964	FALSE	no hit
CLCN1	1180	-0.0387331	-1.61104	1.26161	0.233232	-2.85729	-9.3837	1.07039	-0.258555	-1.16657	-1.48959	-2.16318	0.153078	-0.380956	3.79643	-4.75057	-0.188735	FALSE	no hit
CLDN4	1364	-0.21265	-1.61395	1.2356	-0.259594	-1.39712	-6.37808	2.43403	-0.247313	-1.37621	-1.41797	-1.71942	-0.991227	-0.190506	3.67454	-4.16409	-0.0819759	FALSE	no hit
CD300LB	124599	0.0385886	0.351795	-0.293559	0.0575297	-0.519206	-3.11212	1.62758	-0.0730698	0.5165	-0.0593025	0.716728	0.892075	0.185717	0.218786	0.236573	0.101792	FALSE	no hit
CD4	920	0.569204	-0.385342	1.57674	0.516212	-1.08118	-4.65044	1.52494	-0.118036	0.886407	-0.161234	2.15201	0.668449	0.175261	2.91864	-1.95542	-0.437445	FALSE	no hit
CD6	923	0.109975	-0.133258	0.398568	0.0646142	0.955456	0.0591659	2.41937	0.387832	-0.656508	-0.759649	-0.997298	-0.212576	-1.16221	-0.725167	-2.54409	-0.217373	FALSE	no hit
CD84	8832	-0.139168	-0.418559	0.0244586	-0.0234036	-1.5857	-5.78642	0.894433	0.134898	-1.3	-1.48347	-1.71878	-0.697755	-1.53587	-2.00394	-2.40503	-0.198623	FALSE	no hit
CDC25C	995	-0.376604	-1.0966	-0.0630904	0.0298766	-1.66522	-5.14743	0.337245	-0.185485	-1.4462	-1.25643	-1.64604	-1.43614	-0.133675	2.0286	-1.97763	-0.451993	FALSE	no hit
CDH15	1013	0.190258	-0.699026	0.52433	0.745469	1.79429	1.33715	3.34313	0.702595	-0.344621	-0.733872	-1.19732	0.897327	-0.484319	2.03802	-2.91059	-0.580386	FALSE	no hit
CDK10	8558	-1.53427	-2.08281	-1.35782	-1.16218	-4.26973	-9.97536	-1.97948	-0.854355	-4.50263	-2.29361	-5.53854	-5.67573	-0.0516146	3.20943	-3.08629	-0.277992	FALSE	no hit
CDK5	1020	-0.142967	-0.932143	0.397844	0.105397	0.410761	-1.64481	2.47802	0.399074	-2.05266	-1.10445	-3.71061	-1.34291	-1.20896	1.55671	-4.73685	-0.446739	FALSE	no hit
CDKN3	1033	-0.115104	-1.16306	0.294829	0.522915	-0.252171	-3.27779	2.63931	-0.118036	-1.44448	-1.0932	-2.66405	-0.5762	-0.451938	3.02735	-3.71709	-0.666068	FALSE	no hit
CEL	1056	-1.59989	-2.80645	-1.07043	-0.922788	-5.45735	-11.4663	-3.34313	-1.56257	-4.23788	-2.73457	-4.7063	-5.27277	0.68405	5.4076	-2.92344	-0.432004	TRUE	toxic
CEP250	11190	-0.118674	-1.43347	1.09495	-0.0174927	-0.283855	-2.68613	1.67156	0.163002	-1.64147	-1.64211	-1.81221	-1.47008	-0.858614	2.16183	-4.34454	-0.393126	FALSE	no hit
CFAP70	118491	0.0979858	-1.08328	1.39182	-0.0145868	0.490592	-3.89311	4.51616	0.848734	-1.55589	-1.46681	-1.68929	-1.51155	-1.5131	0.606538	-4.75721	-0.388627	FALSE	no hit
CFP	5199	-0.29264	-1.47654	0.751222	-0.152607	0.423495	-2.1418	3.18184	0.230451	-2.35855	-1.87699	-2.96275	-2.23591	-1.36494	1.14619	-4.78006	-0.460945	FALSE	no hit
CHGA	1113	-0.519202	-1.24578	0.0900662	-0.401889	-1.10785	-4.7451	1.5396	-0.118036	-3.31451	-1.60085	-3.9041	-4.43858	-1.28607	1.2668	-4.32969	-0.795307	FALSE	no hit
CHMP2B	25978	0.219099	-1.09346	1.26846	0.482305	0.838955	-2.16547	3.78301	0.899321	-2.16183	-1.26015	-3.95855	-1.2668	-1.81793	1.63295	-6.24612	-0.840619	FALSE	no hit
CHRM4	1132	-0.432108	-1.84625	0.724353	-0.174429	-0.415027	-3.84578	2.18476	0.415936	-3.5797	-1.89543	-4.27939	-4.56428	-1.09655	3.11716	-5.4171	-0.989711	FALSE	no hit
CHRNB4	1143	-0.0915277	-1.69766	1.41821	0.0048661	0.572747	-2.92279	4.20824	0.432798	-3.06934	-1.96003	-2.94172	-4.30626	-1.67924	1.72478	-5.68648	-1.07603	FALSE	no hit
CHST6	4166	-0.312868	-1.77943	0.681312	0.15951	-0.558191	-5.12376	3.12319	0.326004	-2.07517	-1.67346	-2.94619	-1.60585	-0.485595	3.68111	-4.52452	-0.613372	FALSE	no hit
CIT	11113	-0.484119	-1.73829	0.779754	-0.493824	-1.64977	-6.75674	1.96482	-0.157381	-2.89061	-1.88534	-3.14375	-3.64274	-0.967593	2.45207	-4.90468	-0.450175	FALSE	no hit
CLCN2	1181	-0.503007	-1.81719	0.576922	-0.268751	-0.0929418	-3.68012	2.91791	0.483385	-1.82355	-1.90481	-2.96915	-0.596678	-0.342319	3.24325	-4.27775	0.00754438	FALSE	no hit
CLDN5	7122	-0.650684	-2.0032	0.482097	-0.430951	0.177639	-4.22444	4.36953	0.387832	-2.5438	-1.69433	-3.1907	-2.74638	0.0540578	4.76295	-4.35405	-0.246727	TRUE	no hit
CD300LD	100131439	0.197242	0.145729	0.535994	-0.0899974	-0.487201	-4.29544	2.65397	0.179864	0.962735	-0.338941	2.60885	0.618294	0.0674831	-0.0850037	0.116023	0.17143	FALSE	no hit
CD40	958	-1.00052	-1.49887	-1.01563	-0.487073	-3.4294	-8.01106	-1.23168	-1.04546	-1.99224	-2.23471	-1.40473	-2.33727	-0.217708	-0.378888	-0.149274	-0.124964	FALSE	no hit
CD63	967	-0.477098	-1.2076	-0.216384	-0.00730986	-3.3875	-8.81571	-0.689154	-0.657628	-1.10628	-1.64187	-0.910754	-0.766221	-0.148428	1.2465	-1.42465	-0.267128	FALSE	no hit
CD86	942	0.0961915	-0.705257	0.994637	-0.000805243	-0.758609	-3.72745	1.45162	0	-0.931685	-0.868766	-0.210291	-1.716	-0.524763	1.85537	-2.93049	-0.499165	FALSE	no hit
CDC37	11140	-0.385734	-0.972138	0.344465	-0.529529	-3.54817	-8.46072	-1.21702	-0.96677	-2.48435	-1.58091	-2.23461	-3.63752	-1.23787	0.0502884	-3.27281	-0.491087	FALSE	no hit
CDH16	1014	-0.442119	-0.98155	0.384182	-0.728988	-1.65342	-5.28943	0.615839	-0.286659	-2.32903	-1.48155	-1.79027	-3.71526	-0.920738	0.616025	-3.12401	-0.254231	FALSE	no hit
CDK11B	984	-0.0689249	-0.824704	0.379604	0.238325	-1.85808	-4.31911	-0.850445	-0.404694	-1.13543	-0.806672	-2.23709	-0.362526	-0.456939	2.42038	-3.41571	-0.375484	FALSE	no hit
CDK5R1	8851	-1.25046	-1.98974	-0.913895	-0.84775	-6.05695	-12.7207	-3.46043	-1.98975	-1.86094	-1.60496	0.0370275	-4.01489	3.35099	5.45483	4.77809	-0.179937	TRUE	toxic
CDNF	441549	-0.417534	-1.25924	0.413507	-0.406866	-0.02211	-2.7098	2.19943	0.44404	-2.53924	-1.3188	-4.16564	-2.13328	-0.979523	2.52348	-5.23484	-0.227209	FALSE	no hit
CELA1	1990	-2.03402	-2.72955	-1.94846	-1.42405	-4.9623	-9.54937	-3.72436	-1.61316	-5.21816	-2.45807	-7.40439	-5.79202	0.670606	5.56316	-3.53029	-0.0210581	TRUE	toxic
CEP41	95681	-0.216253	-0.981681	0.473021	-0.140098	-0.645161	-4.57944	2.34605	0.2979	-2.14024	-1.28805	-3.83366	-1.29902	-1.33736	1.20572	-4.98184	-0.235953	FALSE	no hit
CFB	629	-0.505236	-1.20444	-0.142948	-0.168318	-1.42591	-5.12376	0.542525	0.303521	-2.69975	-1.75968	-4.2306	-2.10898	-1.44073	0.291838	-4.16767	-0.446366	FALSE	no hit
CFTR	1080	0.0750329	-1.17546	1.02776	0.372793	-0.896508	-4.65044	2.14078	-0.179864	-2.51987	-1.26584	-3.53414	-2.75962	-1.5198	2.11075	-5.58916	-1.08098	FALSE	no hit
CHGB	1114	0.714719	-0.571752	1.91835	0.797557	0.690371	-1.26615	2.59532	0.74194	-1.04038	-0.79132	-2.36737	0.0375377	-1.93344	0.965279	-5.929	-0.836601	FALSE	no hit
CHMP3	51652	-0.0442813	-1.16263	0.933511	0.0962777	-0.199878	-4.76877	3.60706	0.562076	-1.71637	-1.34623	-2.56225	-1.24062	-1.09896	1.72177	-4.55446	-0.464179	FALSE	no hit
CHRM5	1133	-0.017254	-1.59467	1.83582	-0.29291	-0.00369143	-3.32512	2.71263	0.601421	-2.44692	-2.22291	-1.29781	-3.82003	-1.74478	0.259755	-4.79683	-0.697273	FALSE	no hit
CHRND	1144	-0.818706	-2.09727	0.552059	-0.910906	-3.09537	-8.38972	-0.131966	-0.764423	-4.20571	-2.25257	-4.53722	-5.82735	-1.13808	2.77192	-5.60537	-0.580794	FALSE	no hit
CHST7	56548	-0.686258	-1.64296	0.297779	-0.713595	-3.735	-10.4724	0.425222	-1.15788	-3.75789	-1.55386	-4.29907	-5.42073	-0.691809	3.49299	-4.93634	-0.632071	FALSE	no hit
CKAP4	10970	-0.373068	-2.12077	1.1476	-0.146032	-1.69113	-6.63841	1.74488	-0.179864	-2.64588	-1.58865	-2.967	-3.38198	0.682917	8.12712	-5.35898	-0.719384	TRUE	no hit
CLCN3	1182	-0.409907	-2.10761	0.871985	0.00590675	-1.07937	-6.02308	2.82993	-0.0449661	-2.71422	-1.70184	-3.91427	-2.52654	-0.296857	5.32221	-5.52952	-0.683255	FALSE	no hit
CLDND1	56650	-0.835838	-2.17634	0.444719	-0.775892	-1.61902	-6.52008	1.80353	-0.140519	-3.16239	-1.72391	-4.19203	-3.57123	0.169455	5.8839	-5.22926	-0.146272	TRUE	no hit
CD300LF	146722	0.00915418	-0.11358	0.316458	-0.175416	-1.1636	-3.94045	0.337245	0.112415	0.142474	-0.931795	0.767511	0.591706	-0.626327	-1.41367	-0.731204	0.265892	FALSE	no hit
CD40LG	959	0.293019	-0.609271	1.27613	0.212199	0.228256	-2.33113	1.96482	1.05108	0.562673	-0.662017	1.49061	0.859428	-0.0742669	1.87354	-2.00366	-0.0926742	FALSE	no hit
CD68	968	-1.04985	-1.47309	-1.16866	-0.507804	-4.22809	-9.40737	-2.36072	-0.916183	-2.28556	-1.93207	-2.25604	-2.66856	0.175418	1.25566	-0.543508	-0.185899	TRUE	no hit
CD8A	925	0.259711	-0.718655	1.54878	-0.0509931	0.708125	-1.40815	2.49268	1.03984	-0.91258	-1.6309	-0.664756	-0.442079	-1.9481	-1.48631	-4.19994	-0.158061	FALSE	no hit
CDC42	998	-0.461032	-1.24157	0.0772323	-0.218757	-0.637632	-4.34277	1.86218	0.567696	-2.92791	-2.13717	-3.77026	-2.87629	-1.88763	-0.96166	-4.13105	-0.570168	FALSE	no hit
CDH17	1015	0.051529	-0.853148	1.08697	-0.079232	0.385478	-2.18914	2.72729	0.618283	-1.35613	-1.37955	-0.799359	-1.88949	-1.2551	0.198327	-3.4794	-0.484226	FALSE	no hit
CDK12	51755	-1.43622	-3.84598	-0.0690539	-0.393613	-1.30912	-4.31911	0.161291	0.230451	-1.50481	2.24567	-3.72594	-3.03416	10.6268	35.88	-3.56416	-0.4354	TRUE	no hit
CDK5RAP2	55755	-0.516546	-1.71698	0.410291	-0.242948	-1.41223	-5.40776	1.261	-0.0899321	-3.30761	-2.51332	-4.20019	-3.20934	-1.87947	-0.0843707	-4.97738	-0.576657	FALSE	no hit
CDO1	1036	-1.24821	-2.37587	-0.493985	-0.874771	-2.50376	-6.96974	0.0879771	-0.629525	-4.40147	-2.65339	-5.92422	-4.6268	-0.778807	3.0039	-5.04396	-0.296363	FALSE	no hit
CELA2A	63036	0.0459985	-1.43098	1.10312	0.465853	-0.38216	-3.01746	1.46628	0.404694	-1.43074	-1.67594	-2.98235	0.366058	-1.24125	1.79441	-5.10218	-0.415968	FALSE	no hit
CEP55	55165	-0.300113	-1.69809	1.33878	-0.541032	-1.13759	-4.72144	1.39297	-0.0843113	-2.10151	-1.26728	-3.01841	-2.01884	-0.15781	5.23654	-5.73553	0.0255678	FALSE	no hit
CFC1	55997	-2.27054	-2.95989	-2.06062	-1.79112	-7.268	-15.75	-3.85633	-2.19772	-6.07492	-2.96502	-6.68406	-8.57568	0.754287	5.38273	-2.8087	-0.311169	TRUE	toxic
CGA	1081	-0.390942	-1.61075	0.505421	-0.0675027	0.889876	-2.33113	4.20824	0.792527	-3.37683	-2.07212	-4.24175	-3.81663	-1.65569	1.26537	-5.29046	-0.941973	FALSE	no hit
CHI3L1	1116	-1.51543	-2.5736	-0.844233	-1.12846	-4.02804	-9.97536	-0.967748	-1.14101	-4.24593	-2.31122	-5.13173	-5.29484	0.608102	5.48944	-3.43425	-0.230886	TRUE	no hit
CHMP4A	29082	-0.532767	-2.10762	0.896788	-0.38747	-1.69044	-6.56741	1.64224	-0.14614	-3.88361	-2.68984	-4.13021	-4.83076	-1.88258	0.85691	-5.64272	-0.861938	FALSE	no hit
CHRNA1	1134	-0.5387	-1.89291	0.308324	-0.0315142	0.271661	-3.20679	3.24049	0.781285	-3.91684	-2.37198	-5.623	-3.75554	-1.99507	1.16225	-6.18957	-0.957894	FALSE	no hit
CHRNE	1145	-0.429782	-2.08635	0.898382	-0.101375	0.389929	-3.18312	3.43111	0.921804	-3.65789	-2.35289	-5.61425	-3.00653	-1.82918	2.16832	-6.98413	-0.671738	FALSE	no hit
CHST8	64377	0.199892	-1.82466	2.49265	-0.0683073	-0.70807	-5.28943	3.25515	-0.0899321	-1.75207	-2.09547	-0.520828	-2.63992	-1.31568	1.98591	-5.33195	-0.600999	FALSE	no hit
CKB	1152	-0.433224	-1.88972	1.09038	-0.500334	-1.27254	-6.73307	2.85925	0.0562076	-2.79546	-1.92079	-3.45415	-3.01143	-0.749218	3.50323	-5.46114	-0.289747	FALSE	no hit
CLCN4	1183	-0.312321	-2.06622	1.49364	-0.364388	0.874699	-2.73346	4.3402	1.01736	-3.17895	-2.16226	-3.69447	-3.68011	-1.16427	3.35664	-6.28138	-0.568052	FALSE	no hit
CLEC10A	10462	-0.948818	-2.46886	0.586123	-0.963719	-2.24534	-8.81571	2.36072	-0.281038	-3.42438	-2.22884	-4.22325	-3.82106	-0.159972	4.93513	-5.43689	0.0218409	FALSE	no hit
CD300LG	146894	0.087394	-0.539135	1.00905	-0.20773	-0.408407	-3.13579	1.87684	0.0337245	1.09594	-0.582584	2.97472	0.895677	0.740512	1.875	0.0250397	0.321501	FALSE	no hit
CD44	960	-0.152962	-0.0697136	-0.30107	-0.0881037	-0.574835	-3.27779	1.261	0.292279	-0.643461	-0.516228	-1.92195	0.507795	-0.555217	0.235848	-2.011	0.109504	FALSE	no hit
CD69	969	-0.333088	-1.10219	0.408351	-0.305426	-1.71074	-5.0291	0.0879771	-0.191106	-1.59193	-1.54136	-0.826794	-2.40762	-0.492033	1.16019	-2.27781	-0.358487	FALSE	no hit
CD8B	926	0.278328	-0.437165	1.35569	-0.0835439	1.65754	1.00582	2.93257	1.03422	-0.993536	-1.22303	-0.695205	-1.06238	-1.75446	-1.29146	-3.71749	-0.254413	FALSE	no hit
CDC42BPA	8476	-0.112704	-1.04182	1.33784	-0.63413	-1.24698	-4.43744	1.20235	-0.505868	-0.676292	-1.2096	0.407114	-1.22639	-0.126557	1.8741	-2.53498	0.281208	FALSE	no hit
CDH2	1000	-1.05164	-1.68434	-0.306641	-1.16393	-3.30547	-7.15907	-1.62758	-1.12977	-4.98792	-2.30373	-5.43805	-7.22198	-1.65622	0.543854	-4.90482	-0.607687	FALSE	no hit
CDK13	8621	-0.498694	-1.13185	-0.176361	-0.187872	-2.4	-7.67973	0.923759	-0.44404	-1.53546	-1.35397	-2.21394	-1.03846	-0.302429	1.88777	-2.64433	-0.150729	FALSE	no hit
CDK6	1021	-1.56526	-2.39092	-1.0195	-1.28535	-5.65266	-12.413	-3.04987	-1.49512	-3.15806	-2.21883	-2.68552	-4.56984	1.50191	5.45485	-1.08319	0.134084	TRUE	toxic
CDON	50937	0.475656	-0.846454	1.51834	0.755078	-0.918353	-3.27779	0.674491	-0.15176	-1.06428	-1.22852	-2.19496	0.23065	-1.77585	0.732305	-5.31908	-0.740761	FALSE	no hit
CELA2B	51032	-0.54332	-1.38614	0.327842	-0.571664	-1.38033	-5.05276	1.04106	-0.129277	-3.14728	-1.63819	-4.61021	-3.19344	-1.15105	2.01147	-5.17276	-0.29187	FALSE	no hit
CEP89	84902	-0.262666	-1.66144	0.741377	0.132069	0.0435083	-1.73948	1.51027	0.359728	-1.48089	-1.35388	-4.38079	1.29198	-0.448847	4.30218	-5.77903	0.13031	FALSE	no hit
CFC1B	653275	0.400282	-1.8536	2.6415	0.41295	1.97483	-0.201164	4.76542	1.36022	-0.769846	-2.01173	-0.255507	-0.0423008	-1.13927	2.52851	-5.44891	-0.497404	FALSE	no hit
CGB7	94027	-0.238134	-1.68414	1.20477	-0.235036	0.336628	-2.68613	3.3138	0.382211	-2.7293	-1.63633	-3.57316	-2.9784	-0.91134	3.56769	-5.77691	-0.524806	FALSE	no hit
CHI3L2	1117	-0.521829	-1.74639	0.554478	-0.373577	-1.63821	-7.18273	2.566	-0.2979	-2.7921	-2.00565	-4.23302	-2.13763	-1.03071	2.2288	-5.22157	-0.0993501	FALSE	no hit
CHMP4B	128866	-1.74454	-2.67973	-1.03898	-1.51491	-3.81039	-9.8097	-0.806456	-0.81501	-6.04407	-3.11325	-8.13899	-6.87998	-1.29408	2.33991	-6.08322	-0.138945	FALSE	no hit
CHRNA10	57053	-2.09223	-3.26407	-1.34079	-1.67182	-5.42604	-12.7207	-1.87684	-1.68061	-6.93299	-3.92699	-8.1087	-8.76329	-1.2258	2.10874	-5.2097	-0.576433	FALSE	no hit
CHRNG	1146	-0.525964	-2.26203	1.11712	-0.432988	-3.45009	-8.76838	-1.07039	-0.511489	-3.38179	-2.35098	-4.06032	-3.73409	-1.01504	3.26254	-5.77673	-0.530924	FALSE	no hit
CHST9	83539	-0.278143	-2.03973	1.20318	0.00211927	-0.109997	-2.87546	2.47802	0.0674491	-2.58005	-1.97157	-3.55683	-2.21175	-0.92583	3.65799	-5.78186	-0.653617	FALSE	no hit
CKLF	51192	-0.865365	-2.3621	-0.146176	-0.0878226	-1.75407	-6.54374	1.68623	-0.404694	-2.91245	-1.73227	-4.17903	-2.82606	0.646347	6.81641	-4.19531	-0.682054	TRUE	no hit
CLCN5	1184	-0.714305	-2.47694	0.776649	-0.442618	-1.71301	-5.81009	1.33432	-0.663249	-3.63319	-2.17494	-4.24083	-4.48379	-0.170442	5.70523	-5.5551	-0.661455	FALSE	no hit
CLEC11A	6320	-1.59908	-2.9781	-0.684176	-1.13496	-5.21169	-12.91	-1.05572	-1.66936	-4.79252	-2.66208	-5.94206	-5.7734	0.555702	6.6877	-4.72747	-0.293124	TRUE	no hit
CD302	9936	-0.387375	-0.653732	-0.119073	-0.389322	-2.15257	-5.36043	-0.366571	-0.730698	0.0601593	-0.576119	0.224041	0.532556	0.85114	2.60171	-0.452684	0.404391	FALSE	no hit
CD46	4179	-0.63189	-1.05231	0.0705695	-0.913925	-3.25845	-7.4904	-1.21702	-1.06794	-0.529233	-0.806871	0.244212	-1.02504	1.36672	4.2085	-0.741091	0.632747	TRUE	no hit
CD7	924	-0.706756	-0.678454	-0.380738	-1.06108	-2.19328	-5.38409	-0.571851	-0.623904	-1.70046	-0.957804	-1.45637	-2.68721	0.110931	1.23399	-1.3308	0.429604	TRUE	no hit
CD9	928	-0.356653	-0.658078	0.231579	-0.643459	-0.613803	-2.47313	0.659828	-0.0281038	-1.36039	-0.8254	-1.37297	-1.8828	-0.0771103	1.96799	-2.32464	0.125322	FALSE	no hit
CDC42BPB	9578	-0.0400034	-0.457197	0.384809	-0.0476225	-2.1948	-5.73909	-0.322583	-0.52273	-0.234658	-0.64243	-0.356405	0.29486	-0.0594133	1.4156	-1.6659	0.0720568	FALSE	no hit
CDH26	60437	-0.481495	-0.871892	-0.123721	-0.448873	-1.10943	-4.22444	0.733142	0.163002	-1.65139	-0.839089	-2.60212	-1.51297	0.0346004	2.81197	-2.7496	0.0414337	TRUE	no hit
CDK14	5218	-0.897635	-1.40249	-0.414617	-0.875798	-2.93199	-6.54374	-1.17303	-1.07919	-2.41001	-1.57015	-2.2514	-3.40846	0.0872441	2.22572	-1.98839	0.0244003	TRUE	no hit
CDK7	1022	-0.461346	-1.35592	0.213034	-0.241156	-1.89874	-5.81009	0.777131	-0.663249	-1.90759	-1.13344	-2.52758	-2.06176	0.13318	4.05466	-3.39236	-0.262764	TRUE	no hit
CDSN	1041	-0.260606	-1.77585	1.18607	-0.19204	0.112218	-4.05878	4.04694	0.348487	-1.69686	-1.26183	-1.88859	-1.94017	0.411627	6.02414	-4.40544	-0.383813	TRUE	no hit
CELA3A	10136	-1.08946	-1.95105	-0.281137	-1.03619	-4.40769	-10.0464	-1.64224	-1.53447	-2.7869	-1.68483	-4.32405	-2.35182	0.538351	4.74415	-3.62386	0.494754	TRUE	no hit
CEPT1	10390	0.421478	-0.851536	2.54536	-0.429392	-0.665955	-4.39011	2.37538	0.0168623	-1.59797	-0.670071	-1.57236	-2.55148	-1.23008	2.74333	-6.21755	-0.216032	FALSE	no hit
CFD	1675	-0.335526	-1.69582	1.10799	-0.418747	-1.66898	-5.88109	1.55426	-0.680112	-2.78503	-1.69532	-3.8409	-2.81888	-0.988829	3.27287	-5.86915	-0.370202	FALSE	no hit
CGREF1	10669	-1.09062	-2.39255	0.304827	-1.18414	-3.96709	-9.26537	-1.61291	-1.02298	-3.9168	-1.94254	-4.81425	-4.9936	0.341598	6.27996	-5.2586	0.00343716	TRUE	no hit
CHIA	27159	0.0841781	-1.33413	1.53954	0.0471222	-1.65065	-6.02308	1.29033	-0.219209	-1.78842	-0.969044	-2.88042	-1.51578	-0.509218	4.49242	-5.55643	-0.463641	FALSE	no hit
CHMP4C	92421	-0.340189	-2.13842	1.80995	-0.692104	-2.22037	-6.21241	0.293257	-0.74194	-2.52483	-1.96007	-2.7307	-2.88373	-0.474027	4.60257	-6.02978	0.00513114	FALSE	no hit
CHRNA2	1135	-0.53919	-2.14945	1.15244	-0.62056	-1.84592	-5.71542	0.689154	-0.511489	-3.11705	-2.15551	-4.80296	-2.39268	-0.951356	3.83492	-6.68501	-0.00397599	FALSE	no hit
CHST1	8534	-0.0357766	-1.75434	2.18334	-0.536327	-0.557042	-3.94045	2.25808	0.0112415	-2.37533	-1.6437	-2.1553	-3.32698	-0.834368	4.01176	-6.17196	-0.342909	FALSE	no hit
CHSY1	22856	0.735793	-2.01089	4.10908	0.109187	-2.72535	-8.88671	1.07039	-0.359728	-0.277846	-1.40249	0.917974	-0.349023	-0.106564	6.43524	-6.65877	-0.0961581	FALSE	no hit
CKM	1158	0.274705	-1.36993	1.84839	0.345663	-0.577356	-4.93443	3.26981	-0.0674491	-2.56662	-1.37243	-3.22689	-3.10054	-1.53227	2.84387	-6.3289	-1.11178	FALSE	no hit
CLCN6	1185	0.0328398	-1.88436	2.30581	-0.322928	-1.56272	-6.23608	2.00881	-0.460902	-2.90309	-1.41597	-2.97272	-4.32059	-0.646644	5.70853	-6.87949	-0.768971	FALSE	no hit
CLEC12A	160364	-0.19077	-1.92733	1.64026	-0.285244	-1.89708	-7.0644	1.86218	-0.489006	-2.95117	-1.63795	-3.96282	-3.25274	-0.755694	4.87757	-6.61119	-0.533459	FALSE	no hit
CLEC12B	387837	1.18075	0.940928	0.857695	1.74363	-1.67317	-1.32176	-2.41737	-1.28039	0.853331	0.79698	1.23349	0.529523	-1.20383	-0.257336	-0.189419	-3.16474	FALSE	no hit
CLEC7A	64581	1.37577	1.31766	0.678645	2.131	-1.70934	-0.825722	-1.28423	-3.01806	1.47963	1.7216	1.6349	1.0824	-0.525793	0.788269	0.311429	-2.67708	FALSE	no hit
CLPS	1208	0.924831	0.108791	1.0604	1.60531	-1.80145	-0.674491	-2.36342	-2.36643	0.515412	0.30635	0.707272	0.532614	-1.04959	0.15823	-0.82973	-2.47726	FALSE	no hit
CMKLR1	1240	0.0758021	-0.552465	0.641855	0.138016	-3.23166	-1.45484	-3.70161	-4.53852	-0.417949	-0.467809	-0.627009	-0.159029	-0.907499	-0.148711	-1.77921	-0.794572	FALSE	toxic
CNGA1	1259	0.322562	-0.183921	0.401615	0.749992	-3.59597	-1.98113	-4.74841	-4.05838	-0.567385	-0.732338	-1.05827	0.088451	-1.54568	-1.02052	-1.95718	-1.65934	FALSE	toxic
CNOT6L	246175	0.531043	0.878193	0.934949	-0.220013	-2.42099	-0.995101	-2.83826	-3.42961	-0.277778	-0.30437	-0.101687	-0.427276	-1.42755	-1.71881	-1.53916	-1.02468	FALSE	no hit
CNTNAP3	79937	-0.779415	-1.20112	0.0737584	-1.21088	-5.36035	-3.58418	-5.94631	-6.55056	-1.33714	-1.91966	-1.00581	-1.08594	-1.02625	-1.49284	-1.62671	0.0408058	FALSE	toxic
COL15A1	1306	-0.208882	-0.344688	0.779804	-1.06176	-1.75411	-1.02535	-2.385	-1.85199	-0.34465	-0.544931	-0.214178	-0.27484	-0.325052	-0.558011	-1.44929	1.03214	FALSE	no hit
COL27A1	85301	-0.0449915	0.400451	0.705491	-1.24092	-1.09557	-1.02535	-0.615136	-1.64621	-0.363657	-0.22424	-0.23466	-0.632071	-0.609646	-1.074	-1.49051	0.73557	FALSE	no hit
COL6A2	1292	0.312053	-0.146626	1.25466	-0.17187	-1.18167	-0.28129	-1.64036	-1.62335	0.405682	-0.189383	0.31771	1.08872	0.0934558	-0.357121	-1.27855	1.91604	FALSE	no hit
COMMD1	150684	-1.40846	-0.903126	-0.482143	-2.8401	-4.50364	-2.2231	-5.51464	-5.77318	-1.64838	-1.71182	-0.992253	-2.24106	-0.630838	-1.58907	-1.20664	0.903197	FALSE	toxic
COQ8B	79934	-0.59857	-1.09502	0.414581	-1.11527	-2.86377	-0.831771	-3.32389	-4.43563	-1.34919	-1.6298	-1.3113	-1.10647	-1.41212	-1.15236	-2.2809	-0.803106	FALSE	toxic
COX7A1	1346	0.498769	0.193558	1.69883	-0.396077	-0.437194	1.34596	-0.87414	-1.7834	0.13848	-0.333774	0.199815	0.549399	-0.667013	-1.21872	-1.74678	0.964467	FALSE	no hit
CPB2	1361	-0.337369	-0.616744	0.634411	-1.02977	-2.67974	-0.934608	-3.5721	-3.5325	-0.737541	-1.29311	-1.14589	0.226377	-0.666356	-1.30359	-2.32256	1.62708	FALSE	toxic
CPNE9	151835	-1.75939	-2.01864	-0.829814	-2.42972	-3.11433	-1.46694	-4.05774	-3.8183	-1.79574	-1.69875	-1.6906	-1.99785	-0.553164	-0.352595	-1.71137	0.404472	FALSE	toxic
CR1L	1379	-1.1749	-0.823403	-0.542513	-2.15878	-3.38557	-1.19473	-4.25199	-4.71	-1.27187	-0.836811	-1.60203	-1.37676	-0.391369	-0.529381	-1.83347	1.18875	FALSE	toxic
CREG2	200407	-1.35956	-1.44506	-0.426269	-2.20736	-3.69593	-1.93878	-4.95346	-4.19556	-1.43422	-1.53478	-1.29136	-1.47653	-0.407713	-0.675468	-1.58752	1.03985	FALSE	toxic
CRKL	1399	-2.47205	-2.94218	-1.06906	-3.40492	-6.01562	-3.86244	-5.8276	-8.35683	-1.38724	-1.87098	-0.183869	-2.10686	1.45503	1.1146	0.192757	3.05773	TRUE	toxic
CRYZ	1429	-0.824426	-1.48379	1.48993	-2.47941	-2.05494	-1.31571	-2.66559	-2.18352	-0.969784	-1.55696	-0.257146	-1.09525	-0.0940828	-0.765568	-1.98548	2.4688	FALSE	no hit
CSN2	1447	-0.74771	-1.97522	1.0961	-1.36401	-3.00407	-0.928559	-2.87063	-5.21301	-1.32942	-2.36316	-0.688141	-0.936962	-1.05483	-1.41818	-2.16236	0.41604	FALSE	no hit
CSRP1	1465	-0.899301	-1.24105	0.671895	-2.12875	-2.28044	-0.855968	-3.93903	-2.04634	-0.690215	-1.01213	-0.198065	-0.860452	0.259112	-0.119089	-1.20598	2.10241	TRUE	no hit
CLEC14A	161198	0.254117	0.126875	-0.214328	0.849806	1.49473	0.0393201	4.66208	-0.217209	1.41855	0.240165	3.56846	0.447043	0.343407	-0.0954297	2.79747	-1.67182	FALSE	no hit
CLEC9A	283420	0.796179	0.582172	-0.171083	1.97745	0.878542	0.269191	0	2.36643	0.835683	0.055091	0.521887	1.93007	-0.641535	-0.852411	-0.0569399	-1.01525	FALSE	no hit
CLPSL2	389383	-0.257923	-1.83137	0.0943351	0.963265	-0.432972	-0.613998	0.561176	-1.24609	-0.00474754	-0.873089	0.410961	0.447885	-0.439348	0.714134	-0.406246	-1.62593	FALSE	no hit
CMPK1	51727	-0.471535	-1.82121	0.630934	-0.224333	-0.643644	-0.722885	-1.21948	0.011432	-0.743774	-1.99511	-0.195735	-0.0404782	-0.926184	-0.906268	-1.36529	-0.506996	FALSE	no hit
CNGA2	1260	-0.782904	-1.34193	-0.302215	-0.704565	-1.41748	-0.372029	-1.65115	-2.22925	-0.993079	-1.40409	-0.288515	-1.28663	-1.05267	-0.682678	-0.695124	-1.78021	FALSE	no hit
CNP	1267	0.019875	0.478366	0.0718962	-0.490637	0.208932	0.0635171	0.140294	0.422986	-0.123693	-0.0760898	-0.106037	-0.188953	-0.643921	-0.903306	-0.897147	-0.13131	FALSE	no hit
CNTNAP3B	728577	-0.149989	-0.0556433	-0.117055	-0.27727	-0.786984	-0.0453693	-1.43532	-0.880268	-1.16811	-1.12873	-1.40527	-0.970316	-2.00936	-1.98301	-1.94781	-2.09727	FALSE	no hit
COL16A1	1307	-2.1511	-2.99197	-0.442074	-3.01927	-4.28071	-2.28359	-4.51099	-6.04755	-2.96861	-4.02026	-1.8025	-3.08307	-1.61173	-2.37183	-2.07515	-0.388215	FALSE	toxic
COL28A1	340267	-0.415575	-0.108627	0.0940938	-1.23219	-0.4	0.674491	-0.777013	-1.09748	-0.623699	-0.45584	-0.853915	-0.561342	-0.642663	-0.854013	-1.63047	0.556496	FALSE	no hit
COL6A3	1293	-0.541562	-0.353498	0.352475	-1.62366	-0.623238	-0.0756156	-0.205045	-1.58905	-1.04451	-1.11888	-0.349864	-1.66478	-1.21664	-1.49553	-1.37777	-0.77662	FALSE	no hit
COMMD7	149951	-0.861791	-0.926472	-0.145432	-1.51347	-1.61582	-0.456718	-2.29866	-2.09206	-0.62841	-0.71352	-0.511553	-0.660156	-0.0569139	-0.21236	-1.05544	1.09706	FALSE	no hit
CORIN	10699	-0.762349	-0.87791	0.390268	-1.7994	-2.49152	-1.06164	-3.66923	-2.74369	-1.71993	-2.46918	-1.05291	-1.63771	-1.69153	-2.83607	-1.96811	-0.270411	FALSE	no hit
COX7A2	1347	0.131738	1.66832	0.88827	-2.16137	-2.48185	-0.710786	-4.02536	-2.7094	-0.679391	-0.625293	-1.0533	-0.359577	-0.781597	-3.12712	-2.36608	3.14842	FALSE	no hit
CPD	1362	0.136484	0.295373	1.22468	-1.1106	-2.16645	-0.807574	-2.9138	-2.77799	-0.000933762	0.183304	-0.208908	0.0228027	-0.232472	-0.288024	-1.73504	1.32565	FALSE	no hit
CPO	130749	-1.01709	-0.316992	-0.296962	-2.43733	-1.98206	-0.862017	-2.55767	-2.52648	-1.71726	-1.28313	-2.1693	-1.69935	-1.2122	-1.81194	-2.58	0.755343	FALSE	no hit
CR2	1380	-1.23001	-1.6301	0.225551	-2.28549	-0.945809	0.0453693	-2.66559	-0.217209	-1.23353	-1.6955	-1.21149	-0.793589	-0.0852597	-0.850757	-2.06795	2.66292	FALSE	no hit
CRELD2	79174	-1.65907	-1.42615	-0.547389	-3.00366	-2.39102	-0.43857	-3.25914	-3.47534	-1.62317	-1.6301	-1.81926	-1.42015	-0.0651225	-0.927709	-2.01285	2.7452	FALSE	toxic
CRLF1	9244	-1.4287	-1.10993	-0.401465	-2.7747	-0.339253	0.0272216	-0.884932	-0.160049	-1.22416	-1.55511	-1.45547	-0.661897	0.110851	-1.3506	-1.84371	3.52687	TRUE	no hit
CRYZL1	9946	-0.89977	-0.599378	0.79652	-2.89645	-1.23254	0.232896	-1.76986	-2.16066	-0.788627	-0.489223	-0.663765	-1.21289	0.181462	-0.477949	-1.90395	2.92628	TRUE	no hit
CSN3	1448	-0.993385	-1.07091	0.206424	-2.11567	0.337143	0.595851	0.895724	-0.480146	-0.606146	-0.95485	-0.733095	-0.130494	0.470256	-0.516542	-1.59564	3.52295	TRUE	no hit
CST1	1469	-1.38234	-1.4284	-0.274895	-2.44372	-1.04705	0.00907387	-2.59004	-0.56017	-1.06624	-0.782799	-1.82223	-0.593689	0.386075	0.221051	-2.2414	3.17858	TRUE	no hit
CLEC17A	388512	0.937201	0.68334	0.486897	1.64137	-1.13658	-0.825722	-1.92095	-0.663059	0.720343	1.20417	0.192021	0.764837	-0.937799	0.615804	-0.978799	-2.4504	FALSE	no hit
CLIC1	1192	0.711062	0.903186	0.445762	0.784238	0.0843457	-0.305487	-0.550384	1.10891	0.618203	0.792598	0.864494	0.197517	-0.754691	-0.217973	-0.262447	-1.78365	FALSE	no hit
CLPTM1	1209	0.60476	0.463963	0.552465	0.797853	0.587248	0.00907387	0.518009	1.23466	-0.0745377	-0.105345	0.274788	-0.393056	-1.69903	-1.1136	-0.92093	-3.06256	FALSE	no hit
CMTM1	113540	0.197421	0.523344	0.364157	-0.295238	-1.95584	-0.698688	-2.09362	-3.07522	-0.778971	-0.200722	-0.94559	-1.1906	-1.86264	-1.20288	-1.92749	-2.45754	FALSE	no hit
CNGA3	1261	0.0750676	0.320231	0.359341	-0.454369	-0.945314	-0.365979	-1.33819	-1.13177	-0.839708	-0.329162	-1.13835	-1.05161	-1.77862	-1.3824	-2.06871	-1.88476	FALSE	no hit
CNPY4	245812	-0.0758694	-0.348597	0.377749	-0.25676	0.0833729	0.541407	-0.485633	0.194345	-0.232639	-0.436016	-0.00887316	-0.253029	-0.828531	-0.610902	-0.996219	-0.878471	FALSE	no hit
CNTNAP4	85445	-0.286674	-0.416871	0.236815	-0.679967	-0.453455	0.148206	-0.971267	-0.537306	-0.697482	-0.99085	-0.308747	-0.79285	-1.11926	-1.27363	-1.19808	-0.886078	FALSE	no hit
COL17A1	1308	-0.393468	-0.782659	0.174264	-0.57201	-0.125468	-0.111911	-0.744638	0.480146	-0.247318	-0.309867	-0.728407	0.296321	-0.229603	0.111159	-1.65253	0.852562	FALSE	no hit
COL2A1	1280	-0.442563	-0.664232	0.155964	-0.81942	-2.42735	-1.18263	-3.1728	-2.9266	-1.30682	-1.37888	-1.47743	-1.06414	-1.60752	-1.403	-2.23113	-1.18842	FALSE	no hit
COL6A5	256076	-0.354079	0.106587	-0.235772	-0.933053	-0.505964	0.214748	-1.24106	-0.491578	-0.266478	-0.79883	-0.632738	0.632134	-0.146657	-1.7109	-1.02064	2.29156	FALSE	no hit
COMP	1311	-0.255221	0.194451	0.745246	-1.70536	-1.13726	0.257093	-1.74828	-1.92058	-0.10119	-0.0327599	-0.352042	0.0812323	0.214326	-0.657447	-1.63246	2.93288	TRUE	no hit
CORO1A	11151	-0.43342	-0.158341	0.803258	-1.94518	-1.64259	-0.674491	-1.53244	-2.72083	-0.933153	-1.89369	-0.455596	-0.450176	-0.748976	-2.98744	-1.7664	2.50691	FALSE	no hit
COX7B	1349	0.195747	0.272422	1.4318	-1.11698	-0.796696	0.0151231	-1.27344	-1.13177	0.0488742	-0.316096	-0.0612514	0.52397	-0.214417	-1.17405	-1.83816	2.36895	FALSE	no hit
CPE	1363	-0.676441	-0.678997	0.507571	-1.8579	-3.04184	-1.73311	-3.34547	-4.04694	-1.54498	-2.2729	-0.797889	-1.56416	-1.59334	-2.82707	-1.84659	-0.106362	FALSE	toxic
CPPED1	55313	-0.314569	0.191073	0.36725	-1.50203	-0.964929	-0.214748	-1.65115	-1.02888	-0.779883	-0.561675	-1.02478	-0.753193	-0.91295	-1.39762	-2.03777	0.696533	FALSE	no hit
CRABP1	1381	-0.710937	-0.346016	0.843317	-2.63011	-1.10428	0.0393201	-1.30581	-2.04634	-1.37203	-1.92972	-0.397095	-1.78928	-1.16432	-2.78356	-1.74981	1.04043	FALSE	no hit
CRH	1392	-1.66099	-1.73345	-0.473186	-2.77632	-1.41681	-0.420422	-2.1152	-1.71481	-1.41	-1.81196	-1.64239	-0.775636	0.191429	-0.859662	-1.95591	3.38986	TRUE	no hit
CRNN	49860	-0.65031	-0.0554985	0.069127	-1.96456	-2.09498	-0.704737	-2.48213	-3.09808	-1.12885	-1.12659	-1.74584	-0.514122	-0.685875	-1.91357	-2.44992	2.30586	FALSE	no hit
CS	1431	-1.13575	-0.856742	0.313375	-2.86388	-1.90225	-0.529309	-2.71955	-2.45789	-1.40644	-1.34523	-1.56467	-1.30943	-0.355851	-1.31928	-2.42441	2.67614	FALSE	no hit
CSNK1A1	1452	-0.474536	-0.213505	0.538887	-1.74899	-4.90336	-2.34408	-6.03265	-6.33335	-2.1745	-2.36773	-2.09187	-2.06389	-2.65678	-3.64471	-3.09576	-1.22987	FALSE	toxic
CST11	140880	-0.865041	-0.576623	0.948659	-2.96716	-0.817415	0.662392	-1.26265	-1.85199	-0.293633	-0.35483	-0.0863224	-0.439748	0.994826	-0.16607	-1.47709	4.62763	TRUE	no hit
CLEC18A	348174	1.0168	0.625851	0.501046	1.92349	-1.18355	-1.11004	-1.64036	-0.800243	0.808911	0.440055	0.989638	0.99704	-0.989069	-0.301905	-0.157789	-2.50751	FALSE	no hit
CLIC3	9022	0.911969	0.574781	0.894853	1.26627	0.0626971	-0.184502	0.46405	-0.0914564	1.12005	1.46613	1.08985	0.804172	-0.264652	1.22249	-0.352479	-1.66397	FALSE	no hit
CLRN3	119467	-0.227441	-0.168121	-0.263607	-0.250594	0.155003	-0.0635171	-0.237421	0.765947	-0.715813	0.0408823	-0.702487	-1.48583	-1.67366	-0.106171	-1.22315	-3.69164	FALSE	no hit
CMTM2	146225	0.0684053	-0.863817	0.895318	0.173715	-1.09466	0.0635171	-1.76986	-1.57762	-0.155393	-0.847336	0.380856	0.000300807	-0.826379	-0.331797	-0.988854	-1.15849	FALSE	no hit
CNGA4	1262	-0.241321	-0.407698	0.750699	-1.06696	0.03902	0.251044	-0.0539593	-0.0800243	-0.760468	-1.18317	0.257705	-1.35594	-1.18764	-1.46471	-1.00206	-1.09616	FALSE	no hit
CNR1	1268	0.912792	0.536701	1.63911	0.56256	-0.0196425	0.323635	0.474841	-0.857404	-0.0194158	-0.466474	-0.191758	0.599985	-1.54321	-1.68856	-2.21871	-0.722348	FALSE	no hit
CNTNAP5	129684	-0.1532	-0.598847	0.372853	-0.233605	-1.0765	-0.456718	-1.62957	-1.1432	-0.97608	-1.11118	-1.49894	-0.31812	-1.5531	-1.23155	-2.46978	-0.957977	FALSE	no hit
COL18A1	80781	-0.568667	-1.9366	1.46638	-1.23578	-0.928277	-0.287339	-0.87414	-1.62335	-1.18968	-2.31926	-0.256191	-0.993588	-1.23534	-1.34871	-2.09203	-0.26528	FALSE	no hit
COL3A1	1281	-0.793016	-1.24123	0.170935	-1.30875	-0.763916	-0.0574678	-1.4569	-0.777379	-1.36203	-1.92932	-1.20406	-0.952705	-1.25194	-1.62119	-2.07361	-0.0610215	FALSE	no hit
COL6A6	131873	-0.257409	-0.567787	0.946729	-1.15117	0.428966	0.849919	-0.0431674	0.480146	-0.775412	-1.42935	-0.502949	-0.393938	-0.95884	-1.84976	-1.86617	0.839414	FALSE	no hit
COMT	1312	-0.198009	-0.0194692	0.985673	-1.56023	0.204323	0.771279	0.356131	-0.514442	-0.821298	-0.877318	-0.836014	-0.750561	-0.998906	-1.62817	-2.28935	0.920804	FALSE	no hit
CORO1B	57175	-0.281152	-0.228544	1.45068	-2.06559	-1.25381	0.668442	-2.79509	-1.63478	-0.505845	-0.759573	-0.391405	-0.366558	-0.176673	-1.21367	-2.11942	2.80307	FALSE	no hit
COX7C	1350	-0.613337	-0.407992	0.738484	-2.1705	-1.83927	-0.0695663	-2.20154	-3.2467	-1.35454	-1.12597	-1.35183	-1.5858	-1.20457	-1.50584	-2.60433	0.496463	FALSE	no hit
CPM	1368	-0.832527	-0.867439	1.25578	-2.88592	-2.10597	-0.0453693	-3.72319	-2.54935	-1.56467	-1.73116	-1.52277	-1.44008	-0.915424	-1.88046	-3.14096	2.27515	FALSE	no hit
CPQ	10404	-0.503714	-1.38811	1.54227	-1.6653	-0.583919	0.378078	-2.06124	-0.0685923	-0.913029	-1.9123	-1.04182	0.215029	-0.459965	-1.47482	-2.866	2.96092	FALSE	no hit
CRABP2	1382	0.157754	1.04332	1.42553	-1.99558	-0.740823	0.722885	-1.99649	-0.94886	-0.236114	-0.223489	-0.746415	0.261563	-0.199789	-1.95676	-2.44093	3.79833	FALSE	no hit
CRHBP	1393	-0.892715	-2.13733	1.34986	-1.89068	-1.02833	0.178453	-2.22312	-1.04032	-1.5441	-2.89269	-0.889693	-0.849925	-1.13848	-2.09005	-2.56646	1.24107	FALSE	no hit
CROCC	9696	-0.780576	-0.211014	1.1136	-3.24432	-1.49062	-1.69681	1.87778	-4.65284	0.829011	-0.870797	5.12925	-1.77142	1.53828	-1.20917	3.11594	2.70807	FALSE	no hit
CSAD	51380	0.437139	0.910632	2.49203	-2.09125	-2.53523	-1.17658	-3.01093	-3.41818	0.358966	0.328487	0.77903	-0.0306181	0.156445	-0.994738	-1.81873	3.2828	FALSE	toxic
CSNK1A1L	122011	-0.354264	-0.789915	1.19282	-1.4657	-2.46636	-1.04349	-2.70875	-3.64682	-1.05816	-1.50299	-1.06783	-0.603668	-1.12767	-1.79543	-2.6005	1.01293	FALSE	no hit
CST2	1470	-1.05943	-1.08549	0.700334	-2.79314	-0.956311	0.656343	-1.8562	-1.66908	-1.15742	-1.00871	-1.3855	-1.07806	-0.00182704	-0.59208	-2.53678	3.12338	FALSE	no hit
CLEC2A	387836	1.55875	1.54626	1.08807	2.04193	-0.130537	0.00302462	0.485633	-0.880268	1.07553	1.32568	0.982549	0.918371	-1.35403	-0.304315	-0.676789	-3.08097	FALSE	no hit
CLIC4	25932	1.237	0.580456	0.941787	2.18876	-0.594597	-0.771279	-1.04681	0.0342961	1.221	0.611257	0.803295	2.24844	-0.543388	-0.192489	-0.698126	-0.739549	FALSE	no hit
CLSTN1	22883	0.931217	0.195527	1.0375	1.56062	-1.42182	-0.807574	-2.02887	-1.42901	0.447154	1.1746	0.160763	0.0060993	-1.33242	0.985442	-1.33949	-3.64321	FALSE	no hit
CMTM3	123920	1.58911	-0.0911487	4.77446	0.0840219	-1.12315	0.365979	-1.97491	-1.76054	1.04597	0.453424	3.81167	-1.12719	-1.10709	0.39478	-0.622715	-3.09335	FALSE	no hit
CNGB1	1258	0.810908	0.330744	0.593561	1.50842	-1.10989	-0.299438	-1.14394	-1.88629	0.616027	0.459161	-0.235431	1.62435	-0.750733	-0.10055	-1.39754	-0.75411	FALSE	no hit
CNR2	1269	0.837315	-0.0287761	1.56802	0.972698	-1.07525	0.130059	-1.62957	-1.72624	0.311034	0.562471	0.556712	-0.18608	-1.33038	0.511915	-1.40538	-3.09768	FALSE	no hit
COASY	80347	0.749939	1.02655	1.22322	4.71775e-05	-0.302405	0.0998125	-0.561176	-0.44585	-0.0132459	0.679941	-0.00556467	-0.714114	-1.51096	-0.594936	-1.64139	-2.29656	FALSE	no hit
COL19A1	1310	-0.200977	-1.09019	1.49395	-1.0067	-0.860337	-0.220797	-1.06839	-1.29182	-0.640142	-1.30886	0.0396171	-0.651186	-0.945492	-0.960446	-1.86343	-0.0125995	FALSE	no hit
COL4A1	1282	0.197215	0.188005	0.483739	-0.0800998	-0.73175	-0.390176	-1.17631	-0.628763	-0.444079	-1.23368	-0.875566	0.777003	-1.1152	-2.29598	-1.90609	0.856478	FALSE	no hit
COL7A1	1294	0.072464	-0.189711	1.23972	-0.83262	-0.945931	-0.0393201	-1.00364	-1.79483	-0.072945	-0.141284	0.150087	-0.227638	-0.454409	-0.40403	-1.51055	0.551348	FALSE	no hit
COMTD1	118881	-0.520079	-0.959232	0.684427	-1.28543	-1.55778	-0.511161	-2.10441	-2.05777	-0.46659	-1.32476	-0.325155	0.250143	-0.0169131	-1.10948	-1.49948	2.55823	FALSE	no hit
CORT	1325	0.150006	0.511066	1.29914	-1.36019	-1.26711	-0.819673	-1.76986	-1.2118	-0.318222	-0.707779	-0.308512	0.0616238	-0.624719	-1.90767	-2.00269	2.0362	FALSE	no hit
COX8A	1351	-1.34617	-1.06835	0.395245	-3.36541	-2.69863	-1.25522	-3.01093	-3.82974	-1.44056	-1.5627	-0.586578	-2.1724	-0.389129	-1.4018	-1.59011	1.82453	FALSE	toxic
CPN1	1369	0.394646	0.533307	1.6014	-0.950772	-0.283764	0.414373	-0.248213	-1.01745	0.429414	0.169092	0.493245	0.625907	-0.00924786	-0.766275	-1.46372	2.20225	FALSE	no hit
CPS1	1373	-0.540193	-1.06634	1.57778	-2.13202	-0.389975	0.372029	-0.215837	-1.32612	-1.30933	-1.79067	-0.569138	-1.56819	-1.21758	-1.6036	-2.45811	0.408988	FALSE	no hit
CRAT	1384	-0.801461	-0.643038	0.282745	-2.04409	-2.71918	-1.0072	-3.5721	-3.57823	-1.85316	-2.13791	-1.96613	-1.45543	-1.6672	-2.61639	-2.87543	0.490224	FALSE	toxic
CRHR1	1394	0.0602113	0.426126	1.87073	-2.11622	-1.95806	-0.855968	-2.32025	-2.69796	-1.00042	-1.79383	-0.756518	-0.450903	-1.19304	-3.43943	-2.82102	2.68133	FALSE	no hit
CROT	54677	-0.943577	-1.60361	0.600295	-1.82741	-1.9416	-0.734983	-2.6548	-2.43503	-1.0599	-1.59772	-1.38897	-0.193003	-0.315614	-0.863749	-2.55106	2.46797	FALSE	no hit
CSE1L	1434	-1.25888	-0.926344	-0.0022704	-2.84804	-1.56216	-0.0393201	-2.60084	-2.04634	-1.20312	-0.851036	-1.75582	-1.0025	0.121217	-0.510911	-2.40502	3.27958	TRUE	no hit
CSNK1D	1453	-0.643592	-1.08649	0.994611	-1.83889	-1.07911	0.105862	-1.4569	-1.88629	-0.00400608	-0.87392	-0.108062	0.969963	1.11412	-0.270605	-1.54659	5.15956	TRUE	no hit
CST3	1471	-1.20735	-1.59237	0.696322	-2.72599	-0.693565	-0.450669	-2.00728	0.377258	-0.662471	-1.91204	-0.639278	0.563905	1.00499	-1.3098	-1.80784	6.13261	TRUE	no hit
CLEC2D	29121	0.060448	0.140861	-0.105977	0.14646	-1.31011	-1.04954	-1.54323	-1.33755	-0.1433	-0.0192862	-0.0918666	-0.318749	-0.95158	-0.446967	-0.708868	-1.6989	FALSE	no hit
CLIC5	53405	-0.0378689	-1.24997	0.0813239	1.05504	-2.34155	-1.07979	-2.30946	-3.63539	-1.30618	-1.91078	-0.690163	-1.3176	-2.79075	-1.66496	-1.44224	-5.26503	FALSE	no hit
CLSTN2	64084	-0.549999	-1.19223	-0.66033	0.20256	-1.94178	-1.40645	-1.82382	-2.59507	-1.20664	-1.17406	-1.42292	-1.02294	-1.67753	-0.516681	-1.53678	-2.97912	FALSE	no hit
CMTM4	146223	-0.530054	-0.895775	-0.397907	-0.29648	-0.699038	0.0756156	-1.33819	-0.834539	-1.12732	-1.16763	-1.34029	-0.874056	-1.37701	-0.909305	-1.68477	-1.53695	FALSE	no hit
CNGB3	54714	-0.289014	-0.870965	0.787948	-0.784024	-0.806506	-0.819673	-1.35977	-0.240073	-1.09942	-0.991581	-1.06156	-1.24511	-1.53875	-0.663706	-2.30855	-1.644	FALSE	no hit
CNTD1	124817	0.157749	-0.67897	0.639839	0.512377	-1.42097	-0.35993	-2.23391	-1.66908	-0.815223	-0.776099	-0.95582	-0.713752	-1.95233	-0.645559	-2.08777	-3.12368	FALSE	no hit
COBLL1	22837	-0.387749	-0.646718	-0.00843533	-0.508092	-0.984942	-0.698688	-0.895724	-1.36041	-1.56407	-2.29142	-1.17502	-1.22578	-2.34353	-2.96066	-1.89779	-2.17213	FALSE	no hit
COL1A1	1277	-1.1014	-1.11672	-0.29393	-1.89354	-2.69735	-1.76335	-3.16201	-3.16668	-2.50105	-3.04235	-2.34982	-2.11097	-2.31724	-3.40534	-2.68716	-0.859203	FALSE	toxic
COL4A2	1284	-0.792654	-1.16371	0.77809	-1.99234	-1.26526	-0.620048	0.345339	-3.52107	-1.90346	-2.48701	-0.236697	-2.98668	-2.27588	-2.70127	-1.50916	-2.6172	FALSE	no hit
COL8A1	1295	-1.17918	-1.47165	0.0186503	-2.08454	-0.27058	0.855968	-0.215837	-1.45187	-1.47498	-2.16809	-0.794992	-1.46186	-0.870615	-1.80183	-1.48766	0.677639	FALSE	no hit
COPA	1314	-3.10006	-3.3618	-1.6672	-4.27119	-6.18396	-3.18493	-7.2845	-8.08246	-4.11531	-3.93986	-3.41317	-4.99291	-2.19757	-2.06551	-2.69307	-1.83414	FALSE	toxic
COTL1	23406	-0.664239	-0.838327	0.806952	-1.96134	-1.29116	-0.226847	-1.73749	-1.90915	-1.5908	-2.43563	-0.596008	-1.74077	-1.52174	-2.88197	-1.53407	-0.149177	FALSE	no hit
CP	1356	-0.403795	0.0275175	0.715138	-1.95404	-0.89623	0.226847	-0.571968	-2.34357	-1.40639	-1.74636	-1.27376	-1.19907	-1.49668	-2.89436	-2.55392	0.958219	FALSE	no hit
CPN2	1370	-0.370641	-0.622561	1.25219	-1.74155	-1.57392	0.0211724	-2.9138	-1.82913	-1.14645	-1.68915	-0.997994	-0.752212	-1.10405	-2.06059	-2.56773	1.31615	FALSE	no hit
CPT1A	1374	-0.63356	-0.543564	0.301408	-1.65853	-0.93456	-0.12401	-1.07919	-1.60049	-1.86561	-2.54874	-2.45611	-0.591985	-1.83388	-3.4857	-3.3914	1.37544	FALSE	no hit
CRB1	23418	-0.911212	-1.59287	0.390987	-1.53175	-2.15474	-1.38225	-3.1728	-1.90915	-1.86183	-3.62097	-1.69944	-0.265078	-1.64985	-3.94918	-2.62832	1.62793	FALSE	no hit
CRHR2	1395	-0.424817	-0.0961747	0.94749	-2.12577	-0.48483	0.0151231	-2.7843	1.31469	-0.619912	-1.21237	-1.54235	0.894982	0.211429	-2.02791	-2.92564	5.58784	TRUE	no hit
CRP	1401	-1.32421	-2.18595	0.995458	-2.78215	-3.06709	-0.940658	-3.35627	-4.90435	-1.9187	-2.82885	-1.1051	-1.82214	-1.01351	-1.89597	-2.47668	1.33211	FALSE	toxic
CSF1	1435	-1.17988	-1.56655	0.319505	-2.29258	-1.25505	0.00907387	-1.89937	-1.87486	-1.44755	-1.8554	-1.85747	-0.629779	-0.435466	-1.2666	-2.76689	2.72709	FALSE	no hit
CSNK1E	1454	-1.59181	-1.49617	0.228581	-3.50784	-0.50035	0.347832	-1.20869	-0.640195	-1.4285	-2.05864	-1.21585	-1.01102	0.352992	-1.61546	-1.96401	4.63845	TRUE	no hit
CST4	1472	-2.37914	-2.5616	-0.818354	-3.75745	-4.40534	-2.03557	-5.59018	-5.59027	-1.82504	-2.33886	-2.00331	-1.13295	0.966853	-0.447772	-1.81119	5.15952	TRUE	toxic
CLEC3A	10143	0.0963099	0.0707105	-0.194726	0.412945	1.75649	-1.12213	-2.33104	8.72265	3.41269	2.15562	0.297691	7.78476	5.93727	2.9473	-0.333399	15.1979	FALSE	no hit
CLIC6	54102	-0.292552	-0.169699	-0.239574	-0.468382	-2.0221	-1.34596	-2.33104	-2.3893	-0.172043	-0.189613	-0.480652	0.154134	-0.233669	-0.196354	-1.01965	0.514997	FALSE	no hit
CLSTN3	9746	0.135602	-0.104419	-0.221199	0.732425	-2.28585	-1.46089	-2.49292	-2.90374	-0.803645	-0.271367	-0.547945	-1.59162	-2.17847	-0.405104	-1.07114	-5.05916	FALSE	no hit
CMTM5	116173	0.0828625	-0.849926	0.583315	0.515198	-1.57852	-0.989051	-1.40294	-2.34357	-0.87277	-1.25388	-0.631258	-0.733174	-2.01215	-1.07398	-1.71329	-3.24918	FALSE	no hit
CNKSR2	22866	0.989602	0.315218	1.12296	1.53063	-1.04044	-0.553506	-1.23027	-1.33755	0.352002	0.352671	-0.313439	1.01677	-1.19468	-0.175176	-1.85561	-1.55326	FALSE	no hit
CNTF	1270	0.235631	-0.325705	1.27302	-0.24042	-0.859279	-0.317585	-1.59719	-0.663059	-0.724859	-0.601672	-0.723798	-0.849108	-1.6667	-0.722705	-2.34465	-1.93273	FALSE	no hit
COCH	1690	-0.00887467	-0.132628	0.586202	-0.480198	-1.31087	-0.916461	-1.38136	-1.63478	-1.21986	-0.73436	-1.11694	-1.80828	-2.23919	-1.32817	-2.2587	-3.13071	FALSE	no hit
COL1A2	1278	-0.571983	-0.782506	-0.0143041	-0.919138	-3.54544	-1.74521	-5.06138	-3.82974	-1.58994	-1.01887	-1.57103	-2.17993	-2.03643	-0.902862	-2.12143	-3.08499	FALSE	toxic
COL4A3	1285	0.116431	-0.364734	0.844362	-0.130334	-0.302877	0.710786	-0.259004	-1.36041	-1.09065	-0.822697	-1.09265	-1.3566	-2.23945	-1.14595	-2.39954	-3.17287	FALSE	no hit
COL8A2	1296	-0.903053	-0.903505	0.245619	-2.05127	-4.75009	-2.9974	-5.52543	-5.72746	-2.2745	-2.49658	-1.73766	-2.58925	-2.20206	-2.81222	-2.4572	-1.33677	FALSE	toxic
COPG1	22820	-0.592532	-0.215502	0.390174	-1.95227	-3.39555	-0.698688	-4.05774	-5.43022	-1.20921	-0.603666	-1.10473	-1.91922	-1.18366	-0.924044	-2.04142	-0.585501	FALSE	toxic
COX15	1355	-0.353078	-0.875822	0.992444	-1.17586	-1.11006	0.341782	-1.88857	-1.7834	-1.54855	-1.72155	-1.0446	-1.87951	-2.19157	-1.87613	-2.41677	-2.28183	FALSE	no hit
CPA1	1357	-0.602505	-0.924341	0.163292	-1.04647	-2.83333	-0.904362	-3.38864	-4.20699	-1.54451	-2.41204	-1.40741	-0.814093	-1.69602	-2.67078	-2.17028	-0.247006	FALSE	toxic
CPNE1	8904	-0.635327	-0.887252	0.700156	-1.71888	-1.9164	-0.535358	-2.29866	-2.91517	-1.45519	-1.7211	-1.47115	-1.1733	-1.26278	-1.64513	-2.60104	0.457835	FALSE	no hit
CPT1B	1375	-0.587358	-0.86509	0.753826	-1.65081	-2.21087	-0.51721	-2.90301	-3.21241	-1.3769	-2.23409	-1.21805	-0.678568	-1.27122	-2.59293	-2.40911	1.18837	FALSE	no hit
CRB2	286204	-0.915722	-0.345057	0.521244	-2.92335	-2.59317	-0.35993	-3.65844	-3.76114	-1.73957	-1.47752	-1.65272	-2.08847	-1.13081	-2.00589	-2.67785	1.2913	FALSE	toxic
CRIM1	51232	-0.659389	-0.36448	0.332562	-1.94625	-2.99185	-1.32176	-3.94982	-3.70398	-1.57114	-2.2114	-1.51816	-0.983856	-1.45441	-3.26172	-2.38246	1.28095	FALSE	toxic
CRTAC1	55118	-0.830055	-1.5664	1.18413	-2.1079	-0.993467	-0.220797	-1.27344	-1.48617	-1.97062	-2.23707	-1.74752	-1.92729	-1.77249	-1.78029	-3.20342	-0.33377	FALSE	no hit
CSF1R	1436	-1.38279	-0.892823	-0.14984	-3.1057	-1.12568	0.11796	-1.40294	-2.09206	-1.73177	-2.01848	-2.02692	-1.14992	-0.202246	-2.28582	-2.54722	4.22631	FALSE	no hit
CSNK1G1	53944	-1.65628	-1.63377	-0.321352	-3.01372	-2.90388	-1.04349	-3.12964	-4.53852	-1.82208	-2.3091	-1.5357	-1.62143	-0.4554	-1.78336	-1.9911	2.40827	FALSE	toxic
CST5	1473	-1.47251	-1.70884	0.110729	-2.8194	-1.8249	-0.00907387	-3.06489	-2.40073	-0.929815	-1.72821	-1.23307	0.171827	0.983429	-0.799808	-1.99464	5.74474	TRUE	no hit
CLEC3B	7123	0.588373	0.637617	0.411202	0.716299	-2.89087	-1.33991	-3.38864	-3.94406	0.636142	1.05637	0.670125	0.181932	-0.442192	0.634414	-0.371072	-1.58992	FALSE	toxic
CLK1	1195	-0.0632498	-0.950453	-0.111136	0.871839	-2.13177	-0.989051	-2.33104	-3.07522	-0.339962	-0.710399	-0.519339	0.209852	-1.05149	-0.202354	-1.18291	-1.7692	FALSE	no hit
CLTC	1213	-1.79175	-2.53993	-1.18475	-1.65056	-2.17336	-1.76335	-1.91016	-2.84658	-2.16439	-2.79523	-1.61702	-2.08092	-1.36092	-1.35613	-1.39588	-1.33076	FALSE	no hit
CMTM6	54918	-0.437979	-1.31673	0.758164	-0.755374	-3.11713	-2.31384	-2.96776	-4.06981	-1.20024	-1.7333	-0.340528	-1.5269	-1.59777	-1.29165	-1.53719	-1.96445	FALSE	no hit
CNMD	11061	0.550337	-0.596809	1.12702	1.1208	-0.671458	-0.190551	-0.474841	-1.34898	-0.430219	-0.977571	-0.493723	0.180638	-1.94164	-1.03975	-2.02084	-2.76433	FALSE	no hit
CNTFR	1271	-0.19218	-1.61786	1.26055	-0.219231	-0.375059	-1.0072	1.02523	-1.1432	-0.297854	-1.03753	0.471977	-0.328012	-0.65655	0.183441	-1.22863	-0.924464	FALSE	no hit
COG3	83548	-0.591171	-0.537846	-0.016397	-1.21927	-1.80839	-1.00115	-3.08647	-1.33755	-1.67237	-1.76574	-2.02093	-1.23046	-1.77413	-2.25599	-2.55658	-0.509827	FALSE	no hit
COL20A1	57642	-0.508744	-1.06097	0.967136	-1.4324	-2.29985	-1.17658	-2.77351	-2.94947	-1.42204	-1.52721	-0.834557	-1.90436	-1.6795	-1.23505	-2.17657	-1.62687	FALSE	no hit
COL4A4	1286	-0.481022	-0.382813	0.489274	-1.54953	-1.55473	-0.892264	-1.35977	-2.41216	-1.36961	-1.4875	-1.50812	-1.11321	-1.37469	-1.88137	-2.55546	0.312768	FALSE	no hit
COL9A1	1297	-0.0412854	-0.966819	1.25509	-0.412122	-1.17504	-0.00907387	-1.24106	-2.27498	-0.952282	-1.3068	-0.527586	-1.02246	-1.63895	-0.88974	-2.13956	-1.88756	FALSE	no hit
COPS4	51138	0.688699	1.11399	2.18251	-1.2304	-1.85227	0.166354	-2.385	-3.33816	-0.544396	-0.322882	-0.539709	-0.770598	-1.53038	-2.11206	-2.83365	0.354571	FALSE	no hit
COX17	10063	-0.369497	-0.513447	0.839737	-1.43478	-2.57141	-1.04954	-3.08647	-3.57823	-1.33499	-1.91038	-1.20711	-0.887488	-1.55877	-2.54246	-2.48505	0.351194	FALSE	toxic
CPA2	1358	0.030764	0.405885	1.44853	-1.76213	-2.49203	-0.541407	-2.96776	-3.96692	-1.22963	-1.433	-1.03073	-1.22518	-1.6326	-2.89032	-2.76464	0.757175	FALSE	no hit
CPNE2	221184	0.137933	-0.581302	1.39092	-0.395815	-2.57388	-1.09189	-3.09726	-3.5325	-0.709205	-1.90896	-0.704166	0.485513	-1.30453	-2.36465	-2.3858	0.836859	FALSE	toxic
CPT1C	126129	0.377445	0.139688	2.30957	-1.31693	-2.33376	-0.728934	-2.76271	-3.50964	-0.742906	-1.2239	-0.521487	-0.483326	-1.42588	-2.35703	-2.85903	0.938417	FALSE	no hit
CRB3	92359	-1.46911	-1.55184	0.107138	-2.96262	-1.71709	-0.547457	-1.59719	-3.00663	-1.98796	-2.4512	-1.57898	-1.93368	-0.944755	-2.07864	-2.3149	1.55928	FALSE	no hit
CRIP2	1397	-0.761175	-0.981518	0.97385	-2.27586	-1.88379	-0.214748	-2.59004	-2.84658	-1.5868	-1.41939	-1.64007	-1.70095	-1.1783	-1.22624	-2.98706	0.678403	FALSE	no hit
CRTAM	56253	-0.950015	-1.50835	0.854041	-2.19574	-0.761286	-0.341782	-0.215837	-1.72624	-1.16769	-1.74754	-0.758012	-0.997518	-0.434292	-0.90925	-2.07444	1.68081	FALSE	no hit
CSF2	1437	-0.757706	-1.08699	1.22395	-2.41008	-0.317099	0.0998125	-1.35977	0.308665	-0.809194	-2.06032	-0.745075	0.377813	0.273877	-1.92092	-2.36163	5.10418	TRUE	no hit
CSNK1G2	1455	-0.69745	-1.60213	0.966625	-1.45684	-1.37463	0.148206	-3.33468	-0.937428	-0.777088	-1.55894	-0.901184	0.128856	-0.165739	-0.683485	-2.31901	2.50528	FALSE	no hit
CST6	1474	-1.6052	-0.917725	0.0511494	-3.94902	-0.514748	0.208699	0.0647511	-1.8177	-1.21147	-1.02419	-1.31055	-1.29967	0.761992	-0.786943	-2.02929	5.10221	TRUE	no hit
CLEC4A	50856	0.894573	0.466615	0.965086	1.25202	-2.01816	-0.662392	-2.76271	-2.62937	0.914072	1.51207	0.904895	0.325248	-0.525662	1.49767	-0.512779	-2.56188	FALSE	no hit
CLK2	1196	0.808705	0.696359	0.902255	0.8275	-3.18633	-1.08584	-3.82032	-4.65284	0.686156	1.70149	0.929858	-0.572882	-0.97502	1.18823	-0.493891	-3.6194	FALSE	toxic
CLTCL1	8218	0.357356	0.241476	0.322354	0.508238	-1.73602	-1.33991	-2.05045	-1.8177	-0.0983538	0.419535	-0.149921	-0.564676	-1.24277	0.190773	-1.12672	-2.79235	FALSE	no hit
CMTM7	112616	0.328554	0.254342	0.4954	0.235919	-0.912808	-0.396226	-1.56482	-0.777379	-0.195122	0.231133	-0.754939	-0.0615587	-1.15621	-0.196475	-1.80608	-1.46609	FALSE	no hit
CNN2	1265	-0.22459	-0.480556	0.532384	-0.725598	-2.19429	-1.18868	-3.69081	-1.70337	-0.600766	-0.18057	-0.647745	-0.973984	-0.87398	0.218051	-1.64379	-1.1962	FALSE	no hit
CNTLN	54875	-0.223211	-1.332	1.0099	-0.347539	-0.0866104	0.293388	1.42452	-1.97774	-0.220606	-0.146433	0.836642	-1.35203	-0.762205	1.12199	-0.746535	-2.66207	FALSE	no hit
COL10A1	1300	0.0313415	-0.792081	1.26644	-0.380333	-0.57185	-0.384127	-0.87414	-0.457282	-0.454982	-0.0572798	-1.10462	-0.203047	-0.869709	0.575435	-2.68492	-0.499638	FALSE	no hit
COL21A1	81578	-0.21547	-1.13685	1.18075	-0.690308	-1.40138	-0.12401	-2.33104	-1.7491	-0.98196	-0.956922	-1.13952	-0.849434	-1.27673	-0.391205	-2.72359	-0.715397	FALSE	no hit
COL4A5	1287	-0.337466	-1.11221	0.85145	-0.751642	-2.11288	-0.541407	-2.87063	-2.9266	-1.46678	-1.67445	-1.92375	-0.802155	-1.77956	-1.49667	-3.24535	-0.596648	FALSE	no hit
COL9A2	1298	0.282914	0.186549	1.2377	-0.575504	-1.46517	-0.692638	-2.33104	-1.37185	-0.673679	-0.456523	-1.49235	-0.0721604	-1.37741	-1.25753	-3.0579	0.183198	FALSE	no hit
COPS5	10987	-0.193238	-0.252559	1.02868	-1.35584	-0.993362	0.136108	-2.00728	-1.10891	-0.0835688	-0.260502	-0.213693	0.223489	0.130645	-0.395658	-1.65311	2.4407	TRUE	no hit
COX4I1	1327	-0.0569259	0.313449	1.40378	-1.88801	-1.11815	-0.00302462	-1.51086	-1.84056	-1.36218	-0.918789	-1.20417	-1.96358	-1.91742	-2.04708	-2.84385	-0.86134	FALSE	no hit
CPA3	1359	-0.20521	0.134238	0.88414	-1.63401	-2.31522	-1.10399	-2.89222	-2.94947	-1.28554	-1.64601	-1.53908	-0.671539	-1.50234	-2.86025	-2.87461	1.22784	FALSE	no hit
CPNE3	8895	-0.336282	-1.22472	1.92671	-1.71083	-0.937064	-0.0453693	-1.55403	-1.2118	-0.849333	-1.16773	-0.92771	-0.452562	-0.589703	-0.501576	-3.02539	1.75786	FALSE	no hit
CPT2	1376	-0.314142	-0.0594151	1.0967	-1.97971	-3.58874	-1.29756	-4.57575	-4.89292	-1.21062	-1.0978	-1.50283	-1.03124	-1.19156	-1.77649	-2.87193	1.07373	FALSE	toxic
CRBN	51185	-0.789352	-1.62287	2.0306	-2.77579	-2.33823	-1.72706	-0.669095	-4.61855	-1.17955	-1.19827	-0.00516424	-2.33523	-0.763575	-0.177993	-2.26025	0.147522	FALSE	no hit
CRISP1	167	-1.1515	-1.43883	0.349009	-2.36467	-2.19079	-0.656343	-2.79509	-3.12095	-1.51144	-1.63165	-1.21425	-1.68841	-0.858115	-1.03113	-2.23053	0.687317	FALSE	no hit
CRTAP	10491	-0.990259	-1.19641	0.672628	-2.447	-0.967427	0.12401	-1.40294	-1.62335	-0.942123	-1.55463	-0.933938	-0.337799	0.0626831	-1.19602	-2.16173	3.5458	TRUE	no hit
CSF2RB	1439	-0.492193	-0.555506	0.922699	-1.84377	-2.13971	-0.166354	-2.5145	-3.73828	-0.529056	0.272987	-0.966562	-0.893593	-0.141143	0.585145	-2.31287	1.3043	FALSE	no hit
CSNK1G3	1456	-0.863551	-1.01335	1.12195	-2.69925	-2.48624	-0.257093	-3.86348	-3.33816	-1.34491	-1.80153	-1.17527	-1.05792	-0.495814	-1.77996	-2.44849	2.74101	FALSE	toxic
CST7	8530	-1.08024	-0.350092	0.220408	-3.11104	-1.84105	-0.341782	-2.46054	-2.72083	-0.549235	-0.244505	-0.955674	-0.447526	1.04249	-0.326486	-1.73561	5.18955	TRUE	no hit
CLEC4C	170482	-0.110463	-1.65904	0.822782	0.504871	-4.82506	-3.54183	-4.35991	-6.57343	0.466574	-0.0369967	1.54236	-0.105647	0.275784	2.14843	0.200486	-1.52156	FALSE	toxic
CLK3	1198	0.833557	-0.0719899	0.445401	2.12726	-0.910268	-0.299438	-1.02523	-1.40614	0.384623	0.551842	0.149758	0.45227	-1.38569	0.702023	-0.925724	-3.93337	FALSE	no hit
CLU	1191	0.307723	0.00203099	0.69938	0.221758	-0.208838	-0.43857	-0.107919	-0.0800243	0.33677	0.900708	0.615491	-0.505888	-0.563725	1.0231	-0.716256	-1.99802	FALSE	no hit
CMTM8	152189	-0.586955	-1.4662	0.112481	-0.407149	-1.85278	-0.626097	-1.4569	-3.47534	-0.687531	-1.14423	-0.159821	-0.758545	-0.804257	-0.105482	-0.919766	-1.38752	FALSE	no hit
CNNM1	26507	-1.05447	-2.36148	0.389668	-1.1916	-3.89511	-2.09001	-3.98219	-5.61313	-1.45893	-1.75831	-0.921219	-1.69725	-1.00291	0.0156382	-1.81185	-1.21252	FALSE	toxic
CNTN1	1272	-0.173136	-1.09475	0.882027	-0.306685	-2.4002	-1.7936	-2.12599	-3.281	-1.38059	-1.45022	-1.29353	-1.39801	-2.20348	-1.01705	-2.60567	-2.98771	FALSE	no hit
COL11A1	1301	-0.363815	-2.14104	1.05526	-0.00566809	-1.60708	-0.765229	-2.35262	-1.70337	-1.05068	-1.58435	-1.19777	-0.369913	-1.32975	0.0420729	-2.58319	-1.44813	FALSE	no hit
COL22A1	169044	-0.477512	-0.946375	0.64456	-1.13072	-1.57947	-0.365979	-2.02887	-2.34357	-0.844546	-0.31708	-1.10705	-1.1095	-0.800307	0.386696	-2.20539	-0.582225	FALSE	no hit
COL4A6	1288	-0.0478848	-1.23807	1.86931	-0.774895	-0.88552	-0.6019	-1.20869	-0.845971	-0.186125	-0.789614	-0.202466	0.433705	-0.230326	-0.0590577	-2.22865	1.59673	FALSE	no hit
COL9A3	1299	0.0170697	-0.752798	1.7103	-0.906296	-0.9675	0.402275	-2.10441	-1.20036	-0.740659	-0.230639	-1.26219	-0.729149	-1.07398	0.547549	-3.19091	-0.578592	FALSE	no hit
COPS6	10980	-0.571583	-0.510247	0.119013	-1.32351	-3.96077	-2.07792	-5.08296	-4.72144	-1.07729	-1.501	-1.39733	-0.333549	-0.849992	-1.84139	-2.05173	1.34314	FALSE	toxic
COX5A	9377	-0.185614	-1.2454	1.6463	-0.957738	-1.89571	-0.0816648	-2.82747	-2.77799	-1.22808	-2.04934	-1.03007	-0.604822	-1.49957	-1.66959	-2.84941	0.0202783	FALSE	no hit
CPA4	51200	-0.537557	-0.374467	1.01239	-2.25059	-1.5634	0.154256	-3.12964	-1.71481	-1.59896	-2.00982	-1.71868	-1.06837	-1.42264	-2.87353	-3.11841	1.72401	FALSE	no hit
CPNE4	131034	0.862041	0.826954	2.30894	-0.549774	-0.71307	0.0211724	-0.58276	-1.57762	0.242483	0.121999	0.230009	0.375441	-0.785723	-1.033	-2.26862	0.944451	FALSE	no hit
CPVL	54504	-1.09392	-1.15658	0.468158	-2.59334	-3.15312	-1.61212	-3.19439	-4.65284	-1.49541	-2.64505	-1.02545	-0.81572	-0.641979	-2.96374	-2.01971	3.05751	FALSE	toxic
CREB1	1385	-1.67476	-2.40128	0.524975	-3.14797	-1.26787	-0.607949	-1.82382	-1.37185	-1.65895	-2.52439	-1.32322	-1.12923	0.0245955	-1.08867	-2.41116	3.57362	TRUE	no hit
CRISP2	7180	-0.808238	-0.798047	0.681349	-2.30802	0.217371	0.898313	-0.474841	0.228641	-0.625631	-0.450748	-1.23649	-0.189653	0.400715	-0.0530235	-2.40481	3.65998	TRUE	no hit
CRTC2	200186	-1.59056	-2.40116	0.758279	-3.1288	-3.99605	-1.46089	-4.84554	-5.68173	-1.63639	-2.48021	-1.34958	-1.07937	0.0420676	-1.11711	-2.57814	3.82145	TRUE	toxic
CSF3	1440	-1.99541	-1.8349	-0.970185	-3.18115	-4.58751	-2.31989	-5.79522	-5.64743	-2.30119	-2.92085	-2.59805	-1.38466	-0.610625	-2.40129	-2.46341	3.03282	FALSE	toxic
CSNK2A1	1457	-1.98311	-2.92606	0.0391035	-3.06238	-2.3059	-1.15238	-3.21597	-2.54935	-1.58836	-2.1846	-1.45436	-1.12614	0.425563	-0.0381204	-2.03383	3.34864	TRUE	no hit
CST8	10047	-0.452487	-0.277966	1.42813	-2.50762	-1.09313	0.232896	-2.46054	-1.05175	-0.035733	-0.951533	-0.551359	1.39569	1.33622	-1.34346	-2.28567	7.63778	TRUE	no hit
CLEC4E	26253	1.56727	2.21975	0.776075	1.70599	-0.366316	-0.299438	-0.205045	-0.594466	1.8187	2.51383	1.3477	1.59456	-0.146509	0.754194	-0.102087	-1.09163	FALSE	no hit
CLK4	57396	1.0855	-0.0940777	0.916345	2.43423	-1.64466	-0.83782	-2.06124	-2.0349	1.21817	1.25574	0.959805	1.43897	-0.476438	1.83667	-0.510569	-2.75541	FALSE	no hit
CLUL1	27098	0.973571	-0.150388	1.44032	1.63078	-1.77121	-0.75918	-2.62242	-1.93202	0.598907	0.144307	0.762729	0.889685	-0.991276	0.174706	-1.13108	-2.01746	FALSE	no hit
CMYA5	202333	0.618397	-0.0284797	1.15426	0.729414	0.382277	-0.0574678	2.43896	-1.23466	0.944666	-0.162918	2.69915	0.297769	-0.412683	-0.523316	0.896721	-1.61146	FALSE	no hit
CNNM2	54805	0.211465	0.00713723	1.57865	-0.951397	-1.0792	-0.656343	-1.00364	-1.57762	-0.739068	-0.467204	-0.0899427	-1.66006	-1.69803	-1.00644	-1.99464	-2.093	FALSE	no hit
CNTN2	6900	0.201808	-0.297097	0.880166	0.0223561	-2.23082	-0.650294	-3.36706	-2.6751	-0.454926	0.319234	-0.765878	-0.918133	-1.41378	0.514196	-2.10968	-2.64586	FALSE	no hit
COL11A2	1302	-0.337612	-0.900453	0.203559	-0.315941	-2.27492	-1.10399	-2.03966	-3.68112	-1.28983	-0.896426	-1.08672	-1.88633	-2.04709	-0.497054	-1.91209	-3.73212	FALSE	no hit
COL23A1	91522	-0.929589	-1.66205	0.620222	-1.74694	-0.8715	-0.52326	-0.399299	-1.69194	-1.61683	-1.73916	-1.0642	-2.04713	-1.39738	-0.749727	-2.07596	-1.36644	FALSE	no hit
COL5A1	1289	0.571074	0.16088	2.28936	-0.737019	-1.22159	-0.0151231	-2.07204	-1.57762	-0.0709274	0.0314366	0.588704	-0.832923	-1.1143	-0.539649	-1.8177	-0.985553	FALSE	no hit
COLEC10	10584	0.108241	-0.28357	0.973787	-0.365494	-1.22156	-0.311536	-1.86699	-1.48617	-0.734375	-0.290922	-0.89432	-1.01788	-1.59411	-0.414373	-2.17829	-2.18969	FALSE	no hit
COPS8	10920	-0.288524	-0.63732	1.689	-1.91725	-3.70456	-2.01742	-3.72319	-5.37306	-0.80667	-0.884378	0.0850885	-1.62072	-0.8019	-0.921501	-1.6599	0.175701	FALSE	toxic
COX5B	1329	-0.3822	-0.107127	0.912838	-1.95231	-1.15115	-0.1966	-1.37057	-1.88629	-1.31209	-1.72407	-1.27379	-0.938429	-1.25873	-2.65074	-2.57253	1.44708	FALSE	no hit
CPA5	93979	-0.318377	0.107052	1.24236	-2.30454	-2.43253	-0.892264	-3.60448	-2.80085	-1.193	-1.3863	-1.23463	-0.958066	-1.08407	-2.49852	-2.79855	2.04485	FALSE	no hit
CPNE5	57699	-0.907519	-1.15684	0.714316	-2.28003	-5.22709	-3.0216	-6.86362	-5.79605	-1.37427	-1.89952	-1.56733	-0.655957	-0.478736	-1.53465	-2.6578	2.75624	FALSE	toxic
CPXM1	56265	-0.916914	-1.25074	0.559034	-2.05904	-1.68496	-0.716835	-2.22312	-2.11493	-0.909436	-1.28722	-1.06023	-0.380852	-0.0226881	-0.706662	-2.16082	2.79942	FALSE	no hit
CREB3L1	90993	0.165601	0.251278	1.09304	-0.847513	-1.81966	-0.783377	-1.54323	-3.13238	-0.245846	-0.440015	-0.999313	0.701791	-0.5352	-1.29117	-2.47264	2.15821	FALSE	no hit
CRISP3	10321	-1.20611	-1.01233	0.33215	-2.93816	-1.94927	-0.462767	-2.88142	-2.50362	-1.19265	-1.53238	-1.39806	-0.647501	0.110476	-1.42832	-2.34221	4.10196	TRUE	no hit
CRY2	1408	-1.20266	-1.3292	0.547931	-2.8267	-2.69679	-1.24917	-3.19439	-3.64682	-1.69855	-1.92677	-1.7466	-1.42228	-0.697533	-1.52344	-2.72779	2.15863	FALSE	toxic
CSF3R	1441	1.7615	2.02876	4.06171	-0.805966	-1.46439	0.0937633	-1.64036	-2.84658	2.303	2.23698	2.20478	2.46724	1.50376	0.438119	-1.63358	5.70674	FALSE	no hit
CSNK2A2	1459	-1.36709	-1.40768	0.0976252	-2.79121	-3.13753	-0.92251	-4.30595	-4.18413	-1.25387	-1.36343	-1.56499	-0.833204	0.165212	-0.643437	-2.27649	3.41556	TRUE	toxic
CST9	128822	-1.72528	-1.95829	0.117467	-3.335	-0.814747	0.178453	-2.03966	-0.583034	-0.684501	-1.16857	-0.221283	-0.663649	1.52245	0.417559	-0.968404	5.11819	TRUE	no hit
CLEC4M	10332	-0.703164	-2.33034	-0.469622	0.690465	-5.65577	-4.2375	-6.25927	-6.47054	-0.743779	-1.73822	-0.192254	-0.300859	-0.752137	0.505603	-0.563682	-2.19833	FALSE	toxic
CLMP	79827	0.429037	-0.580094	1.20188	0.66532	-1.6521	-0.807574	-2.33104	-1.8177	-0.167227	-0.576377	0.273459	-0.198763	-1.32683	-0.376604	-1.38336	-2.22054	FALSE	no hit
CMA1	1215	0.0754015	-0.0575682	0.0367665	0.247006	-2.11757	-1.08584	-2.94618	-2.32071	-0.763327	-0.722666	-0.358242	-1.20907	-1.88348	-1.14659	-0.998701	-3.50514	FALSE	no hit
CNDP1	84735	0.301609	-0.131624	0.492812	0.543639	0.0496318	2.48926	-0.0539593	-2.28641	1.20713	4.27601	-0.124152	-0.530458	1.12305	7.42495	-1.174	-2.88179	FALSE	no hit
CNNM4	26504	-0.436488	-0.292753	-0.214506	-0.802205	-1.33565	3.17283	-3.07568	-4.1041	0.0533515	3.87771	-1.64398	-2.07368	0.0804594	5.39362	-2.08101	-3.07124	FALSE	toxic
CNTN4	152330	-0.125504	-0.60627	0.514334	-0.284575	-1.70805	-0.734983	-2.90301	-1.48617	-0.891593	-1.16411	-1.01294	-0.497727	-1.4974	-1.26902	-2.10852	-1.11466	FALSE	no hit
COL12A1	1303	-0.247754	-1.35763	0.486838	0.127527	-1.18765	-0.668442	-0.733846	-2.16066	-1.16627	-1.42613	-1.31288	-0.75981	-1.81321	-0.740255	-2.34126	-2.35811	FALSE	no hit
COL24A1	255631	0.0143572	-0.741972	1.10548	-0.320434	-2.1062	-1.12818	-2.1152	-3.07522	-0.908138	-1.27805	-1.13109	-0.315271	-1.5741	-1.35807	-2.58787	-0.776359	FALSE	no hit
COL5A2	1290	0.368089	0.015015	2.07841	-0.98916	-1.80256	-0.989051	-2.40658	-2.01204	-1.16175	-0.820097	-0.623437	-2.04171	-2.34114	-1.57194	-2.80267	-2.64881	FALSE	no hit
COLEC11	78989	0.0720833	-0.516415	1.40569	-0.673029	-1.33383	0.208699	-2.644	-1.56619	-0.753838	-0.642506	-1.29159	-0.327419	-1.14286	-0.504682	-2.95034	0.026444	FALSE	no hit
COQ6	51004	-0.764053	-1.85504	0.832148	-1.26927	-2.89959	-1.17658	-4.2412	-3.281	-0.379943	-1.2547	-0.468468	0.583339	0.537911	0.306397	-1.73514	3.04248	TRUE	toxic
COX6A2	1339	-0.4277	-1.14035	1.43936	-1.5821	-2.61572	-0.855968	-2.97855	-4.01265	-1.35826	-1.50505	-1.17715	-1.39259	-1.44907	-1.16578	-2.80815	-0.373278	FALSE	no hit
CPA6	57094	-0.578634	-0.639369	0.799582	-1.89611	-1.96568	-0.595851	-2.94618	-2.355	-1.35271	-1.44598	-1.35097	-1.26117	-1.13719	-1.58725	-2.58651	0.762193	FALSE	no hit
CPNE6	9362	-0.569364	-0.416449	0.531046	-1.82269	-3.33952	-1.8057	-3.58289	-4.62998	-1.25469	-1.42896	-1.48889	-0.846219	-0.954233	-1.76734	-2.52014	1.42478	FALSE	toxic
CPXM2	119587	-0.614272	-0.85338	0.797296	-1.78673	-1.66868	-0.166354	-2.43896	-2.40073	-2.06313	-2.24952	-2.00085	-1.93901	-2.29039	-2.56191	-3.21558	-1.09369	FALSE	no hit
CREB5	9586	-0.660007	-0.361001	0.767032	-2.38605	-3.02449	-1.3883	-3.42102	-4.26415	-1.40122	-1.80282	-1.10743	-1.2934	-1.05626	-2.55373	-2.32883	1.7138	FALSE	toxic
CRISPLD1	83690	-1.15135	-1.10769	0.551214	-2.89758	-2.56137	-0.559555	-3.0433	-4.08124	-1.23965	-0.619449	-1.36477	-1.73475	-0.110637	0.0821944	-2.44467	2.03056	FALSE	toxic
CRYAB	1410	-1.21993	-1.34042	0.501516	-2.82087	-1.30416	-0.541407	-1.56482	-1.80626	-0.814205	-1.24568	-0.682155	-0.514778	0.640706	-0.521594	-1.70587	4.14958	TRUE	no hit
CSHL1	1444	-2.08151	-2.11479	-1.00507	-3.12467	-4.6784	-1.91459	-5.15851	-6.96212	-2.21978	-2.06515	-2.36374	-2.23044	-0.497512	-0.819225	-2.14516	1.47185	FALSE	toxic
CSNK2B	1460	-1.65968	-2.83409	0.370158	-2.51509	-2.94237	-0.898313	-3.93903	-3.98978	-1.49624	-1.91368	-0.642531	-1.93251	-0.112006	0.378437	-1.53129	0.816831	FALSE	toxic
CST9L	128821	-1.38942	-2.17769	1.03278	-3.02335	-2.41129	-0.432521	-2.90301	-3.89833	-0.803653	-0.846869	-0.65771	-0.906382	1.02916	1.17746	-2.0869	3.99691	TRUE	no hit
CLEC5A	23601	1.22163	1.29482	0.421188	1.94888	-1.1158	-0.84387	-2.89222	0.38869	1.87136	2.05788	0.735004	2.82119	0.522856	1.18155	-0.367283	0.754302	FALSE	no hit
CLN5	1203	-0.175916	-0.497012	-0.711555	0.680818	-2.54727	-1.68471	-3.25914	-2.69796	-0.175332	-0.147857	-0.172878	-0.205259	-0.673139	0.17696	-0.315349	-1.88103	FALSE	no hit
CMAS	55907	-0.0536087	-0.579177	-0.0925385	0.51089	-4.41321	-2.54371	-4.12249	-6.57343	-0.507125	-0.201285	-0.453333	-0.866756	-1.35464	0.233832	-1.1016	-3.19616	FALSE	toxic
CNDP2	55748	0.0782265	0.288466	0.0871261	-0.140912	-2.80036	-1.60003	-3.48577	-3.31529	-0.513968	0.0364816	-0.624917	-0.953468	-1.34433	-0.447375	-1.32556	-2.26004	FALSE	toxic
CNOT1	23019	-0.209821	-0.71279	0.341744	-0.258418	-1.75179	-0.595851	-2.00728	-2.65223	-0.69029	-0.606997	-0.266316	-1.19756	-1.34692	-0.371515	-1.20029	-2.46895	FALSE	no hit
CNTNAP1	8506	0.689826	-0.0360336	1.25587	0.849645	-1.05957	-0.493013	-1.74828	-0.937428	0.390408	0.252941	0.168854	0.749429	-0.84875	0.00208327	-1.56167	-0.986668	FALSE	no hit
COL13A1	1305	0.372166	-0.435375	1.20739	0.344487	-1.96735	-1.56373	-1.64036	-2.69796	-0.566128	-0.718866	-0.220461	-0.759056	-1.91304	-0.922218	-1.78738	-3.02952	FALSE	no hit
COL25A1	84570	-0.316513	-0.394046	0.494555	-1.05005	-3.24678	-1.96298	-3.21597	-4.56139	-0.844692	-0.243509	-1.16556	-1.12501	-0.901753	-0.122182	-2.17659	-0.406487	FALSE	toxic
COL5A3	50509	-0.0359366	-0.204274	0.602953	-0.506489	-2.23761	-1.3641	-1.75907	-3.58966	-1.13234	-0.0730534	-1.23735	-2.08663	-2.0965	-0.207387	-2.28047	-3.80164	FALSE	no hit
COLEC12	81035	0.556928	-0.756137	1.5684	0.858525	-0.497812	0.105862	-1.17631	-0.422986	-0.269823	0.0685105	-0.75846	-0.119518	-1.5558	0.68823	-2.5176	-2.83804	FALSE	no hit
COQ7	10229	-0.512936	-0.636549	1.0844	-1.98666	-3.43372	-1.54558	-4.26278	-4.49279	-0.913613	0.00735104	-0.93895	-1.80924	-0.73803	0.577194	-2.3216	-0.46968	FALSE	toxic
COX6B1	1340	-0.472382	-1.68822	0.864566	-0.593497	-2.33541	-0.862017	-2.41737	-3.72685	-1.21922	-1.36884	-0.82501	-1.46381	-1.61652	-0.264305	-2.15028	-2.43497	FALSE	no hit
CPAMD8	27151	-0.241319	-0.0838554	0.293685	-0.933788	-1.28842	-0.0211724	-1.87778	-1.96631	-0.772973	-0.0980911	-1.06513	-1.1557	-0.947952	0.219119	-1.92691	-1.13606	FALSE	no hit
CPNE7	27132	0.0245853	-0.810006	1.03993	-0.15617	-1.11469	-1.28546	-2.29866	0.240073	-0.233477	-1.42577	-0.65363	1.37897	-0.507149	-1.56522	-2.10455	2.14833	FALSE	no hit
CPZ	8532	-0.657559	-1.05255	0.410648	-1.33078	-2.43635	-0.35993	-3.30231	-3.64682	-1.41383	-1.02694	-1.79967	-1.41489	-1.44687	-0.744723	-2.70802	-0.887858	FALSE	toxic
CREBBP	1387	0.0723882	0.0872219	1.28808	-1.15814	-1.91025	-0.214748	-2.60084	-2.91517	-1.0066	-1.24521	-1.66965	-0.104931	-1.49935	-2.40555	-3.23819	1.14571	FALSE	no hit
CRISPLD2	83716	-1.65985	-1.83239	-0.163332	-2.98382	-4.83401	-2.2231	-6.15136	-6.12758	-1.74356	-1.69783	-2.0132	-1.51966	-0.104127	-0.410985	-2.44875	2.54735	FALSE	toxic
CRYL1	51084	-1.15737	-1.29339	-0.126636	-2.05208	-1.95558	-0.75918	-2.74113	-2.36643	-1.47671	-1.70509	-1.56099	-1.16404	-0.707103	-1.28827	-2.01807	1.18504	FALSE	no hit
CSK	1445	-0.13049	0.365734	1.02276	-1.77996	0.566834	0.952756	0.884932	-0.137185	-0.310415	-0.153524	-0.361347	-0.416373	-0.320993	-1.08179	-1.86508	1.98389	FALSE	no hit
CSPG4	1464	-1.33619	-1.28197	0.324064	-3.05066	-1.96953	-0.444619	-2.5145	-2.94947	-0.77716	0.480306	-0.962452	-1.84933	0.677317	1.95186	-1.85485	1.93494	TRUE	no hit
CSTA	1475	-1.64029	-1.84745	-0.599702	-2.4737	-2.17763	-0.789426	-2.42817	-3.31529	-1.01874	-0.75055	-0.835949	-1.46971	0.452647	0.790341	-1.01024	1.57784	TRUE	no hit
CLEC6A	93978	-0.297526	-1.15856	-0.458145	0.724128	-2.40273	-1.88434	-1.9857	-3.33816	-0.0594513	-0.270163	-0.000797411	0.0926063	-0.45079	0.870099	-0.326976	-1.89549	FALSE	no hit
CLPP	8192	-0.084586	-0.721199	0.406507	0.0609338	-3.49663	-2.24125	-4.52179	-3.72685	-0.891604	-0.851861	-0.776561	-1.04639	-1.64393	-0.543859	-1.76465	-2.62329	FALSE	toxic
CMBL	134147	-0.103355	-0.516112	-0.399736	0.605783	-2.59296	-1.88434	-2.57925	-3.31529	-1.0726	-1.59661	-1.19353	-0.427649	-2.12061	-1.9631	-1.57656	-2.82218	FALSE	no hit
CNFN	84518	-0.451525	-0.172437	-0.885421	-0.296717	-2.76745	-1.18868	-3.22676	-3.8869	-1.11621	-0.831694	-1.81639	-0.700538	-1.48506	-1.30358	-1.7614	-1.39021	FALSE	toxic
CNOT6	57472	-0.122124	-0.529812	-0.129738	0.293177	-2.71746	-1.8299	-2.88142	-3.44105	-0.649307	-1.65941	-0.877266	0.588754	-1.16842	-1.99004	-1.37059	-0.144647	FALSE	no hit
CNTNAP2	26047	-0.853383	-1.17543	-0.659493	-0.72523	-4.21289	-2.76148	-4.2412	-5.636	-1.55514	-1.91949	-1.53429	-1.21163	-1.50834	-1.73655	-1.62969	-1.15877	FALSE	toxic
COL14A1	7373	-0.0520305	-0.139361	0.485114	-0.501845	-3.11998	-1.39435	-4.09011	-3.87546	-1.2989	-1.27364	-1.20632	-1.41674	-2.16142	-2.07551	-2.11711	-2.29164	FALSE	toxic
COL26A1	136227	-1.22366	-1.5864	-0.433824	-1.65076	-4.619	-2.73123	-4.39228	-6.73348	-1.7362	-1.8316	-1.86487	-1.51213	-0.983765	-0.859135	-2.18018	0.0880261	FALSE	toxic
COL6A1	1291	-1.02623	-1.06147	0.628057	-2.64528	-2.8237	-0.650294	-2.67638	-5.14442	-2.37048	-1.85986	-1.82773	-3.42385	-2.15773	-1.79307	-2.88812	-1.79202	FALSE	no hit
COLQ	8292	-0.307246	-1.06885	1.36286	-1.21574	-1.92885	-1.73916	-0.377715	-3.66969	-1.26315	-1.77353	-0.397039	-1.61889	-1.60331	-1.53872	-2.059	-1.21221	FALSE	no hit
COQ8A	56997	-1.76146	-2.02639	-0.838302	-2.4197	-3.5765	-1.94483	-4.54337	-4.24129	-1.56752	-2.03821	-1.76072	-0.903632	-0.00890903	-0.819915	-1.73348	2.52667	FALSE	toxic
COX6C	1345	-1.47498	-1.79064	-0.633639	-2.00066	-3.52811	-1.72101	-4.75921	-4.1041	-2.3388	-2.32644	-2.91216	-1.77779	-1.60312	-1.55709	-3.03909	-0.213187	FALSE	toxic
CPB1	1360	-0.697169	-1.67762	0.913753	-1.32764	-2.45965	-0.831771	-3.14043	-3.40675	-1.93069	-2.50435	-1.48756	-1.80016	-2.15121	-1.94994	-2.81477	-1.68893	FALSE	toxic
CPNE8	144402	-1.94751	-2.22501	-1.06116	-2.55636	-4.84844	-2.73728	-6.76649	-5.04153	-2.5901	-2.14625	-2.91984	-2.70421	-1.35544	-0.705784	-2.73683	-0.623712	FALSE	toxic
CR1	1378	-1.20423	-2.166	1.17461	-2.62129	-3.64852	-1.53953	-4.09011	-5.3159	-2.29253	-2.74659	-2.13451	-1.9965	-1.50646	-1.67858	-3.59344	0.752651	FALSE	toxic
CREG1	8804	-2.04919	-2.10835	-0.214613	-3.82461	-4.99284	-2.77358	-5.47147	-6.73348	-2.74546	-2.76956	-2.53105	-2.93575	-0.981475	-1.61688	-2.90024	1.5727	FALSE	toxic
CRK	1398	-2.75692	-2.4364	-1.24995	-4.58441	-6.31206	-3.73541	-8.15864	-7.04214	-3.70434	-3.60378	-3.2146	-4.29464	-1.75349	-2.57352	-2.78069	0.0937367	FALSE	toxic
CRYM	1428	-1.45583	-1.58699	0.0332037	-2.81371	-2.26118	-0.734983	-3.25914	-2.78942	-1.54177	-1.8255	-1.37319	-1.42663	-0.267224	-0.916869	-2.08531	2.20051	FALSE	no hit
CSN1S1	1446	-1.53027	-1.64237	0.0242589	-2.9727	-2.04226	-0.52326	-2.85984	-2.74369	-2.1717	-2.14717	-2.10274	-2.26518	-1.16871	-1.62448	-2.73152	0.849857	FALSE	no hit
CSPG5	10675	-1.89495	-2.14233	-0.44532	-3.09721	-3.31161	-1.23102	-4.94267	-3.76114	-1.53632	-2.41648	-0.584643	-1.60784	0.0850764	-1.31199	-1.02758	2.5948	TRUE	toxic
CSTB	1476	-1.54687	-1.87937	-0.137737	-2.62351	-3.86941	-0.698688	-4.95346	-5.9561	-1.61321	-1.83819	-1.56988	-1.43154	-0.263959	-0.700402	-2.06463	1.97316	FALSE	toxic
CSTL1	128817	0.346065	-0.701536	0.855547	0.884185	-1.14668	-1.66093	-1.42526	-0.353831	0.234531	-0.123182	0.21791	0.608864	0.069087	-0.0187015	-0.195294	0.421257	FALSE	no hit
CTPS1	1503	0.888738	-0.814004	2.74633	0.733885	-1.78395	-1.77897	-1.77054	-1.80233	0.258989	0.336271	0.0214107	0.419286	-0.439674	0.459901	-2.00882	0.229896	FALSE	no hit
CTSO	1519	-0.235897	-0.0268639	-0.116124	-0.564704	-1.49217	-3.36402	-0.172638	-0.939864	0.119101	0.044745	-0.115625	0.428184	0.1613	-0.270457	-0.458111	1.21247	FALSE	no hit
CX3CR1	1524	0.84585	-0.293548	4.24496	-1.41386	-0.344738	-0.716646	-0.0521927	-0.265373	0.200307	0.23846	0.837507	-0.475046	-0.473504	-0.016713	-1.28378	-0.120017	FALSE	no hit
CXCL8	3576	-0.682373	-0.111065	-1.59032	-0.345739	-0.284243	-1.10448	0.373379	-0.121629	-0.707289	-1.26553	-0.847338	-0.00900115	-0.792774	-1.31873	-1.08852	0.0289334	FALSE	no hit
CYB5R4	51167	-1.52264	-1.19909	-2.30856	-1.06028	-0.683835	0.598611	-0.405497	-2.24462	-0.688726	-0.921412	-1.01524	-0.129529	-0.377146	-0.276744	-1.25144	0.396743	FALSE	no hit
CYP19A1	1588	-3.14938	-1.48114	-4.83169	-3.13532	-3.32058	-4.25772	-2.36473	-3.33928	-1.93251	-2.17551	-2.6351	-0.986914	-1.45442	-1.1954	-3.21603	0.0481729	FALSE	toxic
CYP2A6	1548	-0.890001	0.950466	-2.27987	-1.3406	-0.976724	-1.77897	-0.509883	-0.641319	-1.08119	-1.18672	-2.04463	-0.0122116	-1.49395	-1.83702	-3.43818	0.793362	FALSE	no hit
CYP2W1	54905	-5.06069	0.305718	-13.5136	-1.97416	-1.49953	-1.61035	-1.15226	-1.73598	-1.07375	-1.13819	-1.71481	-0.368259	1.64447	-1.46423	6.00174	0.395902	TRUE	no hit
CYP4F3	4051	-0.504023	1.39072	-1.01884	-1.88395	0.511776	1.71152	0.188697	-0.364888	-0.5133	0.556742	-1.71819	-0.378455	-1.34902	-0.80597	-3.6861	0.445013	FALSE	no hit
CYSTM1	84418	-0.51964	2.50103	-1.7666	-2.29334	-1.75769	-1.5429	-0.766832	-2.96334	-1.01415	0.00479989	-2.50767	-0.539564	-2.12825	-1.92268	-4.97338	0.511311	FALSE	no hit
DAPK2	23604	-0.237308	1.41787	-0.618974	-1.51082	-0.0977314	0.868407	-0.277023	-0.884578	-0.882035	-0.492015	-1.51476	-0.639328	-1.82566	-1.62	-3.44151	-0.415474	FALSE	no hit
DCK	1633	-1.69479	-1.21761	-2.24976	-1.61701	-2.93213	-3.93734	-2.08369	-2.77536	-1.73363	-2.53365	-2.64968	-0.0175716	-1.79544	-1.22183	-5.08465	0.920144	FALSE	no hit
DDB1	1642	-2.15493	0.604285	-4.1247	-2.94438	-2.98121	-3.02678	-2.53336	-3.38351	-1.46946	-0.820079	-2.92248	-0.665833	-1.66624	-1.3428	-4.19162	0.535692	FALSE	toxic
DDX5	1655	-7.06867	-3.37302	-10.8188	-7.01423	-4.87133	-6.53413	-3.33632	-4.74355	-5.05347	-5.98579	-6.46584	-2.70876	-3.98204	-2.918	-8.35059	-0.677525	FALSE	toxic
DEFB115	245929	-1.58705	1.31756	-1.19289	-4.8858	-1.25472	-0.716646	-0.847128	-2.20039	-1.3023	-0.807363	-2.06766	-1.03189	-1.61008	-1.78662	-4.3096	1.26597	FALSE	no hit
DEFB134	613211	-1.37578	0.705184	-1.71044	-3.12208	-0.138125	0.429988	-0.00401483	-0.840349	-1.09064	-1.22176	-1.90667	-0.143475	-1.25119	-1.86821	-3.58045	1.69509	FALSE	no hit
DHFR	1719	-3.46923	1.01754	-7.48711	-3.93811	-1.36213	-2.20053	-0.614268	-1.27158	-1.71663	-0.939896	-3.71864	-0.491357	-1.29091	-1.6892	-3.78695	1.60343	FALSE	no hit
DHRS7B	25979	-2.35851	0.11971	-2.2617	-4.93354	-2.65874	-3.80244	-1.23255	-2.94122	-2.08725	-2.6335	-2.57994	-1.04832	-2.11871	-2.61926	-4.87369	1.13681	FALSE	no hit
DKK2	27123	-2.0635	1.03125	-2.84852	-4.37324	-1.68454	-2.52091	-0.277023	-2.25567	-1.58159	-2.09235	-2.15962	-0.492795	-1.45486	-2.74753	-3.51725	1.9002	FALSE	no hit
DMC1	11144	-0.996619	0.864376	0.320194	-4.17443	-0.164364	-0.0758802	0.710624	-1.12784	-1.51654	-1.9694	-2.24756	-0.332656	-2.04913	-2.48715	-5.76333	2.10309	FALSE	no hit
CTBP1	1487	-1.19967	-1.48105	-0.755008	-1.36295	0.032406	1.86328	-0.726683	-1.03938	-0.38753	0.39825	-0.722439	-0.838402	-0.437424	0.915344	-1.35372	-0.873898	FALSE	no hit
CTRB1	1504	-2.04755	-1.43093	-2.35481	-2.35689	-5.63765	-7.83252	-3.76189	-5.31853	-1.37028	-1.25907	-1.71115	-1.14063	-1.09085	-0.386354	-2.28618	-0.600002	FALSE	toxic
CTSS	1520	-1.44861	-1.98979	-0.978704	-1.37735	-2.29409	-2.68953	-2.0034	-2.18933	-0.700191	-0.180571	-1.27252	-0.647478	-0.668685	0.806698	-2.30925	-0.503502	FALSE	no hit
CXADR	1525	-1.26298	0.174022	-3.5841	-0.378873	0.296647	0.548024	0.57412	-0.232202	-0.565586	-0.230075	-1.65814	0.191456	-0.673281	-0.632783	-1.75317	0.366111	FALSE	no hit
CXCL9	4283	-1.33432	-0.792276	-1.30188	-1.9088	-1.24824	-0.952718	-0.967573	-1.82444	-0.618385	-0.727254	-1.26391	0.136009	-0.480487	-0.428772	-2.44762	1.43493	FALSE	no hit
CYB5RL	606495	-2.85935	-1.85524	-3.36717	-3.35564	1.17831	2.31856	0.630328	0.586033	-1.17449	-1.46924	-1.53707	-0.517173	-0.270377	-0.376689	-1.54548	1.11104	FALSE	no hit
CYP1A1	1543	-3.82081	-2.57684	-4.76933	-4.11626	-1.1906	-1.34055	-0.871217	-1.36004	-1.92091	-2.71609	-1.9843	-1.06233	-0.69134	-0.885154	-1.67073	0.481866	FALSE	<-3 in 2 replicates | <-2 in all replicates
CYP2A7	1549	-2.01793	-1.25487	-1.55755	-3.24136	0.3244	0.29509	0.268993	0.409117	-1.87669	-2.7857	-1.61558	-1.2288	-1.75052	-1.83816	-3.03366	-0.379727	FALSE	no hit
CYP39A1	51302	-4.5852	-1.53098	-8.23145	-3.99316	-0.789659	-0.885269	0.0200741	-1.50378	-2.0424	-2.4475	-2.56491	-1.11478	-0.60412	-1.45907	-0.667628	0.314337	FALSE	no hit
CYP4F8	11283	-1.29492	0.200646	-1.83055	-2.25486	-0.264542	0.581748	-0.501853	-0.873521	-1.27279	-1.54429	-1.65009	-0.624005	-1.56485	-1.75571	-3.05595	0.117098	FALSE	no hit
CYTH2	9266	-1.55217	0.550635	-1.74476	-3.46239	-1.05703	-1.30683	-0.260964	-1.6033	-2.13894	-2.71162	-2.70612	-0.999089	-2.76622	-2.89973	-5.59164	0.192701	FALSE	no hit
DAPK3	1613	-2.47945	-0.13256	-3.77993	-3.52585	1.16931	3.14481	0.517913	-0.154801	-1.43709	-1.53	-2.34991	-0.431368	-1.1007	-1.51649	-3.17134	1.38574	FALSE	no hit
DCLK1	9201	-2.04906	-0.378482	-2.17663	-3.59208	0.510201	1.05389	0.509883	-0.0331717	-1.63091	-1.7551	-2.58303	-0.554594	-1.74948	-1.4886	-4.92122	1.16138	FALSE	no hit
DDC	1644	-3.17525	-0.796936	-5.66417	-3.06464	-0.691048	-1.15507	0.220815	-1.13889	-2.20039	-3.27035	-2.92359	-0.40723	-1.56394	-2.55088	-3.23988	1.09894	FALSE	no hit
DDX58	23586	-3.89051	-0.677378	-6.56421	-4.42996	-0.284094	0.311952	0.140519	-1.30475	-2.15345	-2.33816	-3.33592	-0.786271	-1.42434	-1.87975	-3.72733	1.33407	FALSE	no hit
DEFB116	245930	-3.70686	-0.475818	-5.82534	-4.81942	0.657942	0.902131	0.57412	0.497575	-2.4257	-2.87007	-3.86577	-0.541257	-1.88363	-2.38202	-5.29537	2.02649	FALSE	no hit
DEFB135	613209	-3.82015	-1.20122	-5.82053	-4.43869	0.395035	0.935856	0.702595	-0.453346	-2.06848	-2.15379	-3.58793	-0.46373	-1.4496	-1.42302	-4.91964	1.99387	FALSE	no hit
DHFR2	200895	-4.6155	-0.987319	-6.35513	-6.50407	-4.35891	-5.94395	-2.12384	-5.00892	-2.76348	-3.38715	-3.63659	-1.26672	-1.73339	-2.49419	-4.60125	1.89526	FALSE	toxic
DHRS7C	201140	-3.33881	0.160106	-4.43365	-5.74289	0.111812	1.30683	-0.429586	-0.541804	-1.94451	-1.71248	-3.42077	-0.700265	-1.61027	-1.90298	-5.47652	2.54869	FALSE	no hit
DKK3	27122	-2.85132	0.807197	-4.72319	-4.63798	-0.374342	0.00843113	-0.268993	-0.862464	-2.43801	-2.25018	-4.03053	-1.03333	-2.81659	-2.72936	-6.66966	0.949254	FALSE	no hit
DMD	1756	-3.13039	0.109794	-3.79976	-5.7012	-0.679451	-2.11621	0.365349	-0.287488	-2.1453	-3.49879	-2.86723	-0.0698818	-1.35754	-3.25311	-4.59741	3.77789	FALSE	no hit
CTBP2	1488	-1.42432	-1.59946	-1.30299	-1.3705	-0.414126	-0.44685	-0.397468	-0.39806	0.157448	1.0858	-0.308927	-0.304527	0.5974	1.74393	-0.141599	0.189872	FALSE	no hit
CTRC	11330	-1.67975	-1.92681	-2.0169	-1.09554	-0.484019	0.413126	-0.991662	-0.873521	-0.0742763	0.88581	-0.943894	-0.164745	0.309491	1.68674	-1.06221	0.303938	TRUE	no hit
CTSV	1515	-0.949948	-0.698406	-1.32896	-0.822477	0.193934	0.733509	-0.726683	0.574976	-0.168776	0.935253	-1.12855	-0.31303	-0.452438	0.891884	-2.00574	-0.243459	FALSE	no hit
CXCL1	2919	-1.82021	-0.568678	-2.852	-2.03996	-2.7727	-3.3303	-2.03552	-2.95228	-0.872248	-0.300819	-1.45068	-0.865243	-0.641886	-0.072026	-1.36865	-0.484985	FALSE	no hit
CXCR1	3577	-2.52214	-0.643864	-3.81122	-3.11134	-0.472865	-0.0590179	0.365349	-1.72493	-1.94798	-2.005	-2.33849	-1.50046	-1.97197	-1.60555	-3.23025	-1.0801	FALSE	no hit
CYBA	1535	-2.8332	-0.177173	-5.07606	-3.24638	-1.65602	-2.21739	-1.04787	-1.70281	-1.1069	-0.24817	-2.20372	-0.868798	-0.653572	-0.485431	-1.80086	0.325579	FALSE	no hit
CYP1A2	1544	-5.3549	-2.34935	-8.74916	-4.9662	-0.0567056	-0.143329	-0.236875	0.210087	-2.55203	-2.06136	-4.06583	-1.52891	-1.48188	-0.567454	-4.03569	0.15749	FALSE	<-3 in 2 replicates | <-2 in all replicates
CYP2B6	1555	-2.05963	0.468687	-4.59369	-2.05389	-0.665235	-0.935856	-0.429586	-0.630262	-1.44456	-0.850082	-2.88577	-0.597828	-1.42635	-1.37319	-3.02235	0.116472	FALSE	no hit
CYP3A4	1576	-5.35531	-1.50717	-9.59618	-4.96259	0.105577	0.615473	0.132489	-0.431232	-2.51506	-1.69035	-4.16237	-1.69245	-1.50685	-0.738756	-3.59634	-0.185458	FALSE	no hit
CYP4V2	285440	-3.18509	-0.239997	-5.46955	-3.84572	0.435367	0.632335	0.485794	0.187973	-1.83413	-0.865898	-3.28988	-1.3466	-1.82265	-0.913086	-4.38485	-0.170024	FALSE	no hit
CYTH3	9265	-3.51483	-0.427472	-5.26373	-4.85329	-0.535861	-1.69466	-0.421557	0.508632	-2.94177	-3.45541	-3.8346	-1.5353	-2.88857	-2.97446	-5.75154	0.0602969	FALSE	no hit
DAPP1	27071	-2.1979	-0.55775	-2.23956	-3.79639	-1.32285	-2.68953	-0.405497	-0.873521	-2.1918	-2.71414	-2.6137	-1.24757	-2.47299	-2.19498	-5.13228	-0.0917187	FALSE	no hit
DCLK2	166614	-2.9693	-0.345309	-4.94787	-3.61472	-0.304984	-0.379401	-0.148549	-0.387003	-2.13237	-2.26402	-3.25758	-0.875506	-2.01526	-1.98023	-4.66068	0.595119	FALSE	no hit
DDI1	414301	-2.97623	0.019139	-4.81675	-4.13109	-0.233665	-0.649197	0.35732	-0.409117	-1.68736	-1.2951	-2.9978	-0.76918	-1.39481	-1.46226	-3.93213	1.20997	FALSE	no hit
DDX6	1656	-1.20153	1.83482	-3.20919	-2.23022	-0.290777	-0.750371	0.895306	-1.01726	0.728709	1.82272	-0.236047	0.599457	2.16394	-0.158676	4.07408	2.57642	FALSE	no hit
DEFB118	117285	-2.54296	1.19132	-3.83866	-4.98154	-0.876064	-0.918994	0.236875	-1.94607	-2.05237	-2.08526	-2.65264	-1.41921	-2.16842	-2.83161	-4.06802	0.394371	FALSE	no hit
DERA	51071	-5.12328	-1.35429	-6.40037	-7.61519	-0.730626	-0.649197	-0.204756	-1.33792	-2.73147	-3.04014	-3.29516	-1.85911	-1.46401	-2.06104	-3.81636	1.48538	FALSE	no hit
DHH	50846	-4.40799	-0.418742	-7.69192	-5.11332	-0.309683	0.952718	0.694565	-2.57633	-2.45695	-2.06486	-4.02855	-1.27744	-1.89966	-1.83216	-4.62093	0.754093	FALSE	no hit
DHRS9	10170	-4.02746	-0.659291	-5.30304	-6.12004	-0.209462	0.126467	-0.0361334	-0.71872	-2.50148	-2.55342	-3.96659	-0.984443	-2.17761	-2.10596	-6.50028	2.07341	FALSE	no hit
DKK4	27121	-3.44261	-0.906888	-3.65287	-5.76806	0.255639	0.615473	0.228845	-0.0774006	-2.15621	-3.14228	-2.82562	-0.500738	-1.36407	-2.34026	-4.66679	2.91485	FALSE	no hit
DMKN	93099	-1.16353	2.05669	-1.22405	-4.32323	-1.01218	-1.2731	0.204756	-1.96819	-1.35615	-1.8121	-1.6357	-0.620639	-1.59425	-3.02331	-3.38238	1.62295	FALSE	no hit
CTBS	1486	-1.01384	-0.765006	-1.22653	-1.04997	-1.49179	-1.5429	-1.82675	-1.10572	0.170226	1.22436	-0.423493	-0.290188	0.240058	1.1423	-0.492674	0.0705442	FALSE	no hit
CTRL	1506	-1.00026	-1.78799	-0.111661	-1.10114	-0.655713	-0.429988	-1.21649	-0.32066	0.116973	0.896545	-0.172273	-0.373354	0.429496	1.62176	-0.194849	-0.138426	FALSE	no hit
CTSW	1521	-1.15049	-0.579568	-1.65089	-1.22101	1.10366	2.62208	-0.228845	0.91775	0.466496	2.2465	-1.04768	0.200674	0.474498	1.87134	-1.51525	1.0674	FALSE	no hit
CXCL10	3627	0.200087	0.605958	0.846019	-0.851716	1.48144	1.91387	1.10408	1.42638	-0.45277	-0.80378	-0.423454	-0.131075	-1.02697	-1.38261	-1.90069	0.202396	FALSE	no hit
CXCR2	3579	-1.36537	-0.849347	-2.56721	-0.679557	1.0216	1.07075	0.855158	1.13889	-1.0888	-2.15365	-1.29041	0.177672	-0.903538	-1.60822	-1.75953	0.657141	FALSE	no hit
CYBB	1536	-0.83268	-0.0909889	-2.04469	-0.362366	0.221467	0.480575	0.0843113	0.099515	-0.79799	-1.29834	-1.50558	0.409947	-1.02266	-1.35636	-2.58764	0.876009	FALSE	no hit
CYP1B1	1545	-3.2045	-1.11643	-5.48459	-3.01248	-0.642006	-0.531161	-0.919395	-0.475461	-2.1422	-2.52809	-2.80478	-1.09373	-1.78667	-1.72194	-3.32346	-0.3146	FALSE	no hit
CYP2C18	1562	-1.86014	-0.250806	-2.45927	-2.87034	-0.610019	-1.03703	-0.0521927	-0.740834	-1.85834	-2.25963	-2.10478	-1.21062	-2.1184	-2.0273	-3.75919	-0.568712	FALSE	no hit
CYP3A43	64816	-1.87751	-0.390419	-2.88851	-2.3536	-0.457306	-0.463712	-0.333231	-0.574976	-1.41235	-2.22955	-1.64392	-0.363593	-1.20125	-1.92992	-2.32187	0.64803	FALSE	no hit
CYP4X1	260293	-1.2528	-0.268115	-2.18379	-1.30649	0.60675	1.45859	0.140519	0.221145	-1.17196	-2.10083	-1.3966	-0.0184391	-1.09188	-1.92675	-2.14165	0.792778	FALSE	no hit
CYTL1	54360	-0.247001	1.8605	-1.20675	-1.39476	-0.245411	-0.767233	0.1084	-0.0774006	-1.11271	-0.85868	-2.16118	-0.318256	-2.22497	-2.20053	-4.55454	0.0801431	FALSE	no hit
DARS	1615	-3.47663	-0.410819	-5.68986	-4.32921	-0.0179439	-0.581748	0.550031	-0.0221145	-2.11904	-2.16066	-3.54591	-0.650539	-1.71941	-1.9048	-4.80573	1.5523	FALSE	no hit
DCLK3	85443	-1.87527	-0.0843478	-2.56282	-2.97866	0.278425	1.34055	0.445646	-0.950921	-1.68811	-1.77721	-2.63324	-0.653875	-2.02798	-1.77253	-4.79046	0.479068	FALSE	no hit
DDIAS	220042	-2.77568	-1.42001	-4.46933	-2.43769	-0.206408	-1.12134	0.325201	0.176916	-2.63994	-4.46923	-2.59304	-0.857536	-2.30438	-3.11317	-3.51386	-0.286101	FALSE	no hit
DEAF1	10522	-3.03488	-0.359813	-3.88325	-4.86158	-1.55804	-2.52091	-0.638357	-1.51484	-1.96676	-2.41017	-2.21621	-1.27388	-1.44138	-2.14747	-2.85968	0.682998	FALSE	no hit
DEFB119	245932	-1.88704	0.717188	-2.24671	-4.13161	-0.0334635	0.81782	0.983632	-1.90184	-1.6112	-0.972652	-2.72869	-1.13227	-2.1874	-1.64536	-5.23191	0.31508	FALSE	no hit
DERL1	79139	-2.75443	-0.820445	-3.84878	-3.59406	-0.317288	-0.109605	-0.068252	-0.774006	-1.93488	-2.40823	-3.09271	-0.303687	-1.7264	-1.93535	-4.96765	1.7238	FALSE	no hit
DHODH	1723	-2.81254	0.822161	-5.21214	-4.04763	0.370077	-0.548024	0.220815	1.43744	-1.60043	-1.65291	-3.1176	-0.0307635	-1.24851	-2.23186	-4.0343	2.52063	FALSE	no hit
DHX36	170506	-3.99502	0.586893	-6.55169	-6.02028	-7.27953	-10.2438	-4.21958	-7.37517	-3.09692	-3.29535	-3.8869	-2.10852	-2.76412	-3.25671	-4.89253	-0.143114	FALSE	toxic
DKKL1	27120	-3.08503	0.544232	-5.75923	-4.0401	0.634187	0.834682	1.11211	-0.0442289	-1.54372	-2.34931	-2.16918	-0.112677	-0.499183	-2.60292	-1.33419	2.43957	FALSE	no hit
DMP1	1758	-1.85934	0.850101	-1.73593	-4.69218	-0.982226	-1.34055	-0.12446	-1.48167	-1.72314	-1.57537	-2.26878	-1.32528	-2.01665	-2.08139	-4.40129	0.432734	FALSE	no hit
CTDSP1	58190	-0.650194	-0.406754	-1.58727	0.0434463	-0.823445	-0.548024	-1.10408	-0.818235	-0.122772	0.570951	-1.39897	0.459701	-0.463873	0.286165	-2.33654	0.65876	FALSE	no hit
CTSA	5476	-1.3758	0.231129	-3.00681	-1.35171	-2.08361	-2.55463	-1.29679	-2.39942	0.0603382	1.25909	-1.07477	-0.00330856	0.282367	0.550041	-0.440349	0.737408	FALSE	no hit
CTSZ	1522	-0.729505	-0.0378275	-1.32212	-0.828563	0.818869	1.34055	-0.188697	1.30475	-0.272863	0.385519	-1.17098	-0.0331249	-0.640434	-0.0674289	-2.17466	0.320789	FALSE	no hit
CXCL11	6373	0.369895	1.08866	0.158911	-0.137883	-0.938023	-1.2731	-0.678506	-0.862464	0.10309	0.52854	-0.51158	0.292311	-0.635113	-0.759248	-1.63707	0.490982	FALSE	no hit
CXCR3	2833	-1.32183	-0.163634	-2.16202	-1.63985	-5.19409	-7.32666	-3.45677	-4.79884	-1.48263	-1.77396	-2.19275	-0.48117	-1.84614	-1.6878	-3.88545	0.0348444	FALSE	toxic
CYBRD1	79901	-2.8772	-0.162415	-4.80575	-3.66342	-0.100053	0.210778	-0.477764	-0.0331717	-1.85281	-1.5597	-2.7746	-1.22412	-1.73229	-1.56756	-3.5812	-0.0481077	FALSE	no hit
CYP20A1	57404	-4.22244	-1.20701	-8.95843	-2.50186	0.264358	0.0590179	0.501853	0.232202	-2.06073	-1.70577	-3.94365	-0.532757	-1.35978	-1.02486	-3.59775	0.543287	FALSE	no hit
CYP2C19	1557	-0.416936	1.04895	-0.184687	-2.11507	1.27402	1.5429	1.09605	1.18312	-0.755701	-0.142809	-1.45743	-0.666863	-1.64633	-1.17554	-3.74042	-0.023034	FALSE	no hit
CYP3A5	1577	-2.52037	-0.161391	-3.74264	-3.65707	-0.396522	-1.08762	-0.389438	0.287488	-1.67917	-0.917545	-3.08924	-1.03071	-1.90712	-1.0819	-4.99769	0.358228	FALSE	no hit
CYP4Z1	199974	-0.717156	1.37001	-2.2786	-1.24288	0.602577	0.598611	0.766832	0.442289	-0.531753	0.532816	-1.85519	-0.272889	-1.24557	-0.895027	-3.13923	0.297544	FALSE	no hit
DAAM2	23500	-1.54397	1.1188	-3.44383	-2.30689	0.69673	0.396263	1.24058	0.453346	-1.32558	-1.1093	-2.31156	-0.555871	-1.66949	-1.98703	-3.37951	0.358074	FALSE	no hit
DARS2	55157	-1.71375	0.288784	-1.31204	-4.11798	-1.1138	-2.3017	0.220815	-1.26052	-1.33076	-1.06486	-1.71333	-1.21409	-1.63177	-1.48805	-3.59634	0.189085	FALSE	no hit
DCN	1634	-2.1025	0.450855	-2.89546	-3.86291	0.178067	0.29509	0.0843113	0.154801	-1.64956	-1.13603	-2.8432	-0.969455	-2.0506	-1.51754	-5.1103	0.476035	FALSE	no hit
DDO	8528	-2.61338	0.654703	-4.67299	-3.82185	-0.523628	-1.05389	0.212786	-0.729777	-2.17079	-1.82221	-3.53266	-1.15752	-2.64783	-2.34495	-5.77691	0.178363	FALSE	no hit
DECR1	1666	-1.20407	0.979912	-2.15112	-2.44101	-2.26912	-3.88675	-0.333231	-2.58739	-1.32523	-1.20824	-2.58659	-0.180872	-1.9399	-2.0178	-4.93491	1.13302	FALSE	no hit
DEFB121	245934	-0.700788	1.6918	-0.272771	-3.52139	-0.0444768	0.143329	0.895306	-1.17207	-1.35333	-0.96462	-1.70419	-1.39118	-2.36696	-2.23277	-4.21536	-0.652741	FALSE	no hit
DES	1674	-3.45493	0.373634	-5.83085	-4.90757	0.191661	0.261365	0.678506	-0.364888	-2.082	-1.82384	-3.23826	-1.1839	-1.78105	-2.04361	-4.06755	0.768016	FALSE	no hit
DHPS	1725	-2.54404	0.36495	-3.70541	-4.29165	0.303734	1.81269	0.558061	-1.45955	-1.65932	-1.37745	-2.73481	-0.865697	-1.60785	-1.80956	-4.19128	1.17729	FALSE	no hit
DHX58	79132	-3.46759	0.530856	-5.42473	-5.5089	-4.01595	-7.10745	-1.45738	-3.48303	-2.13347	-2.27268	-3.85243	-0.275289	-1.67418	-2.45093	-5.80557	3.23397	FALSE	toxic
DLAT	1737	-1.67044	1.43367	-2.28729	-4.15769	-0.427061	-0.581748	0.550031	-1.24947	-1.20687	-1.39465	-2.44079	0.214839	-1.25364	-2.39965	-4.54529	3.18403	FALSE	no hit
DMPK	1760	-2.016	0.841299	-2.73618	-4.15311	-0.0157631	0.210778	0.493824	-0.751891	-0.940305	-1.02032	-2.57104	0.770444	-0.674416	-1.7752	-4.50557	4.25752	FALSE	no hit
CTDSPL	10217	0.730325	-0.138349	1.55301	0.776313	-0.566062	-1.408	-0.887277	0.59709	0.273553	-0.26514	0.45777	0.628029	-0.0193774	-0.476349	-0.199573	0.617789	FALSE	no hit
CTSB	1508	-0.0343692	0.0172868	0.7201	-0.840494	-0.0566705	0.160192	-0.34126	0.0110572	-0.0215842	0.185955	0.112308	-0.363015	-0.391672	-0.22435	-0.731873	-0.218793	FALSE	no hit
CTTN	2017	-1.19477	-0.759418	-2.03286	-0.79202	-0.159577	0.44685	-0.140519	-0.785063	-0.773671	-1.06367	-1.45059	0.193247	-0.771813	-0.750859	-2.35516	0.790585	FALSE	no hit
CXCL12	6387	-1.99292	-0.711961	-3.27019	-1.99662	0.272436	0.581748	0.445646	-0.210087	-1.73257	-2.50949	-1.52116	-1.16706	-1.58815	-2.02302	-1.60578	-1.13566	FALSE	no hit
CXCR4	7852	-1.55624	-0.361451	-1.8219	-2.48538	0.305454	-0.345677	1.00772	0.254316	-1.21133	-2.2543	-0.857993	-0.521702	-0.869025	-1.9435	-1.15861	0.495038	FALSE	no hit
CYC1	1537	-2.15721	-0.916089	-2.54385	-3.01168	-1.87303	-2.50405	-1.40117	-1.71387	-1.46423	-2.62039	-1.27332	-0.498997	-0.851947	-1.87289	-1.52691	0.843956	FALSE	no hit
CYP21A2	1589	-3.66763	-1.43355	-5.50651	-4.06282	-2.57621	-3.83617	-1.80266	-2.08982	-2.60067	-3.26873	-3.26046	-1.27284	-1.95282	-2.05627	-4.04278	0.240603	FALSE	no hit
CYP2C8	1558	-1.60535	-0.026533	-3.1279	-1.66161	-2.94712	-4.52752	-1.68221	-2.63162	-2.106	-2.99341	-2.92418	-0.400397	-2.60796	-2.69331	-5.27917	0.148611	FALSE	no hit
CYP3A7	1551	-3.96702	-2.03001	-5.79894	-4.0721	-0.594591	-0.598611	0.0200741	-1.20524	-2.48638	-3.24532	-2.69455	-1.51925	-1.6563	-1.79076	-2.71338	-0.464777	FALSE	<-3 in 2 replicates | <-2 in all replicates
CYP51A1	1595	-3.32233	-1.91751	-5.24886	-2.80064	-3.06165	-4.40948	-1.51359	-3.26188	-2.22134	-3.52468	-2.82798	-0.311373	-1.46631	-2.02679	-3.37662	1.00449	FALSE	toxic
DAB2	1601	-2.35097	-0.476549	-3.49437	-3.082	-1.62395	-2.06563	-0.871217	-1.93501	-2.30729	-2.71322	-3.27947	-0.929178	-2.63827	-2.38769	-5.62005	0.0929335	FALSE	no hit
DBF4	10926	-2.42836	-0.280295	-3.60785	-3.39694	-1.34616	-1.89701	-0.405497	-1.73598	-2.04154	-1.9161	-3.30292	-0.905593	-2.35921	-1.79649	-5.6549	0.37376	FALSE	no hit
DCPS	28960	-4.31831	-0.847787	-6.59608	-5.51106	-1.35482	-1.59348	-0.558061	-1.9129	-2.23891	-1.65811	-3.87832	-1.18029	-1.55632	-1.21862	-4.74851	1.29816	FALSE	no hit
DDOST	1650	-1.92699	-0.03828	-2.77393	-2.96875	-0.11992	0.750371	0.260964	-1.3711	-1.10892	-0.171554	-2.39441	-0.760808	-1.41533	-0.417729	-4.1423	0.31405	FALSE	no hit
DECR2	26063	-3.4577	-0.801067	-4.45693	-5.1151	-1.89743	-3.02678	-0.188697	-2.47682	-2.59895	-3.01511	-3.19831	-1.58345	-2.35035	-2.32495	-4.82859	0.102502	FALSE	no hit
DEFB123	245936	-2.54259	0.185094	-4.64632	-3.16656	-0.394184	-0.193916	0.34929	-1.33792	-2.45839	-2.54445	-3.69596	-1.13476	-2.93648	-2.54471	-5.91499	-0.349734	FALSE	no hit
DESI1	27351	-4.56533	-0.858224	-7.1917	-5.64608	0.403837	1.37427	0.622298	-0.785063	-2.5103	-2.46297	-3.65126	-1.41667	-1.6371	-1.82608	-4.06287	0.977647	FALSE	no hit
DHRS1	115817	-3.41865	0.20343	-4.78849	-5.67089	-2.0027	-2.55463	-0.943484	-2.50999	-2.45022	-2.50256	-3.45131	-1.39678	-2.22424	-2.54265	-5.10409	0.97401	FALSE	no hit
DHX9	1660	-3.33968	0.0599966	-4.63748	-5.44156	-1.77967	-1.71152	-0.188697	-3.4388	-2.07957	-1.63788	-3.18829	-1.41254	-1.90894	-1.78052	-4.69435	0.748056	FALSE	no hit
DLD	1738	-4.0245	0.265186	-5.06528	-7.27341	-1.81072	-4.00479	-0.0120445	-1.41532	-2.08594	-2.51147	-3.36888	-0.377468	-1.0442	-2.5315	-4.96321	4.3621	FALSE	no hit
DMXL2	23312	-3.97988	0.443978	-5.38779	-6.99583	-0.632107	-1.2731	-0.00401483	-0.619205	-1.93452	-2.32089	-2.95035	-0.532309	-0.766597	-2.51813	-3.60022	3.81856	FALSE	no hit
CTF1	1489	-0.250533	-0.265395	-0.582009	0.0958047	0.0984466	0.531161	-0.268993	0.0331717	0.483881	1.01479	0.0682828	0.368576	0.631853	0.609191	0.717107	0.569262	FALSE	no hit
CTSC	1075	-1.01121	-0.387095	-2.73446	0.0879168	0.327322	0.0590179	0.558061	0.364888	-0.725033	-0.73428	-1.57413	0.133311	-0.992522	-0.679774	-2.26995	-0.0278431	FALSE	no hit
CTXN1	404217	-1.26181	-0.803674	-1.72277	-1.25897	-0.00474978	1.89701	-0.429586	-1.48167	-0.725148	-0.360746	-0.821674	-0.993024	-0.809471	-0.205421	-1.00491	-1.21808	FALSE	no hit
CXCL13	10563	0.219551	0.668583	0.210935	-0.220865	-0.27144	-0.463712	-0.140519	-0.210087	-0.549869	-0.775211	-1.10966	0.23526	-1.40697	-1.42805	-3.1983	0.405426	FALSE	no hit
CXCR5	643	-0.391421	0.979515	-0.0546624	-2.09912	-0.834086	-0.632335	-0.509883	-1.36004	-1.0377	-0.833679	-1.18207	-1.09736	-1.95498	-1.74083	-3.17913	-0.94498	FALSE	no hit
CYCS	54205	-2.15695	-0.0787763	-2.74198	-3.6501	-6.18368	-8.72622	-4.07505	-5.74976	-1.93363	-1.71222	-2.72461	-1.36405	-2.26444	-1.67335	-4.81452	-0.305465	FALSE	toxic
CYP24A1	1591	-3.83803	-2.07133	-6.32027	-3.12249	0.10867	-0.143329	0.734713	-0.265373	-2.46239	-2.82321	-3.08832	-1.47565	-1.83198	-1.31981	-3.19781	-0.97832	FALSE	<-3 in 2 replicates | <-2 in all replicates
CYP2C9	1559	-1.55012	-1.21883	-0.820223	-2.6113	-0.88476	-1.28996	-0.501853	-0.862464	-2.18533	-2.87049	-1.93119	-1.7543	-2.65477	-1.81025	-4.32909	-1.82496	FALSE	no hit
CYP46A1	10858	-3.3802	-0.672766	-7.7357	-1.73214	-2.27122	-2.33542	-1.30482	-3.17342	-2.21117	-1.83233	-3.91697	-0.884204	-2.14788	-1.50562	-4.13752	-0.800499	FALSE	no hit
CYP7A1	1581	-2.44796	-0.690297	-3.62005	-3.03353	-1.20693	-1.69466	0.1084	-2.03453	-1.93192	-1.8101	-2.45461	-1.53105	-2.05506	-1.37295	-3.67332	-1.11892	FALSE	no hit
DAB2IP	153090	0.816137	2.60743	0.927064	-1.08608	0.360354	1.03703	0.132489	-0.0884578	-0.417212	0.918631	-1.70495	-0.465315	-2.25699	-1.3653	-5.0116	-0.394067	FALSE	no hit
DBH	1621	-2.91367	-1.45633	-2.76462	-4.52006	-2.88521	-4.20714	-1.7063	-2.74219	-2.38006	-2.2835	-3.40801	-1.44868	-2.61134	-1.21494	-6.61053	-0.00855111	FALSE	no hit
DCSTAMP	81501	-3.32534	-1.09644	-4.4896	-4.38999	-1.09135	-2.36915	-0.517913	-0.387003	-2.18129	-1.77592	-3.28996	-1.47798	-2.10125	-1.09388	-5.15667	-0.0531929	FALSE	no hit
DDR1	780	-3.29678	-1.32506	-4.09295	-4.47234	-2.15267	-2.0319	-1.20846	-3.21765	-2.17532	-1.92448	-3.07778	-1.5237	-2.05954	-1.08359	-4.95258	-0.14245	FALSE	no hit
DEFA4	1669	-2.44285	0.187401	-4.25884	-3.2571	-0.575825	-1.15507	0.301112	-0.873521	-1.91988	-1.78544	-3.14558	-0.828605	-2.21166	-1.99354	-5.05549	0.414042	FALSE	no hit
DEFB124	245937	-3.28373	-0.889308	-3.53211	-5.42976	-2.46862	-3.49892	-0.855158	-3.05179	-2.06227	-2.3791	-3.24812	-0.55961	-1.67775	-1.75719	-5.71475	2.43869	FALSE	toxic
DESI2	51029	-4.79723	-0.935283	-8.18945	-5.26695	-1.55013	-1.64407	-0.164608	-2.84171	-2.57879	-2.83355	-4.01318	-0.889636	-1.51364	-2.15397	-4.18839	1.80144	FALSE	no hit
DHRS11	79154	-4.04817	-1.55304	-4.8985	-5.69296	-0.81592	-1.30683	0.694565	-1.8355	-2.87382	-3.52981	-2.81747	-2.27418	-2.25038	-2.30989	-3.6174	-0.823844	FALSE	no hit
DICER1	23405	-4.04985	0.701556	-5.72846	-7.12265	-0.133286	0.81782	0.252934	-1.47061	-1.14129	-0.844239	-2.72394	0.144295	0.285313	-1.57856	-3.00165	5.43615	TRUE	no hit
DLG1	1739	-3.81909	-0.373477	-6.57072	-4.51306	0.116652	-0.328814	1.17634	-0.497575	-2.217	-2.51097	-3.1152	-1.02484	-1.5155	-2.2832	-3.19984	0.936537	FALSE	no hit
DNAI2	64446	-2.67546	1.31851	-4.90074	-4.44414	-2.04709	-2.31856	-0.726683	-3.09602	-1.9699	-2.00621	-3.32881	-0.574668	-1.90189	-2.79968	-4.79371	1.88771	FALSE	no hit
CTGF	1490	0.27313	-0.677764	2.07954	-0.582385	0.48215	2.18366	-0.405497	-0.331717	0.207152	0.120821	0.470516	0.0301179	0.0121625	0.205468	-0.575635	0.406655	FALSE	no hit
CTSD	1509	-0.699389	-0.435094	-1.44207	-0.221006	-0.987575	-0.649197	-0.975603	-1.33792	-0.444506	0.0813078	-0.909163	-0.505661	-0.789239	-0.0100463	-1.47895	-0.878723	FALSE	no hit
CUBN	8029	-0.52961	0.336463	-1.60007	-0.325221	0.203556	1.12134	0.0200741	-0.530747	-0.395627	0.365739	-1.50707	-0.0455543	-1.00193	-0.285074	-2.70337	-0.0173437	FALSE	no hit
CXCL14	9547	-1.38053	0.13048	-2.52648	-1.74559	-2.8754	-3.76872	-1.79463	-3.06285	-1.26331	-1.26869	-1.61042	-0.910805	-1.48387	-1.47678	-2.16115	-0.813688	FALSE	toxic
CXCR6	10663	0.369655	0.381483	1.55952	-0.832038	0.682509	0.548024	0.847128	0.652376	-0.430854	-1.06558	-0.0610299	-0.165951	-0.966557	-1.52075	-1.40931	0.0303913	FALSE	no hit
CYFIP1	23191	-2.47931	0.0768982	-5.012	-2.50284	-3.47953	-4.69614	-2.20414	-3.53831	-1.67171	-1.83053	-2.41824	-0.766348	-1.38227	-1.93744	-2.2826	0.0732375	FALSE	toxic
CYP26A1	1592	-2.69704	-1.23237	-3.92136	-2.9374	-1.89377	-2.4366	-1.4092	-1.8355	-2.6282	-3.74623	-3.23206	-0.906303	-2.6552	-2.64749	-5.35883	0.0407142	FALSE	no hit
CYP2D6	1565	-0.762826	0.834649	-1.95107	-1.17206	-1.68459	-2.5715	-1.0559	-1.42638	-1.82169	-2.23959	-2.82691	-0.398578	-2.81095	-2.67752	-5.62955	-0.12577	FALSE	no hit
CYP4A11	1579	-3.10071	-1.3844	-4.37785	-3.53987	-0.78055	-1.79583	-0.00401483	-0.541804	-2.25364	-3.10614	-2.42838	-1.22638	-1.67795	-1.91624	-2.94847	-0.169141	FALSE	no hit
CYP7B1	9420	-1.34669	-0.387964	-1.89397	-1.75813	0.515686	0.548024	0.766832	0.232202	-1.37586	-1.65125	-2.1349	-0.341422	-1.66219	-1.42184	-3.90783	0.343113	FALSE	no hit
DAD1	1603	-0.883779	2.07743	-2.62559	-2.10317	-1.91715	-3.61696	-0.365349	-1.76916	-1.3251	-0.524443	-2.87244	-0.578426	-2.44581	-2.11247	-5.30868	0.0837138	FALSE	no hit
DBI	1622	-2.98546	-0.493011	-5.03897	-3.42439	-2.56165	-3.36402	-1.63403	-2.68691	-2.16057	-1.4975	-3.71615	-1.26805	-2.45442	-1.36012	-5.59032	-0.412811	FALSE	no hit
DCT	1638	-2.92418	-0.408639	-4.94706	-3.41686	-1.89555	-3.04364	0.220815	-2.86382	-2.08115	-1.64263	-3.12684	-1.47399	-2.14019	-1.47178	-4.23897	-0.709819	FALSE	no hit
DDR2	4921	-2.4959	-0.637877	-3.39331	-3.4565	-2.13924	-2.67267	-0.903336	-2.84171	-2.09695	-2.08092	-2.76528	-1.44466	-2.33347	-1.65677	-4.62421	-0.719424	FALSE	no hit
DEFA5	1670	-2.81452	-0.364042	-4.69944	-3.38007	0.0758188	0.918994	0.646387	-1.33792	-1.98695	-1.67198	-3.31617	-0.9727	-2.19042	-1.55647	-5.16366	0.148885	FALSE	no hit
DEFB125	245938	-2.2894	-0.0239496	-3.3142	-3.53006	-0.462343	-0.429988	0.734713	-1.69176	-1.62185	-1.4005	-2.4259	-1.03916	-1.76068	-1.54874	-3.89709	0.163793	FALSE	no hit
DGAT1	8694	-2.74626	-0.336275	-3.001	-4.90151	-1.88454	-2.36915	-0.365349	-2.91911	-1.66114	-1.30244	-2.34351	-1.33747	-1.47819	-1.24391	-3.70926	0.518589	FALSE	no hit
DHRS12	79758	-3.14081	-0.379702	-5.435	-3.60772	-1.12738	-2.70639	0.164608	-0.840349	-2.0814	-2.72914	-3.06766	-0.44741	-1.61547	-2.42965	-3.79093	1.37417	FALSE	no hit
DIO1	1733	-2.07332	-0.27088	-3.04433	-2.90476	-2.06487	-2.35229	-0.381408	-3.46091	-2.15638	-1.99468	-3.39288	-1.0816	-2.84814	-1.74792	-6.41218	-0.384325	FALSE	no hit
DLG3	1741	-2.31552	0.700483	-3.90206	-3.745	0.303374	0.935856	0.405497	-0.431232	-1.77044	-2.00862	-2.75779	-0.544916	-1.78527	-2.51337	-4.04926	1.20682	FALSE	no hit
DNAJA1	3301	-1.81926	0.786303	-2.66213	-3.58195	-3.48302	-5.77533	-0.991662	-3.68206	-2.18866	-2.76016	-2.77704	-1.02877	-2.6544	-3.07275	-5.0935	0.203037	FALSE	toxic
CTH	1491	-0.751982	-0.298524	-1.66678	-0.290645	-2.2252	-2.87502	-1.40117	-2.39942	0.455123	2.02817	-0.650383	-0.0124146	0.284198	1.47395	-0.701878	0.0805256	FALSE	no hit
CTSE	1510	-1.03019	0.0404455	-1.75067	-1.38035	-1.60831	-2.65581	-1.41723	-0.751891	-0.0994406	0.275494	-0.43959	-0.134226	0.084291	-0.234599	-0.0246671	0.512139	TRUE	no hit
CUL3	8452	-1.85988	-0.177349	-3.33102	-2.07127	-0.4542	-0.834682	-0.550031	0.0221145	-0.856686	-0.442408	-1.87599	-0.251654	-0.677481	-0.456466	-2.36613	0.790147	FALSE	no hit
CXCL16	58191	-0.762282	0.598086	-1.71517	-1.16976	-0.467209	-0.750371	-0.0762817	-0.574976	-0.540687	-0.48514	-1.04331	-0.0936137	-0.702887	-1.09178	-1.46182	0.444933	FALSE	no hit
CXorf36	79742	-0.593122	-0.0568191	-1.13279	-0.58976	0.429119	1.07075	0.34929	-0.132687	-0.529854	-0.712235	-0.972985	0.0956578	-0.736995	-0.952955	-1.6719	0.413867	FALSE	no hit
CYFIP2	26999	-1.70016	1.20625	-4.27972	-2.02702	-0.0578991	0.66606	-0.397468	-0.442289	-1.09556	-0.123281	-2.63262	-0.530792	-1.61016	-1.3128	-3.6223	0.104623	FALSE	no hit
CYP26B1	56603	-1.85457	-1.59102	-1.15228	-2.82042	-1.05152	-0.379401	-0.80698	-1.96819	-1.73671	-2.84798	-1.43493	-0.927201	-1.5262	-1.62938	-2.94712	-0.00211728	FALSE	no hit
CYP2E1	1571	-1.03685	1.00491	-1.92706	-2.18841	-1.35668	-1.84642	-0.598209	-1.62541	-1.64771	-1.58971	-1.93561	-1.41783	-2.52505	-2.37668	-3.75622	-1.44226	FALSE	no hit
CYP4A22	284541	-2.15064	-0.267066	-3.63055	-2.55429	-1.07161	-2.04877	0.0281038	-1.19418	-1.63155	-1.91542	-2.26574	-0.713507	-1.66961	-1.7771	-3.31743	0.0857091	FALSE	no hit
CYP8B1	1582	-1.27664	0.525068	-0.544417	-3.81056	-0.1077	-0.177054	0.196726	-0.342774	-1.1747	-1.11343	-1.24463	-1.16604	-1.44838	-1.54117	-2.9846	0.18062	FALSE	no hit
DAG1	1605	-1.74176	0.0598376	-1.5159	-3.76921	-4.40596	-6.66903	-2.05961	-4.48923	-2.44708	-2.67722	-2.82701	-1.83701	-3.1715	-2.53207	-5.76834	-1.21408	FALSE	toxic
DBNL	28988	-1.88405	-0.263048	-3.02738	-2.36173	-2.94537	-4.54438	-1.00772	-3.284	-0.720078	0.656193	-2.49933	-0.317102	-1.03214	0.339263	-4.27788	0.84221	FALSE	toxic
DCTD	1635	-1.15584	1.33125	-1.74841	-3.05036	-1.8942	-2.40287	-0.847128	-2.43259	-1.18755	-0.316245	-2.51854	-0.727853	-2.08262	-1.57831	-5.14844	0.478877	FALSE	no hit
DDX1	1653	-1.71069	1.19561	-2.68908	-3.6386	-1.92286	-3.4652	-0.35732	-1.94607	-1.2311	-0.996971	-2.09941	-0.596904	-1.38147	-1.91152	-3.35854	1.12564	FALSE	no hit
DEFA6	1671	-2.28342	0.641589	-4.18218	-3.30966	-1.45946	-1.89701	-0.325201	-2.15616	-1.20903	-0.477663	-2.39464	-0.754798	-1.16056	-1.23408	-3.14245	0.894846	FALSE	no hit
DEFB126	81623	-1.52701	2.25272	-4.43472	-2.39904	-0.366891	-0.193916	0.718654	-1.62541	-0.896018	0.704871	-3.33737	-0.0555589	-1.71513	-1.34582	-5.15562	1.35605	FALSE	no hit
DGAT2	84649	-4.4886	-0.531095	-7.65422	-5.28049	-0.705221	-1.49231	0.0843113	-0.707662	-2.18092	-1.75582	-3.94834	-0.838615	-1.36713	-1.50678	-4.39083	1.79622	FALSE	no hit
DHRS13	147015	-3.85732	-0.517857	-5.52069	-5.53341	-2.23727	-3.1954	0.132489	-3.64888	-2.32069	-2.38128	-2.96448	-1.6163	-1.68754	-1.92791	-3.58549	0.45079	FALSE	toxic
DIO2	1734	-2.05366	0.376903	-3.05227	-3.48561	-1.27155	-2.1668	0.220815	-1.86867	-1.1832	-1.27474	-1.7819	-0.492964	-1.00338	-1.57639	-2.5995	1.16575	FALSE	no hit
DLG4	1742	-3.37873	0.309817	-5.23086	-5.21514	-2.3627	-3.65068	-0.252934	-3.18448	-2.30317	-2.36433	-3.00373	-1.54146	-1.93548	-2.48561	-3.73356	0.412724	FALSE	toxic
DNAJA2	10294	-1.43642	2.12904	-2.83577	-3.60252	-0.786417	-1.07075	0.558061	-1.84656	-1.32892	-0.88543	-2.20358	-0.897745	-1.83138	-2.45557	-3.60468	0.566102	FALSE	no hit
CTHRC1	115908	-0.262824	-0.759691	0.35807	-0.38685	-4.76165	-5.89336	-3.27208	-5.1195	0.407445	0.235692	0.603682	0.38296	0.885581	0.463082	1.31315	0.880511	FALSE	toxic
CTSF	8722	-0.541731	-0.692726	0.268267	-1.20073	-1.21224	-1.69466	-0.670476	-1.27158	0.40128	0.140487	0.513507	0.549846	0.918073	0.265236	0.776346	1.71264	FALSE	no hit
CUL4B	8450	-0.898444	-0.332744	-1.69339	-0.669199	0.221945	1.30683	-0.220815	-0.420175	-0.286475	-0.636749	-0.495891	0.273215	-0.0428862	-0.669571	-0.274564	0.815476	FALSE	no hit
CXCL17	284340	-2.19831	-0.595379	-3.24871	-2.75086	-2.99956	-5.38749	-2.37276	-1.23841	-1.29866	-2.11964	-1.84925	0.0729073	-0.537705	-1.70738	-2.18936	2.28362	FALSE	no hit
CYB5A	1528	-0.949991	0.940544	-2.08203	-1.70849	-0.734084	-1.45859	-0.12446	-0.619205	-1.0875	-1.23257	-1.65659	-0.373339	-1.3875	-1.89336	-2.65076	0.381607	FALSE	no hit
CYLD	1540	-1.27659	0.822671	-1.42138	-3.23106	-2.45902	-2.82443	-1.31285	-3.23977	-1.1563	-0.684979	-1.70158	-1.08233	-1.59125	-1.46423	-3.17712	-0.132403	FALSE	no hit
CYP26C1	340665	-2.7481	-1.00945	-4.45448	-2.78036	-2.78448	-5.26946	-1.33694	-1.74704	-2.55844	-4.13209	-2.74947	-0.79376	-2.15464	-3.12375	-3.47179	0.131624	FALSE	no hit
CYP2F1	1572	-1.15866	0.426066	-3.05827	-0.843785	0.171525	0.615473	0.252934	-0.353831	-1.56499	-1.66956	-2.49084	-0.534564	-2.23742	-1.95613	-4.12016	-0.635966	FALSE	no hit
CYP4B1	1580	-3.37301	-0.654533	-5.69852	-3.76598	-3.56502	-4.74673	-2.33261	-3.61571	-2.0435	-2.08505	-2.81556	-1.22988	-1.52994	-1.68022	-2.92906	0.019458	FALSE	toxic
CYR61	3491	-1.95413	0.608248	-4.17736	-2.29329	-1.13046	-2.08249	0.0843113	-1.39321	-1.43394	-1.46884	-2.15199	-0.68098	-1.47487	-2.00821	-2.42799	0.0115872	FALSE	no hit
DAGLA	747	-0.115594	1.97603	-1.04303	-1.27979	-1.92147	-3.16168	-0.501853	-2.10087	-1.4249	-1.36527	-1.95274	-0.956703	-2.71981	-2.71221	-4.27764	-1.1696	FALSE	no hit
DBT	1629	-2.00143	-1.30043	-2.44496	-2.25891	-1.0013	-0.261365	0.220815	-2.96334	-0.977284	-0.155362	-1.6995	-1.07699	-1.07494	0.334723	-2.61935	-0.940201	FALSE	no hit
DCTN2	10540	-1.73013	0.696201	-3.69627	-2.19031	-2.62777	-4.8479	-0.204756	-2.83065	-1.87558	-1.5552	-3.01951	-1.05203	-2.60677	-2.00357	-4.94856	-0.868184	FALSE	no hit
DDX11	1663	-3.48232	-0.456611	-4.57547	-5.41489	-2.16836	-3.12795	-0.236875	-3.14025	-2.2272	-2.35098	-2.26422	-2.0664	-1.73213	-2.08409	-2.59572	-0.516573	FALSE	toxic
DEFB1	1672	-3.43043	-1.12641	-5.44651	-3.71836	-2.80213	-3.97106	-1.09605	-3.33928	-2.50298	-3.4736	-3.27339	-0.761956	-2.09742	-2.62705	-4.42932	0.764118	FALSE	toxic
DEFB127	140850	-1.89945	0.699954	-3.39607	-3.00223	0.547563	0.463712	1.43329	-0.254316	-0.952056	-0.520936	-1.62694	-0.708291	-0.838635	-1.0827	-1.77578	0.342574	FALSE	no hit
DGKA	1606	-2.98584	-0.256614	-4.23493	-4.46598	-2.11671	-2.45346	-1.67418	-2.2225	-1.74903	-1.07989	-2.92231	-1.24488	-1.803	-1.18344	-4.49031	0.26475	FALSE	no hit
DHRS2	10202	-3.18821	0.513507	-6.40479	-3.67334	-1.99802	-2.60522	-1.14423	-2.24462	-2.0321	-1.76815	-3.61735	-0.710799	-1.91608	-2.12352	-4.51953	0.894803	FALSE	no hit
DIO3	1735	-2.19727	1.0825	-4.34338	-3.33093	-0.0661086	-0.362539	1.10408	-0.939864	-1.45893	-0.436208	-3.07844	-0.862141	-1.93562	-1.50434	-4.60612	0.303602	FALSE	no hit
DLK1	8788	-1.01656	1.85311	-2.70891	-2.19387	-2.0736	-3.36402	-0.00401483	-2.85276	-0.959834	-0.60808	-2.16847	-0.102957	-1.59586	-2.11729	-3.76478	1.0945	FALSE	no hit
DNAJB1	3337	-2.55166	0.858674	-5.28302	-3.23065	-0.809238	-1.42486	-0.228845	-0.774006	-1.75162	-1.86278	-2.91586	-0.476216	-1.60136	-2.40845	-3.5209	1.12528	FALSE	no hit
CTLA4	1493	-0.910305	-0.443458	-0.871582	-1.41587	-0.84749	-1.22251	-0.590179	-0.729777	0.214185	1.26662	0.0525603	-0.67662	0.290864	0.944511	0.401148	-0.473067	FALSE	no hit
CTSG	1511	0.207158	0.0497036	1.81969	-1.24792	-1.73656	-2.3017	-1.39314	-1.51484	-0.0181449	0.170883	-0.0528986	-0.172419	-0.515703	-0.235043	-1.72501	0.412938	FALSE	no hit
CUTA	51596	-0.718193	0.163331	-1.09593	-1.22198	-1.70589	-2.80757	-1.24861	-1.06149	-0.619107	-0.183368	-1.16838	-0.505572	-1.07801	-0.648496	-2.21253	-0.373005	FALSE	no hit
CXCL2	2920	-0.720833	0.779711	-1.61659	-1.32562	-0.945728	-1.5429	-0.951514	-0.342774	-0.150014	0.472151	-0.668571	-0.253621	-0.384885	-0.662139	-0.669149	0.176633	FALSE	no hit
CYB5D2	124936	-0.0675119	0.524856	-0.928218	0.200826	-0.160885	0.311952	0.333231	-1.12784	-0.349737	-0.569174	-0.740328	0.260292	-0.881169	-1.24545	-1.57915	0.181096	FALSE	no hit
CYP11A1	1583	-1.38837	0.623692	-2.18981	-2.59898	-3.93147	-5.70788	-2.66986	-3.41668	-0.930054	-0.413907	-1.88912	-0.487134	-1.18677	-1.17681	-3.08998	0.706496	FALSE	toxic
CYP27A1	1593	-3.29899	-1.00139	-5.85478	-3.0408	-4.22829	-5.82591	-2.38079	-4.47818	-2.32048	-2.35961	-3.4569	-1.14494	-2.16094	-1.7045	-4.43937	-0.338959	FALSE	toxic
CYP2J2	1573	-1.5637	-0.145508	-3.09184	-1.45376	-2.72956	-3.48206	-1.16831	-3.53831	-1.98641	-2.47675	-2.37532	-1.10715	-2.53779	-2.31142	-3.91268	-1.38927	FALSE	toxic
CYP4F11	57834	-2.49047	-0.167285	-4.26917	-3.03494	-0.0448191	0.177054	-0.068252	-0.243259	-1.10366	-0.540542	-2.2547	-0.515741	-0.917596	-0.705473	-2.83849	0.791171	FALSE	no hit
CYS1	192668	-1.52306	0.779208	-1.98236	-3.36603	-2.59076	-3.26285	-0.606239	-3.9032	-0.711665	-0.989568	-0.242039	-0.903389	0.438933	-1.60216	2.51555	0.403402	TRUE	toxic
DAGLB	221955	-0.347799	1.05665	-1.19606	-0.903987	-1.58771	-2.74012	-0.309142	-1.71387	-1.13123	-0.596351	-2.06442	-0.732914	-2.314	-1.42693	-4.52888	-0.986191	FALSE	no hit
DCBLD2	131566	-1.83126	1.23408	-3.38723	-3.34064	-1.464	-1.30683	-0.542002	-2.54316	-1.8859	-1.50458	-2.69536	-1.45776	-2.58223	-2.40101	-4.488	-0.857672	FALSE	no hit
DCTN3	11258	-3.90319	-0.681127	-6.93602	-4.09241	-1.2716	-1.15507	-0.702595	-1.95713	-2.32774	-2.06346	-3.66123	-1.25853	-1.89721	-1.63593	-4.13205	0.0763432	FALSE	no hit
DDX19B	11269	-1.88146	0.37718	-4.42269	-1.59888	-0.373276	-0.278227	0.164608	-1.00621	-1.51985	-1.27652	-3.17998	-0.10304	-1.92186	-1.71621	-4.76411	0.714732	FALSE	no hit
DEFB110	245913	-2.95583	-0.0668115	-4.66328	-4.1374	-0.475616	-1.35741	0.0521927	-0.121629	-1.89576	-1.80524	-2.74568	-1.13636	-1.72038	-1.84944	-3.69212	0.380428	FALSE	no hit
DEFB128	245939	-0.700681	2.17448	-1.27066	-3.00586	0.343768	1.37427	0.132489	-0.475461	-1.0291	0.031814	-2.50673	-0.612379	-2.20254	-1.76701	-5.44948	0.608881	FALSE	no hit
DGKD	8527	-2.93112	-0.0354386	-5.37252	-3.38541	-0.324813	-0.193916	0.325201	-1.10572	-1.56663	-1.20943	-3.26675	-0.223697	-1.35454	-1.37142	-4.45198	1.75978	FALSE	no hit
DHRS3	9249	-1.33194	0.955175	-3.52423	-1.42676	0.168844	-0.581748	0.236875	0.851406	-0.997959	-0.676122	-2.80406	0.486301	-1.51008	-1.60422	-4.69295	1.76693	FALSE	no hit
DIP2A	23181	-1.04198	2.41531	-3.72884	-1.8124	-2.71566	-4.67928	-0.847128	-2.62056	-1.09315	-0.690736	-2.56792	-0.0207866	-1.81686	-2.49679	-3.91167	0.957879	FALSE	no hit
DLK2	65989	-2.69275	0.785611	-4.98952	-3.87435	-0.656784	-1.84642	0.871217	-0.99515	-1.53761	-0.859151	-3.09488	-0.658792	-1.5987	-1.59963	-4.39325	1.19679	FALSE	no hit
DNAJB11	51726	-3.11386	1.63315	-5.65892	-5.31583	-0.816657	-1.44172	0.0200741	-1.02832	-1.87094	-1.14578	-3.34077	-1.12628	-1.79995	-2.35866	-4.40207	1.36089	FALSE	no hit
CTNNB1	1499	-1.63347	-1.87085	-2.59067	-0.438893	-1.66212	-1.20565	-1.24861	-2.5321	-0.538995	-0.927668	-0.670948	-0.018368	0.137293	0.121998	0.1239	0.165981	TRUE	no hit
CTSH	1512	-0.915954	-0.823376	-2.09815	0.173666	-1.50085	-1.98132	-0.542002	-1.97924	-0.796486	-1.40802	-1.25178	0.270346	-0.816064	-0.982016	-1.68971	0.223535	FALSE	no hit
CUX2	23316	-1.03646	0.37646	-2.49053	-0.995327	-0.824595	-1.93073	0.164608	-0.707662	-0.740838	-0.930731	-0.882859	-0.408925	-0.730106	-1.37954	-0.597821	-0.212957	FALSE	no hit
CXCL3	2921	-1.71528	-0.336693	-2.19961	-2.60953	-0.559708	-1.2731	-0.0521927	-0.353831	-1.27165	-1.73624	-1.24744	-0.831273	-1.03401	-1.52772	-1.59047	0.0161537	FALSE	no hit
[truncated: 6,479 more rows]
