# Supplementary material
Source: JCI journal article supplement (doi:10.1172/jci202204)

AP4B1

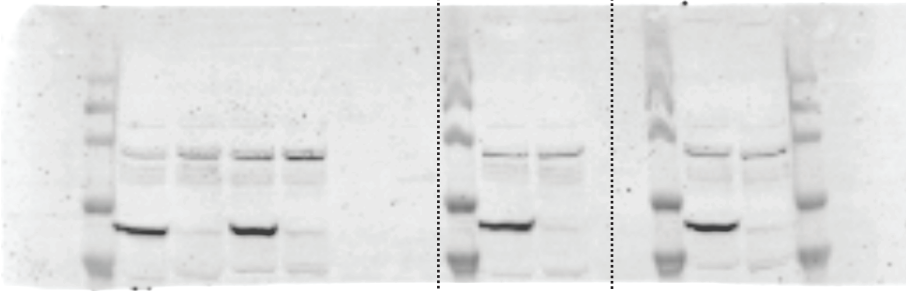

AP4E1

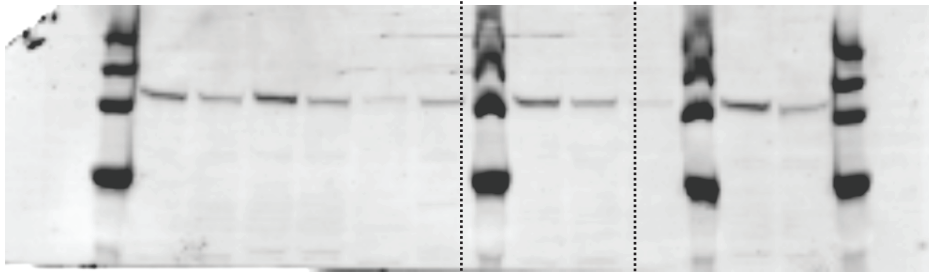

ATG9A

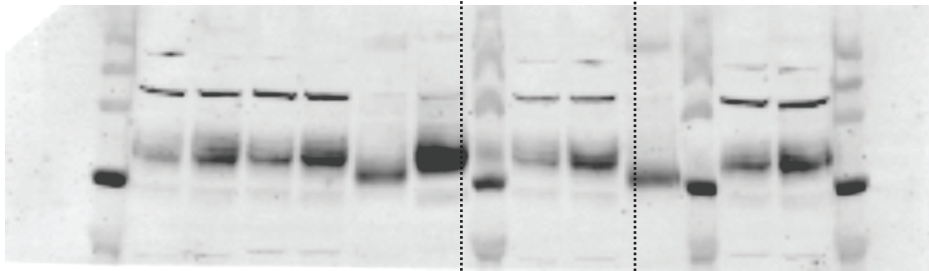

Cas9

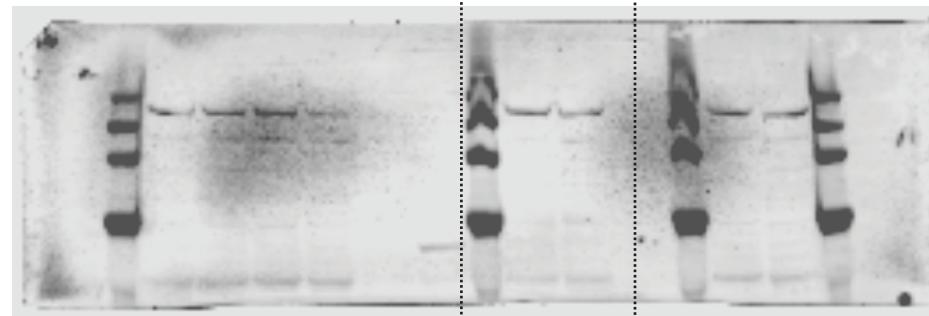

b-Actin

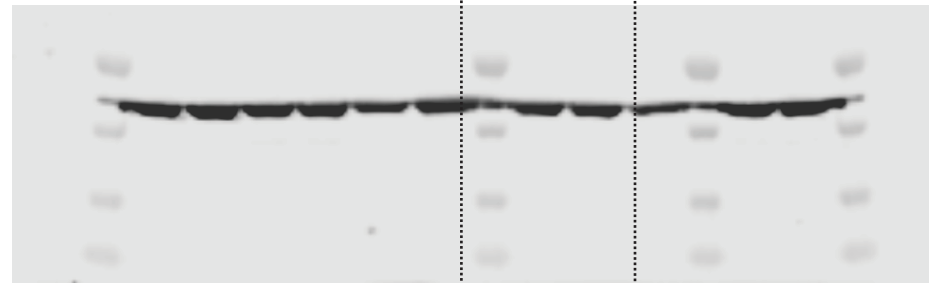

b-Actin

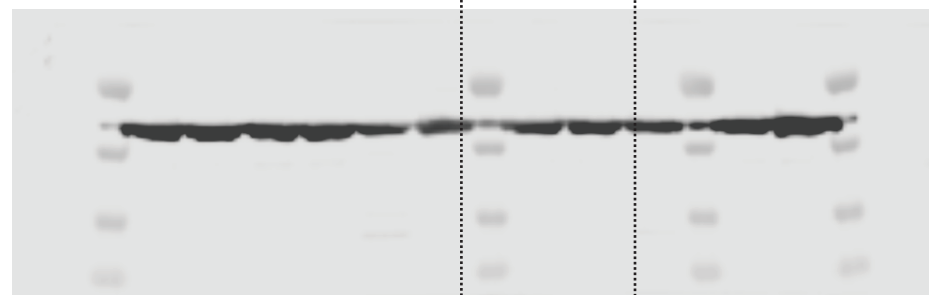

Ladder  
AP4B1<sup>WT</sup>  
AP4B1<sup>KO</sup>

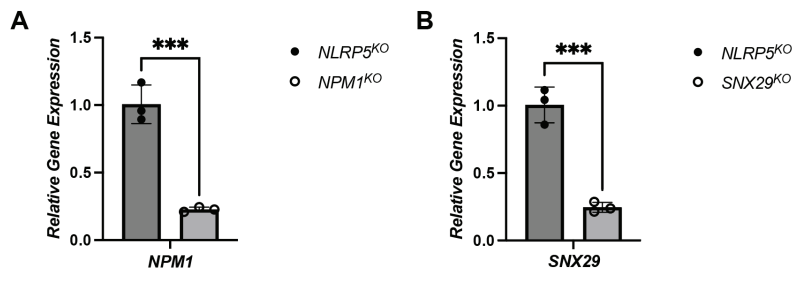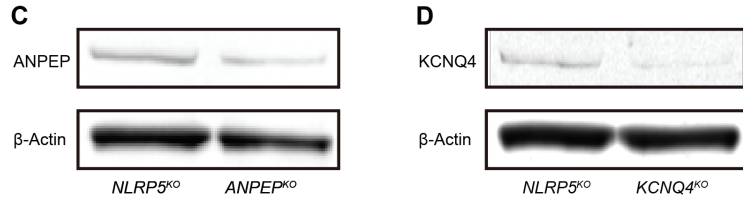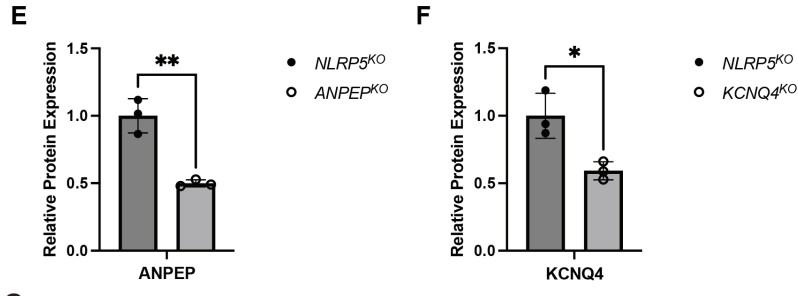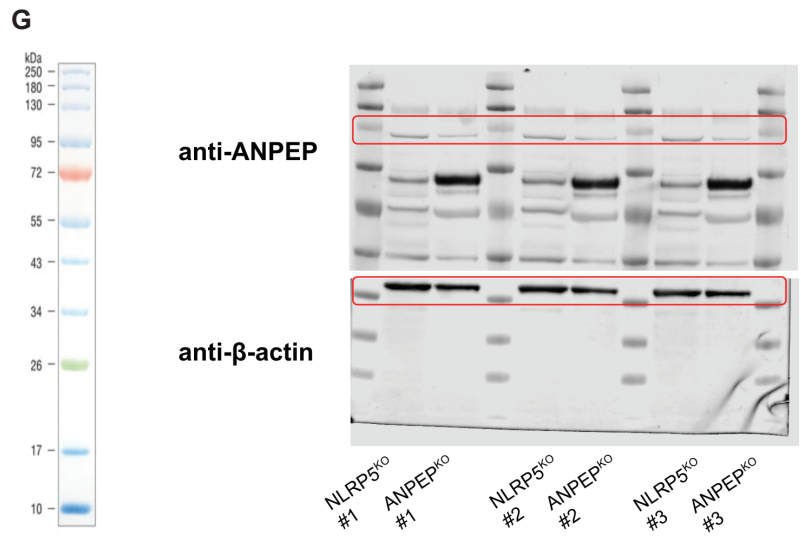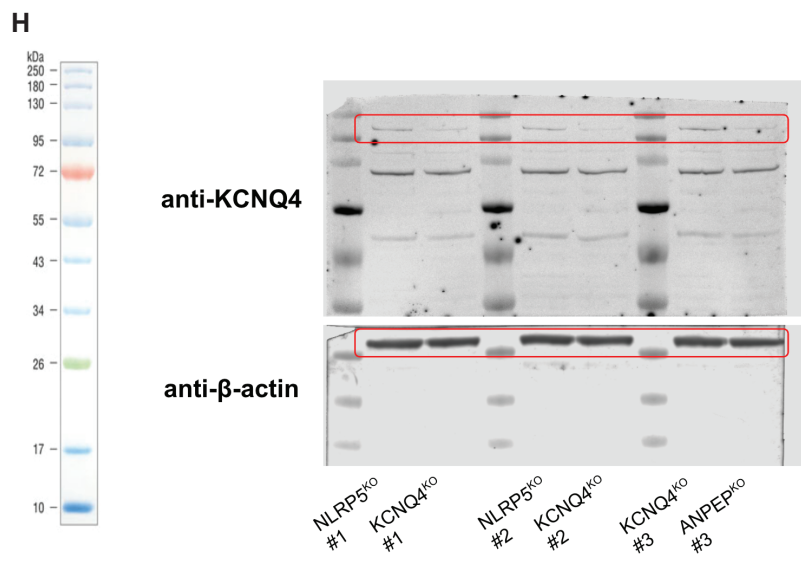

Supplement: sd1 [file 1]
